# Supplementary material for: ALV-miRNA-p19-01 Promotes Viral Replication via Targeting Dual Specificity Phosphatase 6
Source: MDPI journal article supplement (doi:10.3390/v14040805), 2022-04-13

Figure S1

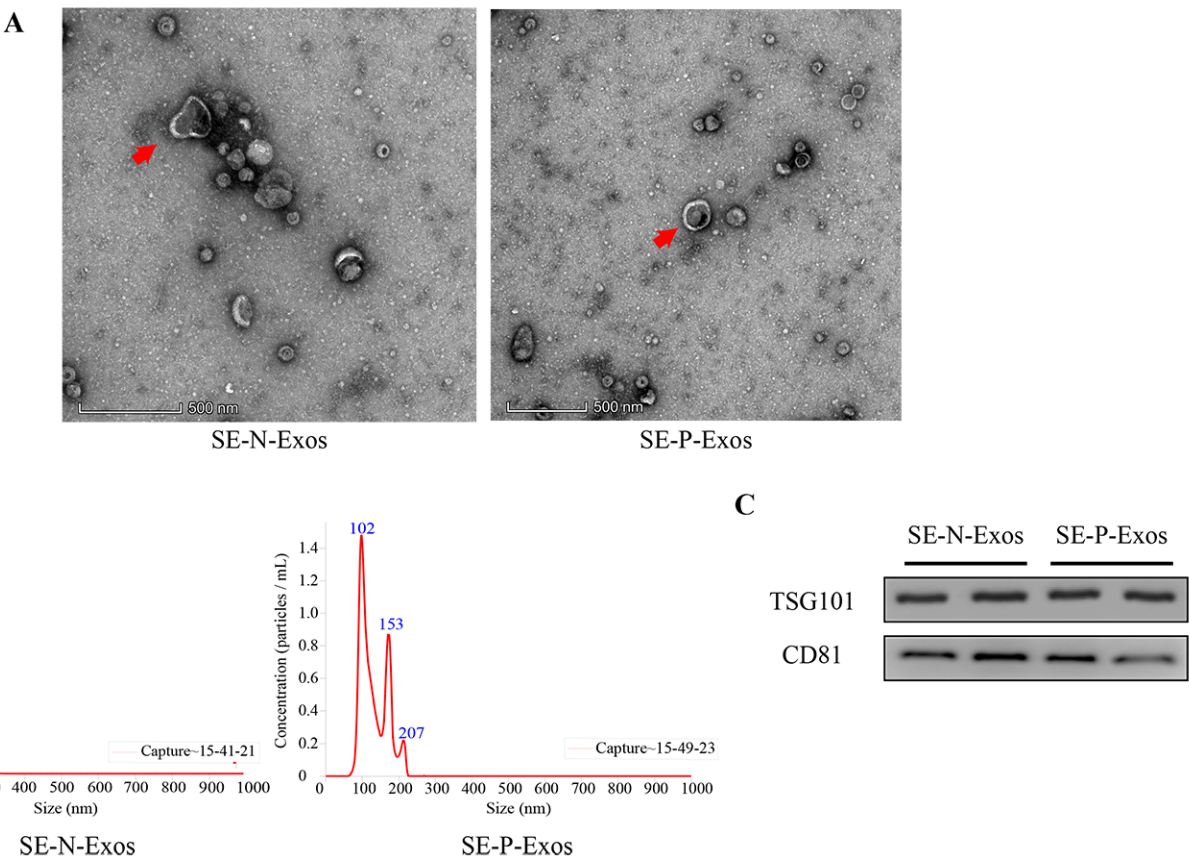

**Figure.S1:**Identification of semen exosomes from cocks. (A) Transmission electron microscope for observing morphology of exosomes. (B) Nanoparticle Tracking Analysis for analyzing SE-N-Exos and SE-P-Exos.(C) Western Blot analysis of the exosomal-marker proteins TSG101 and CD81. SE-N-Exos: semen exosomes of ALV-J-negative cocks, SE-P-Exos: semen exosomes of ALV-J-positive cocks.

Figure S2

|                                |   |                                 |              |               |             |           |                  |
|--------------------------------|---|---------------------------------|--------------|---------------|-------------|-----------|------------------|
| pre-ALV-miRNA-p19-01           |   | -----CUGGGAUCCCAUUACCGCGGCACUCA | CCCAGCGGGCAU | GGUACUU       | GGGAAAT     | Strain    |                  |
| ALV<br>subtypes                | K | CCGGGGTCTCTGGGATCCCATTACCGCGGC  | ACTCA        | CCCAGCGGGCAAT | GGTACTT     | GGGAAAT   | JS13LY19         |
|                                | J | CCGGGGTCTCTGGGATCCCATTACCGCGGC  | ACTCA        | CCCAGCGGGCAAT | GGTACTT     | GGGAAAT   | NX0101           |
|                                |   | CCGGGGTCTCTGGGATCCCATTACCGCGGC  | GCTCT        | CCCAGCGGGCAAT | GGTACTT     | GGGAAAT   | SCAU1903         |
|                                | E | CCGGGGTCTCTGGGATCCCATTACCGCGGC  | ACTCA        | CCCAGCGGGCAAT | GGTACTT     | GGGAAAT   | AF229            |
|                                |   | CCGGGGTCTCTGGGATCCCATTACCGCGGC  | ACTCA        | CCCAGCGGGCAAT | GGTACTT     | GGGAAAT   | ALVE-B9          |
|                                | D | CCGGGGTCTCTGGGATCCCATTACTGCGGC  | GCTCT        | CCCAGCGGGCAAT | GATAC       | TTGGAAAAT | Schmidt-Ruppin D |
|                                | C | CCGGGGTCTCTGGGATCCCATTACCGCGGC  | GCTAT        | CCCAGCGGGCT   | ATGATAC     | TTGGGAAAT | Prague           |
|                                | B | CCGGGGTCTCTGGGATCCCATTACCGCGGC  | ACTCA        | CCCAGCGGGCAAT | GGTACTT     | GGGAAAT   | GX14FF03         |
|                                |   | CCGGGGTCTCTGGGATCCCATTACCGCGGC  | ACTCA        | CCCAGCGGGCAAT | GGTACTT     | GGGAAAT   | WD11150b         |
|                                | A | CCGGGGTCTCTGGGATCCCATTACTGCGGC  | ACTCA        | CCCAGCGGCA    | CAATGGTACTT | GGGAAAT   | SDAU09E1         |
| CCGGGGTCTCTGGGATCCCATTACCGCGGC |   | GCTCT                           | CCCAGCGGGCT  | ATGGTACTT     | GGGAAAT     | SDAU09C3  |                  |

Figure.S2:Conserved analysis of ALV-miRNA-p19-01 among different ALV subtypes.

Figure S3

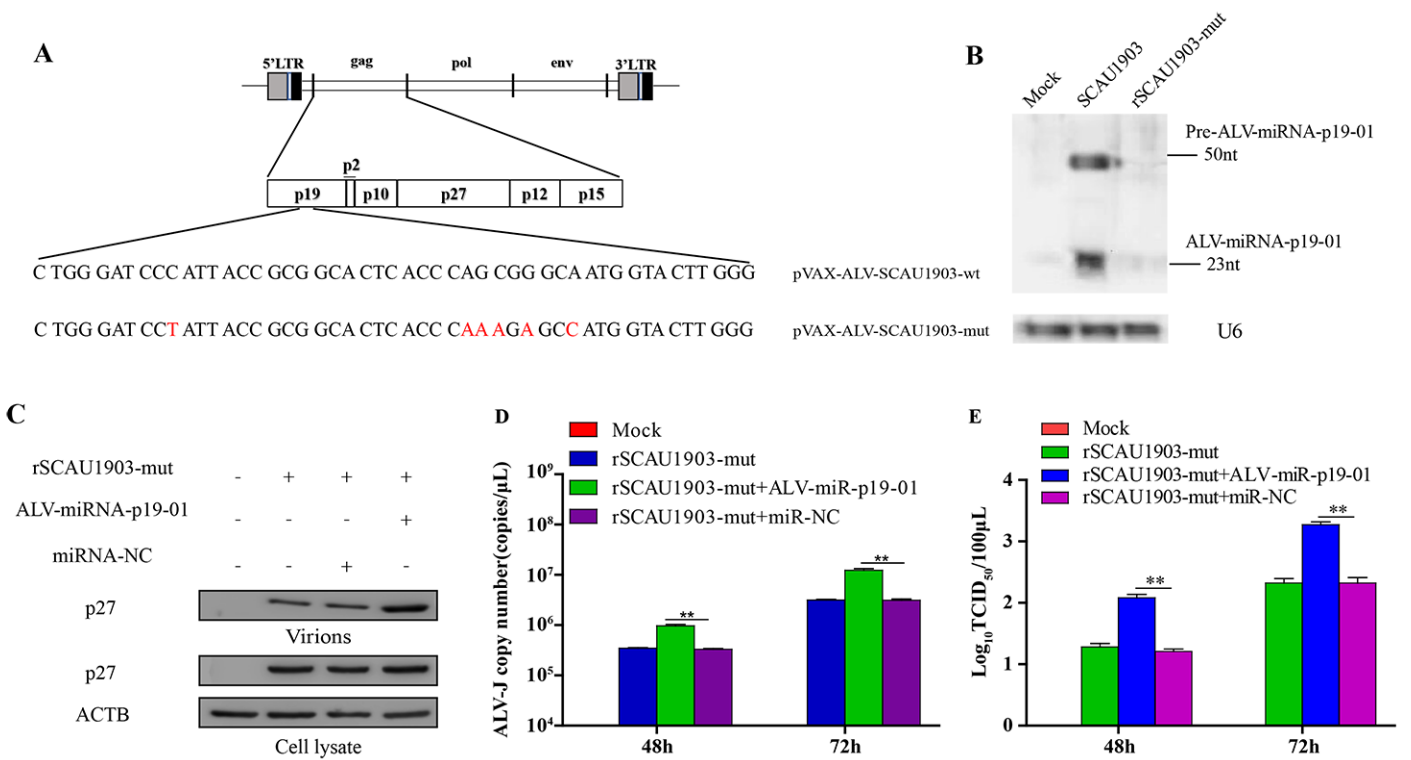

**Figure.S3:**ALV-miRNA-p19-01 promotes rSCAU1903-mut release. (A) Mutant sequence of pVAX-ALV-SCAU1903-mut compared to that of pVAX-ALV-SCAU1903-wt. (B) DF-1 cells were infected with ALV-J SCAU1903 or rSCAU1903-mut. The RNA was used to detect the ALV-miRNA-p19-01 by Northern Blot, U6 as a control. (C to E) DF-1 cells respectively transfected with ALV-miRNA-p19-01 mimic and miR-NC were infected with rSCAU1903-mut at 4 hpt. (C) The expression of p27 protein were examined by Western Blot. (D) The transcriptional level of viral particles in supernatants were measured by RT-PCR. (E) The supernatants from infected cells were titrated in DF-1 cells by ELISA for TCID<sub>50</sub>.

Figure S4

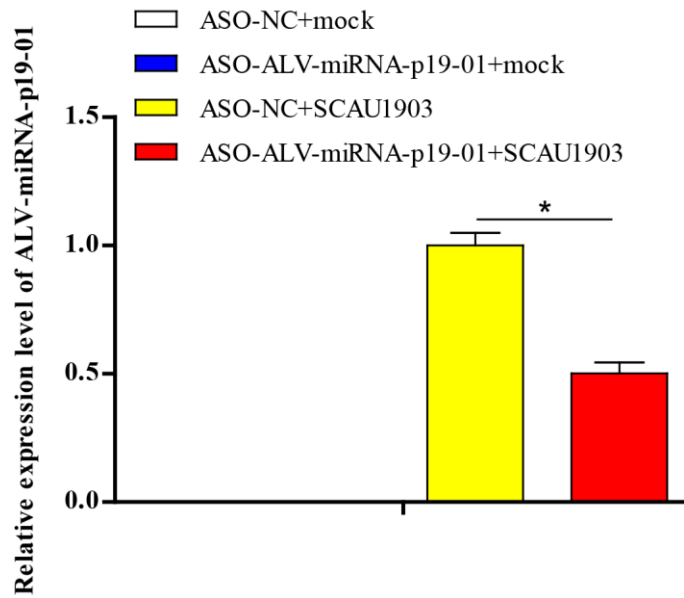

**Figure.S4:**The inhibitory efficiency of ASO-ALV-miRNA-p19-01. ASO-ALV-miRNA-p19-01 was transfected into DF-1 cells and then infected with ALV-J SCAU1903 at 4 hpt. ALV-miRNA-p19-01 expression was examined by RT-qPCR.

Figure S5

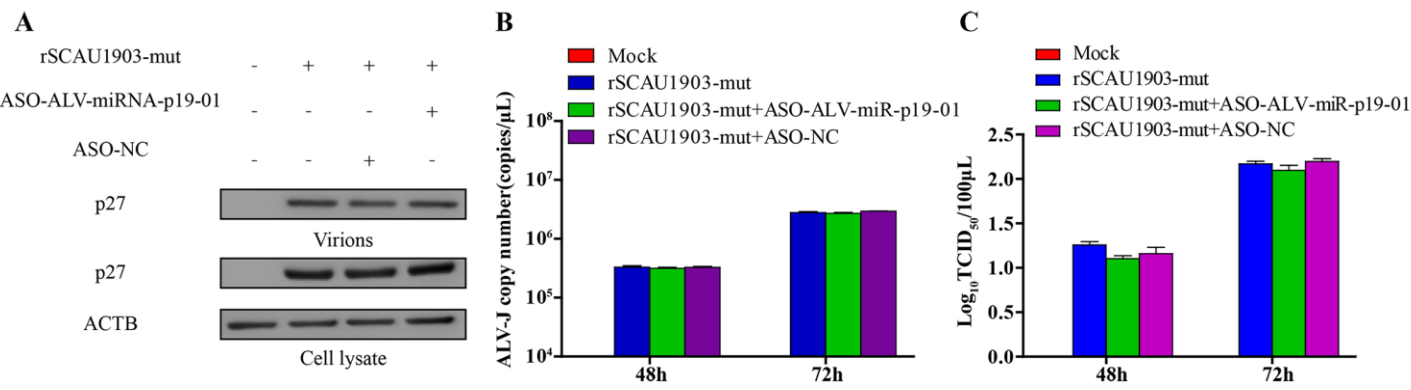

**Figure.S5:**ASO-ALV-miRNA-p19-01 does not affect rSCAU1903-mut release. (A to C) DF-1 cells respectively transfected with ASO-ALV-miRNA-p19-01 mimic and ASO-NC were infected with rSCAU1903-mut at 4 hpt. (A) The expression of p27 protein were examined by Western Blot. (B) The transcriptional level of viral particles in supernatants were measured by RT-PCR. (C) The supernatants from infected cells were titrated in DF-1 cells by ELISA for TCID<sub>50</sub>.

Figure S6

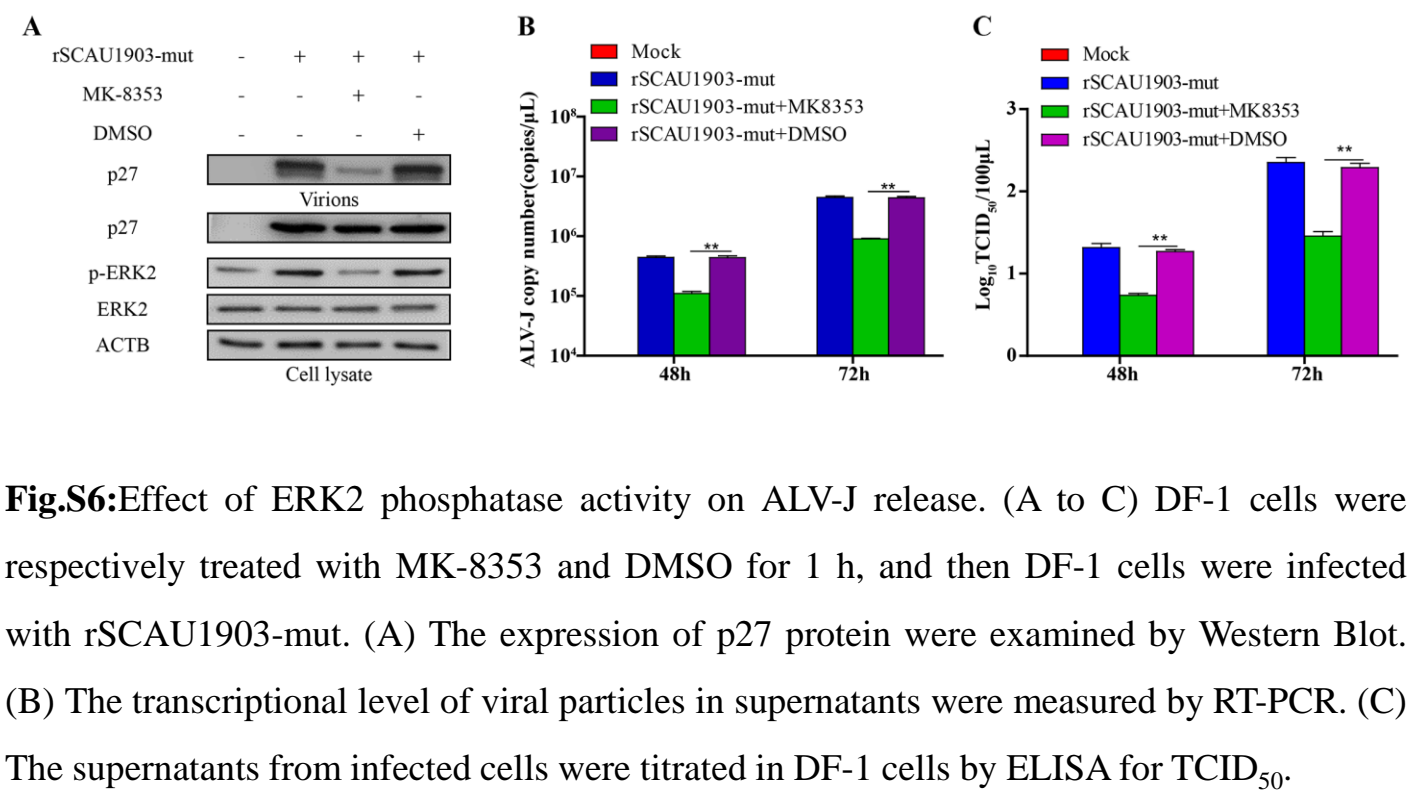

Supplement: s1 [file s1]
