# Supplementary material for: ALV-miRNA-p19-01 Promotes Viral Replication via Targeting Dual Specificity Phosphatase 6
Source: Viruses. 2022 Apr 13;14(4):805. doi: 10.3390/v14040805 (PMC9024826; doi:10.3390/v14040805)
Supplement: Supplementary file 1 [file viruses-14-00805-s001.zip]

Archive with 4 entries (4 files):
- Supplementary Figure.pdf
- Table S1.xlsx
- Table S2.xlsx
- Table S3.xlsx
