# Supplementary material for: ALV-miRNA-p19-01 Promotes Viral Replication via Targeting Dual Specificity Phosphatase 6
Source: Viruses. 2022 Apr 13;14(4):805. doi: 10.3390/v14040805 (PMC9024826; doi:10.3390/v14040805)
Supplement: Supplementary file 1 [file viruses-14-00805-s001.zip › Table S1.xlsx]

## Sheet: Sheet1
S1 Table Sequences of primers used for quantitative RT-PCR method
Gene ID	Primer Name	Sequence (5'–3')
GAPDH	GAPDH-F	GAACATCATCCCAGCGTCCA
	GAPDH-R	CGGCAGGTCAGGTCAACAAC
DUSP6	DUSP6-F	CGACTGGAACGAGAACACGG
	DUSP6-R	TGGAACTTGCTGAAACCACCT
gp85	gp85-F	AGTCAGCGACCTCACCATTC
	gp85-R	GGTGTTGTTATCGCAAGCAG
gga-miR-375	RT	GTCGTATCCAGTGCAGGGTCCGAGGTATTCGCACTGGATACGACTAACGC
	gga-miR-375-F	TTTGTTCGTTCGGCTCG
ALV-miRNA-p19-01	RT	GTCGTATCCAGTGCAGGGTCCGAGGTATTCGCACTGGATACGACCCCAAG
	mirna-19-F	CCCAGCGGGCAATGGTA
U6	U6-F	CGATACAGAGAAGATTAGCATGGC
	U6-R	AACGCTTCACGAATTTGCGT
	miR-R	GTGCAGGGTCCGAGGT
