# Supplementary material for: ALV-miRNA-p19-01 Promotes Viral Replication via Targeting Dual Specificity Phosphatase 6
Source: Viruses. 2022 Apr 13;14(4):805. doi: 10.3390/v14040805 (PMC9024826; doi:10.3390/v14040805)
Supplement: Supplementary file 1 [file viruses-14-00805-s001.zip › Table S2.xlsx]

## Sheet: miRDB target prediction data
miRNA Name	Gene ID	Gene Symbol	Transcript Accession	Gene Description
gga-miR-138-5p	419100	UPF2	XM_004937485	UPF2 regulator of nonsense transcripts homolog (yeast)
gga-miR-138-5p	416900	KCTD10	XM_004945619	potassium channel tetramerisation domain containing 10
gga-miR-138-5p	420784	EZH2	XM_004935061	enhancer of zeste homolog 2 (Drosophila)
gga-miR-138-5p	415432	MYEF2	NM_001012768	myelin expression factor 2
gga-miR-138-5p	425119	SUV420H1	XM_422910	suppressor of variegation 4-20 homolog 1 (Drosophila)
gga-miR-138-5p	428685	CDR2L	XM_426243	cerebellar degeneration-related protein 2-like
gga-miR-138-5p	415307	SIN3A	XM_413695	SIN3 transcription regulator homolog A (yeast)
gga-miR-138-5p	417260	NELF	XM_415535	nasal embryonic LHRH factor
gga-miR-138-5p	420109	GATAD2A	NM_001012552	GATA zinc finger domain containing 2A
gga-miR-138-5p	415781	LSM14A	NM_001012778	LSM14A, SCD6 homolog A (S. cerevisiae)
gga-miR-6706-5p	417210	SET	NM_001030691	SET nuclear oncogene
gga-miR-15c-5p	771872	CLDN12	XM_004939280	claudin 12
gga-miR-15c-5p	420643	DPH3	XM_004939394	DPH3, KTI11 homolog (S. cerevisiae)
gga-miR-15c-5p	418183	PLEKHA5	XM_004937972	pleckstrin homology domain containing, family A member 5
gga-miR-15c-5p	771985	PTPRR	XM_001235187	protein tyrosine phosphatase, receptor type, R
gga-miR-15c-5p	429007	MOB4	NM_001031557	MOB family member 4, phocein
gga-miR-15c-5p	418196	ETNK1	XM_416426	ethanolamine kinase 1
gga-miR-15c-5p	421497	AKT3	XM_419544	v-akt murine thymoma viral oncogene homolog 3 (protein kinase B, gamma)
gga-miR-15c-5p	427123	SLC12A2	XM_004949377	solute carrier family 12 (sodium/potassium/chloride transporters), member 2
gga-miR-15c-5p	417245	PAPPA	XM_415522	pregnancy-associated plasma protein A, pappalysin 1
gga-miR-15c-5p	431253	TACC1	XM_004947595	transforming, acidic coiled-coil containing protein 1
gga-miR-15c-5p	424083	STRADB	XM_421938	STE20-related kinase adaptor beta
gga-miR-15c-5p	423778	MAPK8	XM_004942133	mitogen-activated protein kinase 8
gga-miR-15c-5p	419484	MFN2	XM_417640	mitofusin 2
gga-miR-15c-5p	396085	NF1	XM_004946786	neurofibromin 1
gga-miR-15c-5p	426117	CCNE1	NM_001031358	cyclin E1
gga-miR-15c-5p	424666	PPAP2B	NM_001130488	phosphatidic acid phosphatase type 2B
gga-miR-1628	423258	SRSF5	NM_001031197	serine/arginine-rich splicing factor 5
gga-miR-138-5p	418153	ERC1	XM_416384	ELKS/RAB6-interacting/CAST family member 1
gga-miR-138-5p	421494	PPPDE1	NM_001008460	PPPDE peptidase domain containing 1
gga-miR-138-5p	395814	FMOD	NM_204967	fibromodulin
gga-miR-138-5p	770321	LOC770321	XM_004939857	acyl-protein thioesterase 1-like
gga-miR-138-5p	422254	ATP11C	XM_004940684	ATPase, class VI, type 11C
gga-miR-138-5p	426796	SNCAIP	XM_424409	synuclein, alpha interacting protein
gga-miR-138-5p	429148	LPP	NM_001031567	LIM domain containing preferred translocation partner in lipoma
gga-miR-138-5p	419752	ARHGEF12	XM_417890	Rho guanine nucleotide exchange factor (GEF) 12
gga-miR-138-5p	423589	PLEKHC1	XM_001235202	pleckstrin homology domain containing, family C (with FERM domain) member 1
gga-miR-138-5p	416497	C14H17ORF103	NM_001030633	chromosome 14 open reading frame, human C17orf103
gga-miR-138-5p	424215	RQCD1	NM_001006521	RCD1 required for cell differentiation1 homolog (S. pombe)
gga-miR-1457	420254	AZIN1	NM_001008729	antizyme inhibitor 1
gga-miR-6706-5p	421492	HNRNPU	XM_419539	heterogeneous nuclear ribonucleoprotein U (scaffold attachment factor A)
gga-miR-6706-5p	418265	MAN1A2	XM_416490	mannosidase, alpha, class 1A, member 2
gga-miR-6706-5p	424461	OLFM3	XM_003641696	olfactomedin 3
gga-miR-6706-5p	770954	KCNK2	XM_001234269	potassium channel, subfamily K, member 2
gga-miR-6706-5p	395800	CEBPG	NM_206859	CCAAT/enhancer binding protein (C/EBP), gamma
gga-miR-15c-5p	422077	BAIAP2	XM_004946268	BAI1-associated protein 2
gga-miR-15c-5p	417920	CDK17	XM_003640361	cyclin-dependent kinase 17
gga-miR-15c-5p	395904	ZFHX4	XM_004939917	zinc finger homeobox 4
gga-miR-15c-5p	417260	NELF	XM_415535	nasal embryonic LHRH factor
gga-miR-15c-5p	416974	RNF10	XM_415267	ring finger protein 10
gga-miR-15c-5p	424632	TTC39A	XM_004936785	tetratricopeptide repeat domain 39A
gga-miR-15c-5p	417015	MTMR3	XM_004934455	myotubularin related protein 3
gga-miR-15c-5p	424449	C8H1ORF21	XM_422292	chromosome 8 open reading frame, human C1orf21
gga-miR-15c-5p	420009	VAT1	XM_418130	vesicle amine transport protein 1 homolog (T. californica)
gga-miR-15c-5p	426557	RGS8	XM_004943208	regulator of G-protein signaling 8
gga-miR-15c-5p	418471	USP25	XM_004938353	ubiquitin specific peptidase 25
gga-miR-15c-5p	419448	UBE4B	XM_004947453	ubiquitination factor E4B
gga-miR-15c-5p	429024	TLK1	XM_426581	tousled-like kinase 1
gga-miR-15c-5p	415507	CHD2	NM_001278454	chromodomain helicase DNA binding protein 2
gga-miR-15c-5p	418909	KL	XM_417105	klotho
gga-miR-15c-5p	421579	MAP3K4	XM_004935567	mitogen-activated protein kinase kinase kinase 4
gga-miR-15c-5p	421915	MYT1L	XM_004940506	myelin transcription factor 1-like
gga-miR-15c-5p	422187	RAB9B	XM_001232273	RAB9B, member RAS oncogene family
gga-miR-15c-5p	373967	SLIT2	NM_001267075	slit homolog 2 (Drosophila)
gga-miR-15c-5p	427447	RICTOR	XM_003642978	RPTOR independent companion of MTOR, complex 2
gga-miR-1701	418585	TMEM47	XM_416786	transmembrane protein 47
gga-miR-1701	415388	TJP1	XM_413773	tight junction protein 1 (zona occludens 1)
gga-miR-1701	419554	PUM1	NM_001012840	pumilio homolog 1 (Drosophila)
gga-miR-138-5p	420289	TRPS1	XM_418402	trichorhinophalangeal syndrome I
gga-miR-138-5p	100859397	LOC100859397	XM_004950903	TRIO and F-actin-binding protein-like
gga-miR-138-5p	419159	SOGA1	XM_004946982	suppressor of glucose, autophagy associated 1
gga-miR-138-5p	420343	FBXO32	NM_001030956	F-box protein 32
gga-miR-138-5p	417830	TBC1D30	XM_416071	TBC1 domain family, member 30
gga-miR-138-5p	770701	KLHL25	XM_004943857	kelch-like 25 (Drosophila)
gga-miR-138-5p	100857704	GMNC	XM_003641789	geminin coiled-coil domain containing
gga-miR-138-5p	427850	RELN	XM_425424	reelin
gga-miR-138-5p	769163	FILIP1L	XM_003640468	filamin A interacting protein 1-like
gga-miR-138-5p	419183	SYS1	NM_001278005	SYS1 Golgi-localized integral membrane protein homolog (S. cerevisiae)
gga-miR-138-5p	428458	UBP1	XM_004939489	upstream binding protein 1 (LBP-1a)
gga-miR-138-5p	419747	CLMP	XM_004948012	CXADR-like membrane protein
gga-miR-138-5p	426881	LOC426881	XM_004949729	glycerol-3-phosphate dehydrogenase [NAD+], cytoplasmic-like
gga-miR-138-5p	417180	LAMC3	XM_004945884	laminin, gamma 3
gga-miR-138-5p	428222	EIF2C1	XM_004947768	eukaryotic translation initiation factor 2C, 1
gga-miR-138-5p	420633	JAZF1	NM_001199618	JAZF zinc finger 1
gga-miR-1457	424519	PKN2	XM_422357	protein kinase N2
gga-miR-1457	424332	2019-03-07	XM_004943066	membrane-associated ring finger (C3HC4) 7, E3 ubiquitin protein ligase
gga-miR-1457	424747	DGKD	XM_422569	diacylglycerol kinase, delta 130kDa
gga-miR-6706-5p	395706	SCD	NM_204890	stearoyl-CoA desaturase (delta-9-desaturase)
gga-miR-6706-5p	100858928	HRH1	XM_004944510	histamine receptor H1
gga-miR-6706-5p	418255	RIMKLB	XM_004938100	ribosomal modification protein rimK-like family member B
gga-miR-6706-5p	421621	SASH1	XM_004935598	SAM and SH3 domain containing 1
gga-miR-6706-5p	100857885	KIAA1549	XM_004937850	KIAA1549
gga-miR-6706-5p	428901	FLRT2	XM_003641305	fibronectin leucine rich transmembrane protein 2
gga-miR-15c-5p	422508	CNOT6L	XM_004941023	CCR4-NOT transcription complex, subunit 6-like
gga-miR-15c-5p	416569	RBBP6	XM_414870	retinoblastoma binding protein 6
gga-miR-15c-5p	395446	SALL1	NM_204707	sal-like 1 (Drosophila)
gga-miR-15c-5p	408046	KIF5C	XM_422155	kinesin family member 5C
gga-miR-15c-5p	419685	LYPLA2	NM_001162382	lysophospholipase II
gga-miR-15c-5p	420202	SNX16	NM_001199488	sorting nexin 16
gga-miR-15c-5p	373991	CLOCK	NM_204174	clock homolog (mouse)
gga-miR-15c-5p	417427	HELZ	XM_004946215	helicase with zinc finger
gga-miR-15c-5p	419172	DHX35	XM_417352	DEAH (Asp-Glu-Ala-His) box polypeptide 35
gga-miR-15c-5p	416487	SMURF1	XM_004945162	SMAD specific E3 ubiquitin protein ligase 1
gga-miR-15c-5p	418567	DDX3X	NM_001030800	DEAD (Asp-Glu-Ala-Asp) box polypeptide 3, X-linked
gga-miR-15c-5p	420406	KLHL18	NM_001030960	kelch-like 18 (Drosophila)
gga-miR-15c-5p	418241	KIAA0930	XM_004938041	KIAA0930
gga-miR-15c-5p	415387	FAM189A1	XM_413772	family with sequence similarity 189, member A1
gga-miR-15c-5p	428188	H6PD	XM_425746	hexose-6-phosphate dehydrogenase (glucose 1-dehydrogenase)
gga-miR-15c-5p	422702	TSPAN5	XM_004935957	tetraspanin 5
gga-miR-1701	427146	MIER3	XM_004937250	mesoderm induction early response 1, family member 3
gga-miR-1628	395967	EPHA7	NM_205083	EPH receptor A7
gga-miR-138-5p	420923	DAP	NM_001031003	death-associated protein
gga-miR-138-5p	425523	CERK	NM_001031340	ceramide kinase
gga-miR-138-5p	417245	PAPPA	XM_415522	pregnancy-associated plasma protein A, pappalysin 1
gga-miR-138-5p	426785	INDOL1	XM_004947602	indoleamine-pyrrole 2,3 dioxygenase-like 1
gga-miR-138-5p	100858848	MIF4GD	XM_004946371	MIF4G domain containing
gga-miR-138-5p	419522	BNIP3L	NM_001030885	BCL2/adenovirus E1B 19kDa interacting protein 3-like
gga-miR-138-5p	415992	DCP1A	XM_004944567	DCP1 decapping enzyme homolog A (S. cerevisiae)
gga-miR-138-5p	420455	ZMYND11	XM_004939164	zinc finger, MYND-type containing 11
gga-miR-138-5p	416675	AHCYL2	XM_004937410	adenosylhomocysteinase-like 2
gga-miR-1457	421808	MAP3K7	XM_004940375	mitogen-activated protein kinase kinase kinase 7
gga-miR-1457	429422	C14ORF4	XM_426978	interferon regulatory factor 2 binding protein-like
gga-miR-1457	417389	CA10	XM_004946155	carbonic anhydrase X
gga-miR-1457	378791	RTN1	NM_001001466	reticulon 1
gga-miR-460b-5p	771383	RAB21	XM_001233647	RAB21, member RAS oncogene family
gga-miR-6706-5p	414743	TGFA	NM_001001614	transforming growth factor, alpha
gga-miR-6706-5p	422264	LOC422264	XM_004940704	protocadherin-11 X-linked-like
gga-miR-6706-5p	418462	VGLL3	XM_416671	vestigial like 3 (Drosophila)
gga-miR-15c-5p	423046	IPO7	XM_003641394	importin 7
gga-miR-15c-5p	420023	EZH1	XM_004948621	enhancer of zeste homolog 1 (Drosophila)
gga-miR-15c-5p	395497	ATP6V1B2	XM_424534	ATPase, H+ transporting, lysosomal 56/58kDa, V1 subunit B2
gga-miR-15c-5p	415739	N4BP1	NM_001030570	NEDD4 binding protein 1
gga-miR-15c-5p	417127	CAMSAP1	XM_004945990	calmodulin regulated spectrin-associated protein 1
gga-miR-15c-5p	425441	LOC425441	XM_423203	electroneutral sodium bicarbonate exchanger 1-like
gga-miR-15c-5p	423500	CDCA4	NM_001031212	cell division cycle associated 4
gga-miR-15c-5p	429069	RASAL2	XM_004943248	RAS protein activator like 2
gga-miR-15c-5p	772213	PHF19	XM_003642306	PHD finger protein 19
gga-miR-15c-5p	421360	PTPN14	XM_419419	protein tyrosine phosphatase, non-receptor type 14
gga-miR-15c-5p	423926	C6H10ORF46	NM_001031238	chromosome 6 open reading frame, human C10orf46
gga-miR-15c-5p	374224	PAFAH1B1	NM_204324	platelet-activating factor acetylhydrolase 1b, regulatory subunit 1 (45kDa)
gga-miR-15c-5p	419748	UBASH3B	XM_417888	ubiquitin associated and SH3 domain containing B
gga-miR-15c-5p	421020	SOCS6	NM_001127312	suppressor of cytokine signaling 6
gga-miR-15c-5p	429159	PHC3	XM_004943491	polyhomeotic homolog 3 (Drosophila)
gga-miR-15c-5p	423854	BTRC	XM_004942217	beta-transducin repeat containing
gga-miR-15c-5p	420804	RECK	XM_418897	reversion-inducing-cysteine-rich protein with kazal motifs
gga-miR-15c-5p	416313	SEC24A	XM_414630	SEC24 family, member A (S. cerevisiae)
gga-miR-15c-5p	417658	SYNRG	XM_004946755	synergin, gamma
gga-miR-15c-5p	423572	SOS2	XM_421461	son of sevenless homolog 2 (Drosophila)
gga-miR-15c-5p	425428	ZMAT3	XM_423190	zinc finger, matrin-type 3
gga-miR-15c-5p	419900	UHRF1BP1	XM_004935043	UHRF1 binding protein 1
gga-miR-15c-5p	420399	SNAP47	XM_004939091	synaptosomal-associated protein, 47kDa
gga-miR-15c-5p	416800	ULK1	XM_415091	unc-51-like kinase 1 (C. elegans)
gga-miR-15c-5p	428432	OSBPL3	XM_004939353	oxysterol binding protein-like 3
gga-miR-15c-5p	418210	RASSF8	XM_416437	Ras association (RalGDS/AF-6) domain family (N-terminal) member 8
gga-miR-1628	768795	SH3BGRL3	XM_004947666	SH3 domain binding glutamic acid-rich protein like 3
gga-miR-1628	416580	USP31	XM_003642146	ubiquitin specific peptidase 31
gga-miR-138-5p	771278	MED26	XM_004948934	mediator complex subunit 26
gga-miR-138-5p	417913	USP44	XM_004937641	ubiquitin specific peptidase 44
gga-miR-138-5p	415684	RFWD3	XM_004944127	ring finger and WD repeat domain 3
gga-miR-138-5p	417638	RNFT1	XM_004946719	ring finger protein, transmembrane 1
gga-miR-138-5p	418431	ARL13B	XM_416642	ADP-ribosylation factor-like 13B
gga-miR-138-5p	420264	RIMS2	XM_418375	regulating synaptic membrane exocytosis 2
gga-miR-138-5p	770192	MIER2	XM_004948783	mesoderm induction early response 1, family member 2
gga-miR-138-5p	424306	ZEB2	XM_422151	zinc finger E-box binding homeobox 2
gga-miR-138-5p	421178	KIF21B	XM_004934814	kinesin family member 21B
gga-miR-138-5p	431262	FEM1C	XM_004949686	fem-1 homolog c (C. elegans)
gga-miR-138-5p	428528	DSG4	XM_426082	desmoglein 4
gga-miR-138-5p	421934	KLF11	NM_001006417	Kruppel-like factor 11
gga-miR-138-5p	771172	SH2B2	XM_001234466	SH2B adaptor protein 2
gga-miR-138-5p	418211	SSPN	XM_416438	sarcospan
gga-miR-138-5p	769377	TMEM198	XM_001232636	transmembrane protein 198
gga-miR-1457	428749	RWDD4	XM_001231978	RWD domain containing 4
gga-miR-460b-5p	420661	RBMS3	XM_004939420	RNA binding motif, single stranded interacting protein 3
gga-miR-6706-5p	415684	RFWD3	XM_004944127	ring finger and WD repeat domain 3
gga-miR-6706-5p	425108	TMEM231	XM_004944361	transmembrane protein 231
gga-miR-6706-5p	424092	PLEKHM3	XM_004942641	pleckstrin homology domain containing, family M, member 3
gga-miR-6706-5p	427941	PLXNA4B	XM_004937460	plexin A4, B
gga-miR-6706-5p	422344	TMEM164	NM_001012886	transmembrane protein 164
gga-miR-6706-5p	768825	CDC42SE2	XM_003643016	CDC42 small effector 2
gga-miR-6706-5p	417177	PRRC2B	XM_004945888	proline-rich coiled-coil 2B
gga-miR-6706-5p	419867	RAP1A	XM_417994	RAP1A, member of RAS oncogene family
gga-miR-15c-5p	415931	RBM6	NM_001030588	RNA binding motif protein 6
gga-miR-15c-5p	416960	PISD	XM_004934366	phosphatidylserine decarboxylase
gga-miR-15c-5p	421380	RCOR3	NM_001079727	REST corepressor 3
gga-miR-15c-5p	420261	BAALC	XM_418371	brain and acute leukemia, cytoplasmic
gga-miR-15c-5p	417750	WASL	NM_001199500	Wiskott-Aldrich syndrome-like
gga-miR-15c-5p	423045	WEE1	NM_001031181	WEE1 homolog (S. pombe)
gga-miR-15c-5p	419118	C20H20ORF4	NM_001030844	chromosome 20 open reading frame, human C20orf4
gga-miR-15c-5p	769231	ARHGDIA	NM_001080871	Rho GDP dissociation inhibitor (GDI) alpha
gga-miR-15c-5p	417472	MTMR4	XM_004946415	myotubularin related protein 4
gga-miR-15c-5p	420221	TMEM55A	NM_001277420	transmembrane protein 55A
gga-miR-15c-5p	422955	EXOC6B	XM_420892	exocyst complex component 6B
gga-miR-15c-5p	771454	TMPRSS11E	XM_004941248	transmembrane protease, serine 11E
gga-miR-15c-5p	423865	ARL3	XM_004942237	ADP-ribosylation factor-like 3
gga-miR-15c-5p	431645	MOBKL2B	XM_004949594	MOB1, Mps One Binder kinase activator-like 2B (yeast)
gga-miR-15c-5p	420571	DYNC1I1	XM_004939317	dynein, cytoplasmic 1, intermediate chain 1
gga-miR-15c-5p	416481	WIPI2	NM_001006162	WD repeat domain, phosphoinositide interacting 2
gga-miR-15c-5p	426769	ERLIN2	XM_424380	ER lipid raft associated 2
gga-miR-15c-5p	772164	PANX1	XM_001235338	pannexin 1
gga-miR-15c-5p	422314	FAM123B	XM_004940780	family with sequence similarity 123B
gga-miR-15c-5p	769288	STOX2	XM_001232531	storkhead box 2
gga-miR-138-5p	423299	STXBP6	NM_001199711	syntaxin binding protein 6 (amisyn)
gga-miR-138-5p	429048	YSK4	XM_426605	YSK4 Sps1/Ste20-related kinase homolog (S. cerevisiae)
gga-miR-138-5p	100859886	SEH1L	XM_004939715	SEH1-like (S. cerevisiae)
gga-miR-138-5p	770334	PSD3	XM_004949348	pleckstrin and Sec7 domain containing 3
gga-miR-138-5p	420737	AOAH	XM_004939531	acyloxyacyl hydrolase (neutrophil)
gga-miR-138-5p	416348	RBM27	XM_004945044	RNA binding motif protein 27
gga-miR-138-5p	419604	PDIK1L	XM_001232837	PDLIM1 interacting kinase 1 like
gga-miR-138-5p	427605	PSD2	XM_003642040	pleckstrin and Sec7 domain containing 2
gga-miR-138-5p	421199	BCL11A	NM_001031031	B-cell CLL/lymphoma 11A (zinc finger protein)
gga-miR-138-5p	101751856	LOC101751856	XM_004945053	uncharacterized LOC101751856
gga-miR-1457	427218	TNPO1	XM_004937368	transportin 1
gga-miR-460b-5p	427997	CNKSR2	XM_004934667	connector enhancer of kinase suppressor of Ras 2
gga-miR-6706-5p	415732	ADCY7	XM_414097	adenylate cyclase 7
gga-miR-6706-5p	424697	AK4	XM_422526	adenylate kinase 4
gga-miR-6706-5p	418966	KDELC2	XM_003640565	KDEL (Lys-Asp-Glu-Leu) containing 2
gga-miR-6706-5p	424922	LRCH3	XM_422732	leucine-rich repeats and calponin homology (CH) domain containing 3
gga-miR-6706-5p	395508	TCF7L2	NM_001206510	transcription factor 7-like 2 (T-cell specific, HMG-box)
gga-miR-6706-5p	416282	TBC1D9B	XM_414602	TBC1 domain family, member 9B (with GRAM domain)
gga-miR-6706-5p	423172	CD82	NM_001008470	CD82 molecule
gga-miR-6706-5p	421381	KCNH1	XM_419440	potassium voltage-gated channel, subfamily H (eag-related), member 1
gga-miR-6706-5p	374259	CACNB4	NM_204344	calcium channel, voltage-dependent, beta 4 subunit
gga-miR-6706-5p	416895	SVOP	XM_415186	SV2 related protein homolog (rat)
gga-miR-15c-5p	420159	DPP9	XM_418272	dipeptidyl-peptidase 9
gga-miR-15c-5p	423099	TOLLIP	NM_001006471	toll interacting protein
gga-miR-15c-5p	418192	GOLT1B	XM_416423	golgi transport 1B
gga-miR-15c-5p	428401	ALS2CL	XM_004939098	ALS2 C-terminal like
gga-miR-15c-5p	424341	STXBP3	NM_001079734	syntaxin binding protein 3
gga-miR-15c-5p	418516	HLCS	XM_004934539	holocarboxylase synthetase (biotin-(proprionyl-CoA-carboxylase (ATP-hydrolysing)) ligase)
gga-miR-15c-5p	422809	LGI2	NM_001257316	leucine-rich repeat LGI family, member 2
gga-miR-15c-5p	423816	CPEB3	XM_004942160	cytoplasmic polyadenylation element binding protein 3
gga-miR-15c-5p	424920	KIAA0226	XM_004943357	KIAA0226
gga-miR-15c-5p	415369	USP3	XM_004943739	ubiquitin specific peptidase 3
gga-miR-15c-5p	396436	PTH	NM_205452	parathyroid hormone
gga-miR-15c-5p	415881	PHLPP2	XM_414238	PH domain and leucine rich repeat protein phosphatase 2
gga-miR-15c-5p	769717	LOC769717	XM_003642323	PKHD domain-containing transmembrane protein C17orf101-like
gga-miR-15c-5p	417853	PTPRB	XM_416095	protein tyrosine phosphatase, receptor type, B
gga-miR-15c-5p	422493	SLC20A2	NM_001031133	solute carrier family 20 (phosphate transporter), member 2
gga-miR-15c-5p	421096	RNF138	XM_004939823	ring finger protein 138, E3 ubiquitin protein ligase
gga-miR-15c-5p	419656	KPNA6	NM_001012841	karyopherin alpha 6 (importin alpha 7)
gga-miR-15c-5p	769965	KLC4	XM_004940151	kinesin light chain 4
gga-miR-1701	417818	MON2	NM_001199605	MON2 homolog (S. cerevisiae)
gga-miR-1701	421266	CNRIP1	NM_001277530	cannabinoid receptor interacting protein 1
gga-miR-6581-5p	420563	BET1	NM_001199678	blocked early in transport 1 homolog (S. cerevisiae)
gga-miR-6581-5p	418760	ANKRD10	NM_001030815	ankyrin repeat domain 10
gga-miR-6581-5p	415422	TMOD2	XM_004943795	tropomodulin 2 (neuronal)
gga-miR-138-5p	423639	FAM149B1	XM_421523	family with sequence similarity 149, member B1
gga-miR-138-5p	395475	KANK1	XM_004949057	KN motif and ankyrin repeat domains 1
gga-miR-138-5p	426934	PANX2	XM_004937510	pannexin 2
gga-miR-138-5p	428559	CRLS1	XM_426115	cardiolipin synthase 1
gga-miR-138-5p	416357	LOC416357	XM_429421	uncharacterized LOC416357
gga-miR-138-5p	420188	TMEM70	NM_001012848	transmembrane protein 70
gga-miR-6706-5p	428155	RSPO4	XM_004947142	R-spondin 4
gga-miR-6706-5p	428780	TMEM165	XM_426336	transmembrane protein 165
gga-miR-6706-5p	417089	RALGPS1	XM_415375	Ral GEF with PH domain and SH3 binding motif 1
gga-miR-6706-5p	421259	LOC421259	XM_429829	MACRO domain-containing protein 2-like
gga-miR-6706-5p	417591	GOSR1	NM_001006222	golgi SNAP receptor complex member 1
gga-miR-6706-5p	395822	NEO1	XM_004943657	neogenin 1
gga-miR-15c-5p	374136	IL1RL1	NM_204275	interleukin 1 receptor-like 1
gga-miR-15c-5p	416431	USP42	XM_004945087	ubiquitin specific peptidase 42
gga-miR-15c-5p	419127	CHD6	XM_004946876	chromodomain helicase DNA binding protein 6
gga-miR-15c-5p	426813	GRAMD3	XM_004949691	GRAM domain containing 3
gga-miR-15c-5p	418403	NXPE3	XM_416618	neurexophilin and PC-esterase domain family, member 3
gga-miR-15c-5p	419188	TOMM34	XM_417366	translocase of outer mitochondrial membrane 34
gga-miR-15c-5p	417590	CPD	XM_004946643	carboxypeptidase D
gga-miR-15c-5p	100859913	FAM110C	XM_003641047	family with sequence similarity 110, member C
gga-miR-15c-5p	423545	C5H14ORF37	XM_004936465	chromosome 5 open reading frame, human C14orf37
gga-miR-15c-5p	415877	IST1	XM_414234	increased sodium tolerance 1 homolog (yeast)
gga-miR-15c-5p	428991	JAKMIP3	XM_004942374	Janus kinase and microtubule interacting protein 3
gga-miR-15c-5p	424706	SERBP1	NM_001031293	SERPINE1 mRNA binding protein 1
gga-miR-15c-5p	420426	GORASP1	NM_001030963	golgi reassembly stacking protein 1, 65kDa
gga-miR-15c-5p	426284	TBL1XR1	NM_001031369	transducin (beta)-like 1 X-linked receptor 1
gga-miR-15c-5p	422614	PPM1K	XM_420574	protein phosphatase, Mg2+/Mn2+ dependent, 1K
gga-miR-15c-5p	422496	HSPA4L	NM_001012576	heat shock 70kDa protein 4-like
gga-miR-15c-5p	417897	NUDT4	XM_416139	nudix (nucleoside diphosphate linked moiety X)-type motif 4
gga-miR-1701	424055	ANKRD44	NM_001012915	ankyrin repeat domain 44
gga-miR-1628	421458	FAM98A	NM_001031057	family with sequence similarity 98, member A
gga-miR-1628	416844	KDM2B	XM_004945562	lysine (K)-specific demethylase 2B
gga-miR-138-5p	428175	KLHL21	XM_003642517	kelch-like 21 (Drosophila)
gga-miR-138-5p	396062	CD3E	NM_206904	CD3e molecule, epsilon (CD3-TCR complex)
gga-miR-138-5p	417643	BCAS3	XM_004946733	breast carcinoma amplified sequence 3
gga-miR-138-5p	415603	MCC	XM_004949277	mutated in colorectal cancers
gga-miR-138-5p	419900	UHRF1BP1	XM_004935043	UHRF1 binding protein 1
gga-miR-138-5p	396393	LCN8	NM_205422	lipocalin 8
gga-miR-138-5p	417777	TMEM168	XM_416021	transmembrane protein 168
gga-miR-138-5p	416065	PXK	XM_414403	PX domain containing serine/threonine kinase
gga-miR-138-5p	100857885	KIAA1549	XM_004937850	KIAA1549
gga-miR-138-5p	422109	NAT9	XM_004946352	N-acetyltransferase 9 (GCN5-related, putative)
gga-miR-1457	396359	SYNPR	NM_205394	synaptoporin
gga-miR-1457	769515	ARL15	XM_004937233	ADP-ribosylation factor-like 15
gga-miR-1457	770158	ELAVL2	XM_004949550	ELAV (embryonic lethal, abnormal vision, Drosophila)-like 2 (Hu antigen B)
gga-miR-1457	417093	PBX3	NM_001030678	pre-B-cell leukemia homeobox 3
gga-miR-1457	422686	NDST4	XM_420638	N-deacetylase/N-sulfotransferase (heparan glucosaminyl) 4
gga-miR-1457	771589	ITPRIPL2	XM_003642123	inositol 1,4,5-trisphosphate receptor interacting protein-like 2
gga-miR-460b-5p	419552	LAPTM5	XM_004947679	lysosomal protein transmembrane 5
gga-miR-460b-5p	427504	BNC1	XM_004943823	basonuclin 1
gga-miR-460b-5p	395755	PODXL	NM_001271894	podocalyxin-like
gga-miR-6706-5p	425441	LOC425441	XM_423203	electroneutral sodium bicarbonate exchanger 1-like
gga-miR-6706-5p	428474	PQLC1	XM_426032	PQ loop repeat containing 1
gga-miR-6706-5p	770350	ZNF384	NM_001079496	zinc finger protein 384
gga-miR-6706-5p	418074	NUAK1	XM_416310	NUAK family, SNF1-like kinase, 1
gga-miR-6706-5p	422832	CPEB2	XM_004936160	cytoplasmic polyadenylation element binding protein 2
gga-miR-6706-5p	418172	BPGM	NM_001030768	2,3-bisphosphoglycerate mutase
gga-miR-6706-5p	419886	CSDE1	NM_001030918	cold shock domain containing E1, RNA-binding
gga-miR-6706-5p	373923	CELF1	NM_001012521	CUGBP, Elav-like family member 1
gga-miR-15c-5p	771278	MED26	XM_004948934	mediator complex subunit 26
gga-miR-15c-5p	424118	SSFA2	XM_003641579	sperm specific antigen 2
gga-miR-15c-5p	421766	SESN1	XM_004940331	sestrin 1
gga-miR-15c-5p	418588	TAB3	XM_416787	TGF-beta activated kinase 1/MAP3K7 binding protein 3
gga-miR-15c-5p	420749	KBTBD2	XM_004939541	kelch repeat and BTB (POZ) domain containing 2
gga-miR-15c-5p	421796	PNISR	NM_001031080	PNN-interacting serine/arginine-rich protein
gga-miR-15c-5p	418797	SLITRK6	XM_003640550	SLIT and NTRK-like family, member 6
gga-miR-15c-5p	418357	CLDND1	NM_001012820	claudin domain containing 1
gga-miR-15c-5p	418580	DYNLT3	NM_001277734	dynein, light chain, Tctex-type 3
gga-miR-15c-5p	424751	MYO7B	XM_003641743	myosin VIIB
gga-miR-15c-5p	427091	SLC25A42	XM_004948898	solute carrier family 25, member 42
gga-miR-15c-5p	420345	WDYHV1	XM_004940028	WDYHV motif containing 1
gga-miR-15c-5p	374076	SIAH1	XM_414105	seven in absentia homolog 1 (Drosophila)
gga-miR-15c-5p	423589	PLEKHC1	XM_001235202	pleckstrin homology domain containing, family C (with FERM domain) member 1
gga-miR-15c-5p	395801	IHH	NM_204957	Indian hedgehog
gga-miR-1701	423696	VPS26A	XM_421577	vacuolar protein sorting 26 homolog A (S. pombe)
gga-miR-6581-5p	419444	PIK3CD	NM_001012696	phosphoinositide-3-kinase, catalytic, delta polypeptide
gga-miR-138-5p	416416	RSL1D1	NM_001039263	ribosomal L1 domain containing 1
gga-miR-138-5p	100858092	LOC100858092	XM_004935170	sodium-dependent neutral amino acid transporter B(0)AT3-like
gga-miR-138-5p	419662	LOC419662	XM_004947846	zinc finger and BTB domain containing 8A-like
gga-miR-138-5p	423655	JMJD1C	NM_001199546	jumonji domain containing 1C
gga-miR-138-5p	417853	PTPRB	XM_416095	protein tyrosine phosphatase, receptor type, B
gga-miR-138-5p	101749109	LOC101749109	XM_004948576	uncharacterized LOC101749109
gga-miR-138-5p	100859235	LOC100859235	XM_003642915	transmembrane protein C9orf71 homolog
gga-miR-138-5p	419277	DUSP15	XM_417451	dual specificity phosphatase 15
gga-miR-138-5p	417972	GBE	NM_001008786	eye-globin
gga-miR-138-5p	396292	COL6A2	NM_205348	collagen, type VI, alpha 2
gga-miR-138-5p	428942	MCU	XM_426497	mitochondrial calcium uniporter
gga-miR-138-5p	415422	TMOD2	XM_004943795	tropomodulin 2 (neuronal)
gga-miR-138-5p	770488	PDGFRB	XM_001233829	platelet-derived growth factor receptor, beta polypeptide
gga-miR-1457	425972	PDK1	NM_001031352	pyruvate dehydrogenase kinase, isozyme 1
gga-miR-1457	428570	SOCS5	NM_001127314	suppressor of cytokine signaling 5
gga-miR-1457	770846	SFR1	XM_001234167	MEI5 meiotic recombination protein homolog (S. cerevisiae)
gga-miR-1457	429208	DNAJC16	NM_001039330	DnaJ (Hsp40) homolog, subfamily C, member 16
gga-miR-1457	396195	SRSF2	NM_001001305	serine/arginine-rich splicing factor 2
gga-miR-1457	100859744	RASGEF1B	XM_003641169	RasGEF domain family, member 1B
gga-miR-6706-5p	429269	MKNK2	XM_426826	MAP kinase interacting serine/threonine kinase 2
gga-miR-6706-5p	422514	HERC3	NM_001039298	hect domain and RLD 3
gga-miR-6706-5p	395405	TWIST2	NM_204679	twist homolog 2 (Drosophila)
gga-miR-6706-5p	415374	TLN2	XM_004943745	talin 2
gga-miR-6706-5p	418368	SLC35A5	XM_416587	solute carrier family 35, member A5
gga-miR-6706-5p	424831	ITM2C	NM_001277418	integral membrane protein 2C
gga-miR-15c-5p	418012	SMCR7L	XM_416248	Smith-Magenis syndrome chromosome region, candidate 7-like
gga-miR-15c-5p	100859886	SEH1L	XM_004939715	SEH1-like (S. cerevisiae)
gga-miR-15c-5p	416598	FOPNL	NM_001006170	FGFR1OP N-terminal like
gga-miR-15c-5p	424698	DNAJC6	NM_001177415	DnaJ (Hsp40) homolog, subfamily C, member 6
gga-miR-15c-5p	427356	ZDHHC21	NM_001031438	zinc finger, DHHC-type containing 21
gga-miR-15c-5p	374137	MEOX2	NM_001005427	mesenchyme homeobox 2
gga-miR-15c-5p	424158	ZNF650	XM_004942750	zinc finger protein 650
gga-miR-15c-5p	416955	YWHAH	NM_001007839	tyrosine 3-monooxygenase/tryptophan 5-monooxygenase activation protein, eta polypeptide
gga-miR-15c-5p	422832	CPEB2	XM_004936160	cytoplasmic polyadenylation element binding protein 2
gga-miR-15c-5p	416580	USP31	XM_003642146	ubiquitin specific peptidase 31
gga-miR-15c-5p	415362	IDH3A	NM_001005808	isocitrate dehydrogenase 3 (NAD+) alpha
gga-miR-15c-5p	420581	ICA1	XM_004939321	islet cell autoantigen 1, 69kDa
gga-miR-15c-5p	417745	SELO	NM_001115017	selenoprotein O
gga-miR-15c-5p	395380	CD164	XM_426183	CD164 molecule, sialomucin
gga-miR-15c-5p	419505	ZBTB40	XM_417655	zinc finger and BTB domain containing 40
gga-miR-15c-5p	427140	IL31RA	XM_004937246	interleukin 31 receptor A
gga-miR-1701	418184	AEBP2	XM_416415	AE binding protein 2
gga-miR-1701	424876	MAP3K13	XM_422689	mitogen-activated protein kinase kinase kinase 13
gga-miR-1701	416167	WWC1	NM_001277150	WW and C2 domain containing 1
gga-miR-1701	373935	DACH1	NM_001199446	dachshund homolog 1 (Drosophila)
gga-miR-1628	418617	REPS2	NM_001030806	RALBP1 associated Eps domain containing 2
gga-miR-1628	415960	SLC6A1	XM_414303	solute carrier family 6 (neurotransmitter transporter, GABA), member 1
gga-miR-138-5p	418059	HMGXB4	XM_416295	HMG box domain containing 4
gga-miR-138-5p	416957	PRR14L	XM_004934356	proline rich 14-like
gga-miR-138-5p	421422	DAAM2	XM_419476	dishevelled associated activator of morphogenesis 2
gga-miR-138-5p	415493	ABHD2	XM_004943846	abhydrolase domain containing 2
gga-miR-138-5p	419035	LOC419035	XM_004937490	FERM domain-containing protein 4A-like
gga-miR-138-5p	418123	CREB3L2	XM_416356	cAMP responsive element binding protein 3-like 2
gga-miR-138-5p	395391	SNCB	NM_204671	synuclein, beta
gga-miR-138-5p	427871	ALX1	XM_425445	ALX homeobox 1
gga-miR-138-5p	427839	KSR1	XM_425413	kinase suppressor of ras 1
gga-miR-138-5p	395195	NBEA	NM_001252140	neurobeachin
gga-miR-138-5p	768996	TACR2	XM_004942006	tachykinin receptor 2
gga-miR-138-5p	415349	PSTPIP1	XM_413733	proline-serine-threonine phosphatase interacting protein 1
gga-miR-138-5p	396091	ATIC	NM_205178	5-aminoimidazole-4-carboxamide ribonucleotide formyltransferase/IMP cyclohydrolase
gga-miR-138-5p	425867	BRUNOL5	XM_423569	bruno-like 5, RNA binding protein (Drosophila)
gga-miR-1457	428447	ENTPD3	XM_426007	ectonucleoside triphosphate diphosphohydrolase 3
gga-miR-460b-5p	417830	TBC1D30	XM_416071	TBC1 domain family, member 30
gga-miR-460b-5p	416625	DAGLB	NM_001030643	diacylglycerol lipase, beta
gga-miR-460b-5p	427236	DENND4C	XM_004949127	DENN/MADD domain containing 4C
gga-miR-6706-5p	396341	CCND1	NM_205381	cyclin D1
gga-miR-6706-5p	422688	CAMK2D	NM_001039300	calcium/calmodulin-dependent protein kinase II delta
gga-miR-6706-5p	423316	EGLN3	XM_421233	egl nine homolog 3 (C. elegans)
gga-miR-6706-5p	416622	LOC416622	XM_004945298	transmembrane protein 180-like
gga-miR-6706-5p	421383	SERTAD4	XM_419442	SERTA domain containing 4
gga-miR-6706-5p	420162	TNFAIP8L1	NM_001006343	tumor necrosis factor, alpha-induced protein 8-like 1
gga-miR-15c-5p	416502	MPRIP	XM_004945187	myosin phosphatase Rho interacting protein
gga-miR-15c-5p	415430	SEMA6D	XM_001231858	sema domain, transmembrane domain (TM), and cytoplasmic domain, (semaphorin) 6D
gga-miR-15c-5p	771980	FAM78A	XM_001233856	family with sequence similarity 78, member A
gga-miR-15c-5p	395436	USPL1	NM_001162393	ubiquitin specific peptidase like 1
gga-miR-15c-5p	772219	MRM1	XM_001235386	mitochondrial rRNA methyltransferase 1 homolog (S. cerevisiae)
gga-miR-15c-5p	419097	LRP6	XM_417286	low density lipoprotein receptor-related protein 6
gga-miR-15c-5p	423612	GLUD1	XM_421497	glutamate dehydrogenase 1
gga-miR-15c-5p	423817	BTAF1	XM_421689	BTAF1 RNA polymerase II, B-TFIID transcription factor-associated, 170kDa (Mot1 homolog, S. cerevisiae)
gga-miR-15c-5p	395517	TBPL1	NM_204755	TBP-like 1
gga-miR-15c-5p	418565	CASK	XM_416769	calcium/calmodulin-dependent serine protein kinase (MAGUK family)
gga-miR-15c-5p	419857	PLXNA2	XM_004934978	plexin A2
gga-miR-15c-5p	429129	SPSB4	XM_426685	splA/ryanodine receptor domain and SOCS box containing 4
gga-miR-15c-5p	417406	SUZ12	XM_415658	suppressor of zeste 12 homolog (Drosophila)
gga-miR-15c-5p	428847	TMEM86A	XM_426403	transmembrane protein 86A
gga-miR-15c-5p	424289	CCNT2	XM_004942991	cyclin T2
gga-miR-1628	423816	CPEB3	XM_004942160	cytoplasmic polyadenylation element binding protein 3
gga-miR-138-5p	100857605	RNF24	XM_003641262	ring finger protein 24
gga-miR-138-5p	416671	DNAJA3	XM_414967	DnaJ (Hsp40) homolog, subfamily A, member 3
gga-miR-138-5p	421877	PTP4A1	NM_001008461	protein tyrosine phosphatase type IVA, member 1
gga-miR-138-5p	426866	NME6	XM_424474	NME/NM23 nucleoside diphosphate kinase 6
gga-miR-138-5p	772219	MRM1	XM_001235386	mitochondrial rRNA methyltransferase 1 homolog (S. cerevisiae)
gga-miR-138-5p	424152	CYBRD1	XM_421999	cytochrome b reductase 1
gga-miR-138-5p	419417	GLTPD1	XM_417578	glycolipid transfer protein domain containing 1
gga-miR-138-5p	418772	TMTC4	XM_416968	transmembrane and tetratricopeptide repeat containing 4
gga-miR-138-5p	419248	PCMTD2	XM_003642484	protein-L-isoaspartate (D-aspartate) O-methyltransferase domain containing 2
gga-miR-138-5p	428805	FBXO41	XM_004936289	F-box protein 41
gga-miR-138-5p	415504	SLCO3A1	XM_413876	solute carrier organic anion transporter family, member 3A1
gga-miR-1457	427301	SLC44A1	XM_003643040	solute carrier family 44, member 1
gga-miR-1457	422456	GAB1	XM_001232601	GRB2-associated binding protein 1
gga-miR-1457	415486	PEX11A	XM_004943838	peroxisomal biogenesis factor 11 alpha
gga-miR-460b-5p	428677	LUC7L3	NM_001031530	LUC7-like 3 (S. cerevisiae)
gga-miR-6706-5p	418935	RNF6	XM_004938787	ring finger protein (C3H2C3 type) 6
gga-miR-6706-5p	418726	FHL2	XM_416924	four and a half LIM domains 2
gga-miR-6706-5p	428837	PAK6	XM_426393	p21 protein (Cdc42/Rac)-activated kinase 6
gga-miR-6706-5p	416803	GPR133	XM_415094	G protein-coupled receptor 133
gga-miR-6706-5p	100857974	ONECUT2	XM_003642903	one cut homeobox 2
gga-miR-6706-5p	423047	TMEM41B	NM_001008469	transmembrane protein 41B
gga-miR-6706-5p	424187	DPP4	NM_001031255	dipeptidyl-peptidase 4
gga-miR-6706-5p	416918	XBP1	NM_001006192	X-box binding protein 1
gga-miR-6706-5p	404746	ST6GALNAC3	XM_422394	ST6 (alpha-N-acetyl-neuraminyl-2,3-beta-galactosyl-1,3)-N-acetylgalactosaminide alpha-2,6-sialyltransferase 3
gga-miR-6706-5p	396195	SRSF2	NM_001001305	serine/arginine-rich splicing factor 2
gga-miR-15c-5p	424780	TFDP2	NM_001184713	transcription factor Dp-2 (E2F dimerization partner 2)
gga-miR-15c-5p	429070	ASTN1	XM_004943259	astrotactin 1
gga-miR-15c-5p	420056	SPPL2B	NM_001030933	signal peptide peptidase like 2B
gga-miR-15c-5p	425541	DDI2	XM_423293	DNA-damage inducible 1 homolog 2 (S. cerevisiae)
gga-miR-15c-5p	423628	MAT1A	NM_001199519	methionine adenosyltransferase I, alpha
gga-miR-15c-5p	420347	ZHX1	XM_004940025	zinc fingers and homeoboxes 1
gga-miR-15c-5p	419489	MTHFR	XM_417645	methylenetetrahydrofolate reductase (NAD(P)H)
gga-miR-15c-5p	417529	RFFL	NM_001030711	ring finger and FYVE-like domain containing E3 ubiquitin protein ligase
gga-miR-15c-5p	100858827	LOC100858827	XM_003642006	cAMP-dependent protein kinase type II-alpha regulatory subunit-like
gga-miR-15c-5p	421028	DSEL	XM_004935223	dermatan sulfate epimerase-like
gga-miR-15c-5p	420007	NBR1	XM_418128	neighbor of BRCA1 gene 1
gga-miR-15c-5p	427592	LRIG1	XM_425165	leucine-rich repeats and immunoglobulin-like domains 1
gga-miR-15c-5p	416112	GRM7	XM_004944718	glutamate receptor, metabotropic 7
gga-miR-15c-5p	419898	ANKS1A	XM_004935039	ankyrin repeat and sterile alpha motif domain containing 1A
gga-miR-15c-5p	416519	SMCR8	XM_004945206	Smith-Magenis syndrome chromosome region, candidate 8
gga-miR-15c-5p	100857368	ZCCHC6	NM_001271947	zinc finger, CCHC domain containing 6
gga-miR-15c-5p	428586	LOC428586	XM_003640952	mitogen-activated protein kinase kinase kinase MLK4-like
gga-miR-15c-5p	428121	LRRC32	XM_425678	leucine rich repeat containing 32
gga-miR-15c-5p	428309	CNTNAP1	XM_003642826	contactin associated protein 1
gga-miR-15c-5p	420750	AVL9	XM_418848	AVL9 homolog (S. cerevisiase)
gga-miR-15c-5p	420133	INSR	XM_001233398	insulin receptor
gga-miR-15c-5p	424385	C8H1ORF9	XM_004943185	chromosome 8 open reading frame, human C1orf9
gga-miR-1701	423734	KAT6B	XM_004942071	K(lysine) acetyltransferase 6B
gga-miR-1701	424554	ZZZ3	XM_004936675	zinc finger, ZZ-type containing 3
gga-miR-1701	421324	WDR26	XM_419389	WD repeat domain 26
gga-miR-1628	374224	PAFAH1B1	NM_204324	platelet-activating factor acetylhydrolase 1b, regulatory subunit 1 (45kDa)
gga-miR-1628	395400	BAZ2B	NM_204677	bromodomain adjacent to zinc finger domain, 2B
gga-miR-138-5p	420023	EZH1	XM_004948621	enhancer of zeste homolog 1 (Drosophila)
gga-miR-138-5p	770173	KCNS1	XM_004947028	potassium voltage-gated channel, delayed-rectifier, subfamily S, member 1
gga-miR-138-5p	419301	WFDC8	XM_417473	WAP four-disulfide core domain 8
gga-miR-138-5p	427280	SHB	XM_424863	Src homology 2 domain containing adaptor protein B
gga-miR-138-5p	771080	FAM163A	XM_004943229	family with sequence similarity 163, member A
gga-miR-138-5p	430099	LOC430099	XM_427657	synaptonemal complex protein SC65-like
gga-miR-138-5p	427649	IGFALS	XM_004945405	insulin-like growth factor binding protein, acid labile subunit
gga-miR-138-5p	418173	RERG	XM_416404	RAS-like, estrogen-regulated, growth inhibitor
gga-miR-138-5p	396311	ANK1	XM_424401	ankyrin 1, erythrocytic
gga-miR-138-5p	419704	SLC37A2	XM_004947929	solute carrier family 37 (glycerol-3-phosphate transporter), member 2
gga-miR-138-5p	423142	ORAOV1	NM_001031186	oral cancer overexpressed 1
gga-miR-138-5p	417151	C17H9ORF7	NM_001277657	chromosome 17 open reading frame, human C9orf7
gga-miR-138-5p	423032	USP47	NM_001199582	ubiquitin specific peptidase 47
gga-miR-1457	422161	YIPF6	XM_420160	Yip1 domain family, member 6
gga-miR-1457	424001	MAP2	XM_004942441	microtubule-associated protein 2
gga-miR-1457	422762	DCUN1D4	XM_003641235	DCN1, defective in cullin neddylation 1, domain containing 4 (S. cerevisiae)
gga-miR-1457	424808	SCG2	XM_422624	secretogranin II
gga-miR-1457	378919	TRIB2	NM_204401	tribbles homolog 2 (Drosophila)
gga-miR-1457	427335	UGCG	XM_424914	UDP-glucose ceramide glucosyltransferase
gga-miR-6653-3p	422249	LOC422249	NM_001039296	transmembrane 9 superfamily member 2-like
gga-miR-460b-5p	424555	AK5	XM_004936677	adenylate kinase 5
gga-miR-6706-5p	415430	SEMA6D	XM_001231858	sema domain, transmembrane domain (TM), and cytoplasmic domain, (semaphorin) 6D
gga-miR-6706-5p	419159	SOGA1	XM_004946982	suppressor of glucose, autophagy associated 1
gga-miR-6706-5p	395995	TBP	NM_205103	TATA box binding protein
gga-miR-6706-5p	426942	DDA1	NM_001031408	DET1 and DDB1 associated 1
gga-miR-6706-5p	423924	RAB11FIP2	XM_421784	RAB11 family interacting protein 2 (class I)
gga-miR-6706-5p	423014	PLCB2	XM_420945	phospholipase C, beta 2
gga-miR-6706-5p	427493	KLF13	XM_425065	Kruppel-like factor 13
gga-miR-6706-5p	378804	PPP3R1	NM_204376	protein phosphatase 3, regulatory subunit B, alpha
gga-miR-6706-5p	395784	CLIP1	NM_204942	CAP-GLY domain containing linker protein 1
gga-miR-6706-5p	427091	SLC25A42	XM_004948898	solute carrier family 25, member 42
gga-miR-6706-5p	420444	RBM33	XM_004939156	RNA binding motif protein 33
gga-miR-15c-5p	421472	FEZ2	XM_419521	fasciculation and elongation protein zeta 2 (zygin II)
gga-miR-15c-5p	427338	SVEP1	XM_424917	sushi, von Willebrand factor type A, EGF and pentraxin domain containing 1
gga-miR-15c-5p	417627	PPM1E	XM_415871	protein phosphatase, Mg2+/Mn2+ dependent, 1E
gga-miR-15c-5p	416173	KCNIP1	XM_004944780	Kv channel interacting protein 1
gga-miR-15c-5p	420467	CUL2	NM_001030970	cullin 2
gga-miR-15c-5p	420675	SNRK	NM_001199702	SNF related kinase
gga-miR-15c-5p	416877	ATXN2	XM_415169	ataxin 2
gga-miR-15c-5p	420550	ANKIB1	XM_418652	ankyrin repeat and IBR domain containing 1
gga-miR-15c-5p	426017	DAGLA	XM_423696	diacylglycerol lipase, alpha
gga-miR-15c-5p	424898	ATP13A3	XM_004943327	ATPase type 13A3
gga-miR-15c-5p	424225	MAP3K2	XM_422075	mitogen-activated protein kinase kinase kinase 2
gga-miR-15c-5p	427351	RFX3	XM_004949059	regulatory factor X, 3 (influences HLA class II expression)
gga-miR-15c-5p	423208	DLL4	XM_004941616	delta-like 4 (Drosophila)
gga-miR-15c-5p	427850	RELN	XM_425424	reelin
gga-miR-15c-5p	419543	DHDDS	XM_004947660	dehydrodolichyl diphosphate synthase
gga-miR-15c-5p	768655	PIM3	XM_003640342	pim-3 oncogene
gga-miR-15c-5p	100859653	LOC100859653	XM_004944392	6-phosphofructo-2-kinase/fructose-2,6-biphosphatase 4-like
gga-miR-15c-5p	416588	PDPK1	NM_001012529	3-phosphoinositide dependent protein kinase-1
gga-miR-1628	395968	ICOSLG	NM_205084	inducible T-cell co-stimulator ligand
gga-miR-138-5p	101750960	LOC101750960	XM_004941762	extensin-like
gga-miR-138-5p	427566	ATXN1L	XM_425139	ataxin 1-like
gga-miR-138-5p	418022	GTPBP1	NM_001201447	GTP binding protein 1
gga-miR-138-5p	416260	GALNT10	XM_004944936	UDP-N-acetyl-alpha-D-galactosamine:polypeptide N-acetylgalactosaminyltransferase 10 (GalNAc-T10)
gga-miR-138-5p	427400	LOC427400	XM_004937100	uncharacterized LOC427400
gga-miR-138-5p	426049	CTSG	XM_423728	cathepsin G
gga-miR-138-5p	423760	PSD	XM_004942103	pleckstrin and Sec7 domain containing
gga-miR-1457	422176	ZC4H2	XM_004940522	zinc finger, C4H2 domain containing
gga-miR-1457	416847	TMEM120B	NM_001030659	transmembrane protein 120B
gga-miR-1457	395194	TLN1	NM_204523	talin 1
gga-miR-1457	424281	SLC35F5	XM_004942979	solute carrier family 35, member F5
gga-miR-460b-5p	424504	KIAA1107	XM_004936602	KIAA1107
gga-miR-6706-5p	395330	PTPRJ	NM_204621	protein tyrosine phosphatase, receptor type, J
gga-miR-6706-5p	422123	SLC25A19	XM_004946368	solute carrier family 25 (mitochondrial thiamine pyrophosphate carrier), member 19
gga-miR-6706-5p	423884	SORCS3	XM_421749	sortilin-related VPS10 domain containing receptor 3
gga-miR-6706-5p	423216	LTK	XM_421140	leukocyte receptor tyrosine kinase
gga-miR-6706-5p	422085	CYTH1	NM_001031105	cytohesin 1
gga-miR-6706-5p	768717	NUMA1	NM_001190925	nuclear mitotic apparatus protein 1
gga-miR-6706-5p	768886	TMEM174	NM_001282271	transmembrane protein 174
gga-miR-6706-5p	422536	GSTCD	XM_004941049	glutathione S-transferase, C-terminal domain containing
gga-miR-6706-5p	422703	EIF4E	XM_420655	eukaryotic translation initiation factor 4E
gga-miR-6706-5p	418329	RABL3	NM_001030780	RAB, member of RAS oncogene family-like 3
gga-miR-6706-5p	422893	NAT8L	XM_420835	N-acetyltransferase 8-like (GCN5-related, putative)
gga-miR-6706-5p	422906	LOC422906	XM_004936235	transmembrane emp24 protein transport domain containing 9-like
gga-miR-15c-5p	424476	LPPR4	XM_004936567	lipid phosphate phosphatase-related protein type 4
gga-miR-15c-5p	427203	ENC1	XM_004937361	ectodermal-neural cortex 1 (with BTB-like domain)
gga-miR-15c-5p	424369	UHMK1	XM_422213	U2AF homology motif (UHM) kinase 1
gga-miR-15c-5p	423846	ARHGAP19	NM_001012909	Rho GTPase activating protein 19
gga-miR-15c-5p	415588	MAP1A	XM_003641838	microtubule-associated protein 1A
gga-miR-15c-5p	418962	ARHGAP20	XM_417154	Rho GTPase activating protein 20
gga-miR-15c-5p	395166	FAT4	XM_420617	FAT tumor suppressor homolog 4 (Drosophila)
gga-miR-15c-5p	419658	BSDC1	NM_001012842	BSD domain containing 1
gga-miR-15c-5p	425291	PI4K2A	XM_423069	phosphatidylinositol 4-kinase type 2 alpha
gga-miR-15c-5p	421467	NANP	NM_001031059	N-acetylneuraminic acid phosphatase
gga-miR-15c-5p	420273	EMC2	NM_001198680	ER membrane protein complex subunit 2
gga-miR-15c-5p	422446	SCOC	NM_001114852	short coiled-coil protein
gga-miR-15c-5p	395133	SGK1	NM_204476	serum/glucocorticoid regulated kinase 1
gga-miR-15c-5p	421288	FOXN2	NM_001039284	forkhead box N2
gga-miR-15c-5p	404538	POT1	NM_206992	protection of telomeres 1 homolog (S. pombe)
gga-miR-15c-5p	423720	AIFM2	XM_421597	apoptosis-inducing factor, mitochondrion-associated, 2
gga-miR-15c-5p	426582	C15H12orf51	XM_415176	chromosome 15 open reading frame, human C12orf51
gga-miR-15c-5p	420670	C2H3ORF23	NM_001286225	chromosome 2 open reading frame, human C3orf23
gga-miR-15c-5p	424757	UGGT1	XM_004936962	UDP-glucose glycoprotein glucosyltransferase 1
gga-miR-1701	425279	PA2G4	XM_423059	proliferation-associated 2G4, 38kDa
gga-miR-1628	395232	EIF4A2	NM_204549	eukaryotic translation initiation factor 4A2
gga-miR-1628	420289	TRPS1	XM_418402	trichorhinophalangeal syndrome I
gga-miR-6581-5p	423471	TRAF3	XM_004936346	TNF receptor-associated factor 3
gga-miR-6581-5p	416740	ISM1	XM_415036	isthmin 1 homolog (zebrafish)
gga-miR-138-5p	100857401	LOC100857401	XM_004944520	uncharacterized LOC100857401
gga-miR-138-5p	396524	COL9A2	NM_001271988	collagen, type IX, alpha 2
gga-miR-138-5p	419843	SRGAP2	XM_004934955	SLIT-ROBO Rho GTPase activating protein 2
gga-miR-138-5p	421132	IMPAD1	XM_004939865	inositol monophosphatase domain containing 1
gga-miR-138-5p	419633	NCDN	NM_001030901	neurochondrin
gga-miR-138-5p	419661	ZBTB8A	XM_417808	zinc finger and BTB domain containing 8A
gga-miR-138-5p	417345	LOC417345	XM_429498	uncharacterized LOC417345
gga-miR-138-5p	423375	TMED8	NM_001031206	transmembrane emp24 protein transport domain containing 8
gga-miR-138-5p	418549	PDXK	NM_001278084	pyridoxal (pyridoxine, vitamin B6) kinase
gga-miR-1457	423391	SEL1L	XM_421303	sel-1 suppressor of lin-12-like (C. elegans)
gga-miR-1457	416470	TTYH3	XM_414776	tweety homolog 3 (Drosophila)
gga-miR-1457	769007	MEF2C	XM_004949410	myocyte enhancer factor 2C
gga-miR-1457	422854	JAKMIP1	XM_004936175	janus kinase and microtubule interacting protein 1
gga-miR-1457	424385	C8H1ORF9	XM_004943185	chromosome 8 open reading frame, human C1orf9
gga-miR-460b-5p	768782	DPY19L3	XM_001231904	dpy-19-like 3 (C. elegans)
gga-miR-6706-5p	395682	ZFHX3	XM_004944340	zinc finger homeobox 3
gga-miR-6706-5p	419208	NCOA3	XM_004947054	nuclear receptor coactivator 3
gga-miR-6706-5p	422731	MTMR7	XM_420686	myotubularin related protein 7
gga-miR-6706-5p	395671	ERBB4	NM_001030365	v-erb-a erythroblastic leukemia viral oncogene homolog 4
gga-miR-6706-5p	417804	ARID2	XM_416046	AT rich interactive domain 2 (ARID, RFX-like)
gga-miR-15c-5p	100858824	LOC100858824	XM_003641158	toll-like receptor 2 type-1-like
gga-miR-15c-5p	416768	HIC2	NM_001277483	hypermethylated in cancer 2
gga-miR-15c-5p	421679	CCDC28A	XM_419716	coiled-coil domain containing 28A
gga-miR-15c-5p	417771	CAPZA2	NM_001004380	capping protein (actin filament) muscle Z-line, alpha 2
gga-miR-15c-5p	423834	HPSE2	XM_004942175	heparanase 2
gga-miR-15c-5p	396266	RARB	NM_205326	retinoic acid receptor, beta
gga-miR-15c-5p	378782	EPHA1	NM_204360	EPH receptor A1
gga-miR-15c-5p	416030	PLXNA1	XM_414370	plexin A1
gga-miR-15c-5p	428678	ANKRD40	NM_001031531	ankyrin repeat domain 40
gga-miR-15c-5p	430917	COPS2	NM_001031596	COP9 constitutive photomorphogenic homolog subunit 2 (Arabidopsis)
gga-miR-15c-5p	769066	TP53INP2	XM_004946868	tumor protein p53 inducible nuclear protein 2
gga-miR-15c-5p	374251	TGFBR3	NM_204339	transforming growth factor, beta receptor III
gga-miR-15c-5p	426145	SPTLC1	XM_004949252	serine palmitoyltransferase, long chain base subunit 1
gga-miR-1701	427169	MAST4	XM_004937302	microtubule associated serine/threonine kinase family member 4
gga-miR-1628	427262	GNAQ	NM_001031427	guanine nucleotide binding protein (G protein), q polypeptide
gga-miR-1628	416721	CSRP2BP	NM_001199441	CSRP2 binding protein
gga-miR-1628	428133	RBM39	XM_425690	RNA binding motif protein 39
gga-miR-6581-5p	771872	CLDN12	XM_004939280	claudin 12
gga-miR-6581-5p	423187	ARFGAP2	NM_001033871	ADP-ribosylation factor GTPase activating protein 2
gga-miR-138-5p	415761	ZNF536	XM_004944213	zinc finger protein 536
gga-miR-138-5p	422480	PET112	XM_420446	PET112 homolog (yeast)
gga-miR-138-5p	427797	ARHGAP44	XM_004946075	Rho GTPase activating protein 44
gga-miR-138-5p	418452	ADPRH	NM_001030790	ADP-ribosylarginine hydrolase
gga-miR-138-5p	101748058	LOC101748058	XM_004939221	uncharacterized LOC101748058
gga-miR-138-5p	416618	SDR42E2	NM_001195157	short chain dehydrogenase/reductase family 42E, member 2
gga-miR-138-5p	415848	GALNS	XM_414208	galactosamine (N-acetyl)-6-sulfate sulfatase
gga-miR-138-5p	424083	STRADB	XM_421938	STE20-related kinase adaptor beta
gga-miR-138-5p	422998	SYT12	NM_001199512	synaptotagmin XII
gga-miR-138-5p	395069	COL2A1	NM_204426	collagen, type II, alpha 1
gga-miR-138-5p	427660	GRIFIN	NM_001277909	galectin-related inter-fiber protein
gga-miR-138-5p	427637	GLRA1	XM_425210	glycine receptor, alpha 1
gga-miR-138-5p	418939	FAM123A	XM_004938794	family with sequence similarity 123A
gga-miR-1457	426855	WDR7	XM_424464	WD repeat domain 7
gga-miR-1457	420540	STEAP1	XM_418642	six transmembrane epithelial antigen of the prostate 1
gga-miR-1457	424177	GALNT3	XM_422023	UDP-N-acetyl-alpha-D-galactosamine:polypeptide N-acetylgalactosaminyltransferase 3 (GalNAc-T3)
gga-miR-1457	421355	GPATCH2	NM_001031046	G patch domain containing 2
gga-miR-1457	420761	AMPH	NM_001004398	amphiphysin
gga-miR-1457	424889	NCBP2	NM_001277449	nuclear cap binding protein subunit 2, 20kDa
gga-miR-460b-5p	427390	ATG12	XM_004949627	autophagy related 12
gga-miR-460b-5p	771457	FAM73A	XM_001234740	family with sequence similarity 73, member A
gga-miR-460b-5p	427286	CPLX2	XM_424869	complexin 2
gga-miR-6706-5p	423680	A1CF	XM_421561	APOBEC1 complementation factor
gga-miR-6706-5p	421297	ALK	XM_004940187	anaplastic lymphoma receptor tyrosine kinase
gga-miR-6706-5p	395460	TM9SF3	XM_421629	transmembrane 9 superfamily member 3
gga-miR-6706-5p	424365	ATF6	XM_422208	activating transcription factor 6
gga-miR-6706-5p	772061	KCNC2	XM_001235254	potassium voltage-gated channel, Shaw-related subfamily, member 2
gga-miR-6706-5p	417908	FGD6	XM_416149	FYVE, RhoGEF and PH domain containing 6
gga-miR-6706-5p	424974	GNB4	XM_003641774	guanine nucleotide binding protein (G protein), beta polypeptide 4
gga-miR-6706-5p	417110	MRRF	XM_004946001	mitochondrial ribosome recycling factor
gga-miR-15c-5p	428412	CCNY	XM_004939170	cyclin Y
gga-miR-15c-5p	421932	YWHAQ	NM_001006415	tyrosine 3-monooxygenase/tryptophan 5-monooxygenase activation protein, theta polypeptide
gga-miR-15c-5p	422038	FDFT1	NM_001039294	farnesyl-diphosphate farnesyltransferase 1
gga-miR-15c-5p	428474	PQLC1	XM_426032	PQ loop repeat containing 1
gga-miR-15c-5p	417685	FAM64A	XM_004946820	family with sequence similarity 64, member A
gga-miR-15c-5p	416303	KLHL3	XM_414621	kelch-like 3 (Drosophila)
gga-miR-15c-5p	395544	SMAD7B	NM_001159663	TGF-beta signal pathway antagonist Smad7
gga-miR-15c-5p	427665	LOC427665	XM_004945198	chemokine-like receptor 1-like
gga-miR-15c-5p	374021	RNF111	NM_001199751	ring finger protein 111
gga-miR-15c-5p	423815	2019-03-05	NM_001012906	membrane-associated ring finger (C3HC4) 5
gga-miR-15c-5p	417167	GTF3C4	XM_415450	general transcription factor IIIC, polypeptide 4, 90kDa
gga-miR-15c-5p	770683	HIP1	XM_004946395	huntingtin interacting protein 1
gga-miR-15c-5p	419929	TAF8	NM_001030923	TAF8 RNA polymerase II, TATA box binding protein (TBP)-associated factor, 43kDa
gga-miR-15c-5p	421063	USP14	XM_004939757	ubiquitin specific peptidase 14 (tRNA-guanine transglycosylase)
gga-miR-15c-5p	429683	SMAD7	XM_004949015	SMAD family member 7
gga-miR-1701	422945	C4H20ORF194	XM_420883	chromosome 4 open reading frame, human C20orf194
gga-miR-1701	416809	TMEM132C	XM_004945521	transmembrane protein 132C
gga-miR-1628	100529061	RAB5B	NM_001199848	RAB5B, member RAS oncogene family
gga-miR-1628	427380	TSTD2	XM_424952	thiosulfate sulfurtransferase (rhodanese)-like domain containing 2
gga-miR-6581-5p	428622	REV3L	XM_426179	REV3-like, polymerase (DNA directed), zeta, catalytic subunit
gga-miR-6581-5p	101750889	LOC101750889	XM_004948665	platelet glycoprotein Ib alpha chain-like
gga-miR-138-5p	395190	P2RX1	NM_204519	purinergic receptor P2X, ligand-gated ion channel, 1
gga-miR-138-5p	421783	AIM1	XM_004940349	absent in melanoma 1
gga-miR-138-5p	424989	SLC7A14	XM_422796	solute carrier family 7 (orphan transporter), member 14
gga-miR-138-5p	416689	FAM208B	XM_414985	family with sequence similarity 208, member B
gga-miR-138-5p	421418	RBKS	XM_004935374	ribokinase
gga-miR-138-5p	100858652	LOC100858652	XM_004948412	forkhead box protein P4-like
gga-miR-138-5p	100538349	UBE2V1	NM_001205097	ubiquitin-conjugating enzyme E2 variant 1
gga-miR-138-5p	418740	DCUN1D2	XM_416939	DCN1, defective in cullin neddylation 1, domain containing 2 (S. cerevisiae)
gga-miR-138-5p	771718	CLRN1	XM_004943576	clarin 1
gga-miR-138-5p	423439	C5H14ORF49	XM_421348	chromosome 5 open reading frame, human C14orf49
gga-miR-138-5p	101410532	SELM	NM_001277859	selenoprotein M
gga-miR-138-5p	424623	TRABD2B	XM_422458	TraB domain containing 2B
gga-miR-138-5p	418308	EPHB6	NM_001004387	EPH receptor B6
gga-miR-1457	426196	FAM114A1	NM_001272017	family with sequence similarity 114, member A1
gga-miR-1457	427107	ARRDC3	XM_424699	arrestin domain containing 3
gga-miR-1457	426534	AK3	XM_004949065	adenylate kinase 3
gga-miR-1457	373987	THBS1	NM_001199453	thrombospondin 1
gga-miR-6706-5p	422084	CBX8	XM_004946287	chromobox homolog 8
gga-miR-6706-5p	395531	NID1	XM_419556	nidogen 1
gga-miR-6706-5p	421360	PTPN14	XM_419419	protein tyrosine phosphatase, non-receptor type 14
gga-miR-6706-5p	416315	PHF15	XM_004944997	PHD finger protein 15
gga-miR-6706-5p	423704	P4HA1	NM_001198736	prolyl 4-hydroxylase, alpha polypeptide I
gga-miR-6706-5p	420127	PGPEP1	XM_418244	pyroglutamyl-peptidase I
gga-miR-6706-5p	427449	DAB2	XM_004937210	disabled homolog 2, mitogen-responsive phosphoprotein (Drosophila)
gga-miR-6706-5p	770448	DESI1	XM_001233782	desumoylating isopeptidase 1
gga-miR-6706-5p	419464	NECAP2	NM_001012837	NECAP endocytosis associated 2
gga-miR-6706-5p	418193	BCAT1	XM_416424	branched chain amino-acid transaminase 1, cytosolic
gga-miR-6706-5p	418725	C1H2ORF49	NM_001030813	chromosome 1 open reading frame, human C2orf49
gga-miR-6706-5p	429159	PHC3	XM_004943491	polyhomeotic homolog 3 (Drosophila)
gga-miR-6706-5p	419287	DNMT3B	NM_001024828	DNA (cytosine-5-)-methyltransferase 3 beta
gga-miR-6706-5p	101749512	LOC101749512	XM_004950694	olfactory receptor 14J1-like
gga-miR-6706-5p	419055	RNF169	XM_417246	ring finger protein 169
gga-miR-6706-5p	768853	ARPP19	NM_001081707	cAMP-regulated phosphoprotein, 19kDa
gga-miR-6706-5p	771533	SLC39A11	XM_001234801	solute carrier family 39 (metal ion transporter), member 11
gga-miR-15c-5p	100859707	LOC100859707	XM_003640386	interleukin-2 receptor subunit beta-like
gga-miR-15c-5p	418949	LATS2	XM_417143	LATS, large tumor suppressor, homolog 2 (Drosophila)
gga-miR-15c-5p	418212	ITPR2	XM_004938005	inositol 1,4,5-trisphosphate receptor, type 2
gga-miR-15c-5p	427354	TTC39B	XM_004949103	tetratricopeptide repeat domain 39B
gga-miR-15c-5p	776013	PELI2	XM_004936479	pellino homolog 2 (Drosophila)
gga-miR-15c-5p	416064	RPP14	XM_414402	ribonuclease P/MRP 14kDa subunit
gga-miR-15c-5p	769452	DEF8	XM_001232733	differentially expressed in FDCP 8 homolog (mouse)
gga-miR-15c-5p	418924	SLC46A3	NM_001030828	solute carrier family 46, member 3
gga-miR-15c-5p	101751186	LOC101751186	XM_004948976	uncharacterized LOC101751186
gga-miR-15c-5p	419886	CSDE1	NM_001030918	cold shock domain containing E1, RNA-binding
gga-miR-15c-5p	423209	CHAC1	NM_001199656	ChaC, cation transport regulator homolog 1 (E. coli)
gga-miR-15c-5p	422893	NAT8L	XM_420835	N-acetyltransferase 8-like (GCN5-related, putative)
gga-miR-15c-5p	414881	RNF114	NM_001001767	ring finger protein 114
gga-miR-1701	418148	KDM5A	XM_004937924	lysine (K)-specific demethylase 5A
gga-miR-1701	423572	SOS2	XM_421461	son of sevenless homolog 2 (Drosophila)
gga-miR-1628	423411	SMEK1	XM_421321	SMEK homolog 1, suppressor of mek1 (Dictyostelium)
gga-miR-1628	419484	MFN2	XM_417640	mitofusin 2
gga-miR-6581-5p	374256	CD81	NM_001030339	CD81 molecule
gga-miR-138-5p	423876	SH3PXD2A	XM_004942264	SH3 and PX domains 2A
gga-miR-138-5p	428865	ARHGAP1	XM_004941592	Rho GTPase activating protein 1
gga-miR-138-5p	374117	IGJ	NM_204263	immunoglobulin J polypeptide, linker protein for immunoglobulin alpha and mu polypeptides
gga-miR-138-5p	100858896	LOC100858896	XM_004947488	protein FAM43B-like
gga-miR-138-5p	101748064	LOC101748064	XM_004944417	PHD finger protein 7-like
gga-miR-138-5p	769748	ZDHHC1	XM_001233038	zinc finger, DHHC-type containing 1
gga-miR-138-5p	428198	EPHA8	XM_003642540	EPH receptor A8
gga-miR-138-5p	395207	CENPI	NM_204532	centromere protein I
gga-miR-138-5p	419055	RNF169	XM_417246	ring finger protein 169
gga-miR-138-5p	426521	MRPL10	XM_004948572	mitochondrial ribosomal protein L10
gga-miR-138-5p	420094	ATCAY	XM_004948738	ataxia, cerebellar, Cayman type
gga-miR-138-5p	101751874	LOC101751874	XM_004940135	uncharacterized LOC101751874
gga-miR-138-5p	396494	EGFR	NM_205497	epidermal growth factor receptor
gga-miR-138-5p	419187	STK4	NM_001030853	serine/threonine kinase 4
gga-miR-1457	423825	GPR123	XM_421695	G protein-coupled receptor 123
gga-miR-1457	420178	LACTB2	NM_001277407	lactamase, beta 2
gga-miR-1457	420808	LOC420808	XM_004935081	probable 2-ketogluconate reductase-like
gga-miR-1457	423949	BUB3	NM_001006506	budding uninhibited by benzimidazoles 3 homolog (yeast)
gga-miR-1457	420661	RBMS3	XM_004939420	RNA binding motif, single stranded interacting protein 3
gga-miR-1457	416404	FAM173A	NM_001277151	family with sequence similarity 173, member A
gga-miR-460b-5p	424358	TROVE2	XM_422201	TROVE domain family, member 2
gga-miR-460b-5p	423608	WAPAL	NM_001199511	wings apart-like homolog (Drosophila)
gga-miR-6706-5p	427379	NCBP1	NM_001031440	nuclear cap binding protein subunit 1, 80kDa
gga-miR-6706-5p	417031	PLBD2	XM_003642233	phospholipase B domain containing 2
gga-miR-6706-5p	427997	CNKSR2	XM_004934667	connector enhancer of kinase suppressor of Ras 2
gga-miR-6706-5p	421487	CNST	XM_004935430	consortin, connexin sorting protein
gga-miR-6706-5p	427812	KCNJ16	XM_004946241	potassium inwardly-rectifying channel, subfamily J, member 16
gga-miR-15c-5p	395572	FZD3	NM_001271940	frizzled family receptor 3
gga-miR-15c-5p	423068	SOX6	XM_004941398	SRY (sex determining region Y)-box 6
gga-miR-15c-5p	424419	TOR1AIP2	XM_004943215	torsin A interacting protein 2
gga-miR-15c-5p	420962	EPB41L4B	XM_419046	erythrocyte membrane protein band 4.1 like 4B
gga-miR-15c-5p	417179	C9ORF58	XM_415461	allograft inflammatory factor 1-like
gga-miR-15c-5p	418265	MAN1A2	XM_416490	mannosidase, alpha, class 1A, member 2
gga-miR-15c-5p	416398	UBN1	NM_001079718	ubinuclein 1
gga-miR-15c-5p	419724	ARHGAP32	XM_417865	Rho GTPase activating protein 32
gga-miR-15c-5p	416073	C12H3ORF14	XM_004944655	chromosome 12 open reading frame, human C3orf14
gga-miR-15c-5p	425637	VPS4A	XM_423372	vacuolar protein sorting 4 homolog A (S. cerevisiae)
gga-miR-15c-5p	417805	SCAF11	NM_001195570	SR-related CTD-associated factor 11
gga-miR-15c-5p	417205	ZER1	XM_415488	zer-1 homolog (C. elegans)
gga-miR-15c-5p	771253	TMEM38A	NM_001079758	transmembrane protein 38A
gga-miR-15c-5p	418519	DSCR3	XM_416728	Down syndrome critical region gene 3
gga-miR-15c-5p	424373	C14ORF80	XM_004943156	chromosome 8 open reading frame, human C14orf80
gga-miR-15c-5p	422181	PHKA1	XM_003641091	phosphorylase kinase, alpha 1 (muscle)
gga-miR-15c-5p	421689	MAP7	NM_001031072	microtubule-associated protein 7
gga-miR-15c-5p	422318	CHIC1	NM_001031122	cysteine-rich hydrophobic domain 1
gga-miR-1701	418870	KPNA3	NM_001193575	karyopherin alpha 3 (importin alpha 4)
gga-miR-1701	423632	CSGALNACT2	XM_004941969	chondroitin sulfate N-acetylgalactosaminyltransferase 2
gga-miR-1701	420640	ANKRD28	XM_004939388	ankyrin repeat domain 28
gga-miR-1628	422665	SPATA5	XM_004941207	spermatogenesis associated 5
gga-miR-1628	101747626	LOC101747626	XM_004947493	putative uncharacterized protein C1orf196-like
gga-miR-1628	423241	TTBK2	XM_004941660	tau tubulin kinase 2
gga-miR-1628	395222	MTFR1	NM_204543	mitochondrial fission regulator 1
gga-miR-6581-5p	100857311	PRR15L	XM_003642798	proline rich 15-like
gga-miR-6581-5p	424415	XPR1	XM_003641660	xenotropic and polytropic retrovirus receptor 1
gga-miR-138-5p	426376	FAM107B	XM_424029	family with sequence similarity 107, member B
gga-miR-138-5p	422343	AMMECR1	XM_001234034	Alport syndrome, mental retardation, midface hypoplasia and elliptocytosis chromosomal region gene 1
gga-miR-138-5p	422966	C5H11ORF9	XM_420899	chromosome 5 open reading frame, human C11orf9
gga-miR-138-5p	431265	SHC3	XM_004949247	SHC (Src homology 2 domain containing) transforming protein 3
gga-miR-138-5p	428457	CCR4	XM_004939483	chemokine (C-C motif) receptor 4
gga-miR-138-5p	421173	LGR6	XM_004934825	leucine-rich repeat containing G protein-coupled receptor 6
gga-miR-138-5p	416043	GRIP2	XM_004944613	glutamate receptor interacting protein 2
gga-miR-138-5p	416190	ECSCR	XM_004944762	endothelial cell surface expressed chemotaxis and apoptosis regulator
gga-miR-138-5p	423932	INPP5F	XM_421792	inositol polyphosphate-5-phosphatase F
gga-miR-138-5p	423141	TPCN2	XM_003641336	two pore segment channel 2
gga-miR-138-5p	427934	MCAT	XM_425506	malonyl CoA:ACP acyltransferase (mitochondrial)
gga-miR-138-5p	769940	LOC769940	XM_003642068	ran-binding protein 17-like
gga-miR-138-5p	418066	PWP1	NM_001030761	PWP1 homolog (S. cerevisiae)
gga-miR-138-5p	417504	EMID2	XM_415753	EMI domain containing 2
gga-miR-1457	416207	BNIP1	XM_004944873	BCL2/adenovirus E1B 19kDa interacting protein 1
gga-miR-460b-5p	423295	ZNF770	XM_003641358	zinc finger protein 770
gga-miR-6706-5p	423862	ACTR1A	NM_001007948	ARP1 actin-related protein 1 homolog A, centractin alpha (yeast)
gga-miR-6706-5p	423099	TOLLIP	NM_001006471	toll interacting protein
gga-miR-6706-5p	420857	TMEM170B	XM_418945	transmembrane protein 170B
gga-miR-6706-5p	420187	TCEB1	NM_001007888	transcription elongation factor B (SIII), polypeptide 1 (15kDa, elongin C)
gga-miR-6706-5p	771624	OCC-1	NM_001145200	overexpressed in colon carcinoma 1 protein homolog
gga-miR-6706-5p	423724	ZMIZ1	XM_004942066	zinc finger, MIZ-type containing 1
gga-miR-15c-5p	424107	RAPH1	XM_421961	Ras association (RalGDS/AF-6) and pleckstrin homology domains 1
gga-miR-15c-5p	415729	NKD1	XM_004944180	naked cuticle homolog 1 (Drosophila)
gga-miR-15c-5p	101751943	RAPGEF6	XM_004945006	Rap guanine nucleotide exchange factor (GEF) 6
gga-miR-15c-5p	421684	TNFAIP3	XM_003640919	tumor necrosis factor, alpha-induced protein 3
gga-miR-15c-5p	423009	C5H15ORF57	NM_001199531	chromosome 5 open reading frame, human C15orf57
gga-miR-15c-5p	415377	RORA	NM_001289887	RAR-related orphan receptor A
gga-miR-15c-5p	769069	EDA	XM_003641131	ectodysplasin A
gga-miR-15c-5p	427934	MCAT	XM_425506	malonyl CoA:ACP acyltransferase (mitochondrial)
gga-miR-15c-5p	416843	RNF34	NM_001006188	ring finger protein 34, E3 ubiquitin protein ligase
gga-miR-15c-5p	422518	FAM190A	XM_420481	family with sequence similarity 190, member A
gga-miR-15c-5p	100858486	UEVLD	NM_001277424	UEV and lactate/malate dehyrogenase domains
gga-miR-15c-5p	417880	TMTC2	XM_416123	transmembrane and tetratricopeptide repeat containing 2
gga-miR-15c-5p	428388	KLHL38	XM_425948	kelch-like 38 (Drosophila)
gga-miR-15c-5p	422610	AGPAT9	NM_001031145	1-acylglycerol-3-phosphate O-acyltransferase 9
gga-miR-15c-5p	426798	SNX24	NM_001101649	sorting nexin 24
gga-miR-15c-5p	426879	CERS5	XM_004949727	ceramide synthase 5
gga-miR-15c-5p	427209	COL4A3BP	XM_424796	collagen, type IV, alpha 3 (Goodpasture antigen) binding protein
gga-miR-15c-5p	418800	PCDH9	XM_004934723	protocadherin 9
gga-miR-1701	416074	FEZF2	XM_004944654	FEZ family zinc finger 2
gga-miR-1701	427214	CRHBP	XM_424801	corticotropin releasing hormone binding protein
gga-miR-1628	419850	PFKFB2	XM_004934969	6-phosphofructo-2-kinase/fructose-2,6-biphosphatase 2
gga-miR-1628	421577	PARK2	XM_004935558	parkinson protein 2, E3 ubiquitin protein ligase (parkin)
gga-miR-6581-5p	422731	MTMR7	XM_420686	myotubularin related protein 7
gga-miR-6581-5p	423602	FAM13C	XM_004941936	family with sequence similarity 13, member C
gga-miR-6581-5p	421181	TBC1D22B	XM_004934807	TBC1 domain family, member 22B
gga-miR-138-5p	426557	RGS8	XM_004943208	regulator of G-protein signaling 8
gga-miR-138-5p	420325	KCNQ3	XM_003640867	potassium voltage-gated channel, KQT-like subfamily, member 3
gga-miR-138-5p	416276	TCOF1	NM_001012785	Treacher Collins-Franceschetti syndrome 1
gga-miR-138-5p	420144	CHERP	NM_001006341	calcium homeostasis endoplasmic reticulum protein
gga-miR-138-5p	415301	STRA6	XM_004943696	stimulated by retinoic acid gene 6 homolog (mouse)
gga-miR-138-5p	421658	TULP4	XM_419697	tubby like protein 4
gga-miR-138-5p	419685	LYPLA2	NM_001162382	lysophospholipase II
gga-miR-138-5p	100859608	LOC100859608	XM_003640679	cyclin-dependent kinase 14-like
gga-miR-138-5p	419732	ZBTB44	XM_417873	zinc finger and BTB domain containing 44
gga-miR-138-5p	101750316	HOXD1	XM_004942724	homeobox D1
gga-miR-138-5p	416809	TMEM132C	XM_004945521	transmembrane protein 132C
gga-miR-138-5p	422162	OPHN1	XM_420161	oligophrenin 1
gga-miR-138-5p	101747317	LOC101747317	XM_004938446	uncharacterized LOC101747317
gga-miR-1457	417821	SRGAP1	NM_001080101	SLIT-ROBO Rho GTPase activating protein 1
gga-miR-1457	421210	CCDC88A	XM_004940105	coiled-coil domain containing 88A
gga-miR-1457	420457	LARP4B	XM_418559	La ribonucleoprotein domain family, member 4B
gga-miR-1457	421564	MLLT4	XM_004935539	myeloid/lymphoid or mixed-lineage leukemia (trithorax homolog, Drosophila); translocated to, 4
gga-miR-460b-5p	419727	APLP2	NM_001006317	amyloid beta (A4) precursor-like protein 2
gga-miR-6706-5p	422332	MAGT1	NM_001006435	magnesium transporter 1
gga-miR-6706-5p	423490	LOC423490	XM_004936391	transmembrane protein C14orf180-like
gga-miR-6706-5p	416260	GALNT10	XM_004944936	UDP-N-acetyl-alpha-D-galactosamine:polypeptide N-acetylgalactosaminyltransferase 10 (GalNAc-T10)
gga-miR-6706-5p	100857188	TRIM67	XM_003640956	tripartite motif containing 67
gga-miR-6706-5p	423984	SLC40A1	NM_001012913	solute carrier family 40 (iron-regulated transporter), member 1
gga-miR-6706-5p	771849	CDA	NM_001146044	cytidine deaminase
gga-miR-6706-5p	420957	C2H9ORF5	XM_419042	chromosome 2 open reading frame, human C9orf5
gga-miR-6706-5p	416983	RAB35	NM_001030669	RAB35, member RAS oncogene family
gga-miR-6706-5p	428188	H6PD	XM_425746	hexose-6-phosphate dehydrogenase (glucose 1-dehydrogenase)
gga-miR-6706-5p	768418	LOC768418	XM_004949468	zinc finger FYVE domain-containing protein 16-like
gga-miR-15c-5p	395821	ATP6V1A	NM_204974	ATPase, H+ transporting, lysosomal 70kDa, V1 subunit A
gga-miR-15c-5p	419160	PTPRT	XM_004946991	protein tyrosine phosphatase, receptor type, T
gga-miR-15c-5p	416006	DENND6A	NM_001012781	family with sequence similarity 116, member A
gga-miR-15c-5p	422647	MOBKL1A	XM_004941174	MOB1, Mps One Binder kinase activator-like 1A (yeast)
gga-miR-15c-5p	419604	PDIK1L	XM_001232837	PDLIM1 interacting kinase 1 like
gga-miR-15c-5p	419754	TRIM29	XM_417892	tripartite motif-containing 29
gga-miR-15c-5p	423682	PRKG1	XM_003641459	protein kinase, cGMP-dependent, type I
gga-miR-15c-5p	418143	TMTC1	XM_416374	transmembrane and tetratricopeptide repeat containing 1
gga-miR-15c-5p	416031	TXNRD3	NM_001122777	thioredoxin reductase 3
gga-miR-15c-5p	423460	PPP2R5C	NM_001079482	protein phosphatase 2, regulatory subunit B', gamma
gga-miR-15c-5p	420951	VSTM2A	XM_004935156	V-set and transmembrane domain containing 2A
gga-miR-15c-5p	418240	NUP50	NM_001012541	nucleoporin 50kDa
gga-miR-15c-5p	418284	MLF2	NM_001030776	myeloid leukemia factor 2
gga-miR-15c-5p	418271	KPNA1	NM_001030774	karyopherin alpha 1 (importin alpha 5)
gga-miR-15c-5p	416871	HVCN1	NM_001030663	hydrogen voltage-gated channel 1
gga-miR-15c-5p	428928	NIN	XM_004936508	ninein (GSK3B interacting protein)
gga-miR-15c-5p	415957	IARS	XM_004944508	isoleucyl-tRNA synthetase
gga-miR-1701	416678	UBE2H	NM_001030647	ubiquitin-conjugating enzyme E2H
gga-miR-1628	423354	KIAA0317	XM_004941799	KIAA0317
gga-miR-1628	422230	IL13RA1	XM_420218	interleukin 13 receptor, alpha 1
gga-miR-1628	422702	TSPAN5	XM_004935957	tetraspanin 5
gga-miR-138-5p	416895	SVOP	XM_415186	SV2 related protein homolog (rat)
gga-miR-138-5p	427182	JMY	XM_003642911	junction mediating and regulatory protein, p53 cofactor
gga-miR-138-5p	428271	SPDEF	XM_425831	SAM pointed domain containing ets transcription factor
gga-miR-138-5p	419898	ANKS1A	XM_004935039	ankyrin repeat and sterile alpha motif domain containing 1A
gga-miR-138-5p	427494	TRPM1	XM_425066	transient receptor potential cation channel, subfamily M, member 1
gga-miR-138-5p	416976	GATC	XM_004934391	glutamyl-tRNA(Gln) amidotransferase, subunit C homolog (bacterial)
gga-miR-138-5p	428786	RHOH	XM_004936113	ras homolog family member H
gga-miR-1457	417217	DNM1	XM_004945826	dynamin 1
gga-miR-1457	418451	IGSF3	XM_416662	immunoglobulin superfamily, member 3
gga-miR-460b-5p	416667	CREBBP	XM_004945386	CREB binding protein
gga-miR-460b-5p	768911	LOC768911	XM_001232072	probable ribosome biogenesis protein RLP24-like
gga-miR-6706-5p	421478	PRKD3	XM_419526	protein kinase D3
gga-miR-6706-5p	417434	GNA13	XM_415686	guanine nucleotide binding protein (G protein), alpha 13
gga-miR-6706-5p	769515	ARL15	XM_004937233	ADP-ribosylation factor-like 15
gga-miR-6706-5p	420800	TPPP	XM_418894	tubulin polymerization promoting protein
gga-miR-6706-5p	419573	RLF	XM_417721	rearranged L-myc fusion
gga-miR-6706-5p	431645	MOBKL2B	XM_004949594	MOB1, Mps One Binder kinase activator-like 2B (yeast)
gga-miR-6706-5p	418561	MAOB	XM_416766	monoamine oxidase B
gga-miR-6706-5p	423614	SYT15	XM_421499	synaptotagmin XV
gga-miR-15c-5p	416939	CRKL	XM_415233	v-crk sarcoma virus CT10 oncogene homolog-like
gga-miR-15c-5p	420488	ACBD5	NM_001006356	acyl-CoA binding domain containing 5
gga-miR-15c-5p	419713	SRPR	NM_001039277	signal recognition particle receptor (docking protein)
gga-miR-15c-5p	420396	IBA57	NM_001030958	IBA57, iron-sulfur cluster assembly homolog (S. cerevisiae)
gga-miR-15c-5p	428222	EIF2C1	XM_004947768	eukaryotic translation initiation factor 2C, 1
gga-miR-15c-5p	422371	SLC25A43	XM_420343	solute carrier family 25, member 43
gga-miR-15c-5p	769312	TMEM194A	XM_001232566	transmembrane protein 194A
gga-miR-15c-5p	424393	PRRC2C	XM_003641656	proline-rich coiled-coil 2C
gga-miR-15c-5p	100858268	LOC100858268	XM_003643199	E3 ubiquitin-protein ligase RNF216-like
gga-miR-15c-5p	100859242	LOC100859242	XM_003643845	large neutral amino acids transporter small subunit 1-like
gga-miR-15c-5p	422329	ZDHHC15	XM_004940795	zinc finger, DHHC-type containing 15
gga-miR-15c-5p	428883	ARHGAP5	XM_426439	Rho GTPase activating protein 5
gga-miR-1701	423846	ARHGAP19	NM_001012909	Rho GTPase activating protein 19
gga-miR-1628	420976	NDUFS6	XM_003640768	NADH dehydrogenase (ubiquinone) Fe-S protein 6, 13kDa (NADH-coenzyme Q reductase)
gga-miR-1628	427752	PTGS1	XM_425326	prostaglandin-endoperoxide synthase 1 (prostaglandin G/H synthase and cyclooxygenase)
gga-miR-6581-5p	418953	CRYL1	NM_001030830	crystallin, lambda 1
gga-miR-6581-5p	423455	YY1	NM_001031210	YY1 transcription factor
gga-miR-6581-5p	418129	SYT10	XM_416361	synaptotagmin X
gga-miR-138-5p	425441	LOC425441	XM_423203	electroneutral sodium bicarbonate exchanger 1-like
gga-miR-138-5p	417132	GPSM1	XM_004945981	G-protein signaling modulator 1
gga-miR-138-5p	420705	ZDHHC3	XM_004939461	zinc finger, DHHC-type containing 3
gga-miR-138-5p	421141	CLVS1	XM_419223	clavesin 1
gga-miR-138-5p	417217	DNM1	XM_004945826	dynamin 1
gga-miR-138-5p	420006	MPP2	XM_003642818	membrane protein, palmitoylated 2 (MAGUK p55 subfamily member 2)
gga-miR-138-5p	424562	TIE1	XM_004936683	tyrosine kinase with immunoglobulin-like and EGF-like domains 1
gga-miR-138-5p	417805	SCAF11	NM_001195570	SR-related CTD-associated factor 11
gga-miR-138-5p	421828	ZNF292	XM_419852	zinc finger protein 292
gga-miR-138-5p	101752132	LOC101752132	XM_004948107	serine/arginine repetitive matrix protein 1-like
gga-miR-138-5p	421692	PDE7B	XM_419729	phosphodiesterase 7B
gga-miR-138-5p	395666	CD44	NM_204860	CD44 molecule (Indian blood group)
gga-miR-138-5p	770641	GPR55	XM_001233976	G protein-coupled receptor 55
gga-miR-138-5p	427801	MGAT5B	XM_425372	mannosyl (alpha-1,6-)-glycoprotein beta-1,6-N-acetyl-glucosaminyltransferase, isozyme B
gga-miR-138-5p	419046	KLHDC5	XM_417237	kelch domain containing 5
gga-miR-138-5p	101749616	LOC101749616	XM_004950186	zinc finger protein 662-like
gga-miR-138-5p	395124	CCNL2	NM_204470	cyclin L2
gga-miR-138-5p	416266	FAT2	XM_414584	FAT tumor suppressor homolog 2 (Drosophila)
gga-miR-1457	420195	PAG1	XM_004939934	phosphoprotein associated with glycosphingolipid microdomains 1
gga-miR-1457	417701	CBLL1	NM_001007848	Cbl proto-oncogene, E3 ubiquitin protein ligase-like 1
gga-miR-1457	396029	ZEB1	NM_205131	zinc finger E-box binding homeobox 1
gga-miR-460b-5p	396309	ANK3	NM_001277097	ankyrin 3, node of Ranvier (ankyrin G)
gga-miR-6706-5p	395228	RDM1	NM_204546	RAD52 motif 1
gga-miR-6706-5p	423277	LOC423277	XM_421196	galectin-related protein-like
gga-miR-6706-5p	415815	KIAA1609	NM_001030575	KIAA1609
gga-miR-6706-5p	419118	C20H20ORF4	NM_001030844	chromosome 20 open reading frame, human C20orf4
gga-miR-6706-5p	420801	SLC9A3	XM_004935075	solute carrier family 9, subfamily A (NHE3, cation proton antiporter 3), member 3
gga-miR-6706-5p	419439	GPR157	XM_004947445	G protein-coupled receptor 157
gga-miR-6706-5p	419187	STK4	NM_001030853	serine/threonine kinase 4
gga-miR-6706-5p	421497	AKT3	XM_419544	v-akt murine thymoma viral oncogene homolog 3 (protein kinase B, gamma)
gga-miR-6706-5p	416473	IQCE	XM_414778	IQ motif containing E
gga-miR-6706-5p	416989	SRRM4	XM_415281	serine/arginine repetitive matrix 4
gga-miR-6706-5p	416237	UBLCP1	NM_001030613	ubiquitin-like domain containing CTD phosphatase 1
gga-miR-6706-5p	428409	HTR5A	XM_425970	5-hydroxytryptamine (serotonin) receptor 5A, G protein-coupled
gga-miR-15c-5p	417494	ANKFY1	XM_415742	ankyrin repeat and FYVE domain containing 1
gga-miR-15c-5p	416847	TMEM120B	NM_001030659	transmembrane protein 120B
gga-miR-15c-5p	422161	YIPF6	XM_420160	Yip1 domain family, member 6
gga-miR-15c-5p	423482	BAG5	NM_001031211	BCL2-associated athanogene 5
gga-miR-15c-5p	416639	LOC416639	XM_003642108	UPF0472 protein C16orf72 homolog
gga-miR-15c-5p	416829	MPHOSPH9	XM_415120	M-phase phosphoprotein 9
gga-miR-15c-5p	423447	CCDC85C	XM_421357	coiled-coil domain containing 85C
gga-miR-15c-5p	420460	WDR37	XM_418562	WD repeat domain 37
gga-miR-15c-5p	771207	LOC771207	XM_003640384	pyridoxal phosphate phosphatase-like
gga-miR-15c-5p	423044	SWAP70	NM_001031180	SWAP switching B-cell complex 70kDa subunit
gga-miR-15c-5p	417136	SEC16A	XM_004945975	SEC16 homolog A (S. cerevisiae)
gga-miR-15c-5p	422229	DOCK11	XM_003641136	dedicator of cytokinesis 11
gga-miR-15c-5p	418589	GK	XM_003640510	glycerol kinase
gga-miR-15c-5p	427991	XK	NM_001034822	X-linked Kx blood group (McLeod syndrome)
gga-miR-15c-5p	420444	RBM33	XM_004939156	RNA binding motif protein 33
gga-miR-1701	417494	ANKFY1	XM_415742	ankyrin repeat and FYVE domain containing 1
gga-miR-1701	419889	TSPAN2	XM_004935005	tetraspanin 2
gga-miR-1701	422590	AFF1	XM_004941099	AF4/FMR2 family, member 1
gga-miR-1628	420909	RNF152	XM_004939699	ring finger protein 152
gga-miR-1628	421916	TSSC1	NM_001031088	tumor suppressing subtransferable candidate 1
gga-miR-1628	419478	PRDM2	XM_003642514	PR domain containing 2, with ZNF domain
gga-miR-138-5p	769352	DUS4L	XM_001231914	dihydrouridine synthase 4-like (S. cerevisiae)
gga-miR-138-5p	426917	JMJD8	NM_001278726	jumonji domain containing 8
gga-miR-138-5p	420964	MOCOS	XM_419048	molybdenum cofactor sulfurase
gga-miR-138-5p	416003	ASB14	XM_414345	ankyrin repeat and SOCS box containing 14
gga-miR-138-5p	418282	C1H12ORF53	XM_004938114	chromosome 1 open reading frame, human C12orf53
gga-miR-138-5p	416633	LOC416633	XM_004945315	class II, major histocompatibility complex, transactivator-like
gga-miR-138-5p	100859398	POLD2	XM_004950987	polymerase (DNA directed), delta 2, accessory subunit
gga-miR-138-5p	424238	TFCP2L1	XM_422087	transcription factor CP2-like 1
gga-miR-138-5p	415602	YTHDC2	XM_004949270	YTH domain containing 2
gga-miR-1457	416002	APPL1	XM_004944584	adaptor protein, phosphotyrosine interaction, PH domain and leucine zipper containing 1
gga-miR-1457	422804	SEL1L3	XM_420754	sel-1 suppressor of lin-12-like 3 (C. elegans)
gga-miR-1457	771549	INPP5K	NM_001282294	inositol polyphosphate-5-phosphatase K
gga-miR-1457	428385	ASAP1	XM_425945	ArfGAP with SH3 domain, ankyrin repeat and PH domain 1
gga-miR-1457	430410	VAT1L	XM_004944255	vesicle amine transport protein 1 homolog (T. californica)-like
gga-miR-1457	424543	TTLL7	XM_004936663	tubulin tyrosine ligase-like family, member 7
gga-miR-1457	417867	ZDHHC17	NM_001030745	zinc finger, DHHC-type containing 17
gga-miR-1457	417417	MILR1	XM_004946186	mast cell immunoglobulin-like receptor 1
gga-miR-1457	415574	CTDSPL2	NM_001012772	CTD (carboxy-terminal domain, RNA polymerase II, polypeptide A) small phosphatase like 2
gga-miR-1457	420957	C2H9ORF5	XM_419042	chromosome 2 open reading frame, human C9orf5
gga-miR-1457	374203	FBN2	XM_004949379	fibrillin 2
gga-miR-1457	422175	ZC3H12B	XM_003641129	zinc finger CCCH-type containing 12B
gga-miR-1457	416595	KIAA0430	XM_414895	KIAA0430
gga-miR-460b-5p	416948	C15H22ORF13	XM_415241	chromosome 15 open reading frame, human C22orf13
gga-miR-460b-5p	422342	PAK3	XM_420314	p21 protein (Cdc42/Rac)-activated kinase 3
gga-miR-6706-5p	421409	PRKCE	XM_419464	protein kinase C, epsilon
gga-miR-6706-5p	424030	ASB1	XM_004942513	ankyrin repeat and SOCS box containing 1
gga-miR-6706-5p	395799	TPH1	NM_204956	tryptophan hydroxylase 1
gga-miR-6706-5p	418651	SHROOM2	XM_416847	shroom family member 2
gga-miR-6706-5p	420994	ERP44	XM_419079	endoplasmic reticulum protein 44
gga-miR-15c-5p	429162	PPM1L	XM_426717	protein phosphatase, Mg2+/Mn2+ dependent, 1L
gga-miR-15c-5p	419409	LOC419409	XM_004947400	Golgi integral membrane protein 4-like
gga-miR-15c-5p	424262	OSBPL11	XM_004942956	oxysterol binding protein-like 11
gga-miR-15c-5p	421940	PDIA6	XM_419952	protein disulfide isomerase family A, member 6
gga-miR-15c-5p	420824	E2F3	XM_418915	E2F transcription factor 3
gga-miR-15c-5p	417434	GNA13	XM_415686	guanine nucleotide binding protein (G protein), alpha 13
gga-miR-15c-5p	396328	KCNJ2	NM_205370	potassium inwardly-rectifying channel, subfamily J, member 2
gga-miR-15c-5p	770250	SLC36A1	XM_001233581	solute carrier family 36 (proton/amino acid symporter), member 1
gga-miR-15c-5p	416675	AHCYL2	XM_004937410	adenosylhomocysteinase-like 2
gga-miR-15c-5p	427171	PIK3R1	XM_004937313	phosphoinositide-3-kinase, regulatory subunit 1 (alpha)
gga-miR-15c-5p	422297	VAMP7	NM_001031121	vesicle-associated membrane protein 7
gga-miR-15c-5p	422741	KIAA1456	XM_004936013	KIAA1456
gga-miR-15c-5p	421653	ZDHHC14	XM_419692	zinc finger, DHHC-type containing 14
gga-miR-15c-5p	417338	RAB40B	NM_001278050	RAB40B, member RAS oncogene family
gga-miR-15c-5p	421523	SIPA1L2	XM_004935483	signal-induced proliferation-associated 1 like 2
gga-miR-15c-5p	416856	BCL7A	XM_415148	B-cell CLL/lymphoma 7A
gga-miR-15c-5p	419951	TANC2	XM_004948528	tetratricopeptide repeat, ankyrin repeat and coiled-coil containing 2
gga-miR-15c-5p	421074	RIOK3	XM_004939782	RIO kinase 3 (yeast)
gga-miR-15c-5p	770140	CTIF	XM_003642898	CBP80/20-dependent translation initiation factor
gga-miR-1701	422360	STAG2	XM_004940828	stromal antigen 2
gga-miR-1701	419047	MANSC4	XM_004938058	MANSC domain containing 4
gga-miR-1628	418265	MAN1A2	XM_416490	mannosidase, alpha, class 1A, member 2
gga-miR-1628	421860	FILIP1	XM_419877	filamin A interacting protein 1
gga-miR-1628	101751764	LOC101751764	XM_004939038	GTPase IMAP family member 8-like
gga-miR-1628	420099	MED16	XM_418220	mediator complex subunit 16
gga-miR-6581-5p	418855	LRCH1	XM_004938696	leucine-rich repeats and calponin homology (CH) domain containing 1
gga-miR-138-5p	100858894	SMTN	XM_003642227	smoothelin
gga-miR-138-5p	420115	HOMER3	XM_003642881	homer homolog 3 (Drosophila)
gga-miR-138-5p	100857799	LOC100857799	XM_003643494	ATP-sensitive inward rectifier potassium channel 10-like
gga-miR-138-5p	420910	C5ORF22	XM_418996	chromosome 2 open reading frame, human C5orf22
gga-miR-138-5p	100858042	LOC100858042	XM_003641331	protein yippee-like 4-like
gga-miR-138-5p	422291	PRRG3	XM_004940735	proline rich Gla (G-carboxyglutamic acid) 3 (transmembrane)
gga-miR-138-5p	416496	MAP2K3	NM_001012787	mitogen-activated protein kinase kinase 3
gga-miR-138-5p	419058	PPME1	NM_001030834	protein phosphatase methylesterase 1
gga-miR-138-5p	416351	STK32A	NM_001025611	serine/threonine kinase 32A
gga-miR-138-5p	101751853	LOC101751853	XM_004941611	uncharacterized LOC101751853
gga-miR-1457	395355	CBX3	NM_204643	chromobox homolog 3
gga-miR-1457	418478	GABPA	NM_001007858	GA binding protein transcription factor, alpha subunit 60kDa
gga-miR-1457	420007	NBR1	XM_418128	neighbor of BRCA1 gene 1
gga-miR-1457	395374	DBT	NM_204656	dihydrolipoamide branched chain transacylase E2
gga-miR-1457	416605	SMG1	XM_414907	smg-1 homolog, phosphatidylinositol 3-kinase-related kinase (C. elegans)
gga-miR-460b-5p	419310	SLMO2	NM_001030866	slowmo homolog 2 (Drosophila)
gga-miR-460b-5p	378918	TRAM1	NM_204400	translocation associated membrane protein 1
gga-miR-460b-5p	428352	RAB8A	NM_001031504	RAB8A, member RAS oncogene family
gga-miR-6706-5p	424905	MB21D2	XM_422716	Mab-21 domain containing 2
gga-miR-6706-5p	423068	SOX6	XM_004941398	SRY (sex determining region Y)-box 6
gga-miR-6706-5p	417859	CAPS2	XM_004937574	calcyphosine 2
gga-miR-6706-5p	423689	SLC25A16	XM_004942015	solute carrier family 25 (mitochondrial carrier; Graves disease autoantigen), member 16
gga-miR-6706-5p	771503	CERS6	XM_004942776	ceramide synthase 6
gga-miR-6706-5p	416580	USP31	XM_003642146	ubiquitin specific peptidase 31
gga-miR-6706-5p	771554	DCAF7	NM_001079504	DDB1 and CUL4 associated factor 7
gga-miR-15c-5p	415493	ABHD2	XM_004943846	abhydrolase domain containing 2
gga-miR-15c-5p	423031	MICAL2	XM_003641316	microtubule associated monoxygenase, calponin and LIM domain containing 2
gga-miR-15c-5p	417268	SLC31A1	XM_004945770	solute carrier family 31 (copper transporters), member 1
gga-miR-15c-5p	423722	ZCCHC24	XM_421599	zinc finger, CCHC domain containing 24
gga-miR-15c-5p	422347	LOC422347	XM_003641084	insulin receptor substrate 2-B-like
gga-miR-15c-5p	427168	SREK1	XM_004937297	splicing regulatory glutamine/lysine-rich protein 1
gga-miR-15c-5p	768712	TBC1D16	XM_001231438	TBC1 domain family, member 16
gga-miR-15c-5p	423394	GALC	XM_421304	galactosylceramidase
gga-miR-15c-5p	420582	NXPH1	XM_418683	neurexophilin 1
gga-miR-15c-5p	427008	CRYM	XM_424610	crystallin, mu
gga-miR-15c-5p	100858067	LOC100858067	XM_003643151	potassium voltage-gated channel subfamily A member 6-like
gga-miR-15c-5p	428995	VWC2L	XM_004942464	von Willebrand factor C domain containing protein 2-like
gga-miR-15c-5p	415765	PDCD5	NM_001277586	programmed cell death 5
gga-miR-15c-5p	418065	PRDM4	XM_416301	PR domain containing 4
gga-miR-15c-5p	415458	HOMER2	XM_413836	homer homolog 2 (Drosophila)
gga-miR-15c-5p	421474	CEBPZ	NM_001031060	CCAAT/enhancer binding protein (C/EBP), zeta
gga-miR-15c-5p	419814	KCTD20	XM_004934888	potassium channel tetramerisation domain containing 20
gga-miR-15c-5p	421715	RSPO3	XM_419752	R-spondin 3
gga-miR-15c-5p	429005	SLC39A10	XM_426562	solute carrier family 39 (zinc transporter), member 10
gga-miR-15c-5p	419117	EPB41L1	XM_004946847	erythrocyte membrane protein band 4.1-like 1
gga-miR-15c-5p	419346	NFATC2	XM_004947255	nuclear factor of activated T-cells, cytoplasmic, calcineurin-dependent 2
gga-miR-15c-5p	770621	FAM91A1	XM_001233959	family with sequence similarity 91, member A1
gga-miR-15c-5p	418461	CHMP2B	NM_001030792	charged multivesicular body protein 2B
gga-miR-1701	420589	ARL4A	XM_418690	ADP-ribosylation factor-like 4A
gga-miR-1701	396334	TCF12	NM_205375	transcription factor 12
gga-miR-1701	769400	KCTD4	NM_001199326	potassium channel tetramerisation domain containing 4
gga-miR-1628	419380	LRRC47	XM_417543	leucine rich repeat containing 47
gga-miR-1628	416174	GABRP	XM_414507	gamma-aminobutyric acid (GABA) A receptor, pi
gga-miR-1628	419315	STX16	NM_001006295	syntaxin 16
gga-miR-1628	418947	ZDHHC20	XM_004938811	zinc finger, DHHC-type containing 20
gga-miR-138-5p	426314	SUV39H2	NM_001031370	suppressor of variegation 3-9 homolog 2 (Drosophila)
gga-miR-138-5p	101751271	LOC101751271	XM_004943133	1-phosphatidylinositol phosphodiesterase-like
gga-miR-138-5p	374035	GIT2	NM_204206	G protein-coupled receptor kinase interactor 2
gga-miR-138-5p	418212	ITPR2	XM_004938005	inositol 1,4,5-trisphosphate receptor, type 2
gga-miR-138-5p	420951	VSTM2A	XM_004935156	V-set and transmembrane domain containing 2A
gga-miR-138-5p	418265	MAN1A2	XM_416490	mannosidase, alpha, class 1A, member 2
gga-miR-138-5p	419779	MPZL2	NM_001252284	myelin protein zero-like 2
gga-miR-138-5p	769024	GPR17	XM_001231869	G protein-coupled receptor 17
gga-miR-138-5p	424026	ARL4C	XM_001237034	ADP-ribosylation factor-like 4C
gga-miR-1457	424633	EPS15	NM_001031283	epidermal growth factor receptor pathway substrate 15
gga-miR-1457	427000	ERI2	XM_424602	ERI1 exoribonuclease family member 2
gga-miR-1457	429156	NAALADL2	XM_004943465	N-acetylated alpha-linked acidic dipeptidase-like 2
gga-miR-1457	100859860	LOC100859860	XM_003641349	EH domain-containing protein 4-like
gga-miR-1457	424149	ZAK	XM_004942735	sterile alpha motif and leucine zipper containing kinase AZK
gga-miR-1457	101747869	LOC101747869	XM_004941554	myb-related transcription factor, partner of profilin-like
gga-miR-6653-3p	101751764	LOC101751764	XM_004939038	GTPase IMAP family member 8-like
gga-miR-6653-3p	776273	LOC776273	XM_004940083	1-phosphatidylinositol-4,5-bisphosphate phosphodiesterase gamma-1-like
gga-miR-6706-5p	421352	TGFB2	XM_003640970	transforming growth factor, beta 2
gga-miR-6706-5p	769469	PDE4D	XM_004937258	phosphodiesterase 4D, cAMP-specific
gga-miR-6706-5p	415725	CYLD	XM_004944175	cylindromatosis (turban tumor syndrome)
gga-miR-6706-5p	416698	SLC35B4	XM_414994	solute carrier family 35, member B4
gga-miR-6706-5p	423391	SEL1L	XM_421303	sel-1 suppressor of lin-12-like (C. elegans)
gga-miR-6706-5p	428987	PPAPDC1A	XM_004942326	phosphatidic acid phosphatase type 2 domain containing 1A
gga-miR-6706-5p	417992	TOB2	NM_001012534	transducer of ERBB2, 2
gga-miR-6706-5p	421329	TP53BP2	XM_004935301	tumor protein p53 binding protein, 2
gga-miR-15c-5p	428201	STC1	XM_004947560	stanniocalcin 1
gga-miR-15c-5p	424234	PTPN4	XM_004942894	protein tyrosine phosphatase, non-receptor type 4 (megakaryocyte)
gga-miR-15c-5p	418142	IPO8	XM_416373	importin 8
gga-miR-15c-5p	419401	TMEM52	XM_417563	transmembrane protein 52
gga-miR-15c-5p	423439	C5H14ORF49	XM_421348	chromosome 5 open reading frame, human C14orf49
gga-miR-15c-5p	395644	USP15	NM_204840	ubiquitin specific peptidase 15
gga-miR-15c-5p	421916	TSSC1	NM_001031088	tumor suppressing subtransferable candidate 1
gga-miR-15c-5p	419468	IFFO2	XM_003642530	intermediate filament family orphan 2
gga-miR-15c-5p	396194	ANG	NM_205259	angiogenin, ribonuclease, RNase A family, 5
gga-miR-15c-5p	419287	DNMT3B	NM_001024828	DNA (cytosine-5-)-methyltransferase 3 beta
gga-miR-15c-5p	428242	ABCG4	XM_004948043	ATP-binding cassette, sub-family G (WHITE), member 4
gga-miR-15c-5p	100857356	LOC100857356	XM_003642897	zinc finger protein 532-like
gga-miR-15c-5p	424344	WDR47	XM_422187	WD repeat domain 47
gga-miR-15c-5p	769652	SLC2A13	XM_001232939	solute carrier family 2 (facilitated glucose transporter), member 13
gga-miR-15c-5p	417637	RPS6KB1	NM_001030721	ribosomal protein S6 kinase, 70kDa, polypeptide 1
gga-miR-15c-5p	428455	MYRIP	XM_426015	myosin VIIA and Rab interacting protein
gga-miR-15c-5p	418329	RABL3	NM_001030780	RAB, member of RAS oncogene family-like 3
gga-miR-15c-5p	423154	PDHX	NM_001031187	pyruvate dehydrogenase complex, component X
gga-miR-15c-5p	420871	SSR1	NM_001006375	signal sequence receptor, alpha
gga-miR-1701	420707	TMEM42	XM_418806	transmembrane protein 42
gga-miR-1701	423834	HPSE2	XM_004942175	heparanase 2
gga-miR-1701	769510	LOC769510	XM_004939085	uncharacterized LOC769510
gga-miR-1701	419777	AMICA1	XM_417915	adhesion molecule, interacts with CXADR antigen 1
gga-miR-1628	422587	NUDT9	XM_420546	nudix (nucleoside diphosphate linked moiety X)-type motif 9
gga-miR-1628	424786	DNER	XM_422604	delta/notch-like EGF repeat containing
gga-miR-1628	770334	PSD3	XM_004949348	pleckstrin and Sec7 domain containing 3
gga-miR-1628	395469	PDGFC	NM_204721	platelet derived growth factor C
gga-miR-1628	428074	STOML3	XM_425632	stomatin (EPB72)-like 3
gga-miR-138-5p	395658	RBBP4	NM_204852	retinoblastoma binding protein 4
gga-miR-138-5p	769837	LOC769837	XM_004940622	probable G-protein coupled receptor 34-like
gga-miR-138-5p	101748428	LOC101748428	XM_004934410	uncharacterized LOC101748428
gga-miR-138-5p	428098	KCTD21	XM_004938933	potassium channel tetramerisation domain containing 21
gga-miR-138-5p	100858944	LOC100858944	XM_004950095	probable G-protein coupled receptor 34-like
gga-miR-138-5p	416308	SLC25A48	XM_004944989	solute carrier family 25, member 48
gga-miR-138-5p	423462	LOC423462	XM_004936325	uncharacterized LOC423462
gga-miR-138-5p	426299	MXD1	NM_001039310	MAX dimerization protein 1
gga-miR-138-5p	425047	HPS3	XM_004943590	Hermansky-Pudlak syndrome 3
gga-miR-138-5p	422325	KIAA2022	XM_004940790	KIAA2022
gga-miR-138-5p	415355	FBXO22	NM_001030545	F-box protein 22
gga-miR-138-5p	416961	EIF4ENIF1	XM_004934370	eukaryotic translation initiation factor 4E nuclear import factor 1
gga-miR-138-5p	416807	GLT1D1	NM_001030656	glycosyltransferase 1 domain containing 1
gga-miR-138-5p	420449	PTPRN2	XM_418552	protein tyrosine phosphatase, receptor type, N polypeptide 2
gga-miR-1457	100857742	MCM9	XM_004940275	minichromosome maintenance complex component 9
gga-miR-1457	422234	GPC4	XM_420222	glypican 4
gga-miR-460b-5p	421192	XPO1	NM_001290134	exportin 1 (CRM1 homolog, yeast)
gga-miR-460b-5p	427351	RFX3	XM_004949059	regulatory factor X, 3 (influences HLA class II expression)
gga-miR-6706-5p	428911	RCOR1	XM_426467	REST corepressor 1
gga-miR-6706-5p	423259	KIAA0247	XM_004941691	KIAA0247
gga-miR-6706-5p	428258	LOC428258	XM_425817	patatin-like phospholipase domain-containing protein 1-like
gga-miR-6706-5p	408038	LOC408038	NM_001001310	beta-keratin
gga-miR-6706-5p	396550	SCP2	XM_004936797	sterol carrier protein 2
gga-miR-6706-5p	420440	DPP6	XM_418545	dipeptidyl-peptidase 6
gga-miR-6706-5p	427178	PAPD4	XM_004937323	PAP associated domain containing 4
gga-miR-6706-5p	420301	LOC420301	XM_418413	lymphocyte antigen 6 complex, locus E-like
gga-miR-6706-5p	396044	M6PR	XM_416477	mannose-6-phosphate receptor (cation dependent)
gga-miR-15c-5p	424003	C2ORF21	XM_004942457	unc-80 homolog (C. elegans)
gga-miR-15c-5p	417456	NPLOC4	XM_004946251	nuclear protein localization 4 homolog (S. cerevisiae)
gga-miR-15c-5p	419229	CABLES2	XM_417406	Cdk5 and Abl enzyme substrate 2
gga-miR-15c-5p	419877	MAGI3	NM_001012697	membrane associated guanylate kinase, WW and PDZ domain containing 3
gga-miR-15c-5p	423924	RAB11FIP2	XM_421784	RAB11 family interacting protein 2 (class I)
gga-miR-15c-5p	100859865	LOC100859865	XM_003642398	eukaryotic translation initiation factor 4H-like
gga-miR-15c-5p	420299	RHPN1	XM_418410	rhophilin, Rho GTPase binding protein 1
gga-miR-15c-5p	417877	PPFIA2	XM_416120	protein tyrosine phosphatase, receptor type, f polypeptide (PTPRF), interacting protein (liprin), alpha 2
gga-miR-1701	419521	RASSF2	NM_001030884	Ras association (RalGDS/AF-6) domain family member 2
gga-miR-1701	419043	FAR2	XM_004938067	fatty acyl CoA reductase 2
gga-miR-1628	422781	APBB2	XM_004936094	amyloid beta (A4) precursor protein-binding, family B, member 2
gga-miR-138-5p	420406	KLHL18	NM_001030960	kelch-like 18 (Drosophila)
gga-miR-138-5p	420716	LOC420716	NM_001114503	C-RF amide
gga-miR-138-5p	769242	LOC769242	XM_004946073	TBC1 domain family member 24-like
gga-miR-138-5p	426655	SPAG4	XM_424281	sperm associated antigen 4
gga-miR-138-5p	419154	NECAB3	NM_001030850	N-terminal EF-hand calcium binding protein 3
gga-miR-138-5p	770956	TMEM37	XM_001234271	transmembrane protein 37
gga-miR-138-5p	100858736	MORN3	XM_003642178	MORN repeat containing 3
gga-miR-1457	418888	COG6	XM_417082	component of oligomeric golgi complex 6
gga-miR-1457	420289	TRPS1	XM_418402	trichorhinophalangeal syndrome I
gga-miR-1457	408048	PCDH10	NM_214672	protocadherin 10
gga-miR-1457	420585	THSD7A	XM_004939323	thrombospondin, type I, domain containing 7A
gga-miR-1457	421280	VPS54	XM_419349	vacuolar protein sorting 54 homolog (S. cerevisiae)
gga-miR-460b-5p	416616	VWA3A	XM_414917	von Willebrand factor A domain containing 3A
gga-miR-460b-5p	424992	GPR160	NM_001277472	G protein-coupled receptor 160
gga-miR-460b-5p	418491	TIAM1	XM_416699	T-cell lymphoma invasion and metastasis 1
gga-miR-460b-5p	417807	SLC38A2	NM_001030741	solute carrier family 38, member 2
gga-miR-460b-5p	423720	AIFM2	XM_421597	apoptosis-inducing factor, mitochondrion-associated, 2
gga-miR-6706-5p	417598	NCOR1	XM_004946656	nuclear receptor corepressor 1
gga-miR-6706-5p	417408	ATAD5	NM_001270725	ATPase family, AAA domain containing 5
gga-miR-6706-5p	419649	PTP4A2	XM_001233321	protein tyrosine phosphatase type IVA, member 2
gga-miR-6706-5p	419197	TTPAL	NM_001030854	tocopherol (alpha) transfer protein-like
gga-miR-6706-5p	418550	AGPAT3	XM_004934599	1-acylglycerol-3-phosphate O-acyltransferase 3
gga-miR-6706-5p	422329	ZDHHC15	XM_004940795	zinc finger, DHHC-type containing 15
gga-miR-6706-5p	416677	NRF1	NM_001030646	nuclear respiratory factor 1
gga-miR-15c-5p	421854	PHIP	XM_003640997	pleckstrin homology domain interacting protein
gga-miR-15c-5p	424545	LPHN2	NM_001190477	latrophilin 2
gga-miR-15c-5p	418364	C1H3orf17	XM_004938223	chromosome 3 open reading frame 17-like
gga-miR-15c-5p	428101	KCNA1	XM_004938074	potassium voltage-gated channel, shaker-related subfamily, member 1 (episodic ataxia with myokymia)
gga-miR-15c-5p	420893	MYLK4	XM_004939680	myosin light chain kinase family, member 4
gga-miR-15c-5p	100538349	UBE2V1	NM_001205097	ubiquitin-conjugating enzyme E2 variant 1
gga-miR-15c-5p	770958	SSBP2	XM_004949454	single-stranded DNA binding protein 2
gga-miR-15c-5p	101751025	LOC101751025	XM_004951083	zinc finger protein 316-like
gga-miR-15c-5p	395410	ABL2	XM_422269	v-abl Abelson murine leukemia viral oncogene homolog 2
gga-miR-15c-5p	395594	HAS2	NM_204806	hyaluronan synthase 2
gga-miR-15c-5p	417831	WIF1	NM_001199607	WNT inhibitory factor 1
gga-miR-15c-5p	428865	ARHGAP1	XM_004941592	Rho GTPase activating protein 1
gga-miR-15c-5p	423972	PWWP2B	XM_421830	PWWP domain containing 2B
gga-miR-15c-5p	426381	EED	NM_001031376	embryonic ectoderm development
gga-miR-15c-5p	416711	TTL	NM_001199392	tubulin tyrosine ligase
gga-miR-15c-5p	417594	TIMM22	XM_415839	translocase of inner mitochondrial membrane 22 homolog (yeast)
gga-miR-15c-5p	421489	SMYD3	XM_004935434	SET and MYND domain containing 3
gga-miR-15c-5p	415990	BICD2	XM_004944558	bicaudal D homolog 2 (Drosophila)
gga-miR-15c-5p	100858831	ANKRD55	XM_003642944	ankyrin repeat domain 55
gga-miR-1701	418488	BACH1	XM_416696	BTB and CNC homology 1, basic leucine zipper transcription factor 1
gga-miR-1701	419762	CADM1	XM_004948073	cell adhesion molecule 1
gga-miR-1701	426934	PANX2	XM_004937510	pannexin 2
gga-miR-1628	100859859	RNF212	XM_003641259	ring finger protein 212
gga-miR-1628	101750479	LOC101750479	XM_004934715	uncharacterized LOC101750479
gga-miR-6581-5p	421994	RAB10	NM_001031097	RAB10, member RAS oncogene family
gga-miR-138-5p	100858952	LOC100858952	XM_003642449	centrosome-associated protein CEP250-like
gga-miR-138-5p	423616	TIMM23	XM_421501	translocase of inner mitochondrial membrane 23 homolog (yeast)
gga-miR-138-5p	430542	NEU3	XM_428099	sialidase 3 (membrane sialidase)
gga-miR-138-5p	422382	RNF128	XM_420351	ring finger protein 128
gga-miR-138-5p	421449	GTPBP2	XM_419499	GTP binding protein 2
gga-miR-138-5p	417992	TOB2	NM_001012534	transducer of ERBB2, 2
gga-miR-138-5p	419138	CEP250	XM_004946946	centrosomal protein 250kDa
gga-miR-138-5p	421018	NETO1	XM_419104	neuropilin (NRP) and tolloid (TLL)-like 1
gga-miR-138-5p	416550	SLC9A3R2	XM_414851	solute carrier family 9, subfamily A (NHE3, cation proton antiporter 3), member 3 regulator 2
gga-miR-138-5p	100859173	LOC100859173	XM_003641130	probable G-protein coupled receptor 83-like
gga-miR-138-5p	101750546	LOC101750546	XM_004935363	circumsporozoite protein-like
gga-miR-138-5p	101747389	LOC101747389	XM_004949583	interferon alpha-14-like
gga-miR-138-5p	420713	ULK4	XM_418812	unc-51-like kinase 4 (C. elegans)
gga-miR-138-5p	100859351	LOC100859351	XM_003642751	prickle-like protein 2-like
gga-miR-138-5p	422169	HSF1	XM_004940527	heat shock transcription factor 1
gga-miR-138-5p	396216	CSF3	NM_205279	colony stimulating factor 3 (granulocyte)
gga-miR-138-5p	421981	FNDC4	XM_419991	fibronectin type III domain containing 4
gga-miR-1457	419618	ZC3H12A	XM_417765	zinc finger CCCH-type containing 12A
gga-miR-1457	770884	ARFIP1	NM_001252398	ADP-ribosylation factor interacting protein 1
gga-miR-1457	424671	MYSM1	NM_001012927	myb-like, SWIRM and MPN domains 1
gga-miR-1457	428859	ELF5	XM_004941539	E74-like factor 5 (ets domain transcription factor)
gga-miR-460b-5p	776097	FBXO39	XM_004946832	F-box protein 39
gga-miR-460b-5p	423774	ANXA8	XM_421646	annexin A8
gga-miR-460b-5p	421915	MYT1L	XM_004940506	myelin transcription factor 1-like
gga-miR-6706-5p	418546	CRYAA	NM_001030797	crystallin, alpha A
gga-miR-6706-5p	426765	APCDD1	NM_001012941	adenomatosis polyposis coli down-regulated 1
gga-miR-6706-5p	418624	PIGA	NM_001030808	phosphatidylinositol glycan anchor biosynthesis, class A
gga-miR-6706-5p	416766	SNAP29	NM_001030652	synaptosomal-associated protein, 29kDa
gga-miR-6706-5p	769783	EIF3B	XM_003642142	eukaryotic translation initiation factor 3, subunit B
gga-miR-6706-5p	420780	TPK1	XM_004935051	thiamin pyrophosphokinase 1
gga-miR-15c-5p	418153	ERC1	XM_416384	ELKS/RAB6-interacting/CAST family member 1
gga-miR-15c-5p	420820	MRS2	XM_418911	MRS2 magnesium homeostasis factor homolog (S. cerevisiae)
gga-miR-15c-5p	423907	VWA2	XM_004942299	von Willebrand factor A domain containing 2
gga-miR-15c-5p	420905	ZCCHC2	XM_418991	zinc finger, CCHC domain containing 2
gga-miR-15c-5p	373961	HDAC1	NM_204156	histone deacetylase 1
gga-miR-15c-5p	422110	TMEM104	NM_001031107	transmembrane protein 104
gga-miR-15c-5p	423192	ATG13	XM_004941598	autophagy related 13
gga-miR-15c-5p	772354	PPP6C	NM_001079765	protein phosphatase 6, catalytic subunit
gga-miR-15c-5p	424645	ZYG11B	XM_422479	zyg-11 homolog B (C. elegans)
gga-miR-15c-5p	770422	CCDC64	XM_003642224	coiled-coil domain containing 64
gga-miR-15c-5p	424347	KIF14	XM_422190	kinesin family member 14
gga-miR-15c-5p	395755	PODXL	NM_001271894	podocalyxin-like
gga-miR-15c-5p	423464	WDR20	XM_004936331	WD repeat domain 20
gga-miR-15c-5p	429678	SLC25A22	NM_001252068	solute carrier family 25 (mitochondrial carrier: glutamate), member 22
gga-miR-15c-5p	100857885	KIAA1549	XM_004937850	KIAA1549
gga-miR-15c-5p	395456	PCSK5	XM_424841	proprotein convertase subtilisin/kexin type 5
gga-miR-15c-5p	418605	RPS6KA3	XM_416804	ribosomal protein S6 kinase, 90kDa, polypeptide 3
gga-miR-15c-5p	427286	CPLX2	XM_424869	complexin 2
gga-miR-1701	421972	ATAD2B	XM_419982	ATPase family, AAA domain containing 2B
gga-miR-1701	428674	RPTOR	XM_004946272	regulatory associated protein of MTOR, complex 1
gga-miR-1701	420664	GPD1L	XM_004939426	glycerol-3-phosphate dehydrogenase 1-like
gga-miR-1628	423242	UBR1	XM_421165	ubiquitin protein ligase E3 component n-recognin 1
gga-miR-1628	423141	TPCN2	XM_003641336	two pore segment channel 2
gga-miR-1628	415444	SLC30A4	XM_003641851	solute carrier family 30 (zinc transporter), member 4
gga-miR-6581-5p	418421	LOC418421	XM_004938296	suppressor of tumorigenicity 14 protein homolog
gga-miR-6581-5p	426894	AQP3	XM_424500	aquaporin 3 (Gill blood group)
gga-miR-138-5p	424964	ATP11B	XM_004943450	ATPase, class VI, type 11B
gga-miR-138-5p	428138	MANBAL	XM_425695	mannosidase, beta A, lysosomal-like
gga-miR-138-5p	101748258	HPDL	XM_004936745	4-hydroxyphenylpyruvate dioxygenase-like
gga-miR-138-5p	378916	LHFPL5	NM_204398	lipoma HMGIC fusion partner-like 5
gga-miR-138-5p	423188	C11ORF49	XM_004941583	chromosome 5 open reading frame, human C11orf49
gga-miR-138-5p	417088	FBXW2	NM_001007842	F-box and WD repeat domain containing 2
gga-miR-138-5p	100859462	LOC100859462	XM_003641958	translation initiation factor IF-2-like
gga-miR-138-5p	422683	SEC24D	XM_004941241	SEC24 family, member D (S. cerevisiae)
gga-miR-138-5p	416592	LOC416592	XM_414892	protein CCSMST1-like
gga-miR-138-5p	421620	STXBP5	XM_004935594	syntaxin binding protein 5 (tomosyn)
gga-miR-1457	769679	LRRC70	XM_004937271	leucine rich repeat containing 70
gga-miR-1457	419514	GFPT1	NM_001030882	glutamine--fructose-6-phosphate transaminase 1
gga-miR-1457	396512	FOS	NM_205508	FBJ murine osteosarcoma viral oncogene homolog
gga-miR-1457	419333	LOC419333	XM_004947237	formin-like protein 16-like
gga-miR-1457	425016	SCHIP1	XM_004943517	schwannomin interacting protein 1
gga-miR-1457	423032	USP47	NM_001199582	ubiquitin specific peptidase 47
gga-miR-6706-5p	421349	SLC30A10	XM_419410	solute carrier family 30, member 10
gga-miR-6706-5p	770250	SLC36A1	XM_001233581	solute carrier family 36 (proton/amino acid symporter), member 1
gga-miR-6706-5p	416611	TMC5	XM_004945296	transmembrane channel-like 5
gga-miR-6706-5p	421632	PLEKHG1	XM_004935616	pleckstrin homology domain containing, family G (with RhoGef domain) member 1
gga-miR-6706-5p	424968	FXR1	NM_001012601	fragile X mental retardation, autosomal homolog 1
gga-miR-6706-5p	417638	RNFT1	XM_004946719	ring finger protein, transmembrane 1
gga-miR-6706-5p	423148	CD59	XM_421075	CD59 molecule, complement regulatory protein
gga-miR-6706-5p	415379	BNIP2	XM_413765	BCL2/adenovirus E1B 19kDa interacting protein 2
gga-miR-6706-5p	768522	GSPT1	NM_001135677	G1 to S phase transition 1
gga-miR-6706-5p	422758	USP46	XM_420711	ubiquitin specific peptidase 46
gga-miR-15c-5p	771074	TTPA	XM_001234375	tocopherol (alpha) transfer protein
gga-miR-15c-5p	416592	LOC416592	XM_414892	protein CCSMST1-like
gga-miR-15c-5p	421564	MLLT4	XM_004935539	myeloid/lymphoid or mixed-lineage leukemia (trithorax homolog, Drosophila); translocated to, 4
gga-miR-15c-5p	421127	LYN	NM_001006390	v-yes-1 Yamaguchi sarcoma viral related oncogene homolog
gga-miR-15c-5p	772061	KCNC2	XM_001235254	potassium voltage-gated channel, Shaw-related subfamily, member 2
gga-miR-15c-5p	422759	SPATA18	XM_420712	spermatogenesis associated 18
gga-miR-15c-5p	427499	TNFAIP8L3	XM_425071	tumor necrosis factor, alpha-induced protein 8-like 3
gga-miR-15c-5p	427164	TRIM23	XM_004937283	tripartite motif containing 23
gga-miR-15c-5p	430912	DUSP28	NM_001271527	dual specificity phosphatase 28
gga-miR-15c-5p	416926	DGCR2	XM_003642212	DiGeorge syndrome critical region gene 2
gga-miR-15c-5p	418825	PCDH17	XM_004938658	protocadherin 17
gga-miR-15c-5p	421810	CASP8AP2	XM_004940380	caspase 8 associated protein 2
gga-miR-15c-5p	420557	FAM133B	NM_001030975	family with sequence similarity 133, member B
gga-miR-1701	416138	CXXC5	XM_414471	CXXC finger protein 5
gga-miR-1701	416487	SMURF1	XM_004945162	SMAD specific E3 ubiquitin protein ligase 1
gga-miR-1701	424842	FARP2	XM_004937018	FERM, RhoGEF and pleckstrin domain protein 2
gga-miR-1701	428887	FBXO33	XM_426443	F-box protein 33
gga-miR-1628	422809	LGI2	NM_001257316	leucine-rich repeat LGI family, member 2
gga-miR-1628	101751564	LOC101751564	XM_004941960	uncharacterized LOC101751564
gga-miR-1628	418229	MPPED1	XM_416454	metallophosphoesterase domain containing 1
gga-miR-1628	430764	DCLRE1C	NM_001031594	DNA cross-link repair 1C
gga-miR-6581-5p	424184	KCNH7	XM_004942820	potassium voltage-gated channel, subfamily H (eag-related), member 7
gga-miR-138-5p	425977	PRCC	XM_423657	papillary renal cell carcinoma (translocation-associated)
gga-miR-138-5p	429131	NEU4	XM_003641732	sialidase 4
gga-miR-138-5p	424241	LOC424241	XM_004942920	uncharacterized LOC424241
gga-miR-138-5p	426813	GRAMD3	XM_004949691	GRAM domain containing 3
gga-miR-138-5p	422936	MAVS	NM_001012893	mitochondrial antiviral signaling protein
gga-miR-138-5p	417746	TRABD	NM_001030732	TraB domain containing
gga-miR-138-5p	424644	FAM159A	XM_004936793	family with sequence similarity 159, member A
gga-miR-138-5p	424719	ERICH3	XM_422545	chromosome 8 open reading frame, human C1orf173
gga-miR-138-5p	416429	SNN	XM_004945088	stannin
gga-miR-138-5p	100857382	LOC100857382	XM_004950639	feather keratin 1-like
gga-miR-138-5p	427507	AGBL1	XM_004943855	ATP/GTP binding protein-like 1
gga-miR-138-5p	424845	PASK	XM_422656	PAS domain containing serine/threonine kinase
gga-miR-138-5p	424862	SLCO2A1	NM_001198927	solute carrier organic anion transporter family, member 2A1
gga-miR-138-5p	416169	LOC416169	XM_004944795	rho GTPase-activating protein 7-like
gga-miR-1457	416304	SPOCK1	XM_004944976	sparc/osteonectin, cwcv and kazal-like domains proteoglycan (testican) 1
gga-miR-1457	423300	NOVA1	NM_001199713	neuro-oncological ventral antigen 1
gga-miR-460b-5p	428005	CLCN4	XM_425575	chloride channel 4
gga-miR-460b-5p	421777	PDSS2	XM_004940341	prenyl (decaprenyl) diphosphate synthase, subunit 2
gga-miR-460b-5p	418212	ITPR2	XM_004938005	inositol 1,4,5-trisphosphate receptor, type 2
gga-miR-6706-5p	424450	EDEM3	XM_004943284	ER degradation enhancer, mannosidase alpha-like 3
gga-miR-6706-5p	423264	EXD2	NM_001199700	exonuclease 3'-5' domain containing 2
gga-miR-6706-5p	421421	SUPT7L	XM_419474	suppressor of Ty 7 (S. cerevisiae)-like
gga-miR-6706-5p	428472	LRRC14B	XM_426030	leucine rich repeat containing 14B
gga-miR-6706-5p	396392	GATA4	XM_420041	GATA binding protein 4
gga-miR-6706-5p	419024	DLG2	XM_004938906	discs, large homolog 2 (Drosophila)
gga-miR-6706-5p	424903	HRASLS	XM_004943333	HRAS-like suppressor
gga-miR-6706-5p	396439	TNS1	NM_205455	tensin 1
gga-miR-6706-5p	395139	ST3GAL2	NM_204480	ST3 beta-galactoside alpha-2,3-sialyltransferase 2
gga-miR-6706-5p	101748609	LOC101748609	XM_004949737	keratin, type I cytoskeletal 9-like
gga-miR-15c-5p	427245	FAM189A2	XM_424828	family with sequence similarity 189, member A2
gga-miR-15c-5p	424110	NBEAL1	XM_004942672	neurobeachin-like 1
gga-miR-15c-5p	768530	PLA2G15	XM_001231518	phospholipase A2, group XV
gga-miR-15c-5p	427914	NT5DC3	XM_425487	5'-nucleotidase domain containing 3
gga-miR-15c-5p	771284	MKX	XM_001233725	mohawk homeobox
gga-miR-15c-5p	418656	PRKX	XM_416852	protein kinase, X-linked
gga-miR-15c-5p	769533	ERC2	XM_004944574	ELKS/RAB6-interacting/CAST family member 2
gga-miR-15c-5p	415914	C12H3ORF18	XM_414260	chromosome 12 open reading frame, human C3orf18
gga-miR-15c-5p	422264	LOC422264	XM_004940704	protocadherin-11 X-linked-like
gga-miR-15c-5p	100857488	LOC100857488	XM_004946223	probable helicase with zinc finger domain-like
gga-miR-15c-5p	416497	C14H17ORF103	NM_001030633	chromosome 14 open reading frame, human C17orf103
gga-miR-15c-5p	770600	KCTD8	XM_001233939	potassium channel tetramerisation domain containing 8
gga-miR-15c-5p	423869	C6H10ORF32	NM_001277369	chromosome 6 open reading frame, human C10orf32
gga-miR-15c-5p	415374	TLN2	XM_004943745	talin 2
gga-miR-15c-5p	420797	SLC12A7	NM_001006371	solute carrier family 12 (potassium/chloride transporters), member 7
gga-miR-15c-5p	423556	MAPK1IP1L	XM_004936482	chromosome 14 open reading frame 32
gga-miR-15c-5p	431602	PTPRD	XM_003642993	protein tyrosine phosphatase, receptor type, D
gga-miR-15c-5p	419960	CDC27	NM_001006331	cell division cycle 27 homolog (S. cerevisiae)
gga-miR-15c-5p	100857276	KIAA1644	XM_003640423	KIAA1644
gga-miR-1701	424463	DPH5	XM_422306	DPH5 homolog (S. cerevisiae)
gga-miR-1701	419042	RAD51AP1	XM_417234	RAD51 associated protein 1
gga-miR-1628	423926	C6H10ORF46	NM_001031238	chromosome 6 open reading frame, human C10orf46
gga-miR-1628	418228	SCUBE1	XM_004938024	signal peptide, CUB domain, EGF-like 1
gga-miR-1628	420693	CDV3	NM_001030990	CDV3 homolog (mouse)
gga-miR-1628	421494	PPPDE1	NM_001008460	PPPDE peptidase domain containing 1
gga-miR-1628	770283	GFOD1	XM_001232577	glucose-fructose oxidoreductase domain containing 1
gga-miR-1628	427963	HTR1F	XM_004938335	5-hydroxytryptamine (serotonin) receptor 1F
gga-miR-1628	417527	UNC45B	XM_004946512	unc-45 homolog B (C. elegans)
gga-miR-6581-5p	415951	IPPK	XM_414295	inositol 1,3,4,5,6-pentakisphosphate 2-kinase
gga-miR-6581-5p	422620	IGFBP7	XM_420577	insulin-like growth factor binding protein 7
gga-miR-6581-5p	424306	ZEB2	XM_422151	zinc finger E-box binding homeobox 2
gga-miR-6581-5p	418246	C1H22ORF40	NM_001030772	chromosome 1 open reading frame, human C22orf40
gga-miR-6581-5p	419615	DNALI1	XM_417762	dynein, axonemal, light intermediate chain 1
gga-miR-6581-5p	423779	ARHGAP22	XM_421651	Rho GTPase activating protein 22
gga-miR-138-5p	419623	THRAP3	NM_001030899	thyroid hormone receptor associated protein 3
gga-miR-138-5p	424545	LPHN2	NM_001190477	latrophilin 2
gga-miR-138-5p	423269	TMEM229B	NM_001012585	transmembrane protein 229B
gga-miR-138-5p	424896	XXYLT1	XM_422707	xyloside xylosyltransferase 1
gga-miR-138-5p	429028	FIGN	XM_004942817	fidgetin
gga-miR-138-5p	419667	FNDC5	XM_417814	fibronectin type III domain containing 5
gga-miR-138-5p	419245	PPDPF	NM_001197037	pancreatic progenitor cell differentiation and proliferation factor homolog (zebrafish)
gga-miR-138-5p	396017	ENO1	NM_205120	enolase 1, (alpha)
gga-miR-138-5p	417583	TAOK1	XM_004946629	TAO kinase 1
gga-miR-138-5p	772083	AGBL4	XM_001235270	ATP/GTP binding protein-like 4
gga-miR-138-5p	424561	LRRC19	XM_422399	leucine rich repeat containing 19
gga-miR-138-5p	100859906	LOC100859906	XM_003642538	CDP-diacylglycerol--serine O-phosphatidyltransferase-like
gga-miR-138-5p	427996	MBTPS2	XM_425566	membrane-bound transcription factor peptidase, site 2
gga-miR-138-5p	768516	OXT	XM_004936280	oxytocin, prepro- (neurophysin I)
gga-miR-1457	101749600	LOC101749600	XM_004942753	coiled-coil domain-containing protein 173-like
gga-miR-1457	427451	RASEF	XM_004949182	RAS and EF-hand domain containing
gga-miR-1457	378903	CREM	NM_001278135	cAMP responsive element modulator
gga-miR-1457	423144	ANO1	XM_004941529	anoctamin 1, calcium activated chloride channel
gga-miR-1457	426797	SNX2	NM_001012607	sorting nexin 2
gga-miR-1457	373925	ARNTL2	NM_204133	aryl hydrocarbon receptor nuclear translocator-like 2
gga-miR-1457	421132	IMPAD1	XM_004939865	inositol monophosphatase domain containing 1
gga-miR-1457	427246	APBA1	XM_004949154	amyloid beta (A4) precursor protein-binding, family A, member 1
gga-miR-460b-5p	423037	MRVI1	XM_004941370	murine retrovirus integration site 1 homolog
gga-miR-460b-5p	418099	MYBPC1	XM_416332	myosin binding protein C, slow type
gga-miR-460b-5p	396442	SRC	NM_205457	v-src sarcoma viral oncogene
gga-miR-460b-5p	422528	LOC422528	XM_420491	cytochrome P450 2U1-like
gga-miR-460b-5p	426725	AQP11	XM_004938940	aquaporin 11
gga-miR-6706-5p	422226	KLHL13	NM_001031116	kelch-like 9 (Drosophila)
gga-miR-6706-5p	419341	TSHZ2	XM_417506	teashirt zinc finger homeobox 2
gga-miR-6706-5p	424088	FAM117B	XM_004942630	family with sequence similarity 117, member B
gga-miR-6706-5p	422719	SORBS2	XM_004935978	sorbin and SH3 domain containing 2
gga-miR-6706-5p	374039	OGN	NM_204209	osteoglycin
gga-miR-6706-5p	422515	FAM13A	XM_420478	family with sequence similarity 13, member A
gga-miR-6706-5p	769506	DGKH	XM_004938671	diacylglycerol kinase, eta
gga-miR-6706-5p	416087	SUCLG2	NM_001006141	succinate-CoA ligase, GDP-forming, beta subunit
gga-miR-6706-5p	419880	HIPK1	XM_004935002	homeodomain interacting protein kinase 1
gga-miR-6706-5p	420529	NMT2	XM_418632	N-myristoyltransferase 2
gga-miR-15c-5p	768899	LRRC15	XM_004943331	leucine rich repeat containing 15
gga-miR-15c-5p	418563	MAOA	NM_001030799	monoamine oxidase A
gga-miR-15c-5p	771271	KCNE4	XM_004937040	potassium voltage-gated channel, Isk-related family, member 4
gga-miR-15c-5p	415987	C12H9ORF89	XM_001232398	chromosome 12 open reading frame, human C9orf89
gga-miR-15c-5p	416982	GCN1L1	XM_003642223	GCN1 general control of amino-acid synthesis 1-like 1 (yeast)
gga-miR-15c-5p	430993	C1QL4	XM_428543	complement component 1, q subcomponent-like 4
gga-miR-15c-5p	421335	AIDA	NM_001277540	axin interactor, dorsalization associated
gga-miR-15c-5p	396237	MYO5A	NM_205300	myosin VA (heavy chain 12, myosin)
gga-miR-15c-5p	424203	FAM134A	XM_422050	family with sequence similarity 134, member A
gga-miR-15c-5p	425087	PHACTR4	XM_422879	phosphatase and actin regulator 4
gga-miR-15c-5p	423850	C6H10ORF76	XM_004942207	chromosome 6 open reading frame, human C10orf76
gga-miR-15c-5p	423331	MIPOL1	XM_004941766	mirror-image polydactyly 1
gga-miR-15c-5p	770646	CREG2	XM_001233981	cellular repressor of E1A-stimulated genes 2
gga-miR-15c-5p	421087	KCTD1	XM_001231830	potassium channel tetramerisation domain containing 1
gga-miR-15c-5p	428078	USP12	XM_425636	ubiquitin specific peptidase 12
gga-miR-15c-5p	424182	COBLL1	XM_004942813	COBL-like 1
gga-miR-15c-5p	420229	DPY19L4	XM_418339	dpy-19-like 4 (C. elegans)
gga-miR-15c-5p	420232	TP53INP1	NM_001030946	tumor protein p53 inducible nuclear protein 1
gga-miR-15c-5p	772198	LOC772198	XM_001235364	uncharacterized LOC772198
gga-miR-15c-5p	100857954	MPEG1	XM_003641374	macrophage expressed 1
gga-miR-15c-5p	427017	PRKAB2	NM_001044662	protein kinase, AMP-activated, beta 2 non-catalytic subunit
gga-miR-15c-5p	422153	PDZD11	NM_001031111	PDZ domain containing 11
gga-miR-1701	416632	CLEC16A	XM_004945310	C-type lectin domain family 16, member A
gga-miR-1628	395765	NPPB	NM_204925	natriuretic peptide B
gga-miR-6581-5p	416719	C3H20ORF72	NM_001277518	chromosome 3 open reading frame, human C20orf72
gga-miR-6581-5p	101747317	LOC101747317	XM_004938446	uncharacterized LOC101747317
gga-miR-6581-5p	420387	SEC22C	XM_004939073	SEC22 vesicle trafficking protein homolog C (S. cerevisiae)
gga-miR-6581-5p	421945	LPIN1	XM_004935773	lipin 1
gga-miR-138-5p	415614	FER	XM_413981	fer (fps/fes related) tyrosine kinase
gga-miR-138-5p	429069	RASAL2	XM_004943248	RAS protein activator like 2
gga-miR-138-5p	420957	C2H9ORF5	XM_419042	chromosome 2 open reading frame, human C9orf5
gga-miR-138-5p	771927	KDELR2	NM_001159715	KDEL (Lys-Asp-Glu-Leu) endoplasmic reticulum protein retention receptor 2
gga-miR-138-5p	100858221	MARVELD1	XM_004942388	MARVEL domain containing 1
gga-miR-138-5p	424528	BCL10	NM_001201487	B-cell CLL/lymphoma 10
gga-miR-138-5p	423779	ARHGAP22	XM_421651	Rho GTPase activating protein 22
gga-miR-138-5p	422985	BET1L	NM_001031173	blocked early in transport 1 homolog (S. cerevisiae)-like
gga-miR-138-5p	396295	BTG1	NM_205350	B-cell translocation gene 1, anti-proliferative
gga-miR-138-5p	776112	LYRM5	XM_004937995	LYR motif containing 5
gga-miR-1457	428769	NDST3	XM_004941244	N-deacetylase/N-sulfotransferase (heparan glucosaminyl) 3
gga-miR-1457	423244	PTGR2	NM_001031195	prostaglandin reductase 2
gga-miR-1457	427447	RICTOR	XM_003642978	RPTOR independent companion of MTOR, complex 2
gga-miR-460b-5p	420325	KCNQ3	XM_003640867	potassium voltage-gated channel, KQT-like subfamily, member 3
gga-miR-460b-5p	418924	SLC46A3	NM_001030828	solute carrier family 46, member 3
gga-miR-460b-5p	418825	PCDH17	XM_004938658	protocadherin 17
gga-miR-460b-5p	420143	SLC35E1	XM_418259	solute carrier family 35, member E1
gga-miR-6706-5p	424830	CAB39	XM_003641738	calcium binding protein 39
gga-miR-6706-5p	769338	DUT	NM_001079488	deoxyuridine triphosphatase
gga-miR-6706-5p	423029	BTBD10	NM_001199575	BTB (POZ) domain containing 10
gga-miR-6706-5p	417438	PRKAR1A	NM_001007845	protein kinase, cAMP-dependent, regulatory, type I, alpha (tissue specific extinguisher 1)
gga-miR-6706-5p	420556	EFCAB1	XM_004939292	EF-hand calcium binding domain 1
gga-miR-6706-5p	100858227	LOC100858227	XM_003643789	interleukin enhancer-binding factor 3-like
gga-miR-6706-5p	418518	TTC3	XM_416727	tetratricopeptide repeat domain 3
gga-miR-15c-5p	100858691	CCDC71	XM_004944627	coiled-coil domain containing 71
gga-miR-15c-5p	422222	PLS3	NM_001006431	plastin 3
gga-miR-15c-5p	424168	LRP2	XM_004942763	low density lipoprotein receptor-related protein 2
gga-miR-15c-5p	418921	UBL3	NM_001012829	ubiquitin-like 3
gga-miR-15c-5p	100857188	TRIM67	XM_003640956	tripartite motif containing 67
gga-miR-15c-5p	418741	ADPRHL1	XM_004938533	ADP-ribosylhydrolase like 1
gga-miR-15c-5p	415977	NUP210	XM_414320	nucleoporin 210kDa
gga-miR-15c-5p	101751836	RNF186	XM_004947482	ring finger protein 186
gga-miR-15c-5p	420109	GATAD2A	NM_001012552	GATA zinc finger domain containing 2A
gga-miR-15c-5p	769604	FAM164A	XM_001232350	family with sequence similarity 164, member A
gga-miR-15c-5p	771961	MKNK1	XM_004936769	MAP kinase interacting serine/threonine kinase 1
gga-miR-15c-5p	423525	PPM1A	XM_421422	protein phosphatase, Mg2+/Mn2+ dependent, 1A
gga-miR-15c-5p	418651	SHROOM2	XM_416847	shroom family member 2
gga-miR-15c-5p	417764	ANKRD26	XM_416008	ankyrin repeat domain 26
gga-miR-15c-5p	422561	GALNT7	XM_420521	UDP-N-acetyl-alpha-D-galactosamine:polypeptide N-acetylgalactosaminyltransferase 7 (GalNAc-T7)
gga-miR-1701	416354	LOC416354	NM_001030624	C-terminal binding protein-like
gga-miR-1701	100736561	PANK4	NM_001244912	pantothenate kinase 4
gga-miR-1628	419097	LRP6	XM_417286	low density lipoprotein receptor-related protein 6
gga-miR-138-5p	418923	MTUS2	XM_417117	microtubule associated tumor suppressor candidate 2
gga-miR-138-5p	408182	CYB5R2	NM_001271982	cytochrome b5 reductase 2
gga-miR-138-5p	419701	HMBS	XM_417846	hydroxymethylbilane synthase
gga-miR-138-5p	395572	FZD3	NM_001271940	frizzled family receptor 3
gga-miR-138-5p	420291	LOC420291	XM_004950640	feather keratin 1-like
gga-miR-138-5p	428208	HIVEP3	XM_004947684	human immunodeficiency virus type I enhancer binding protein 3
gga-miR-138-5p	419969	GFAP	XM_418091	glial fibrillary acidic protein
gga-miR-138-5p	416520	SHMT1	XM_004945205	serine hydroxymethyltransferase 1 (soluble)
gga-miR-138-5p	428973	LZTS2	XM_004942232	leucine zipper, putative tumor suppressor 2
gga-miR-138-5p	415418	LOC415418	XM_429323	uncharacterized LOC415418
gga-miR-138-5p	396409	PTPN2	NM_001199387	protein tyrosine phosphatase, non-receptor type 2
gga-miR-138-5p	427651	RHOT2	NM_001080866	ras homolog family member T2
gga-miR-138-5p	100859810	LOC100859810	XM_003643675	probable ATP-dependent RNA helicase DDX41-like
gga-miR-138-5p	422314	FAM123B	XM_004940780	family with sequence similarity 123B
gga-miR-138-5p	101750199	PALM	NM_204892	paralemmin
gga-miR-138-5p	427935	PHF21B	XM_004938038	PHD finger protein 21B
gga-miR-138-5p	396349	MAP2K2	NM_205388	mitogen-activated protein kinase kinase 2
gga-miR-138-5p	422599	TMEM150C	XM_420558	transmembrane protein 150C
gga-miR-138-5p	770379	LOC770379	XM_001233713	putative small membrane protein NID67-like
gga-miR-1457	421492	HNRNPU	XM_419539	heterogeneous nuclear ribonucleoprotein U (scaffold attachment factor A)
gga-miR-1457	423242	UBR1	XM_421165	ubiquitin protein ligase E3 component n-recognin 1
gga-miR-1457	423250	RBM25	NM_001199684	RNA binding motif protein 25
gga-miR-1457	418964	C1H11ORF87	XM_417157	chromosome 1 open reading frame, human C11orf87
gga-miR-1457	419826	RBBP5	NM_001030914	retinoblastoma binding protein 5
gga-miR-6653-3p	424139	HOXD4	NM_001012293	homeobox D4
gga-miR-460b-5p	396387	NTN3	NM_001277605	netrin 1
gga-miR-6706-5p	771888	LOC771888	XM_001235105	macrophage mannose receptor 1-like
gga-miR-6706-5p	100857704	GMNC	XM_003641789	geminin coiled-coil domain containing
gga-miR-6706-5p	100859766	LOC100859766	XM_003642491	zinc finger protein PLAGL2-like
gga-miR-6706-5p	420199	IMPA1	XM_004939936	inositol(myo)-1(or 4)-monophosphatase 1
gga-miR-6706-5p	423992	ZC3H15	NM_001006510	zinc finger CCCH-type containing 15
gga-miR-6706-5p	415724	TOX3	NM_001277138	TOX high mobility group box family member 3
gga-miR-6706-5p	416729	TMX4	NM_001199408	thioredoxin-related transmembrane protein 4
gga-miR-6706-5p	418449	PTGFRN	XM_416660	prostaglandin F2 receptor negative regulator
gga-miR-6706-5p	421132	IMPAD1	XM_004939865	inositol monophosphatase domain containing 1
gga-miR-15c-5p	100858467	LOC100858467	XM_004946927	endoplasmic reticulum-Golgi intermediate compartment protein 3-like
gga-miR-15c-5p	419257	TPD52L2	NM_001030858	tumor protein D52-like 2
gga-miR-15c-5p	100859383	LOC100859383	XM_003642166	WD repeat-containing protein 90-like
gga-miR-15c-5p	424650	C8H1ORF123	XM_004936804	chromosome 8 open reading frame, human C1orf123
gga-miR-15c-5p	420642	GALNTL2	XM_004939390	UDP-N-acetyl-alpha-D-galactosamine:polypeptide N-acetylgalactosaminyltransferase-like 2
gga-miR-15c-5p	378926	ANKRD1	NM_204405	ankyrin repeat domain 1 (cardiac muscle)
gga-miR-15c-5p	424694	RAVER2	XM_004936868	ribonucleoprotein, PTB-binding 2
gga-miR-15c-5p	427512	DPP8	XM_425086	dipeptidyl-peptidase 8
gga-miR-15c-5p	395116	KCNA10	NM_204462	potassium voltage-gated channel, shaker-related subfamily, member 10
gga-miR-15c-5p	415776	PEPD	NM_001079717	peptidase D
gga-miR-15c-5p	419137	ERGIC3	XM_004946939	ERGIC and golgi 3
gga-miR-15c-5p	419928	CCND3	NM_001008453	cyclin D3
gga-miR-15c-5p	100859339	NPR2	XM_004937147	natriuretic peptide receptor B/guanylate cyclase B (atrionatriuretic peptide receptor B)
gga-miR-1701	418765	ARGLU1	NM_001006267	arginine and glutamate rich 1
gga-miR-1628	423172	CD82	NM_001008470	CD82 molecule
gga-miR-1628	770260	LOC770260	XM_001233590	uncharacterized LOC770260
gga-miR-1628	415453	GABPB1	NM_001012622	GA binding protein transcription factor, beta subunit 1
gga-miR-6581-5p	100857817	LOC100857817	XM_004936256	T-cell surface glycoprotein CD8 alpha chain-like
gga-miR-138-5p	771117	SCARA3	XM_001234415	scavenger receptor class A, member 3
gga-miR-138-5p	101749834	LOC101749834	XM_004945362	orexin receptor type 2-like
gga-miR-138-5p	771410	IGFN1	XM_001234683	immunoglobulin-like and fibronectin type III domain containing 1
gga-miR-138-5p	419681	PPT1	NM_001030903	palmitoyl-protein thioesterase 1
gga-miR-138-5p	769794	SF3B5	XM_001232552	splicing factor 3b, subunit 5, 10kDa
gga-miR-138-5p	418529	RIPK4	XM_004934565	receptor-interacting serine-threonine kinase 4
gga-miR-138-5p	424016	RAMP1	XM_004942470	receptor (G protein-coupled) activity modifying protein 1
gga-miR-138-5p	419042	RAD51AP1	XM_417234	RAD51 associated protein 1
gga-miR-138-5p	101748033	LOC101748033	XM_004937380	translation initiation factor IF-2-like
gga-miR-138-5p	100858515	CLRN2	XM_003641249	clarin 2
gga-miR-138-5p	424835	TRPM2	XM_004937024	transient receptor potential cation channel, subfamily M, member 2
gga-miR-138-5p	423690	TET1	XM_421571	tet oncogene 1
gga-miR-138-5p	416889	FICD	XM_415180	FIC domain containing
gga-miR-138-5p	423986	COL5A2	XM_421846	collagen, type V, alpha 2
gga-miR-138-5p	418266	CASR	XM_416491	calcium-sensing receptor
gga-miR-138-5p	771144	TGM6	XM_001234441	transglutaminase 6
gga-miR-138-5p	395500	MKRN1	NM_204742	makorin ring finger protein 1
gga-miR-1457	416342	NDFIP1	XM_004945038	Nedd4 family interacting protein 1
gga-miR-1457	419109	KIN	XM_004937483	KIN, antigenic determinant of recA protein homolog (mouse)
gga-miR-1457	424504	KIAA1107	XM_004936602	KIAA1107
gga-miR-460b-5p	422649	SLC4A4	XM_420603	solute carrier family 4, sodium bicarbonate cotransporter, member 4
gga-miR-6706-5p	421866	KCNQ5	XM_003640998	potassium voltage-gated channel, KQT-like subfamily, member 5
gga-miR-6706-5p	396424	PLAU	NM_205443	plasminogen activator, urokinase
gga-miR-6706-5p	418761	ARHGEF7	XM_004938543	Rho guanine nucleotide exchange factor (GEF) 7
gga-miR-6706-5p	417677	XAF1	XM_004946815	XIAP associated factor 1
gga-miR-6706-5p	420006	MPP2	XM_003642818	membrane protein, palmitoylated 2 (MAGUK p55 subfamily member 2)
gga-miR-6706-5p	424108	ABI2	XM_004942663	abl-interactor 2
gga-miR-6706-5p	395412	ITPR1	NM_001174059	inositol 1,4,5-trisphosphate receptor, type 1
gga-miR-6706-5p	423261	SLC39A9	NM_001007933	solute carrier family 39 (zinc transporter), member 9
gga-miR-6706-5p	416567	PRKCB	XM_414868	protein kinase C, beta
gga-miR-6706-5p	421412	CRIPT	NM_001031054	cysteine-rich PDZ-binding protein
gga-miR-15c-5p	424036	MCM3AP	XM_421891	minichromosome maintenance complex component 3 associated protein
gga-miR-15c-5p	101749949	LOC101749949	XM_004950115	PHD finger protein 7-like
gga-miR-15c-5p	421366	TATDN3	XM_004935331	TatD DNase domain containing 3
gga-miR-15c-5p	424758	PLEKHB2	NM_001031302	pleckstrin homology domain containing, family B (evectins) member 2
gga-miR-15c-5p	419547	CEP85	XM_004947669	centrosomal protein 85kDa
gga-miR-15c-5p	396230	HOXB4	NM_205293	homeobox B4
gga-miR-15c-5p	769188	FAM161A	XM_001232413	family with sequence similarity 161, member A
gga-miR-15c-5p	418526	BACE2	XM_416735	beta-site APP-cleaving enzyme 2
gga-miR-15c-5p	421544	CAPN9	XM_419585	calpain 9
gga-miR-15c-5p	420758	GOLGA4	XM_418856	golgin A4
gga-miR-15c-5p	423116	PPP6R3	NM_001031183	protein phosphatase 6, regulatory subunit 3
gga-miR-15c-5p	415961	ATG7	NM_001030592	autophagy related 7
gga-miR-15c-5p	421627	LATS1	XM_004935606	LATS, large tumor suppressor, homolog 1 (Drosophila)
gga-miR-15c-5p	417992	TOB2	NM_001012534	transducer of ERBB2, 2
gga-miR-15c-5p	428971	LOC428971	XM_004942224	solute carrier family 2, facilitated glucose transporter member 9-like
gga-miR-15c-5p	418449	PTGFRN	XM_416660	prostaglandin F2 receptor negative regulator
gga-miR-15c-5p	414897	MLL	XM_004948054	myeloid/lymphoid or mixed-lineage leukemia (trithorax homolog, Drosophila)
gga-miR-15c-5p	429353	SNX11	XM_004948569	sorting nexin 11
gga-miR-15c-5p	426890	KIAA1328	NM_001031404	KIAA1328
gga-miR-15c-5p	420701	LIMD1	XM_418800	LIM domains containing 1
gga-miR-1701	415893	NISCH	XM_414245	nischarin
gga-miR-1701	373854	ODZ2	NM_204097	odz, odd Oz/ten-m homolog 2 (Drosophila)
gga-miR-1628	396405	CAMKK2	XM_415134	calcium/calmodulin-dependent protein kinase kinase 2, beta
gga-miR-1628	396154	VLDLR	NM_205229	very low density lipoprotein receptor
gga-miR-1628	423516	SYT16	XM_421415	synaptotagmin XVI
gga-miR-1628	428580	ZNF238	XM_426137	zinc finger protein 238
gga-miR-6581-5p	419040	C1H12ORF5	XM_004938072	chromosome 1 open reading frame, human C12orf5
gga-miR-138-5p	427107	ARRDC3	XM_424699	arrestin domain containing 3
gga-miR-138-5p	101751325	LOC101751325	XM_004935113	uncharacterized LOC101751325
gga-miR-138-5p	423416	CPSF2	NM_001031208	cleavage and polyadenylation specific factor 2, 100kDa
gga-miR-138-5p	100859039	LOC100859039	NM_001277759	feather keratin 1-like
gga-miR-138-5p	424715	ANKRD13C	XM_430177	ankyrin repeat domain 13C
gga-miR-138-5p	421303	LCLAT1	NM_001031039	lysocardiolipin acyltransferase 1
gga-miR-138-5p	417492	SPNS2	XM_004946444	spinster homolog 2 (Drosophila)
gga-miR-138-5p	424597	MMACHC	NM_001031281	methylmalonic aciduria (cobalamin deficiency) cblC type, with homocystinuria
gga-miR-1457	419040	C1H12ORF5	XM_004938072	chromosome 1 open reading frame, human C12orf5
gga-miR-1457	420471	EPC1	XM_004939175	enhancer of polycomb homolog 1 (Drosophila)
gga-miR-1457	422476	LRBA	XM_003641176	LPS-responsive vesicle trafficking, beach and anchor containing
gga-miR-1457	427259	LOC427259	XM_424842	riboflavin kinase-like
gga-miR-1457	417722	FAM185A	XM_415967	family with sequence similarity 185, member A
gga-miR-460b-5p	427175	SERINC5	XM_424762	serine incorporator 5
gga-miR-460b-5p	424735	STAG1	XM_004936924	stromal antigen 1
gga-miR-6706-5p	416502	MPRIP	XM_004945187	myosin phosphatase Rho interacting protein
gga-miR-6706-5p	425121	KLHL5	XM_422912	kelch-like 5 (Drosophila)
gga-miR-6706-5p	100859545	LOC100859545	XM_003640857	potassium channel subfamily K member 9-like
gga-miR-6706-5p	428913	ZBTB42	XM_426468	zinc finger and BTB domain containing 42
gga-miR-6706-5p	416686	IL15RA	XM_004937430	interleukin 15 receptor, alpha
gga-miR-6706-5p	423825	GPR123	XM_421695	G protein-coupled receptor 123
gga-miR-6706-5p	396254	TUBB	NM_205315	tubulin, beta class I
gga-miR-6706-5p	426852	LOC426852	XM_004949003	mucosa-associated lymphoid tissue lymphoma translocation protein 1 homolog
gga-miR-6706-5p	418971	ELMOD1	XM_001233927	ELMO/CED-12 domain containing 1
gga-miR-6706-5p	419589	LDLRAP1	XM_417736	low density lipoprotein receptor adaptor protein 1
gga-miR-6706-5p	426413	SCAMP5	XM_424061	secretory carrier membrane protein 5
gga-miR-6706-5p	417829	GNS	NM_001199559	glucosamine (N-acetyl)-6-sulfatase
gga-miR-6706-5p	416560	E4F1	XM_414860	E4F transcription factor 1
gga-miR-6706-5p	422960	SYT4	XM_420894	synaptotagmin IV
gga-miR-15c-5p	423483	APOPT1	XM_421388	apoptogenic 1
gga-miR-15c-5p	419546	UBXN11	XM_417696	UBX domain protein 11
gga-miR-15c-5p	422557	ODZ3	NM_001198537	odz, odd Oz/ten-m homolog 3 (Drosophila)
gga-miR-15c-5p	420190	JPH1	XM_418302	junctophilin 1
gga-miR-15c-5p	417647	CA4	XM_415893	carbonic anhydrase IV
gga-miR-15c-5p	776143	HOXA10	XM_001235692	homeobox A10
gga-miR-15c-5p	427381	DGKQ	XM_424953	diacylglycerol kinase, theta 110kDa
gga-miR-15c-5p	418599	APOO	XM_416798	apolipoprotein O
gga-miR-15c-5p	418784	MBNL2	NM_001163374	muscleblind-like 2 (Drosophila)
gga-miR-15c-5p	395417	SIK1	NM_204682	salt-inducible kinase 1
gga-miR-15c-5p	772026	RPH3AL	XM_001235227	rabphilin 3A-like (without C2 domains)
gga-miR-15c-5p	428016	SOWAHC	XM_004938553	sosondowah ankyrin repeat domain family member C
gga-miR-15c-5p	424638	BTF3L4	NM_001031285	basic transcription factor 3-like 4
gga-miR-1701	416893	CORO1C	NM_001277869	coronin, actin binding protein, 1C
gga-miR-1701	769595	WTIP	XM_001232878	Wilms tumor 1 interacting protein
gga-miR-1701	417187	FNBP1	XM_004945871	formin binding protein 1
gga-miR-1628	769402	PKIB	XM_001232003	protein kinase (cAMP-dependent, catalytic) inhibitor beta
gga-miR-1628	417960	GPRC5A	XM_416200	G protein-coupled receptor, family C, group 5, member A
gga-miR-1628	419856	CD34	XM_004934975	CD34 molecule
gga-miR-1628	430664	SGSM1	XM_003642204	small G protein signaling modulator 1
gga-miR-1628	100858463	DTHD1	XM_003641216	death domain containing 1
gga-miR-1628	422236	FAM122B	XM_003641104	family with sequence similarity 122B
gga-miR-6581-5p	428574	C6ORF137	XM_426130	transmembrane protein 151B
gga-miR-6581-5p	422460	HHIP	XM_420424	hedgehog interacting protein
gga-miR-6581-5p	422169	HSF1	XM_004940527	heat shock transcription factor 1
gga-miR-138-5p	101747831	AKNAD1	XM_004943094	AKNA domain containing 1
gga-miR-138-5p	418215	TM7SF3	XM_004938011	transmembrane 7 superfamily member 3
gga-miR-138-5p	776390	ACPP	XM_004939446	acid phosphatase, prostate
gga-miR-138-5p	426773	EIF4EBP1	XM_004947588	eukaryotic translation initiation factor 4E binding protein 1
gga-miR-138-5p	419085	MYO7A	XM_004938941	myosin VIIA
gga-miR-138-5p	428716	SLC16A2	XM_426274	solute carrier family 16, member 2 (thyroid hormone transporter)
gga-miR-138-5p	415947	RBM5	NM_001012780	RNA binding motif protein 5
gga-miR-138-5p	768976	STARD8	XM_004940536	StAR-related lipid transfer (START) domain containing 8
gga-miR-138-5p	422347	LOC422347	XM_003641084	insulin receptor substrate 2-B-like
gga-miR-138-5p	428972	SFXN3	XM_004942231	sideroflexin 3
gga-miR-138-5p	420057	SLC1A6	XM_004948655	solute carrier family 1 (high affinity aspartate/glutamate transporter), member 6
gga-miR-138-5p	424163	FASTKD1	XM_422009	FAST kinase domains 1
gga-miR-1457	420214	CPNE3	XM_418324	copine III
gga-miR-1457	768530	PLA2G15	XM_001231518	phospholipase A2, group XV
gga-miR-1457	428907	AK7	XM_426462	adenylate kinase 7
gga-miR-1457	420253	RRM2B	XM_418364	ribonucleotide reductase M2 B (TP53 inducible)
gga-miR-1457	421329	TP53BP2	XM_004935301	tumor protein p53 binding protein, 2
gga-miR-1457	418821	DIS3	XM_417016	DIS3 mitotic control homolog (S. cerevisiae)
gga-miR-1457	768915	SPO11	XM_004947223	SPO11 meiotic protein covalently bound to DSB homolog (S. cerevisiae)
gga-miR-460b-5p	419583	YTHDF2	XM_004947713	YTH domain family, member 2
gga-miR-6706-5p	421355	GPATCH2	NM_001031046	G patch domain containing 2
gga-miR-6706-5p	423156	SLC1A2	NM_001012899	solute carrier family 1 (glial high affinity glutamate transporter), member 2
gga-miR-6706-5p	428025	HS6ST3	XM_003640546	heparan sulfate 6-O-sulfotransferase 3
gga-miR-6706-5p	416919	ZNRF3	XM_415210	zinc and ring finger 3
gga-miR-6706-5p	421260	KIF16B	XM_419330	kinesin family member 16B
gga-miR-6706-5p	425302	KIRREL	XM_004948175	kin of IRRE like (Drosophila)
gga-miR-6706-5p	421282	EHBP1	XM_003640912	EH domain binding protein 1
gga-miR-6706-5p	772279	SLC24A4	XM_001235437	solute carrier family 24 (sodium/potassium/calcium exchanger), member 4
gga-miR-6706-5p	418721	TMEM182	XM_004938509	transmembrane protein 182
gga-miR-6706-5p	416971	MLEC	XM_415264	malectin
gga-miR-6706-5p	416352	JAKMIP2	XM_004945054	janus kinase and microtubule interacting protein 2
gga-miR-6706-5p	423721	H2AFY2	NM_001277338	H2A histone family, member Y2
gga-miR-6706-5p	373887	FZD4	NM_204099	frizzled family receptor 4
gga-miR-6706-5p	431253	TACC1	XM_004947595	transforming, acidic coiled-coil containing protein 1
gga-miR-6706-5p	771781	TBC1D20	XM_001235014	TBC1 domain family, member 20
gga-miR-6706-5p	100534590	STON1	NM_001204865	stonin 1
gga-miR-6706-5p	415655	NUTF2	NM_001030562	nuclear transport factor 2
gga-miR-15c-5p	427139	SLC38A9	XM_004937244	solute carrier family 38, member 9
gga-miR-15c-5p	415992	DCP1A	XM_004944567	DCP1 decapping enzyme homolog A (S. cerevisiae)
gga-miR-15c-5p	424856	UBXN7	XM_004937003	UBX domain protein 7
gga-miR-15c-5p	772226	CC2D1B	XM_001235392	coiled-coil and C2 domain containing 1B
gga-miR-15c-5p	421279	PELI1	NM_001012872	pellino homolog 1 (Drosophila)
gga-miR-15c-5p	422415	RXFP1	XM_420385	relaxin/insulin-like family peptide receptor 1
gga-miR-15c-5p	427205	GFM2	XM_424792	G elongation factor, mitochondrial 2
gga-miR-15c-5p	770169	LRRN3	XM_001232593	leucine rich repeat neuronal 3
gga-miR-15c-5p	423359	EIF2B2	NM_001006481	eukaryotic translation initiation factor 2B, subunit 2 beta, 39kDa
gga-miR-15c-5p	418612	PHKA2	XM_004934687	phosphorylase kinase, alpha 2 (liver)
gga-miR-15c-5p	427138	PPAP2A	XM_424730	phosphatidic acid phosphatase type 2A
gga-miR-15c-5p	422778	SLC30A9	XM_004936076	solute carrier family 30 (zinc transporter), member 9
gga-miR-15c-5p	395231	HOXA3	NM_204548	homeobox A3
gga-miR-15c-5p	428500	FAM173B	XM_004935125	family with sequence similarity 173, member B
gga-miR-15c-5p	418861	RCBTB2	XM_004938703	regulator of chromosome condensation (RCC1) and BTB (POZ) domain containing protein 2
gga-miR-15c-5p	427431	RAI14	XM_425003	retinoic acid induced 14
gga-miR-15c-5p	422744	AASDH	XM_004936016	aminoadipate-semialdehyde dehydrogenase
gga-miR-1701	395754	NEUROD1	NM_204920	neurogenic differentiation 1
gga-miR-1701	420724	CLASP2	NM_001177385	cytoplasmic linker associated protein 2
gga-miR-1701	423374	GSTZ1	NM_001277470	glutathione S-transferase zeta 1
gga-miR-1628	777548	HOXB6	XM_001236989	homeobox B6
gga-miR-1628	770747	FAM83F	XM_004937719	family with sequence similarity 83, member F
gga-miR-1628	429131	NEU4	XM_003641732	sialidase 4
gga-miR-1628	424542	PRKACB	XM_004936659	protein kinase, cAMP-dependent, catalytic, beta
gga-miR-1628	418879	ATP7B	XM_417073	ATPase, Cu++ transporting, beta polypeptide
gga-miR-1628	503574	SNRNP200	NM_001012701	small nuclear ribonucleoprotein 200kDa (U5)
gga-miR-1628	101747869	LOC101747869	XM_004941554	myb-related transcription factor, partner of profilin-like
gga-miR-6581-5p	427279	LNPEP	XM_424862	leucyl/cystinyl aminopeptidase
gga-miR-6581-5p	424266	PARP14	XM_422113	poly (ADP-ribose) polymerase family, member 14
gga-miR-6581-5p	420653	UBE2E1	XM_004939407	ubiquitin-conjugating enzyme E2E 1 (UBC4/5 homolog, yeast)
gga-miR-6581-5p	424191	ITGB6	XM_004942825	integrin, beta 6
gga-miR-138-5p	427836	FAM57A	XM_425410	family with sequence similarity 57, member A
gga-miR-138-5p	100858637	LOC100858637	XM_004945037	protein sprouty homolog 4-like
gga-miR-138-5p	421706	ARHGAP18	XM_419743	Rho GTPase activating protein 18
gga-miR-138-5p	416879	ACAD10	XM_004945600	acyl-Coenzyme A dehydrogenase family, member 10
gga-miR-138-5p	424110	NBEAL1	XM_004942672	neurobeachin-like 1
gga-miR-138-5p	426287	MMAB	XM_004945627	methylmalonic aciduria (cobalamin deficiency) cblB type
gga-miR-138-5p	100859502	LOC100859502	XM_003643880	leukocyte immunoglobulin-like receptor subfamily A member 2-like
gga-miR-138-5p	423073	USH1C	XM_004941411	Usher syndrome 1C (autosomal recessive, severe)
gga-miR-138-5p	419988	ABI3	XM_004948560	ABI family, member 3
gga-miR-138-5p	417996	ZC3H7B	XM_004937705	zinc finger CCCH-type containing 7B
gga-miR-138-5p	101748605	LOC101748605	XM_004949433	PHD finger protein 7-like
gga-miR-138-5p	395573	SOX10	NM_204792	SRY (sex determining region Y)-box 10
gga-miR-138-5p	101747856	LOC101747856	XM_004949422	translation initiation factor IF-2-like
gga-miR-138-5p	101748496	LOC101748496	XM_004949431	PHD finger protein 7-like
gga-miR-138-5p	101751091	LOC101751091	XM_004936247	protein RMD5 homolog A-like
gga-miR-138-5p	395395	GAD2	XM_418596	glutamate decarboxylase 2 (pancreatic islets and brain, 65kDa)
gga-miR-138-5p	415683	PDPR	XM_414050	pyruvate dehydrogenase phosphatase regulatory subunit
gga-miR-138-5p	395160	LOC395160	NM_204499	transcription factor Crx
gga-miR-1457	422930	EIF2AK3	XM_420868	eukaryotic translation initiation factor 2-alpha kinase 3
gga-miR-1457	417111	RBM18	XM_415396	RNA binding motif protein 18
gga-miR-1457	771008	EN1	XM_001234328	engrailed homeobox 1
gga-miR-1457	415990	BICD2	XM_004944558	bicaudal D homolog 2 (Drosophila)
gga-miR-1457	418898	ALG5	XM_417093	asparagine-linked glycosylation 5, dolichyl-phosphate beta-glucosyltransferase homolog (S. cerevisiae)
gga-miR-1457	420444	RBM33	XM_004939156	RNA binding motif protein 33
gga-miR-1457	422960	SYT4	XM_420894	synaptotagmin IV
gga-miR-460b-5p	420995	STX17	NM_001031009	syntaxin 17
gga-miR-460b-5p	416225	FAF2	XM_414548	Fas associated factor family member 2
gga-miR-6706-5p	421755	AMD1	NM_001012569	adenosylmethionine decarboxylase 1
gga-miR-6706-5p	421650	ARID1B	XM_001232095	AT rich interactive domain 1B (SWI1-like)
gga-miR-6706-5p	416902	ANKRD13A	XM_415193	ankyrin repeat domain 13A
gga-miR-6706-5p	422793	C4ORF34	XM_420745	chromosome 4 open reading frame, human C4orf34
gga-miR-6706-5p	417631	GDPD1	XM_415876	glycerophosphodiester phosphodiesterase domain containing 1
gga-miR-6706-5p	415316	NPTN	XM_413703	neuroplastin
gga-miR-6706-5p	770701	KLHL25	XM_004943857	kelch-like 25 (Drosophila)
gga-miR-6706-5p	419814	KCTD20	XM_004934888	potassium channel tetramerisation domain containing 20
gga-miR-6706-5p	416153	PWWP2A	XM_414485	PWWP domain containing 2A
gga-miR-6706-5p	771446	TCFL5	XM_001234726	transcription factor-like 5 (basic helix-loop-helix)
gga-miR-15c-5p	427880	WBP11	XM_425454	WW domain binding protein 11
gga-miR-15c-5p	421819	RNGTT	XM_419843	RNA guanylyltransferase and 5'-phosphatase
gga-miR-15c-5p	771869	FBXL20	XM_001235090	F-box and leucine-rich repeat protein 20
gga-miR-15c-5p	418101	TBXAS1	XM_416334	thromboxane A synthase 1 (platelet)
gga-miR-15c-5p	420397	GJC2	NM_001199581	gap junction protein, gamma 12, 47kDa
gga-miR-15c-5p	415951	IPPK	XM_414295	inositol 1,3,4,5,6-pentakisphosphate 2-kinase
gga-miR-15c-5p	425539	METTL11A	NM_001277688	methyltransferase like 11A
gga-miR-15c-5p	422945	C4H20ORF194	XM_420883	chromosome 4 open reading frame, human C20orf194
gga-miR-15c-5p	420703	CDCP1	XM_418802	CUB domain containing protein 1
gga-miR-15c-5p	101751058	LOC101751058	XM_004948155	olfactory receptor 2T7-like
gga-miR-15c-5p	427320	ZCCHC9	XM_424900	zinc finger, CCHC domain containing 9
gga-miR-15c-5p	422896	WHSC2	NM_001031167	Wolf-Hirschhorn syndrome candidate 2
gga-miR-15c-5p	417093	PBX3	NM_001030678	pre-B-cell leukemia homeobox 3
gga-miR-15c-5p	424820	NMNAT3	XM_004937036	nicotinamide nucleotide adenylyltransferase 3
gga-miR-15c-5p	422842	WDR1	NM_001004402	WD repeat domain 1
gga-miR-15c-5p	427919	BICD1	XM_004937881	bicaudal D homolog 1 (Drosophila)
gga-miR-15c-5p	396061	FASN	NM_205155	fatty acid synthase
gga-miR-15c-5p	769954	NDUFB4	XM_001233270	NADH dehydrogenase (ubiquinone) 1 beta subcomplex, 4, 15kDa
gga-miR-15c-5p	423163	TRAF6	XM_004941545	TNF receptor-associated factor 6, E3 ubiquitin protein ligase
gga-miR-15c-5p	422295	LOC422295	XM_004940746	uncharacterized LOC422295
gga-miR-15c-5p	422807	PI4K2B	NM_001031157	phosphatidylinositol 4-kinase type 2 beta
gga-miR-15c-5p	421994	RAB10	NM_001031097	RAB10, member RAS oncogene family
gga-miR-15c-5p	770416	C9ORF140	XM_004945739	chromosome 17 open reading frame, human C9orf140
gga-miR-15c-5p	426826	DMBT1L	XM_424435	deleted in malignant brain tumors 1 protein-like
gga-miR-15c-5p	416245	NIPAL4	XM_004944917	NIPA-like domain containing 4
gga-miR-1701	419628	AGO3	NM_001030900	eukaryotic translation initiation factor 2C, 3
gga-miR-1701	418353	ZDHHC23	NM_001012819	zinc finger, DHHC-type containing 23
gga-miR-1701	772022	KCNK16	XM_001235223	potassium channel, subfamily K, member 16
gga-miR-1701	100858227	LOC100858227	XM_003643789	interleukin enhancer-binding factor 3-like
gga-miR-1628	423169	ALKBH3	NM_001282377	alkB, alkylation repair homolog 3 (E. coli)
gga-miR-1628	424001	MAP2	XM_004942441	microtubule-associated protein 2
gga-miR-1628	427917	KIAA1147	XM_425490	KIAA1147
gga-miR-1628	429163	ARHGEF26	XM_426718	Rho guanine nucleotide exchange factor (GEF) 26
gga-miR-6581-5p	420483	RAB18	NM_001006355	RAB18, member RAS oncogene family
gga-miR-6581-5p	423505	ZBTB25	XM_421407	zinc finger and BTB domain containing 25
gga-miR-138-5p	426248	CBX2	XM_423911	chromobox homolog 2
gga-miR-138-5p	428801	FOXI3	XM_426357	forkhead box I3
gga-miR-138-5p	395716	EYA4	XM_004935733	eyes absent homolog 4 (Drosophila)
gga-miR-138-5p	416304	SPOCK1	XM_004944976	sparc/osteonectin, cwcv and kazal-like domains proteoglycan (testican) 1
gga-miR-138-5p	427029	LOC427029	XM_004950732	uncharacterized LOC427029
gga-miR-138-5p	421430	ZFAND3	XM_419483	zinc finger, AN1-type domain 3
gga-miR-138-5p	396018	CHST3	NM_205121	carbohydrate (chondroitin 6) sulfotransferase 3
gga-miR-138-5p	396250	ETS2	NM_205312	v-ets erythroblastosis virus E26 oncogene homolog 2
gga-miR-138-5p	101747800	LOC101747800	XM_004949421	translation initiation factor IF-2-like
gga-miR-138-5p	416591	GNPTG	NM_001277566	N-acetylglucosamine-1-phosphate transferase, gamma subunit
gga-miR-138-5p	429070	ASTN1	XM_004943259	astrotactin 1
gga-miR-138-5p	423485	XRCC3	NM_001006489	X-ray repair complementing defective repair in Chinese hamster cells 3
gga-miR-138-5p	101748055	LOC101748055	XM_004949425	PHD finger protein 7-like
gga-miR-138-5p	772082	PLA2G12A	XM_001235269	phospholipase A2, group XIIA
gga-miR-138-5p	428237	IGSF9B	XM_004948000	immunoglobulin superfamily, member 9B
gga-miR-138-5p	416204	STK10	XM_414529	serine/threonine kinase 10
gga-miR-138-5p	418081	CHST11	XM_004937823	carbohydrate (chondroitin 4) sulfotransferase 11
gga-miR-138-5p	101747920	LOC101747920	XM_004949423	translation initiation factor IF-2-like
gga-miR-138-5p	425717	ABTB2	XM_423445	ankyrin repeat and BTB (POZ) domain containing 2
gga-miR-138-5p	101747649	LOC101747649	XM_004949420	PHD finger protein 7-like
gga-miR-138-5p	422377	FAM199X	XM_003641087	family with sequence similarity 199, X-linked
gga-miR-138-5p	426627	SH3TC2	XM_424256	SH3 domain and tetratricopeptide repeats 2
gga-miR-138-5p	770483	CZH9orf85	XM_001233820	chromosome Z open reading frame, human C9orf85
gga-miR-138-5p	418787	DNAJC3	NM_001008437	DnaJ (Hsp40) homolog, subfamily C, member 3
gga-miR-138-5p	396122	B4GALT2	NM_205203	UDP-Gal:betaGlcNAc beta 1,4- galactosyltransferase, polypeptide 2
gga-miR-138-5p	101750933	LOC101750933	XM_004949436	PHD finger protein 7-like
gga-miR-138-5p	416688	ANKRD16	NM_001199314	ankyrin repeat domain 16
gga-miR-138-5p	424740	LOC424740	NM_001031300	uncharacterized LOC424740
gga-miR-1457	427245	FAM189A2	XM_424828	family with sequence similarity 189, member A2
gga-miR-1457	421192	XPO1	NM_001290134	exportin 1 (CRM1 homolog, yeast)
gga-miR-1457	418193	BCAT1	XM_416424	branched chain amino-acid transaminase 1, cytosolic
gga-miR-1457	395126	USP7	NM_204471	ubiquitin specific peptidase 7 (herpes virus-associated)
gga-miR-1457	416210	BOD1	XM_414535	biorientation of chromosomes in cell division 1
gga-miR-1457	417639	MED13	XM_004946720	mediator complex subunit 13
gga-miR-1457	417667	MSI2	XM_415912	musashi homolog 2 (Drosophila)
gga-miR-1457	768655	PIM3	XM_003640342	pim-3 oncogene
gga-miR-1457	424699	LEPROT	NM_001007958	leptin receptor overlapping transcript
gga-miR-460b-5p	772163	PTPRQ	XM_004937590	protein tyrosine phosphatase, receptor type, Q
gga-miR-460b-5p	421243	CRNKL1	XM_419315	crooked neck pre-mRNA splicing factor-like 1 (Drosophila)
gga-miR-460b-5p	421577	PARK2	XM_004935558	parkinson protein 2, E3 ubiquitin protein ligase (parkin)
gga-miR-6706-5p	101747367	LOC101747367	XM_004936656	uricase-like
gga-miR-6706-5p	427297	HOOK3	XM_003643039	hook homolog 3 (Drosophila)
gga-miR-6706-5p	416470	TTYH3	XM_414776	tweety homolog 3 (Drosophila)
gga-miR-6706-5p	422642	SDAD1	XM_420597	SDA1 domain containing 1
gga-miR-6706-5p	374079	OPTN	NM_204236	optineurin
gga-miR-6706-5p	427723	RNFT2	XM_004934486	ring finger protein, transmembrane 2
gga-miR-6706-5p	416808	SLC15A4	XM_415099	solute carrier family 15, member 4
gga-miR-6706-5p	423618	OGDHL	NM_001199544	oxoglutarate dehydrogenase-like
gga-miR-6706-5p	100857774	CEP85L	XM_003641033	centrosomal protein 85kDa-like
gga-miR-6706-5p	769655	TMEM184A	XM_001232942	transmembrane protein 184A
gga-miR-6706-5p	101749501	FAM196B	XM_004944784	family with sequence similarity 196, member B
gga-miR-15c-5p	424515	LRRC8C	XM_422353	leucine rich repeat containing 8 family, member C
gga-miR-15c-5p	395941	HGF	NM_001030370	hepatocyte growth factor (hepapoietin A; scatter factor)
gga-miR-15c-5p	417644	PPM1D	XM_415890	protein phosphatase, Mg2+/Mn2+ dependent, 1D
gga-miR-15c-5p	419317	VAPB	NM_001006296	VAMP (vesicle-associated membrane protein)-associated protein B and C
gga-miR-15c-5p	422765	FRYL	XM_004936046	FRY-like
gga-miR-15c-5p	428566	SYT14	XM_004935339	synaptotagmin XIV
gga-miR-15c-5p	424830	CAB39	XM_003641738	calcium binding protein 39
gga-miR-15c-5p	420249	SPAG1	XM_418360	sperm associated antigen 1
gga-miR-15c-5p	422889	ZFYVE28	XM_004936224	zinc finger, FYVE domain containing 28
gga-miR-15c-5p	417757	AASS	XM_416001	aminoadipate-semialdehyde synthase
gga-miR-15c-5p	416451	ADAP1	XM_414759	ArfGAP with dual PH domains 1
gga-miR-15c-5p	423187	ARFGAP2	NM_001033871	ADP-ribosylation factor GTPase activating protein 2
gga-miR-15c-5p	101748311	LOC101748311	XM_004938722	uncharacterized LOC101748311
gga-miR-15c-5p	417661	HEATR6	XM_415906	HEAT repeat containing 6
gga-miR-15c-5p	426919	TMEM161B	XM_004949415	transmembrane protein 161B
gga-miR-15c-5p	395716	EYA4	XM_004935733	eyes absent homolog 4 (Drosophila)
gga-miR-15c-5p	421899	CSMD1	XM_419917	CUB and Sushi multiple domains 1
gga-miR-15c-5p	422423	MSMO1	NM_001006438	methylsterol monooxygenase 1
gga-miR-15c-5p	421762	FIG4	NM_001114623	FIG4 homolog, SAC1 lipid phosphatase domain containing (S. cerevisiae)
gga-miR-15c-5p	421132	IMPAD1	XM_004939865	inositol monophosphatase domain containing 1
gga-miR-15c-5p	421027	TMX3	XM_419113	thioredoxin-related transmembrane protein 3
gga-miR-15c-5p	415593	ZNF280D	XM_413961	zinc finger protein 280D
gga-miR-15c-5p	768548	C12ORF34	XM_001231227	chromosome 15 open reading frame, human C12orf34
gga-miR-15c-5p	420622	MPP6	XM_004939352	membrane protein, palmitoylated 6 (MAGUK p55 subfamily member 6)
gga-miR-15c-5p	770638	COX11	XM_001233972	COX11 cytochrome c oxidase assembly homolog (yeast)
gga-miR-15c-5p	415959	SLC6A11	XM_414302	solute carrier family 6 (neurotransmitter transporter, GABA), member 11
gga-miR-15c-5p	420462	PITRM1	XM_418564	pitrilysin metallopeptidase 1
gga-miR-1701	771980	FAM78A	XM_001233856	family with sequence similarity 78, member A
gga-miR-1701	431262	FEM1C	XM_004949686	fem-1 homolog c (C. elegans)
gga-miR-1701	427839	KSR1	XM_425413	kinase suppressor of ras 1
gga-miR-1701	396451	PTGS2	NM_001167718	prostaglandin-endoperoxide synthase 2 (prostaglandin G/H synthase and cyclooxygenase)
gga-miR-1628	419734	SNX19	XM_003642598	sorting nexin 19
gga-miR-1628	420797	SLC12A7	NM_001006371	solute carrier family 12 (potassium/chloride transporters), member 7
gga-miR-1628	395463	FOXK1	XM_414784	forkhead box K1
gga-miR-1628	426413	SCAMP5	XM_424061	secretory carrier membrane protein 5
gga-miR-1628	415924	GMPPB	XM_004944429	GDP-mannose pyrophosphorylase B
gga-miR-6581-5p	418895	TRPC4	XM_417089	transient receptor potential cation channel, subfamily C, member 4
gga-miR-6581-5p	418989	TRPC6	XM_004938840	transient receptor potential cation channel, subfamily C, member 6
gga-miR-6581-5p	100857462	RAPGEF5	XM_003640687	Rap guanine nucleotide exchange factor (GEF) 5
gga-miR-138-5p	424744	NGEF	NM_001010841	neuronal guanine nucleotide exchange factor
gga-miR-138-5p	100858067	LOC100858067	XM_003643151	potassium voltage-gated channel subfamily A member 6-like
gga-miR-138-5p	428278	LOC428278	XM_004948498	myosin light chain kinase, smooth muscle-like
gga-miR-138-5p	426415	LHPP	XM_004942343	phospholysine phosphohistidine inorganic pyrophosphate phosphatase
gga-miR-138-5p	100858942	LOC100858942	XM_003643124	glucagon-like
gga-miR-138-5p	427808	RAB11FIP4	XM_425379	RAB11 family interacting protein 4 (class II)
gga-miR-138-5p	422353	LOC422353	XM_004940816	synaptotagmin-like protein 2-like
gga-miR-138-5p	415681	COG4	NM_001012775	component of oligomeric golgi complex 4
gga-miR-138-5p	769972	DCP2	XM_004949273	DCP2 decapping enzyme homolog (S. cerevisiae)
gga-miR-138-5p	428719	CXORF56	XM_003641123	chromosome 4 open reading frame, human CXorf56
gga-miR-138-5p	422897	WHSC1	XM_420839	Wolf-Hirschhorn syndrome candidate 1
gga-miR-1457	417734	ZBED4	NM_001199541	zinc finger, BED-type containing 4
gga-miR-1457	424114	PIKFYVE	XM_004942677	phosphoinositide kinase, FYVE finger containing
gga-miR-1457	420577	MIOS	XM_418678	missing oocyte, meiosis regulator, homolog (Drosophila)
gga-miR-1457	428185	B3GALT6	XM_004947428	UDP-Gal:betaGal beta 1,3-galactosyltransferase polypeptide 6
gga-miR-1457	421430	ZFAND3	XM_419483	zinc finger, AN1-type domain 3
gga-miR-460b-5p	395793	TBX19	NM_204950	T-box 19
gga-miR-460b-5p	428096	PRCP	XM_425654	prolylcarboxypeptidase (angiotensinase C)
gga-miR-460b-5p	424920	KIAA0226	XM_004943357	KIAA0226
gga-miR-460b-5p	395313	MX1	NM_204609	myxovirus (influenza virus) resistance 1, interferon-inducible protein p78 (mouse)
gga-miR-460b-5p	427126	MEGF10	XM_424719	multiple EGF-like-domains 10
gga-miR-6706-5p	396210	NFIA	NM_205273	nuclear factor I/A
gga-miR-6706-5p	429119	MSL2	XM_426675	male-specific lethal 2 homolog (Drosophila)
gga-miR-6706-5p	415367	HERC1	XM_004943736	HECT and RLD domain containing E3 ubiquitin protein ligase family member 1
gga-miR-6706-5p	418099	MYBPC1	XM_416332	myosin binding protein C, slow type
gga-miR-6706-5p	416003	ASB14	XM_414345	ankyrin repeat and SOCS box containing 14
gga-miR-6706-5p	424227	CYP27C1	XM_004942891	cytochrome P450, family 27, subfamily C, polypeptide 1
gga-miR-6706-5p	373918	ACTN1	NM_204127	actinin, alpha 1
gga-miR-6706-5p	421375	LPGAT1	NM_001031049	lysophosphatidylglycerol acyltransferase 1
gga-miR-6706-5p	408182	CYB5R2	NM_001271982	cytochrome b5 reductase 2
gga-miR-6706-5p	771550	EPHA2	XM_004947473	EPH receptor A2
gga-miR-6706-5p	422465	ZNF827	XM_004940965	zinc finger protein 827
gga-miR-6706-5p	420570	PDK4	NM_001199909	pyruvate dehydrogenase kinase, isozyme 4
gga-miR-6706-5p	424000	NCKAP1	XM_004942425	NCK-associated protein 1
gga-miR-15c-5p	415878	ZNF821	XM_004944348	zinc finger protein 821
gga-miR-15c-5p	421533	C1ORF96	XM_419574	chromosome 3 open reading frame, human C1orf96
gga-miR-15c-5p	420321	NDRG1	XM_418430	N-myc downstream regulated 1
gga-miR-15c-5p	395170	RGS9BP	NM_204505	regulator of G protein signaling 9 binding protein
gga-miR-15c-5p	424301	LRP1B	XM_422146	low density lipoprotein receptor-related protein 1B
gga-miR-15c-5p	776112	LYRM5	XM_004937995	LYR motif containing 5
gga-miR-15c-5p	426218	LOC426218	NM_001277927	claw keratin-like
gga-miR-15c-5p	419837	SLC41A1	XM_417968	solute carrier family 41, member 1
gga-miR-15c-5p	427986	ZNF295	XM_004934577	zinc finger protein 295
gga-miR-15c-5p	417649	MYO19	XM_415895	myosin XIX
gga-miR-15c-5p	416414	RRN3	NM_001277156	RRN3 RNA polymerase I transcription factor homolog (S. cerevisiae)
gga-miR-15c-5p	422503	PARM1	XM_429964	prostate androgen-regulated mucin-like protein 1
gga-miR-15c-5p	395730	KCNAB1	NM_204906	potassium voltage-gated channel, shaker-related subfamily, beta member 1
gga-miR-15c-5p	425829	TET3	XM_003642554	tet oncogene family member 3
gga-miR-15c-5p	395946	SCN9A	XM_004942783	sodium channel, voltage-gated, type IX, alpha subunit
gga-miR-15c-5p	429072	RFWD2	XM_004943261	ring finger and WD repeat domain 2, E3 ubiquitin protein ligase
gga-miR-15c-5p	419971	CCDC43	NM_001007884	coiled-coil domain containing 43
gga-miR-15c-5p	424900	OPA1	NM_001039309	optic atrophy 1 (autosomal dominant)
gga-miR-15c-5p	419055	RNF169	XM_417246	ring finger protein 169
gga-miR-15c-5p	431260	ZBTB5	XM_004949710	zinc finger and BTB domain containing 5
gga-miR-15c-5p	100857889	LOC100857889	XM_003642932	PI-PLC X domain-containing protein 3-like
gga-miR-15c-5p	421951	GEN1	XM_004935778	Gen endonuclease homolog 1 (Drosophila)
gga-miR-15c-5p	419964	MAP3K14	NM_001030927	mitogen-activated protein kinase kinase kinase 14
gga-miR-15c-5p	395945	SCN2A	XM_004942788	sodium channel, voltage-gated, type II, alpha subunit
gga-miR-15c-5p	421902	CLN8	NM_001031087	ceroid-lipofuscinosis, neuronal 8 (epilepsy, progressive with mental retardation)
gga-miR-15c-5p	421773	OSTM1	NM_001031077	osteopetrosis associated transmembrane protein 1
gga-miR-15c-5p	417296	MAN1B1	XM_415569	mannosidase, alpha, class 1B, member 1
gga-miR-15c-5p	423608	WAPAL	NM_001199511	wings apart-like homolog (Drosophila)
gga-miR-1701	430336	SMARCD3	XM_427895	SWI/SNF related, matrix associated, actin dependent regulator of chromatin, subfamily d, member 3
gga-miR-1701	415325	LOC415325	XM_429316	uncharacterized LOC415325
gga-miR-1701	427434	DNAJC21	XM_425006	DnaJ (Hsp40) homolog, subfamily C, member 21
gga-miR-1701	418437	CRYBG3	XM_003640472	beta-gamma crystallin domain containing 3
gga-miR-1701	427913	SLC41A2	NM_001031483	solute carrier family 41, member 2
gga-miR-1701	424865	IGF2BP2	XM_003641746	insulin-like growth factor 2 mRNA binding protein 2
gga-miR-1628	421210	CCDC88A	XM_004940105	coiled-coil domain containing 88A
gga-miR-1628	428952	HIF1AN	XM_426507	hypoxia inducible factor 1, alpha subunit inhibitor
gga-miR-1628	769188	FAM161A	XM_001232413	family with sequence similarity 161, member A
gga-miR-1628	420992	LOC420992	XM_429803	uncharacterized LOC420992
gga-miR-1628	424415	XPR1	XM_003641660	xenotropic and polytropic retrovirus receptor 1
gga-miR-1628	418540	WDR4	XM_416749	WD repeat domain 4
gga-miR-6581-5p	428210	LUZP1	XM_004947702	leucine zipper protein 1
gga-miR-6581-5p	771297	SCN4A	XM_004948509	sodium channel, voltage-gated, type IV, alpha subunit
gga-miR-138-5p	416198	RELL2	XM_414524	RELT-like 2
gga-miR-138-5p	422932	SUCLG1	NM_001012892	succinate-CoA ligase, alpha subunit
gga-miR-138-5p	416502	MPRIP	XM_004945187	myosin phosphatase Rho interacting protein
gga-miR-138-5p	101750984	PLEKHG3	XM_004941260	pleckstrin homology domain containing, family G (with RhoGef domain) member 3
gga-miR-138-5p	427294	IDUA	NM_001031433	iduronidase, alpha-L-
gga-miR-138-5p	416678	UBE2H	NM_001030647	ubiquitin-conjugating enzyme E2H
gga-miR-138-5p	423482	BAG5	NM_001031211	BCL2-associated athanogene 5
gga-miR-138-5p	418835	AKAP11	XM_004938675	A kinase (PRKA) anchor protein 11
gga-miR-138-5p	776543	C3ORF24	XM_004939538	chromosome 2 open reading frame, human C3orf24
gga-miR-138-5p	423107	RASSF7	XM_004941472	Ras association (RalGDS/AF-6) domain family (N-terminal) member 7
gga-miR-138-5p	416745	ADCK3	NM_001199413	aarF domain containing kinase 3
gga-miR-138-5p	427438	NADKD1	XM_425010	NAD kinase domain containing 1
gga-miR-138-5p	770288	C15ORF27	XM_001233622	chromosome 10 open reading frame, human C15orf27
gga-miR-138-5p	423503	BRF1	XM_004936421	BRF1 homolog, subunit of RNA polymerase III transcription initiation factor IIIB (S. cerevisiae)
gga-miR-1457	426314	SUV39H2	NM_001031370	suppressor of variegation 3-9 homolog 2 (Drosophila)
gga-miR-1457	417508	PRKRIP1	NM_001006214	PRKR interacting protein 1 (IL11 inducible)
gga-miR-1457	418373	SFT2D2	XM_416592	SFT2 domain containing 2
gga-miR-6653-3p	429710	JUP	NM_001267553	junction plakoglobin
gga-miR-460b-5p	421000	CNO	XM_419086	cappuccino homolog (mouse)
gga-miR-460b-5p	422663	ANKRD50	XM_420618	ankyrin repeat domain 50
gga-miR-6706-5p	421812	LYRM2	NM_001278053	LYR motif containing 2
gga-miR-6706-5p	421777	PDSS2	XM_004940341	prenyl (decaprenyl) diphosphate synthase, subunit 2
gga-miR-6706-5p	416704	EIF4A3	NM_001030649	eukaryotic translation initiation factor 4A3
gga-miR-6706-5p	426045	TBL1X	NM_001159754	transducin (beta)-like 1X-linked
gga-miR-6706-5p	424577	KLF1	XM_004936714	Kruppel-like factor 1 (erythroid)
gga-miR-6706-5p	424701	TCTEX1D1	XM_422530	Tctex1 domain containing 1
gga-miR-6706-5p	418189	LOC418189	XM_416420	solute carrier organic anion transporter family member 1C1-like
gga-miR-6706-5p	418952	IFT88	XM_004938812	intraflagellar transport 88 homolog (Chlamydomonas)
gga-miR-6706-5p	771145	MAPK13	XM_001234442	mitogen-activated protein kinase 13
gga-miR-6706-5p	418891	PROSER1	XM_417085	proline and serine rich 1
gga-miR-6706-5p	416104	CRBN	XM_004944713	cereblon
gga-miR-6706-5p	101750817	LOC101750817	XM_004951034	deleted in malignant brain tumors 1 protein-like
gga-miR-15c-5p	428425	CALCR	XM_425985	calcitonin receptor
gga-miR-15c-5p	417377	MYO15L	XM_004946139	myosin-XV-like
gga-miR-15c-5p	426680	SMEK2	XM_424305	SMEK homolog 2, suppressor of mek1 (Dictyostelium)
gga-miR-15c-5p	428674	RPTOR	XM_004946272	regulatory associated protein of MTOR, complex 1
gga-miR-15c-5p	421050	MOG	XM_004939729	myelin oligodendrocyte glycoprotein
gga-miR-15c-5p	396187	MYO1F	NM_205254	myosin IF
gga-miR-15c-5p	418370	C1H1ORF114	XM_416589	chromosome 1 open reading frame, human C1orf114
gga-miR-15c-5p	419221	C20H20ORF177	XM_004947078	chromosome 20 open reading frame, human C20orf177
gga-miR-15c-5p	423373	POMT2	XM_004941825	protein-O-mannosyltransferase 2
gga-miR-15c-5p	427985	B3GALT5	XM_004934555	UDP-Gal:betaGlcNAc beta 1,3-galactosyltransferase, polypeptide 5
gga-miR-15c-5p	419633	NCDN	NM_001030901	neurochondrin
gga-miR-15c-5p	424597	MMACHC	NM_001031281	methylmalonic aciduria (cobalamin deficiency) cblC type, with homocystinuria
gga-miR-15c-5p	427640	TRIM69	XM_425213	tripartite motif containing 69
gga-miR-15c-5p	427007	ANKS4B	XM_424609	ankyrin repeat and sterile alpha motif domain containing 4B
gga-miR-15c-5p	416038	TMEM43	XM_414378	transmembrane protein 43
gga-miR-15c-5p	417180	LAMC3	XM_004945884	laminin, gamma 3
gga-miR-15c-5p	422802	RBPJ	XM_004936139	recombination signal binding protein for immunoglobulin kappa J region
gga-miR-15c-5p	423050	NRIP3	XM_420983	nuclear receptor interacting protein 3
gga-miR-15c-5p	419200	FITM2	XM_417378	fat storage-inducing transmembrane protein 2
gga-miR-15c-5p	418255	RIMKLB	XM_004938100	ribosomal modification protein rimK-like family member B
gga-miR-15c-5p	421801	KLHL32	XM_004940364	kelch-like 32 (Drosophila)
gga-miR-15c-5p	417366	ACOX1	NM_001006205	acyl-CoA oxidase 1, palmitoyl
gga-miR-15c-5p	429081	HIAT1	NM_001031562	hippocampus abundant transcript 1
gga-miR-15c-5p	427705	ADORA2A	XM_425280	adenosine A2a receptor
gga-miR-15c-5p	423847	LCOR	XM_421716	ligand dependent nuclear receptor corepressor
gga-miR-15c-5p	100857587	DAPK2	XM_004943728	death-associated protein kinase 2
gga-miR-15c-5p	771533	SLC39A11	XM_001234801	solute carrier family 39 (metal ion transporter), member 11
gga-miR-1701	418337	VANGL1	XM_004938190	vang-like 1 (van gogh, Drosophila)
[truncated: 1,057 more rows]
