# Supplementary material for: ALV-miRNA-p19-01 Promotes Viral Replication via Targeting Dual Specificity Phosphatase 6
Source: Viruses. 2022 Apr 13;14(4):805. doi: 10.3390/v14040805 (PMC9024826; doi:10.3390/v14040805)
Supplement: Supplementary file 1 [file viruses-14-00805-s001.zip › Table S3.xlsx]

## Sheet: up.positive_vs_negative
positive vs negative.up Fold Change cutoff: 2.0 p-value cutoff: 1.0 FPKM >= 0.1 in at least one sample Column A: gene, the gene name. Column B: gene_id, the Ensembl gene identifier. Column C: biotype, protein_coding. Column D: strand, transcription direction. Column E: locus, genomic locus. chromosome: start-end. Column F ~ G, FPKM value of each sample. Column H: fold change, fold change between …
positive vs negative up-regulated genes
gene	gene_id	biotype	strand	locus	positive_FPKM	negative_FPKM	Fold change	log2(fold change)	p_value	FDR	Regulation	GeneID	Synonyms	dbXrefs	chromosome	map_location	description	pathway	GO-CC	GO-MF	GO-BP
FAM195A	ENSGALG00000000040	protein_coding	+	chr14:13563685-13566890	3.35808	0.912839	3.67871	1.8792	1	1	up	425184	C16orf14	CGNC:17	14	-	family with sequence similarity 195, member A
-	ENSGALG00000000048	protein_coding	+	chr25:2183825-2189333	0.243008	0	inf	inf	1	1	up
TUBB3	ENSGALG00000000059	protein_coding	+	chr11:18290820-18292152	0.404818	0	inf	inf	1	1	up	431043	-	CGNC:54120	11	-	tubulin beta 3 class III	gga04145(Phagosome)//gga04540(Gap junction)
-	ENSGALG00000000104	protein_coding	-	chr26:1061355-1078330	0.565213	0	inf	inf	1	1	up
DENND2D	ENSGALG00000000154	protein_coding	+	chr26:1012133-1019461	0.955718	0	inf	inf	1	1	up	421153	-	CGNC:81|Ensembl:ENSGALG00000000154	26	-	DENN domain containing 2D
ISOC1	ENSGALG00000000161	protein_coding	-	chrZ:45425105-45444170	2.35881	0.480883	4.90516	2.2943	1	1	up	415601	-	CGNC:86|Ensembl:ENSGALG00000000161	Z	-	isochorismatase domain containing 1		GO:0070062(extracellular exosome)//GO:0005737(cytoplasm)	GO:0003824(catalytic activity)	GO:0008152(metabolic process)
-	ENSGALG00000000193	protein_coding	+	chr27:106492-114485	0.985588	0.114892	8.57841	3.10071	1	1	up
RASSF2	ENSGALG00000000206	protein_coding	+	chr22:413641-425903	0.523746	0.142452	3.67665	1.87839	1	1	up	419521	-	CGNC:51021|Ensembl:ENSGALG00000030432	22	-	Ras association domain family member 2				GO:0042981(regulation of apoptotic process)//GO:0007165(signal transduction)
PRNP	ENSGALG00000000209	protein_coding	-	chr22:431947-436437	0.203189	0	inf	inf	1	1	up	396452	Prn-p|prp	CGNC:118|Ensembl:ENSGALG00000000209	22	-	prion protein		GO:0005886(plasma membrane)//GO:0070062(extracellular exosome)//GO:0009986(cell surface)//GO:0031965(nuclear membrane)//GO:0005623(cell)//GO:0030425(dendrite)//GO:0031225(anchored component of membrane)//GO:0005794(Golgi apparatus)//GO:0043083(synaptic cleft)//GO:0005829(cytosol)//GO:0005783(endoplasmic reticulum)//GO:0045121(membrane raft)//GO:0016234(inclusion body)//GO:0005605(basal lamina)//G…	GO:1903135(cupric ion binding)//GO:0002020(protease binding)//GO:0032403(protein complex binding)//GO:0031802(type 5 metabotropic glutamate receptor binding)//GO:0001540(amyloid-beta binding)//GO:0004871(signal transducer activity)//GO:0005507(copper ion binding)//GO:0042802(identical protein binding)//GO:0004872(receptor activity)//GO:0005539(glycosaminoglycan binding)//GO:1903136(cuprous ion bi…	GO:0051260(protein homooligomerization)//GO:0006979(response to oxidative stress)//GO:0010628(positive regulation of gene expression)//GO:0043066(negative regulation of apoptotic process)//GO:1902938(regulation of intracellular calcium activated chloride channel activity)//GO:0090314(positive regulation of protein targeting to membrane)//GO:0046007(negative regulation of activated T cell prolifer…
MGAT4C	ENSGALG00000000225	protein_coding	-	chr26:893410-901876	0.440248	0	inf	inf	1	1	up	427873	GNT-VI|gnT-IVc	Ensembl:ENSGALG00000028360	1	-	MGAT4 family member C	gga00510(N-Glycan biosynthesis)//gga01100(Metabolic pathways)	GO:0016020(membrane)//GO:0016021(integral component of membrane)//GO:0000139(Golgi membrane)	GO:0016758(transferase activity, transferring hexosyl groups)//GO:0046872(metal ion binding)//GO:0008454(alpha-1,3-mannosylglycoprotein 4-beta-N-acetylglucosaminyltransferase activity)	GO:0005975(carbohydrate metabolic process)//GO:0006486(protein glycosylation)
TMEM9	ENSGALG00000000226	protein_coding	+	chr26:893410-901876	0.877173	0.357847	2.45125	1.29352	1	1	up	421157	-	CGNC:128|Ensembl:ENSGALG00000000226	26	-	transmembrane protein 9		GO:0016021(integral component of membrane)
6	ENSGALG00000000253	protein_coding	-	chrZ:46646707-46660697	11.6553	3.3563	3.47266	1.79604	0.0169	0.994263	up
IGFN1	ENSGALG00000000295	protein_coding	-	chr26:853959-876469	0.215329	0	inf	inf	1	1	up	771410	-	CGNC:56754	26	-	immunoglobulin-like and fibronectin type III domain containing 1
TNNI1	ENSGALG00000000313	protein_coding	+	chr26:774173-777490	1.00835	0	inf	inf	1	1	up	421161	-	CGNC:184	26	-	troponin I type 1 (skeletal, slow)		GO:0005861(troponin complex)		GO:0055010(ventricular cardiac muscle tissue morphogenesis)//GO:0014883(transition between fast and slow fiber)//GO:0003009(skeletal muscle contraction)//GO:0060048(cardiac muscle contraction)
NEFL	ENSGALG00000000314	protein_coding	+	chr22:944237-949102	0.211758	0	inf	inf	1	1	up	419528	-	CGNC:185|Ensembl:ENSGALG00000000314	22	-	neurofilament, light polypeptide		GO:0005883(neurofilament)//GO:1904115(axon cytoplasm)//GO:0043209(myelin sheath)//GO:0033596(TSC1-TSC2 complex)	GO:0030674(protein binding, bridging)//GO:0008022(protein C-terminus binding)//GO:0005200(structural constituent of cytoskeleton)//GO:0042802(identical protein binding)	GO:0019896(axonal transport of mitochondrion)//GO:0040011(locomotion)//GO:0031133(regulation of axon diameter)//GO:0043524(negative regulation of neuron apoptotic process)//GO:0014012(peripheral nervous system axon regeneration)//GO:0033693(neurofilament bundle assembly)//GO:0000226(microtubule cytoskeleton organization)//GO:0050885(neuromuscular process controlling balance)//GO:0048812(neuron pr…
PIGV	ENSGALG00000000324	protein_coding	-	chr23:21425-24856	4.86473	0.992172	4.90312	2.2937	0.13825	0.994263	up	771632	-	CGNC:190|Ensembl:ENSGALG00000039883	23	-	phosphatidylinositol glycan anchor biosynthesis class V	gga00563(Glycosylphosphatidylinositol(GPI)-anchor biosynthesis)//gga01100(Metabolic pathways)	GO:0016021(integral component of membrane)//GO:0005789(endoplasmic reticulum membrane)	GO:0004584(dolichyl-phosphate-mannose-glycolipid alpha-mannosyltransferase activity)	GO:0097502(mannosylation)//GO:0006506(GPI anchor biosynthetic process)
JAC	ENSGALG00000000341	protein_coding	-	chr25:766675-767730	106.199	47.4908	2.23619	1.16104	0.0157	0.994263	up
-	ENSGALG00000000407	protein_coding	-	chr28:551927-556784	0.555746	0	inf	inf	1	1	up
chPKCI	ENSGALG00000000428	protein_coding	+	chrZ:44758625-44762622	33.8181	12.9178	2.61794	1.38843	0.08085	0.994263	up
-	ENSGALG00000000443	protein_coding	-	chr25:205887-214237	0.753594	0	inf	inf	1	1	up
MRPS21	ENSGALG00000000456	protein_coding	-	chr25:1561762-1563334	27.5651	6.5997	4.17672	2.06237	0.1025	0.994263	up	426666	-	CGNC:52856|Ensembl:ENSGALG00000000456	25	-	mitochondrial ribosomal protein S21	gga03010(Ribosome)	GO:0044391(ribosomal subunit)//GO:0005743(mitochondrial inner membrane)	GO:0003735(structural constituent of ribosome)	GO:0006412(translation)
LCK	ENSGALG00000000466	protein_coding	-	chr23:5090136-5095478	0.27655	0	inf	inf	1	1	up	396460	P56LCK|tkl	CGNC:49815|Ensembl:ENSGALG00000000466	23	-	LCK proto-oncogene, Src family tyrosine kinase		GO:0001772(immunological synapse)//GO:0031234(extrinsic component of cytoplasmic side of plasma membrane)//GO:0045121(membrane raft)//GO:0000242(pericentriolar material)//GO:0070062(extracellular exosome)	GO:0019903(protein phosphatase binding)//GO:0004713(protein tyrosine kinase activity)//GO:0019901(protein kinase binding)//GO:0005102(receptor binding)//GO:0042802(identical protein binding)//GO:0042610(CD8 receptor binding)//GO:0043548(phosphatidylinositol 3-kinase binding)//GO:0004715(non-membrane spanning protein tyrosine kinase activity)//GO:0004722(protein serine/threonine phosphatase activi…	GO:0007169(transmembrane receptor protein tyrosine kinase signaling pathway)//GO:0042493(response to drug)//GO:0045087(innate immune response)//GO:0018108(peptidyl-tyrosine phosphorylation)//GO:0038083(peptidyl-tyrosine autophosphorylation)//GO:0042127(regulation of cell proliferation)//GO:0016477(cell migration)//GO:0030217(T cell differentiation)//GO:2001244(positive regulation of intrinsic apo…
PNPLA1	ENSGALG00000000477	protein_coding	+	chr26:1462431-1464531	0.652105	0	inf	inf	1	1	up	428259	-	CGNC:296	26	-	patatin-like phospholipase domain containing 1
ETV7	ENSGALG00000000504	protein_coding	-	chr26:1482960-1487317	0.530727	0	inf	inf	1	1	up	419813	-	CGNC:308|Ensembl:ENSGALG00000000504	26	-	ETS variant 7	gga04320(Dorso-ventral axis formation)	GO:0005654(nucleoplasm)//GO:0005634(nucleus)	GO:0000981(RNA polymerase II transcription factor activity, sequence-specific DNA binding)//GO:0001227(transcriptional repressor activity, RNA polymerase II transcription regulatory region sequence-specific binding)//GO:0000977(RNA polymerase II regulatory region sequence-specific DNA binding)	GO:0006357(regulation of transcription from RNA polymerase II promoter)//GO:0030154(cell differentiation)//GO:0000122(negative regulation of transcription from RNA polymerase II promoter)
-	ENSGALG00000000514	protein_coding	+	chr21:171132-212641	7.51031	0.556688	13.491	3.75393	0.252	0.994263	up
-	ENSGALG00000000530	protein_coding	-	chr21:171132-212641	0.387227	0	inf	inf	1	1	up
ZNF593	ENSGALG00000000542	protein_coding	-	chr23:239320-240520	14.534	4.18139	3.47586	1.79737	0.14455	0.994263	up	419549	-	CGNC:337|Ensembl:ENSGALG00000000542	23	-	zinc finger protein 593		GO:0005730(nucleolus)//GO:0030687(preribosome, large subunit precursor)//GO:0005829(cytosol)	GO:0003676(nucleic acid binding)//GO:0031177(phosphopantetheine binding)//GO:0043023(ribosomal large subunit binding)//GO:0008270(zinc ion binding)//GO:0000036(ACP phosphopantetheine attachment site binding involved in fatty acid biosynthetic process)//GO:0000035(acyl binding)	GO:0009245(lipid A biosynthetic process)//GO:1903026(negative regulation of RNA polymerase II regulatory region sequence-specific DNA binding)//GO:0045944(positive regulation of transcription from RNA polymerase II promoter)//GO:0000055(ribosomal large subunit export from nucleus)
LAPTM5	ENSGALG00000000562	protein_coding	-	chr23:267868-281554	0.634803	0	inf	inf	1	1	up	419552	-	CGNC:351|Ensembl:ENSGALG00000038636	23	-	lysosomal protein transmembrane 5	gga04142(Lysosome)	GO:0005765(lysosomal membrane)//GO:0005887(integral component of plasma membrane)		GO:0006810(transport)
PTPN7	ENSGALG00000000600	protein_coding	-	chr26:353422-358969	0.18737	0	inf	inf	1	1	up	770905	-	CGNC:371|Ensembl:ENSGALG00000036093	26	-	protein tyrosine phosphatase, non-receptor type 7	gga04010(MAPK signaling pathway)		GO:0004725(protein tyrosine phosphatase activity)	GO:0035335(peptidyl-tyrosine dephosphorylation)
CHTF8	ENSGALG00000000632	protein_coding	-	chr11:18358801-18360418	10.582	2.58901	4.08728	2.03114	0.09845	0.994263	up	769609	-	CGNC:55390|Ensembl:ENSGALG00000000632	11	-	chromosome transmission fidelity factor 8		GO:0031390(Ctf18 RFC-like complex)		GO:0007064(mitotic sister chromatid cohesion)
CNTN2	ENSGALG00000000653	protein_coding	+	chr26:1920858-1944417	0.107807	0	inf	inf	1	1	up	419825	AXONIN-1|contactin-2	CGNC:412|Ensembl:ENSGALG00000000653	26	-	contactin 2	gga04514(Cell adhesion molecules (CAMs))	GO:0005886(plasma membrane)//GO:0043209(myelin sheath)//GO:0009986(cell surface)//GO:0031225(anchored component of membrane)//GO:0033268(node of Ranvier)//GO:0008076(voltage-gated potassium channel complex)//GO:0044224(juxtaparanode region of axon)//GO:0043025(neuronal cell body)	GO:0043621(protein self-association)//GO:0050839(cell adhesion molecule binding)//GO:0030246(carbohydrate binding)	GO:0007628(adult walking behavior)//GO:0021853(cerebral cortex GABAergic interneuron migration)//GO:0007411(axon guidance)//GO:0010954(positive regulation of protein processing)//GO:0007158(neuron cell-cell adhesion)//GO:0022010(central nervous system myelination)//GO:0097090(presynaptic membrane organization)//GO:0048168(regulation of neuronal synaptic plasticity)//GO:0007413(axonal fasciculatio…
EDN2	ENSGALG00000000667	protein_coding	+	chr23:950278-955659	0.634341	0.258806	2.45103	1.29339	1	1	up	419559	endothelin-2	CGNC:421|Ensembl:ENSGALG00000000667	23	-	endothelin 2		GO:0005622(intracellular)//GO:0005615(extracellular space)	GO:0031708(endothelin B receptor binding)//GO:0005179(hormone activity)	GO:0008284(positive regulation of cell proliferation)//GO:0042116(macrophage activation)//GO:0019722(calcium-mediated signaling)//GO:0001516(prostaglandin biosynthetic process)//GO:0045987(positive regulation of smooth muscle contraction)//GO:0048016(inositol phosphate-mediated signaling)//GO:0002690(positive regulation of leukocyte chemotaxis)//GO:0097009(energy homeostasis)//GO:0007204(positive…
GDPD4	ENSGALG00000000690	protein_coding	+	chr1:192319668-192353227	0.165154	0	inf	inf	1	1	up	419084	-	CGNC:436|Ensembl:ENSGALG00000000690	1	-	glycerophosphodiester phosphodiesterase domain containing 4		GO:0016021(integral component of membrane)	GO:0008889(glycerophosphodiester phosphodiesterase activity)	GO:0006629(lipid metabolic process)
MFSD4	ENSGALG00000000695	protein_coding	+	chr26:2119308-2132518	0.605376	0	inf	inf	1	1	up
RAB29	ENSGALG00000000712	protein_coding	-	chr26:2222665-2225961	21.817	9.27729	2.35166	1.23368	0.13965	0.994263	up
RPA2	ENSGALG00000000734	protein_coding	-	chr23:1455973-1459771	10.9582	4.46965	2.4517	1.29378	0.08645	0.994263	up	419566	-	CGNC:51031|Ensembl:ENSGALG00000000734	23	-	replication protein A2	gga03030(DNA replication)//gga03420(Nucleotide excision repair)//gga03430(Mismatch repair)//gga03440(Homologous recombination)//gga03460(Fanconi anemia pathway)	GO:0005634(nucleus)	GO:0003677(DNA binding)	GO:0006310(DNA recombination)//GO:0006281(DNA repair)//GO:0006260(DNA replication)
-	ENSGALG00000000789	protein_coding	+	chr25:1746787-1963328	0.474198	0	inf	inf	1	1	up
VPS72	ENSGALG00000000793	protein_coding	-	chr25:1746787-1963328	0.400434	0	inf	inf	1	1	up	425660	-	CGNC:509|Ensembl:ENSGALG00000000793	25	-	vacuolar protein sorting-associated protein 72 homolog		GO:0043234(protein complex)//GO:0005634(nucleus)//GO:0016607(nuclear speck)	GO:0042393(histone binding)	GO:0043486(histone exchange)//GO:0006355(regulation of transcription, DNA-templated)//GO:0035019(somatic stem cell population maintenance)
MAPK13	ENSGALG00000000826	protein_coding	+	chr26:159808-170262	2.68551	1.0952	2.45207	1.294	1	1	up	771145	-	CGNC:536|Ensembl:ENSGALG00000030966	26	-	mitogen-activated protein kinase 13	gga04010(MAPK signaling pathway)//gga04068(FoxO signaling pathway)//gga04261(Adrenergic signaling in cardiomyocytes)//gga04370(VEGF signaling pathway)//gga04620(Toll-like receptor signaling pathway)//gga04621(NOD-like receptor signaling pathway)//gga04622(RIG-I-like receptor signaling pathway)//gga04912(GnRH signaling pathway)//gga04914(Progesterone-mediated oocyte maturation)//gga04933(AGE-RAGE …
FKBP6	ENSGALG00000000837	protein_coding	-	chr19:168793-295292	0.67077	0	inf	inf	1	1	up	417460	-	CGNC:50514|Ensembl:ENSGALG00000029211	19	-	FK506 binding protein 6			GO:0003755(peptidyl-prolyl cis-trans isomerase activity)	GO:0000413(protein peptidyl-prolyl isomerization)
ZDHHC18	ENSGALG00000000869	protein_coding	+	chr23:1766598-1788935	6.94208	2.26545	3.06433	1.61557	0.0782	0.994263	up	419575	-	CGNC:570|Ensembl:ENSGALG00000034910	23	-	zinc finger, DHHC-type containing 18		GO:0016021(integral component of membrane)	GO:0019706(protein-cysteine S-palmitoyltransferase activity)
NDRG4	ENSGALG00000000874	protein_coding	-	chr11:350493-364200	0.372899	0	inf	inf	1	1	up	768618	-	CGNC:574|Ensembl:ENSGALG00000043662	11	-	NDRG family member 4
KDF1	ENSGALG00000000902	protein_coding	-	chr23:1825481-1830175	1.41628	0	inf	inf	1	1	up	769268	C1orf172|C23H1ORF172	CGNC:597|Ensembl:ENSGALG00000000902	23	-	keratinocyte differentiation factor 1		GO:0005654(nucleoplasm)//GO:0030054(cell junction)//GO:0031252(cell leading edge)//GO:0005938(cell cortex)//GO:0072686(mitotic spindle)		GO:0045606(positive regulation of epidermal cell differentiation)//GO:0010482(regulation of epidermal cell division)//GO:0048589(developmental growth)//GO:2000647(negative regulation of stem cell proliferation)//GO:0010839(negative regulation of keratinocyte proliferation)//GO:0061436(establishment of skin barrier)//GO:0003334(keratinocyte development)//GO:0016331(morphogenesis of embryonic epith…
USB1	ENSGALG00000000904	protein_coding	-	chr11:446697-449834	6.27273	1.66449	3.76855	1.91401	0.19695	0.994263	up	415628	C11H16ORF57|C16orf57|HVSL1|Mpn1|PN|hUsb1	CGNC:599|Ensembl:ENSGALG00000035604	11	-	U6 snRNA biogenesis 1		GO:0005634(nucleus)	GO:0004518(nuclease activity)	GO:0006397(mRNA processing)//GO:0034477(U6 snRNA 3'-end processing)//GO:0090305(nucleic acid phosphodiester bond hydrolysis)//GO:0008380(RNA splicing)
KCNAB2	ENSGALG00000000912	protein_coding	-	chr21:671444-684105	0.850257	0	inf	inf	1	1	up	396068	-	CGNC:606|Ensembl:ENSGALG00000037241	21	-	potassium voltage-gated channel subfamily A regulatory beta subunit 2		GO:0016021(integral component of membrane)//GO:0005737(cytoplasm)	GO:0005249(voltage-gated potassium channel activity)	GO:0071805(potassium ion transmembrane transport)
CCL4	ENSGALG00000000951	protein_coding	-	chr19:352189-378001	0.91654	0	inf	inf	1	1	up	395551	MIP-1beta|SCYA4	Ensembl:ENSGALG00000032717	19	-	chemokine (C-C motif) ligand 4	gga04060(Cytokine-cytokine receptor interaction)//gga04620(Toll-like receptor signaling pathway)//gga04623(Cytosolic DNA-sensing pathway)//gga05132(Salmonella infection)	GO:0005576(extracellular region)//GO:0005615(extracellular space)	GO:0048020(CCR chemokine receptor binding)//GO:0008009(chemokine activity)	GO:0048247(lymphocyte chemotaxis)//GO:0071347(cellular response to interleukin-1)//GO:0007186(G-protein coupled receptor signaling pathway)//GO:0002548(monocyte chemotaxis)//GO:0002269(leukocyte activation involved in inflammatory response)//GO:0071356(cellular response to tumor necrosis factor)//GO:0070374(positive regulation of ERK1 and ERK2 cascade)//GO:0043547(positive regulation of GTPase ac…
PUS3	ENSGALG00000000962	protein_coding	-	chr24:309429-315623	11.2709	4.49081	2.50978	1.32756	0.0488	0.994263	up	419708	-	CGNC:638|Ensembl:ENSGALG00000000962	24	-	pseudouridylate synthase 3		GO:0005634(nucleus)//GO:0005737(cytoplasm)	GO:0003723(RNA binding)//GO:0009982(pseudouridine synthase activity)	GO:1990481(mRNA pseudouridine synthesis)//GO:0031119(tRNA pseudouridine synthesis)
IGSF1	ENSGALG00000000974	protein_coding	+	chr20:40714-45256	0.923658	0.301464	3.0639	1.61537	1	1	up
CCDC27	ENSGALG00000000982	protein_coding	-	chr21:934026-942588	0.299354	0.0610744	4.90145	2.29321	1	1	up	101751184	-	CGNC:651|Ensembl:ENSGALG00000043926	21	-	coiled-coil domain containing 27
MTFR1L	ENSGALG00000000998	protein_coding	-	chr23:2227223-2234082	12.3526	6.17561	2.00024	1.00017	0.15425	0.994263	up	419586	FAM54B|HYST1888|MST116|MSTP116	CGNC:665|Ensembl:ENSGALG00000000998	23	-	mitochondrial fission regulator 1 like
-	ENSGALG00000001004	protein_coding	-	chr19:410357-421656	0.657411	0.134108	4.9021	2.2934	1	1	up
ARPC5L	ENSGALG00000001014	protein_coding	-	chr17:9581013-9584307	18.6045	5.3833	3.45597	1.78909	0.0515	0.994263	up	101752218	-	CGNC:71626|Ensembl:ENSGALG00000001014	17	-	actin related protein 2/3 complex subunit 5 like
MAN1C1	ENSGALG00000001038	protein_coding	-	chr23:2257730-2299072	1.09356	0.223044	4.90288	2.29363	1	1	up	419588	-	CGNC:701	23	-	mannosidase, alpha, class 1C, member 1	gga00510(N-Glycan biosynthesis)//gga01100(Metabolic pathways)//gga04141(Protein processing in endoplasmic reticulum)
-	ENSGALG00000001049	protein_coding	+	chr19:705895-708766	8.16434	4.06943	2.00626	1.00451	0.24	0.994263	up
SRA1	ENSGALG00000001113	protein_coding	-	chr13:990191-1095980	17.0272	2.08196	8.17846	3.03183	0.30795	0.994263	up	427608	-	CGNC:62146|Ensembl:ENSGALG00000040453	13	-	steroid receptor RNA activator 1
DOK4	ENSGALG00000001160	protein_coding	+	chr11:555286-557066	1.11171	0	inf	inf	1	1	up	430610	-	CGNC:53999	11	-	docking protein 4
NCF1	ENSGALG00000001189	protein_coding	-	chr19:2637326-2644145	0.5516	0	inf	inf	1	1	up	417485	NCF1C	CGNC:50525|Ensembl:ENSGALG00000001189	19	-	neutrophil cytosolic factor 1	gga04145(Phagosome)	GO:0019898(extrinsic component of membrane)//GO:0043020(NADPH oxidase complex)//GO:0002102(podosome)//GO:0005829(cytosol)	GO:0016175(superoxide-generating NADPH oxidase activity)//GO:0035091(phosphatidylinositol binding)//GO:0043325(phosphatidylinositol-3,4-bisphosphate binding)//GO:0017124(SH3 domain binding)//GO:0016176(superoxide-generating NADPH oxidase activator activity)	GO:0055114(oxidation-reduction process)//GO:0006801(superoxide metabolic process)//GO:0045741(positive regulation of epidermal growth factor-activated receptor activity)//GO:0014068(positive regulation of phosphatidylinositol 3-kinase signaling)//GO:0071276(cellular response to cadmium ion)//GO:0046330(positive regulation of JNK cascade)//GO:0071800(podosome assembly)//GO:0034614(cellular respons…
PLCH2	ENSGALG00000001207	protein_coding	-	chr21:1471394-1504374	0.205121	0	inf	inf	1	1	up	428180	-	CGNC:820	21	-	phospholipase C eta 2	gga00562(Inositol phosphate metabolism)//gga01100(Metabolic pathways)
PARD6A	ENSGALG00000001214	protein_coding	-	chr11:607901-611735	2.75836	0.749926	3.67817	1.87899	1	1	up	101748842	-	CGNC:827|Ensembl:ENSGALG00000001214	11	-	par-6 partitioning defective 6 homolog alpha (C. elegans)	gga04144(Endocytosis)//gga04530(Tight junction)	GO:0005923(bicellular tight junction)//GO:0045177(apical part of cell)//GO:0005938(cell cortex)//GO:0034451(centriolar satellite)//GO:0043234(protein complex)//GO:0005634(nucleus)	GO:0030742(GTP-dependent protein binding)//GO:0005080(protein kinase C binding)//GO:0017048(Rho GTPase binding)	GO:0007098(centrosome cycle)//GO:0001933(negative regulation of protein phosphorylation)//GO:0007163(establishment or maintenance of cell polarity)//GO:0045217(cell-cell junction maintenance)//GO:1904781(positive regulation of protein localization to centrosome)
SHC2	ENSGALG00000001289	protein_coding	-	chr28:2579674-2585370	1.62353	0.602179	2.69609	1.43087	1	1	up	770341	-	CGNC:880|Ensembl:ENSGALG00000001289	28	-	SHC (Src homology 2 domain containing) transforming protein 2	gga04012(ErbB signaling pathway)//gga04370(VEGF signaling pathway)//gga04510(Focal adhesion)//gga04910(Insulin signaling pathway)	GO:0005622(intracellular)	GO:0030971(receptor tyrosine kinase binding)	GO:0000187(activation of MAPK activity)//GO:0035556(intracellular signal transduction)
CPNE2	ENSGALG00000001316	protein_coding	+	chr11:665608-694761	4.67182	1.58785	2.94223	1.55691	0.22085	0.994263	up	415646	-	CGNC:50034|Ensembl:ENSGALG00000001316	11	-	copine 2		GO:0005886(plasma membrane)//GO:0005634(nucleus)//GO:0005737(cytoplasm)//GO:0070062(extracellular exosome)		GO:0071277(cellular response to calcium ion)
CAMK1G	ENSGALG00000001319	protein_coding	+	chr26:3048039-3056197	1.16724	0.476197	2.45117	1.29347	1	1	up	419859	-	CGNC:903|Ensembl:ENSGALG00000001319	26	-	calcium/calmodulin-dependent protein kinase IG		GO:0005622(intracellular)//GO:0005886(plasma membrane)//GO:0012505(endomembrane system)//GO:0005954(calcium- and calmodulin-dependent protein kinase complex)	GO:0005524(ATP binding)//GO:0005516(calmodulin binding)//GO:0004683(calmodulin-dependent protein kinase activity)	GO:0035556(intracellular signal transduction)//GO:0018105(peptidyl-serine phosphorylation)//GO:0018107(peptidyl-threonine phosphorylation)
HCN2	ENSGALG00000001342	protein_coding	+	chr28:2630748-2642551	1.32824	0.406428	3.26807	1.70844	1	1	up	770384	-	CGNC:55989|Ensembl:ENSGALG00000001342	28	-	hyperpolarization activated cyclic nucleotide-gated potassium channel 2		GO:0005887(integral component of plasma membrane)//GO:0098855(HCN channel complex)	GO:0005249(voltage-gated potassium channel activity)//GO:0005248(voltage-gated sodium channel activity)//GO:0042802(identical protein binding)//GO:0005222(intracellular cAMP activated cation channel activity)	GO:0060078(regulation of postsynaptic membrane potential)//GO:0071321(cellular response to cGMP)//GO:0034765(regulation of ion transmembrane transport)//GO:0071320(cellular response to cAMP)//GO:0042391(regulation of membrane potential)//GO:1990573(potassium ion import across plasma membrane)//GO:0098719(sodium ion import across plasma membrane)
HTR4	ENSGALG00000001383	protein_coding	-	chr13:7596137-7665243	0.327026	0	inf	inf	1	1	up	416150	-	CGNC:948	13	-	5-hydroxytryptamine receptor 4	gga04020(Calcium signaling pathway)//gga04080(Neuroactive ligand-receptor interaction)	GO:0005887(integral component of plasma membrane)//GO:0005737(cytoplasm)	GO:0001594(trace-amine receptor activity)//GO:0004993(G-protein coupled serotonin receptor activity)	GO:0098664(G-protein coupled serotonin receptor signaling pathway)//GO:0032098(regulation of appetite)//GO:0007214(gamma-aminobutyric acid signaling pathway)//GO:0007268(chemical synaptic transmission)
PLLP	ENSGALG00000001391	protein_coding	-	chr11:759001-760334	4.97405	0	inf	inf	0.01765	0.994263	up	415650	-	CGNC:954|Ensembl:ENSGALG00000001391	11	-	plasmolipin		GO:0016021(integral component of membrane)//GO:0070062(extracellular exosome)
-	ENSGALG00000001398	protein_coding	-	chr10:2107248-2114518	0.474853	0.221442	2.14436	1.10055	1	1	up
SRSF4	ENSGALG00000001411	protein_coding	-	chr23:2692802-2697835	0.325195	0	inf	inf	1	1	up	419600	SFRS4	CGNC:968	23	-	serine and arginine rich splicing factor 4	gga03040(Spliceosome)//gga05168(Herpes simplex infection)
SEMA7A	ENSGALG00000001412	protein_coding	+	chr10:2032640-2055582	0.801608	0.280346	2.85936	1.51569	1	1	up	415298	-	CGNC:969|Ensembl:ENSGALG00000001412	10	-	semaphorin 7A (John Milton Hagen blood group)		GO:0009897(external side of plasma membrane)//GO:0005615(extracellular space)	GO:0038191(neuropilin binding)//GO:0005178(integrin binding)	GO:0048675(axon extension)//GO:0050727(regulation of inflammatory response)//GO:0001649(osteoblast differentiation)//GO:0021988(olfactory lobe development)//GO:0050919(negative chemotaxis)//GO:0060907(positive regulation of macrophage cytokine production)//GO:0007229(integrin-mediated signaling pathway)//GO:0070374(positive regulation of ERK1 and ERK2 cascade)//GO:0045773(positive regulation of a…
YDJC	ENSGALG00000001424	protein_coding	-	chr15:353465-366947	7.22873	1.68441	4.29155	2.1015	0.14775	0.994263	up	771088	-	CGNC:56498|Ensembl:ENSGALG00000029198	15	-	YdjC homolog (bacterial)			GO:0003824(catalytic activity)	GO:0005975(carbohydrate metabolic process)
STOM	ENSGALG00000001434	protein_coding	-	chr17:8422955-8430634	0.758919	0.309618	2.45115	1.29346	1	1	up	417118	-	CGNC:987|Ensembl:ENSGALG00000001434	17	-	stomatin		GO:0005887(integral component of plasma membrane)//GO:0048471(perinuclear region of cytoplasm)//GO:0005829(cytosol)//GO:0005739(mitochondrion)//GO:0070062(extracellular exosome)//GO:0045121(membrane raft)//GO:0005783(endoplasmic reticulum)//GO:0072562(blood microparticle)//GO:0005856(cytoskeleton)	GO:0070063(RNA polymerase binding)//GO:0042803(protein homodimerization activity)	GO:0090314(positive regulation of protein targeting to membrane)//GO:0044829(positive regulation by host of viral genome replication)//GO:0051260(protein homooligomerization)//GO:1901585(regulation of acid-sensing ion channel activity)
PTPRU	ENSGALG00000001443	protein_coding	+	chr23:2715390-2762791	0.629792	0.128495	4.90132	2.29317	1	1	up	395153	-	CGNC:996|Ensembl:ENSGALG00000031440	23	-	protein tyrosine phosphatase, receptor type U		GO:0016021(integral component of membrane)//GO:0030054(cell junction)//GO:0005886(plasma membrane)	GO:0004725(protein tyrosine phosphatase activity)	GO:0007155(cell adhesion)//GO:0035335(peptidyl-tyrosine dephosphorylation)//GO:0030154(cell differentiation)
FABP6	ENSGALG00000001445	protein_coding	-	chr13:7192750-7251075	2.8503	1.16059	2.4559	1.29625	1	1	up	416154	gastrotropin	CGNC:998|Ensembl:ENSGALG00000001445	13	-	fatty acid binding protein 6	gga03320(PPAR signaling pathway)	GO:0005737(cytoplasm)	GO:0032052(bile acid binding)//GO:0005215(transporter activity)	GO:0006810(transport)//GO:0008206(bile acid metabolic process)
RAB40B	ENSGALG00000001545	protein_coding	+	chr18:3340421-3363541	1.15243	0	inf	inf	1	1	up	417338	-	CGNC:50490|Ensembl:ENSGALG00000001545	18	-	RAB40B, member RAS oncogene family		GO:0005768(endosome)//GO:0005886(plasma membrane)//GO:0030667(secretory granule membrane)//GO:0008021(synaptic vesicle)	GO:0003924(GTPase activity)//GO:0005525(GTP binding)	GO:0017157(regulation of exocytosis)//GO:0016567(protein ubiquitination)//GO:0009306(protein secretion)//GO:0006904(vesicle docking involved in exocytosis)//GO:0072659(protein localization to plasma membrane)//GO:0035556(intracellular signal transduction)
-	ENSGALG00000001550	protein_coding	+	chr20:1049214-1396209	5.12323	0.501622	10.2133	3.35238	0.15215	0.994263	up
ROMO1	ENSGALG00000001556	protein_coding	-	chr20:1031412-1032864	3.01953	0	inf	inf	1	1	up	768833	C20orf52	CGNC:1076|Ensembl:ENSGALG00000027416	20	-	reactive oxygen species modulator 1		GO:0016021(integral component of membrane)//GO:0005739(mitochondrion)		GO:0008284(positive regulation of cell proliferation)//GO:0050829(defense response to Gram-negative bacterium)//GO:0001302(replicative cell aging)//GO:0050830(defense response to Gram-positive bacterium)//GO:0034614(cellular response to reactive oxygen species)//GO:2000379(positive regulation of reactive oxygen species metabolic process)//GO:0051715(cytolysis in other organism)//GO:0061844(antimi…
NEIL1	ENSGALG00000001586	protein_coding	+	chr10:2137428-2141381	1.08295	0.29447	3.67764	1.87878	1	1	up	770068	-	CGNC:1099|Ensembl:ENSGALG00000001586	10	-	nei like DNA glycosylase 1	gga03410(Base excision repair)	GO:0005654(nucleoplasm)//GO:0005737(cytoplasm)	GO:0003906(DNA-(apurinic or apyrimidinic site) lyase activity)//GO:0019104(DNA N-glycosylase activity)//GO:0008270(zinc ion binding)//GO:0003684(damaged DNA binding)//GO:0008022(protein C-terminus binding)	GO:0006289(nucleotide-excision repair)//GO:0006284(base-excision repair)//GO:0032074(negative regulation of nuclease activity)//GO:0006979(response to oxidative stress)
C17orf62	ENSGALG00000001607	protein_coding	+	chr18:3472434-3480495	4.53822	2.11555	2.14518	1.1011	0.29325	0.994263	up
-	ENSGALG00000001620	protein_coding	+	chr17:8281400-8286435	0.480359	0	inf	inf	1	1	up
MANEAL	ENSGALG00000001653	protein_coding	-	chr23:3521014-3527784	0.680877	0.277717	2.4517	1.29378	1	1	up	419611	-	CGNC:1155	23	-	mannosidase endo-alpha like
RPAIN	ENSGALG00000001666	protein_coding	-	chr19:3434143-3436600	5.89704	2.40442	2.45258	1.2943	0.2939	0.994263	up	417500	-	CGNC:1165	19	-	RPA interacting protein
SCAMP2	ENSGALG00000001689	protein_coding	+	chr10:1905023-1911188	27.4084	13.3154	2.0584	1.04152	0.0335	0.994263	up	769853	-	CGNC:1178|Ensembl:ENSGALG00000001689	10	-	secretory carrier membrane protein 2		GO:0032588(trans-Golgi network membrane)//GO:0016021(integral component of membrane)//GO:0070062(extracellular exosome)//GO:0055038(recycling endosome membrane)		GO:0015031(protein transport)
PUSL1	ENSGALG00000001714	protein_coding	-	chr21:2357084-2379493	8.96721	3.65638	2.45248	1.29424	0.1947	0.994263	up	419419	-	CGNC:1199|Ensembl:ENSGALG00000001701|Ensembl:ENSGALG00000001714	21	-	pseudouridylate synthase-like 1		GO:0043231(intracellular membrane-bounded organelle)//GO:0016021(integral component of membrane)	GO:0003723(RNA binding)//GO:0009982(pseudouridine synthase activity)//GO:0004930(G-protein coupled receptor activity)	GO:0007186(G-protein coupled receptor signaling pathway)//GO:0031119(tRNA pseudouridine synthesis)
LHX4	ENSGALG00000001735	protein_coding	-	chr8:5958428-5966580	0.3843	0	inf	inf	1	1	up	776024	-	CGNC:1220|Ensembl:ENSGALG00000036587	8	-	LIM homeobox 4		GO:0005634(nucleus)	GO:0043565(sequence-specific DNA binding)//GO:0046872(metal ion binding)	GO:0006355(regulation of transcription, DNA-templated)
HCN4	ENSGALG00000001764	protein_coding	-	chr10:1527276-1624455	0.191233	0	inf	inf	1	1	up	427478	-	CGNC:53100|Ensembl:ENSGALG00000001764	10	-	hyperpolarization activated cyclic nucleotide gated potassium channel 4		GO:0005887(integral component of plasma membrane)//GO:0098855(HCN channel complex)//GO:0048471(perinuclear region of cytoplasm)	GO:0005248(voltage-gated sodium channel activity)//GO:0042802(identical protein binding)//GO:0030552(cAMP binding)//GO:0005249(voltage-gated potassium channel activity)//GO:0005222(intracellular cAMP activated cation channel activity)//GO:0086041(voltage-gated potassium channel activity involved in SA node cell action potential depolarization)	GO:0060078(regulation of postsynaptic membrane potential)//GO:0071321(cellular response to cGMP)//GO:0034765(regulation of ion transmembrane transport)//GO:0071320(cellular response to cAMP)//GO:0042391(regulation of membrane potential)//GO:0098719(sodium ion import across plasma membrane)//GO:0086046(membrane depolarization during SA node cell action potential)//GO:0086091(regulation of heart ra…
PROC	ENSGALG00000001780	protein_coding	+	chr9:788896-797608	1.46211	0	inf	inf	1	1	up	395085	-	CGNC:1251|Ensembl:ENSGALG00000001780	9	-	protein C, inactivator of coagulation factors Va and VIIIa		GO:0005783(endoplasmic reticulum)//GO:0005794(Golgi apparatus)//GO:0005615(extracellular space)	GO:0004252(serine-type endopeptidase activity)//GO:0005509(calcium ion binding)	GO:0007596(blood coagulation)//GO:0044537(regulation of circulating fibrinogen levels)//GO:0001889(liver development)//GO:1903142(positive regulation of establishment of endothelial barrier)//GO:0050728(negative regulation of inflammatory response)//GO:0043066(negative regulation of apoptotic process)//GO:0030195(negative regulation of blood coagulation)//GO:0006508(proteolysis)
GDF5	ENSGALG00000001786	protein_coding	+	chr20:1438851-1442860	0.177322	0	inf	inf	1	1	up	374249	-	CGNC:1254|Ensembl:ENSGALG00000038355	20	-	growth differentiation factor 5	gga04350(TGF-beta signaling pathway)	GO:0005576(extracellular region)	GO:0008083(growth factor activity)
Myl2	ENSGALG00000001793	protein_coding	-	chr19:3752430-3773359	2.08387	0.849749	2.45234	1.29416	1	1	up	416874	G2|MLC-2A|MLC2	CGNC:50364|Ensembl:ENSGALG00000004582	15	-	myosin, light chain 2, regulatory, cardiac, slow	gga04260(Cardiac muscle contraction)//gga04261(Adrenergic signaling in cardiomyocytes)//gga04510(Focal adhesion)//gga04530(Tight junction)//gga04810(Regulation of actin cytoskeleton)	GO:0097512(cardiac myofibril)//GO:0015629(actin cytoskeleton)	GO:0003785(actin monomer binding)//GO:0005509(calcium ion binding)	GO:0060048(cardiac muscle contraction)//GO:0048747(muscle fiber development)//GO:0009791(post-embryonic development)//GO:0055003(cardiac myofibril assembly)//GO:0055010(ventricular cardiac muscle tissue morphogenesis)//GO:0042694(muscle cell fate specification)//GO:0098735(positive regulation of the force of heart contraction)//GO:0030308(negative regulation of cell growth)
BBS4	ENSGALG00000001798	protein_coding	+	chr10:1200432-1219254	4.48007	1.27936	3.50181	1.8081	0.0961	0.994263	up	415318	-	CGNC:1264|Ensembl:ENSGALG00000001798	10	-	Bardet-Biedl syndrome 4		GO:0031514(motile cilium)//GO:0001917(photoreceptor inner segment)//GO:0034451(centriolar satellite)//GO:0036064(ciliary basal body)//GO:0034464(BBSome)//GO:0001750(photoreceptor outer segment)//GO:0005829(cytosol)//GO:0005814(centriole)//GO:0060170(ciliary membrane)//GO:0032391(photoreceptor connecting cilium)//GO:0005634(nucleus)//GO:0000242(pericentriolar material)	GO:0043014(alpha-tubulin binding)//GO:0034452(dynactin binding)//GO:0048487(beta-tubulin binding)//GO:0003777(microtubule motor activity)//GO:0001103(RNA polymerase II repressing transcription factor binding)	GO:0007286(spermatid development)//GO:0021987(cerebral cortex development)//GO:0048854(brain morphogenesis)//GO:0034454(microtubule anchoring at centrosome)//GO:1905515(non-motile cilium assembly)//GO:0021756(striatum development)//GO:0046548(retinal rod cell development)//GO:0001843(neural tube closure)//GO:1903546(protein localization to photoreceptor outer segment)//GO:0045444(fat cell differe…
-	ENSGALG00000001824	protein_coding	+	chr11:1155406-1157865	2.03015	0.662387	3.0649	1.61584	1	1	up
ALKBH4	ENSGALG00000001844	protein_coding	-	chr19:4152160-4154414	2.46075	0.334531	7.35584	2.87889	1	1	up	417510	-	CGNC:1299	19	-	alkB homolog 4, lysine demethylase		GO:0030496(midbody)//GO:0070938(contractile ring)	GO:0016706(oxidoreductase activity, acting on paired donors, with incorporation or reduction of molecular oxygen, 2-oxoglutarate as one donor, and incorporation of one atom each of oxygen into both donors)//GO:0003779(actin binding)	GO:0055114(oxidation-reduction process)//GO:0006482(protein demethylation)//GO:0036090(cleavage furrow ingression)//GO:0031032(actomyosin structure organization)
B3GALT6	ENSGALG00000001859	protein_coding	-	chr21:2531048-2532083	7.2139	2.35345	3.06524	1.616	0.1636	0.994263	up	428185	-	CGNC:1312|Ensembl:ENSGALG00000001859	21	-	beta-1,3-galactosyltransferase 6	gga00532(Glycosaminoglycan biosynthesis - chondroitin sulfate / dermatan sulfate)//gga00534(Glycosaminoglycan biosynthesis - heparan sulfate / heparin)//gga01100(Metabolic pathways)	GO:0016021(integral component of membrane)//GO:0000139(Golgi membrane)	GO:0008378(galactosyltransferase activity)	GO:0006486(protein glycosylation)
TNFRSF18	ENSGALG00000001882	protein_coding	+	chr21:2560350-2566659	0.14178	0	inf	inf	1	1	up	419424	-	CGNC:1331|Ensembl:ENSGALG00000001882	21	-	TNF receptor superfamily member 18	gga04060(Cytokine-cytokine receptor interaction)	GO:0005887(integral component of plasma membrane)	GO:0005031(tumor necrosis factor-activated receptor activity)	GO:0007275(multicellular organism development)//GO:0042127(regulation of cell proliferation)//GO:0097190(apoptotic signaling pathway)//GO:0006954(inflammatory response)//GO:0032496(response to lipopolysaccharide)//GO:0043066(negative regulation of apoptotic process)//GO:0006955(immune response)//GO:0033209(tumor necrosis factor-mediated signaling pathway)//GO:0042981(regulation of apoptotic proce…
-	ENSGALG00000001919	protein_coding	-	chr20:1601527-1862123	2.72449	0.740723	3.67815	1.87898	1	1	up
RFT1	ENSGALG00000001945	protein_coding	-	chr12:1197484-1208638	11.1443	5.56994	2.00079	1.00057	0.0475	0.994263	up	770487	-	CGNC:1374|Ensembl:ENSGALG00000001945	12	-	RFT1 homolog		GO:0016021(integral component of membrane)//GO:0005789(endoplasmic reticulum membrane)	GO:0005319(lipid transporter activity)	GO:0034203(glycolipid translocation)
FNDC7	ENSGALG00000001983	protein_coding	-	chr8:1252808-1263823	0.883145	0	inf	inf	1	1	up	424339	-	CGNC:1407|Ensembl:ENSGALG00000001983	8	-	fibronectin type III domain containing 7
DNALI1	ENSGALG00000001996	protein_coding	-	chr23:3699919-3703222	1.3912	0	inf	inf	1	1	up	419615	-	CGNC:1415|Ensembl:ENSGALG00000001996	23	-	dynein axonemal light intermediate chain 1		GO:0005930(axoneme)//GO:0005737(cytoplasm)//GO:0030175(filopodium)	GO:0045504(dynein heavy chain binding)
GRAMD2	ENSGALG00000002000	protein_coding	-	chr10:1071515-1106648	1.7922	0.877184	2.04313	1.03078	1	1	up	101748322	-	CGNC:67809	10	-	GRAM domain containing 2
C15H22ORF25	ENSGALG00000002056	protein_coding	+	chr15:1254452-1271124	10.0401	4.2134	2.3829	1.25272	0.02535	0.994263	up
FAM214B	ENSGALG00000002069	protein_coding	-	chrZ:8457023-8462408	0.715842	0	inf	inf	1	1	up	100858763	-	CGNC:64338|Ensembl:ENSGALG00000002069	Z	-	family with sequence similarity 214 member B
GALR2	ENSGALG00000002088	protein_coding	-	chr18:4508341-4510379	0.43467	0	inf	inf	1	1	up	770030	-	CGNC:1484|Ensembl:ENSGALG00000002088	18	-	galanin receptor 2	gga04080(Neuroactive ligand-receptor interaction)	GO:0005887(integral component of plasma membrane)	GO:0017046(peptide hormone binding)//GO:0004966(galanin receptor activity)	GO:0031175(neuron projection development)//GO:0007200(phospholipase C-activating G-protein coupled receptor signaling pathway)//GO:0007218(neuropeptide signaling pathway)//GO:0045944(positive regulation of transcription from RNA polymerase II promoter)//GO:1902608(positive regulation of large conductance calcium-activated potassium channel activity)//GO:0007188(adenylate cyclase-modulating G-prot…
ZMYND10	ENSGALG00000002114	protein_coding	-	chr12:1422397-1431483	0.326594	0.133246	2.45105	1.2934	1	1	up	770538	TUSC4	CGNC:1521	12	-	zinc finger MYND-type containing 10
OSCP1	ENSGALG00000002123	protein_coding	+	chr23:3977705-3987124	0.80008	0	inf	inf	1	1	up	428220	C1orf102	CGNC:1514|Ensembl:ENSGALG00000002123	23	-	organic solute carrier partner 1		GO:0005575(cellular_component)	GO:0003674(molecular_function)	GO:1903955(positive regulation of protein targeting to mitochondrion)//GO:0008150(biological_process)
-	ENSGALG00000002128	protein_coding	+	chr14:13303875-13320808	1.19918	0.0978561	12.2545	3.61524	1	1	up
STK40	ENSGALG00000002130	protein_coding	+	chr23:3988932-4004007	9.60925	3.54674	2.70932	1.43793	0.048	0.994263	up	395120	-	CGNC:1520|Ensembl:ENSGALG00000032925	23	-	serine/threonine kinase 40		GO:0005634(nucleus)//GO:0005737(cytoplasm)	GO:0004672(protein kinase activity)//GO:0005524(ATP binding)//GO:0004674(protein serine/threonine kinase activity)	GO:0006468(protein phosphorylation)
PRR16	ENSGALG00000002183	protein_coding	-	chrZ:71020001-71124757	1.13498	0.462783	2.45251	1.29426	1	1	up	769337	-	CGNC:1556|Ensembl:ENSGALG00000002183	Z	-	proline rich 16				GO:0045727(positive regulation of translation)//GO:0045793(positive regulation of cell size)
C1orf53	ENSGALG00000002224	protein_coding	-	chr8:2287490-2289818	7.05233	3.446	2.04653	1.03318	0.5103	0.994263	up	100859900	C8H1ORF53	CGNC:63259	8	-	chromosome 1 open reading frame 53
C3orf18	ENSGALG00000002240	protein_coding	-	chr12:1732050-1738332	0.867698	0	inf	inf	1	1	up
-	ENSGALG00000002247	protein_coding	+	chr11:1398992-1402340	2.06685	0.843026	2.4517	1.29378	1	1	up
LYRM1	ENSGALG00000002273	protein_coding	+	chr14:14972895-14976954	11.6552	3.4537	3.3747	1.75476	0.2181	0.994263	up	427003	-	CGNC:1620|Ensembl:ENSGALG00000002273	14	-	LYR motif containing 1		GO:0005654(nucleoplasm)//GO:0030496(midbody)//GO:0005739(mitochondrion)
SPSB3	ENSGALG00000002285	protein_coding	+	chr14:13206742-13214081	11.081	4.41992	2.50707	1.326	0.04885	0.994263	up	416401	-	CGNC:1629|Ensembl:ENSGALG00000002285	14	-	splA/ryanodine receptor domain and SOCS box containing 3		GO:0005622(intracellular)		GO:0035556(intracellular signal transduction)
GALK1	ENSGALG00000002311	protein_coding	+	chr18:4690305-4716218	2.74652	1.01222	2.71336	1.44008	1	1	up	417373	-	CGNC:1647|Ensembl:ENSGALG00000002311	18	-	galactokinase 1	gga00052(Galactose metabolism)//gga00520(Amino sugar and nucleotide sugar metabolism)//gga01100(Metabolic pathways)
IGFALS	ENSGALG00000002325	protein_coding	+	chr14:13198608-13200438	0.247896	0	inf	inf	1	1	up	427649	-	CGNC:1657	14	-	insulin like growth factor binding protein acid labile subunit
GPC1	ENSGALG00000002342	protein_coding	-	chr9:2207168-2371382	0.225178	0	inf	inf	1	1	up	424770	glypican-1	CGNC:52254|Ensembl:ENSGALG00000040316	9	-	glypican 1		GO:0005768(endosome)//GO:0005886(plasma membrane)//GO:0070062(extracellular exosome)//GO:0031225(anchored component of membrane)//GO:0005829(cytosol)//GO:0045121(membrane raft)//GO:0005578(proteinaceous extracellular matrix)//GO:0005654(nucleoplasm)//GO:0005615(extracellular space)	GO:0005507(copper ion binding)//GO:0043236(laminin binding)//GO:0043395(heparan sulfate proteoglycan binding)//GO:0017134(fibroblast growth factor binding)	GO:1902726(positive regulation of skeletal muscle satellite cell differentiation)//GO:0040037(negative regulation of fibroblast growth factor receptor signaling pathway)//GO:1902724(positive regulation of skeletal muscle satellite cell proliferation)//GO:1902725(negative regulation of satellite cell differentiation)//GO:1902723(negative regulation of skeletal muscle satellite cell proliferation)/…
C3orf58	ENSGALG00000002347	protein_coding	+	chr9:10395858-10407198	6.65121	2.71279	2.4518	1.29384	0.18775	0.994263	up
SLC9A9	ENSGALG00000002374	protein_coding	-	chr9:10197230-10365969	0.347955	0.0946475	3.67631	1.87826	1	1	up	424772	-	CGNC:52255|Ensembl:ENSGALG00000002374	9	-	solute carrier family 9 member A9		GO:0005886(plasma membrane)//GO:0016021(integral component of membrane)//GO:0055037(recycling endosome)	GO:0015385(sodium:proton antiporter activity)//GO:0015386(potassium:proton antiporter activity)	GO:0051453(regulation of intracellular pH)//GO:1902600(hydrogen ion transmembrane transport)//GO:0098719(sodium ion import across plasma membrane)//GO:0071805(potassium ion transmembrane transport)
MPP3	ENSGALG00000002392	protein_coding	+	chr27:3252520-3267354	4.10874	1.78814	2.29778	1.20024	0.11075	0.994263	up	419985	-	CGNC:1706|Ensembl:ENSGALG00000042521	27	-	membrane palmitoylated protein 3
RGP1	ENSGALG00000002394	protein_coding	-	chrZ:8975201-8984687	4.70826	2.11278	2.22846	1.15605	0.18575	0.994263	up	431658	-	CGNC:1708|Ensembl:ENSGALG00000002394	Z	-	RGP1 homolog, RAB6A GEF complex partner 1
FAM69B	ENSGALG00000002437	protein_coding	-	chr17:7727748-7732529	0.9826	0.20042	4.90268	2.29357	1	1	up	417139	-	CGNC:1739|Ensembl:ENSGALG00000002437	17	-	family with sequence similarity 69 member B		GO:0016021(integral component of membrane)
SLC25A33	ENSGALG00000002519	protein_coding	+	chr21:3398304-3417478	5.72969	2.57095	2.22863	1.15616	0.18575	0.994263	up	419442	-	CGNC:1806|Ensembl:ENSGALG00000002519	21	-	solute carrier family 25 member 33		GO:0005743(mitochondrial inner membrane)//GO:0016021(integral component of membrane)	GO:0015218(pyrimidine nucleotide transmembrane transporter activity)	GO:1990314(cellular response to insulin-like growth factor stimulus)//GO:0008284(positive regulation of cell proliferation)//GO:0006390(transcription from mitochondrial promoter)//GO:0030307(positive regulation of cell growth)//GO:1990519(mitochondrial pyrimidine nucleotide import)//GO:0034551(mitochondrial respiratory chain complex III assembly)//GO:0031930(mitochondria-nucleus signaling pathway…
ADGRD1	ENSGALG00000002557	protein_coding	-	chr15:2912109-3202073	0.320925	0	inf	inf	1	1	up	416803	GPR133	CGNC:1839|Ensembl:ENSGALG00000002557	15	-	adhesion G protein-coupled receptor D1		GO:0005886(plasma membrane)//GO:0016021(integral component of membrane)	GO:0004930(G-protein coupled receptor activity)	GO:0010579(positive regulation of adenylate cyclase activity involved in G-protein coupled receptor signaling pathway)//GO:0007166(cell surface receptor signaling pathway)
-	ENSGALG00000002574	protein_coding	+	chr10:78702-92504	1.57298	0	inf	inf	1	1	up
RIMBP2	ENSGALG00000002579	protein_coding	+	chr15:3219107-3322455	0.677761	0.316052	2.14445	1.10061	1	1	up	374105	RBP2	CGNC:1856|Ensembl:ENSGALG00000002579	15	-	RIMS binding protein 2		GO:0045202(synapse)//GO:0005886(plasma membrane)//GO:0030054(cell junction)		GO:0010923(negative regulation of phosphatase activity)
PIK3CD	ENSGALG00000002583	protein_coding	+	chr21:3470172-3492933	1.49355	0.406294	3.67603	1.87815	1	1	up	419444	-	CGNC:1859|Ensembl:ENSGALG00000002583	21	-	phosphatidylinositol-4,5-bisphosphate 3-kinase catalytic subunit delta	gga00562(Inositol phosphate metabolism)//gga04012(ErbB signaling pathway)//gga04068(FoxO signaling pathway)//gga04070(Phosphatidylinositol signaling system)//gga04150(mTOR signaling pathway)//gga04210(Apoptosis)//gga04261(Adrenergic signaling in cardiomyocytes)//gga04370(VEGF signaling pathway)//gga04510(Focal adhesion)//gga04620(Toll-like receptor signaling pathway)//gga04630(Jak-STAT signaling …	GO:0005942(phosphatidylinositol 3-kinase complex)//GO:0005886(plasma membrane)//GO:0005737(cytoplasm)	GO:0016303(1-phosphatidylinositol-3-kinase activity)//GO:0035005(1-phosphatidylinositol-4-phosphate 3-kinase activity)//GO:0046934(phosphatidylinositol-4,5-bisphosphate 3-kinase activity)	GO:0030168(platelet activation)//GO:0045087(innate immune response)//GO:0014065(phosphatidylinositol 3-kinase signaling)//GO:0006468(protein phosphorylation)//GO:0033031(positive regulation of neutrophil apoptotic process)//GO:0036092(phosphatidylinositol-3-phosphate biosynthetic process)//GO:0006954(inflammatory response)//GO:0046854(phosphatidylinositol phosphorylation)//GO:0010628(positive reg…
DEF6	ENSGALG00000002615	protein_coding	-	chr26:4050272-4061671	1.39606	0.427174	3.26812	1.70846	1	1	up	419893	-	CGNC:1882|Ensembl:ENSGALG00000002615	26	-	DEF6, guanine nucleotide exchange factor		GO:0005654(nucleoplasm)//GO:0016020(membrane)//GO:0005829(cytosol)
-	ENSGALG00000002692	protein_coding	+	chr26:4119240-4126835	1.96058	0.533134	3.67746	1.87871	1	1	up
TAF11	ENSGALG00000002735	protein_coding	+	chr26:4214175-4217459	9.11832	3.54161	2.57462	1.36436	0.12985	0.994263	up	419899	-	CGNC:51121|Ensembl:ENSGALG00000002735	26	-	TATA-box binding protein associated factor 11	gga03022(Basal transcription factors)	GO:0005669(transcription factor TFIID complex)	GO:0046982(protein heterodimerization activity)//GO:0008134(transcription factor binding)//GO:0003677(DNA binding)//GO:0003713(transcription coactivator activity)	GO:1903506(regulation of nucleic acid-templated transcription)//GO:0051123(RNA polymerase II transcriptional preinitiation complex assembly)
MPP2	ENSGALG00000002740	protein_coding	-	chr27:5192608-5198967	0.58727	0	inf	inf	1	1	up	420006	-	CGNC:51148|Ensembl:ENSGALG00000035580	27	-	membrane palmitoylated protein 2
RPS10	ENSGALG00000002813	protein_coding	+	chr26:4318555-4324043	760.742	376.419	2.021	1.01507	0.01415	0.994263	up	419904	RPS10-NUDT3	CGNC:51122|Ensembl:ENSGALG00000002813	26	-	ribosomal protein S10	gga03010(Ribosome)	GO:0022627(cytosolic small ribosomal subunit)	GO:0003723(RNA binding)//GO:0003735(structural constituent of ribosome)	GO:0000028(ribosomal small subunit assembly)
UNC80	ENSGALG00000002828	protein_coding	+	chr7:2531063-2651198	0.161452	0.0329411	4.90122	2.29314	1	1	up	424003	C2ORF21	CGNC:56101	7	-	unc-80 homolog, NALCN activator
REG4	ENSGALG00000002931	protein_coding	+	chr8:4227242-4228652	2.85902	0.77672	3.68088	1.88005	1	1	up	424379	-	CGNC:2119|Ensembl:ENSGALG00000002931	8	-	regenerating family member 4		GO:0005737(cytoplasm)	GO:2001065(mannan binding)//GO:0008201(heparin binding)
CPPED1	ENSGALG00000002940	protein_coding	-	chr14:262294-301024	1.40893	0.287333	4.90346	2.2938	1	1	up	416418	-	CGNC:50250|Ensembl:ENSGALG00000040854	14	-	calcineurin like phosphoesterase domain containing 1			GO:0016787(hydrolase activity)
NRG4	ENSGALG00000002952	protein_coding	+	chr10:2858653-2989154	1.55169	0.632981	2.45139	1.2936	1	1	up	415354	-	CGNC:2132|Ensembl:ENSGALG00000002952	10	-	neuregulin 4	gga04012(ErbB signaling pathway)	GO:0005622(intracellular)//GO:0016021(integral component of membrane)//GO:0005615(extracellular space)	GO:0005102(receptor binding)	GO:0048513(animal organ development)//GO:0035556(intracellular signal transduction)
HMGCS2	ENSGALG00000002960	protein_coding	+	chr8:4229377-4233158	1.35511	0.663337	2.04286	1.03059	1	1	up	424380	-	CGNC:2139|Ensembl:ENSGALG00000002960	8	-	3-hydroxy-3-methylglutaryl-CoA synthase 2	gga00072(Synthesis and degradation of ketone bodies)//gga00280(Valine, leucine and isoleucine degradation)//gga00650(Butanoate metabolism)//gga00900(Terpenoid backbone biosynthesis)//gga01100(Metabolic pathways)	GO:0005743(mitochondrial inner membrane)	GO:0004421(hydroxymethylglutaryl-CoA synthase activity)	GO:0008299(isoprenoid biosynthetic process)//GO:0016126(sterol biosynthetic process)
-	ENSGALG00000002961	protein_coding	+	chr6:7538040-7543968	2.85566	0.582067	4.90608	2.29457	1	1	up
WNK4	ENSGALG00000002986	protein_coding	+	chr27:5039149-5051893	0.80486	0.238848	3.36975	1.75264	1	1	up	777580	-	CGNC:59067|Ensembl:ENSGALG00000032191	27	-	WNK lysine deficient protein kinase 4
SERPINF2	ENSGALG00000002987	protein_coding	+	chr19:5394484-5400909	0.847914	0	inf	inf	1	1	up	100857105	alpha-2-antiplasmin	CGNC:65890|Ensembl:ENSGALG00000002987	19	-	serpin family F member 2
-	ENSGALG00000003025	protein_coding	-	chr9:8992990-9010770	0.50253	0.205	2.45137	1.29359	1	1	up
ADAMTS13	ENSGALG00000003028	protein_coding	+	chr17:6906388-6925818	0.159635	0	inf	inf	1	1	up	417152	-	CGNC:16490|Ensembl:ENSGALG00000033597	17	-	ADAM metallopeptidase with thrombospondin type 1 motif 13
-	ENSGALG00000003058	protein_coding	+	chr28:3448566-3457702	0.237802	0	inf	inf	1	1	up
MRPL44	ENSGALG00000003067	protein_coding	+	chr9:8938637-8941635	30.809	14.4583	2.1309	1.09146	0.03835	0.994263	up	424795	-	CGNC:2221|Ensembl:ENSGALG00000003067	9	-	mitochondrial ribosomal protein L44		GO:0005886(plasma membrane)//GO:0005634(nucleus)//GO:0005762(mitochondrial large ribosomal subunit)	GO:0004525(ribonuclease III activity)//GO:0003725(double-stranded RNA binding)	GO:0090502(RNA phosphodiester bond hydrolysis, endonucleolytic)//GO:0070125(mitochondrial translational elongation)//GO:0006396(RNA processing)
COL4A3	ENSGALG00000003115	protein_coding	+	chr9:8873715-8915386	0.178414	0	inf	inf	1	1	up	424797	-	CGNC:52259|Ensembl:ENSGALG00000038612	9	-	collagen type IV alpha 3 chain	gga04510(Focal adhesion)//gga04512(ECM-receptor interaction)//gga04933(AGE-RAGE signaling pathway in diabetic complications)	GO:0005604(basement membrane)//GO:0005581(collagen trimer)	GO:0005201(extracellular matrix structural constituent)
-	ENSGALG00000003124	protein_coding	-	chr22:2212897-2216123	1.49023	0	inf	inf	1	1	up
LGALS2	ENSGALG00000003213	protein_coding	+	chr1:51050592-51062352	2.20363	0.598867	3.67965	1.87957	1	1	up	425107	-	CGNC:2336|Ensembl:ENSGALG00000003213	1	-	galectin 2			GO:0030246(carbohydrate binding)
HSF4	ENSGALG00000003224	protein_coding	+	chr11:2451761-2466446	0.302688	0	inf	inf	1	1	up	427540	Hsf4b|cHSF4b	CGNC:2342|Ensembl:ENSGALG00000003224	11	-	heat shock transcription factor 4		GO:0016607(nuclear speck)	GO:0043565(sequence-specific DNA binding)//GO:0003700(transcription factor activity, sequence-specific DNA binding)	GO:0008284(positive regulation of cell proliferation)//GO:0048468(cell development)//GO:0033169(histone H3-K9 demethylation)//GO:0045597(positive regulation of cell differentiation)//GO:0007601(visual perception)//GO:0000122(negative regulation of transcription from RNA polymerase II promoter)//GO:0070207(protein homotrimerization)//GO:0043010(camera-type eye development)//GO:0045944(positive reg…
CCDC28B	ENSGALG00000003241	protein_coding	-	chr23:5116498-5118324	1.00711	0	inf	inf	1	1	up	419647	-	CGNC:2353|Ensembl:ENSGALG00000003241	23	-	coiled-coil domain containing 28B		GO:0005813(centrosome)		GO:0060271(cilium assembly)
STAR	ENSGALG00000003242	protein_coding	-	chr22:2256514-2266815	0.521205	0	inf	inf	1	1	up	395421	-	CGNC:2354|Ensembl:ENSGALG00000003242	22	-	steroidogenic acute regulatory protein		GO:0005739(mitochondrion)	GO:0015485(cholesterol binding)//GO:0017127(cholesterol transporter activity)	GO:0044255(cellular lipid metabolic process)//GO:0030301(cholesterol transport)//GO:0008203(cholesterol metabolic process)//GO:0006694(steroid biosynthetic process)//GO:0070859(positive regulation of bile acid biosynthetic process)//GO:0008211(glucocorticoid metabolic process)
COMP	ENSGALG00000003283	protein_coding	+	chr28:3556436-3571233	4.07364	1.58278	2.57371	1.36385	0.12985	0.994263	up	420120	-	CGNC:2383|Ensembl:ENSGALG00000003283	28	-	cartilage oligomeric matrix protein	gga04145(Phagosome)//gga04510(Focal adhesion)//gga04512(ECM-receptor interaction)	GO:0031012(extracellular matrix)//GO:0070062(extracellular exosome)	GO:0005518(collagen binding)//GO:0008201(heparin binding)//GO:0002020(protease binding)//GO:0043395(heparan sulfate proteoglycan binding)//GO:0005509(calcium ion binding)	GO:0060173(limb development)//GO:0003417(growth plate cartilage development)//GO:0007155(cell adhesion)//GO:0043066(negative regulation of apoptotic process)
FMO3	ENSGALG00000003316	protein_coding	-	chr8:4792392-4800086	1.20973	0.227369	5.32053	2.41157	1	1	up	395267	FMO6	CGNC:49237|Ensembl:ENSGALG00000040573	8	-	flavin containing monooxygenase 3	gga00982(Drug metabolism - cytochrome P450)	GO:0016021(integral component of membrane)	GO:0004497(monooxygenase activity)//GO:0050661(NADP binding)//GO:0050660(flavin adenine dinucleotide binding)//GO:0004499(N,N-dimethylaniline monooxygenase activity)	GO:0055114(oxidation-reduction process)
DAPK2	ENSGALG00000003336	protein_coding	+	chr10:3366147-3406151	1.52708	0.74748	2.04297	1.03067	1	1	up	100857587	-	CGNC:66069|Ensembl:ENSGALG00000003336	10	-	death associated protein kinase 2		GO:0005794(Golgi apparatus)//GO:0005737(cytoplasm)	GO:0005524(ATP binding)//GO:0005516(calmodulin binding)//GO:0004674(protein serine/threonine kinase activity)//GO:0042802(identical protein binding)	GO:2000424(positive regulation of eosinophil chemotaxis)//GO:0090023(positive regulation of neutrophil chemotaxis)//GO:2001242(regulation of intrinsic apoptotic signaling pathway)//GO:1990266(neutrophil migration)//GO:0043276(anoikis)//GO:0018107(peptidyl-threonine phosphorylation)//GO:0035556(intracellular signal transduction)//GO:0018105(peptidyl-serine phosphorylation)//GO:0042981(regulation o…
-	ENSGALG00000003348	protein_coding	-	chr13:9736141-9736742	12.2045	0	inf	inf	0.00175	0.646654	up
SIMC1	ENSGALG00000003377	protein_coding	-	chr13:9752005-9757146	7.78743	2.79531	2.78589	1.47814	0.09695	0.994263	up	416231	C13H5orf25|C5ORF25|OOMA1|PLEIAD	CGNC:2459|Ensembl:ENSGALG00000003377	13	-	SUMO interacting motifs containing 1
GILT	ENSGALG00000003389	protein_coding	-	chr28:3759500-3762347	6.25446	1.06308	5.88336	2.55664	0.06905	0.994263	up
DUS2	ENSGALG00000003407	protein_coding	-	chr11:2885818-2903624	3.73437	1.42183	2.62646	1.39312	0.2461	0.994263	up	415712	DUS2L	CGNC:2482|Ensembl:ENSGALG00000003396	11	-	dihydrouridine synthase 2
cPgC	ENSGALG00000003435	protein_coding	-	chr26:4980961-4984806	0.354071	0	inf	inf	1	1	up
-	ENSGALG00000003440	protein_coding	+	chr14:990416-1002789	0.659811	0	inf	inf	1	1	up
TTC25	ENSGALG00000003464	protein_coding	+	chr27:4726361-4733719	0.716187	0	inf	inf	1	1	up	100857899	METTL3	CGNC:65165|Ensembl:ENSGALG00000003464	27	-	tetratricopeptide repeat domain 25		GO:0005737(cytoplasm)
-	ENSGALG00000003490	protein_coding	+	chr5:181926-188067	3.32215	0.985544	3.37089	1.75313	1	1	up
ARRDC2	ENSGALG00000003527	protein_coding	-	chr28:3810196-3816386	3.32888	0.905352	3.6769	1.87849	1	1	up	771165	-	CGNC:2575|Ensembl:ENSGALG00000003527	28	-	arrestin domain containing 2
ZNF511	ENSGALG00000003533	protein_coding	+	chr6:8904185-8908626	14.9204	4.42383	3.37274	1.75392	0.0998	0.994263	up	428940	ZNF511-PRAP1	CGNC:2578|Ensembl:ENSGALG00000003533	6	-	zinc finger protein 511			GO:0003676(nucleic acid binding)
ARHGAP40	ENSGALG00000003550	protein_coding	-	chr20:4036300-4076622	0.186665	0	inf	inf	1	1	up	419168	C20orf95	CGNC:2591|Ensembl:ENSGALG00000003550	20	-	Rho GTPase activating protein 40				GO:0007165(signal transduction)
PEX11G	ENSGALG00000003561	protein_coding	+	chr28:3817984-3825356	1.61797	0.264066	6.12712	2.61521	1	1	up	420131	-	CGNC:2599|Ensembl:ENSGALG00000043756	28	-	peroxisomal biogenesis factor 11 gamma	gga04146(Peroxisome)	GO:0043234(protein complex)//GO:0005779(integral component of peroxisomal membrane)		GO:0016559(peroxisome fission)//GO:0044375(regulation of peroxisome size)
NPTX2	ENSGALG00000003562	protein_coding	+	chr14:1223939-1234418	0.154548	0	inf	inf	1	1	up	416438	-	CGNC:2600|Ensembl:ENSGALG00000003562	14	-	neuronal pentraxin 2		GO:0005575(cellular_component)	GO:0003674(molecular_function)	GO:0008150(biological_process)//GO:0008306(associative learning)
TMEM130	ENSGALG00000003569	protein_coding	-	chr14:1307063-1316033	4.21707	1.60554	2.62659	1.39319	0.1913	0.994263	up	416439	-	CGNC:2605|Ensembl:ENSGALG00000003569	14	-	transmembrane protein 130		GO:0005887(integral component of plasma membrane)//GO:0005794(Golgi apparatus)
RNF19B	ENSGALG00000003577	protein_coding	-	chr23:5250325-5259999	2.04974	0.760218	2.69624	1.43095	1	1	up	419669	IBRDC3	CGNC:2612	23	-	ring finger protein 19B
RNLS	ENSGALG00000003612	protein_coding	+	chr6:8962082-9024949	0.470904	0	inf	inf	1	1	up	423674	C10orf59|renalase	CGNC:2638|Ensembl:ENSGALG00000029829	6	-	renalase, FAD-dependent amine oxidase			GO:0016491(oxidoreductase activity)	GO:0055114(oxidation-reduction process)
NDUFS5	ENSGALG00000003625	protein_coding	+	chr23:5287780-5289451	6.64064	2.28089	2.91141	1.54172	0.14505	0.994263	up	771510	-	CGNC:2647|Ensembl:ENSGALG00000003625	23	-	NADH:ubiquinone oxidoreductase subunit S5	gga00190(Oxidative phosphorylation)//gga01100(Metabolic pathways)	GO:0005747(mitochondrial respiratory chain complex I)		GO:0032981(mitochondrial respiratory chain complex I assembly)
SVIP	ENSGALG00000003648	protein_coding	-	chr5:3058774-3063026	8.79717	3.26236	2.69656	1.43112	0.0722	0.994263	up	771022	-	CGNC:56445|Ensembl:ENSGALG00000003648	5	-	small VCP interacting protein	gga04141(Protein processing in endoplasmic reticulum)	GO:0036513(Derlin-1 retrotranslocation complex)//GO:0031225(anchored component of membrane)//GO:0070062(extracellular exosome)	GO:0043621(protein self-association)//GO:0051117(ATPase binding)	GO:0010508(positive regulation of autophagy)//GO:0031333(negative regulation of protein complex assembly)//GO:1904153(negative regulation of retrograde protein transport, ER to cytosol)//GO:1903061(positive regulation of protein lipidation)//GO:1903070(negative regulation of ER-associated ubiquitin-dependent protein catabolic process)
NTNG2	ENSGALG00000003677	protein_coding	+	chr17:6448021-6483056	1.46124	0.476845	3.06439	1.6156	1	1	up	417171	netrin-G2	CGNC:21041|Ensembl:ENSGALG00000003677	17	-	netrin G2	gga04514(Cell adhesion molecules (CAMs))	GO:0030424(axon)//GO:0046658(anchored component of plasma membrane)		GO:0007409(axonogenesis)
EBF1	ENSGALG00000003699	protein_coding	+	chr13:10000420-10264193	0.388521	0.158505	2.45117	1.29347	1	1	up	395512	EBF	CGNC:49357|Ensembl:ENSGALG00000003699	13	-	early B-cell factor 1		GO:0005634(nucleus)	GO:0046872(metal ion binding)//GO:0003677(DNA binding)	GO:0007275(multicellular organism development)//GO:0006351(transcription, DNA-templated)//GO:0006355(regulation of transcription, DNA-templated)
PSMD12	ENSGALG00000003700	protein_coding	+	chr18:7416316-7424341	16.0508	6.09591	2.63304	1.39673	0.02365	0.994263	up	417425	-	CGNC:2706|Ensembl:ENSGALG00000026225	18	-	proteasome 26S subunit, non-ATPase 12	gga03050(Proteasome)	GO:0008541(proteasome regulatory particle, lid subcomplex)//GO:0070062(extracellular exosome)//GO:0031595(nuclear proteasome complex)//GO:0005737(cytoplasm)//GO:0016020(membrane)		GO:0043161(proteasome-mediated ubiquitin-dependent protein catabolic process)
USE1	ENSGALG00000003703	protein_coding	-	chr28:3920734-3924954	11.7105	5.02888	2.32864	1.21949	0.0427	0.994263	up	420134	-	CGNC:2709|Ensembl:ENSGALG00000003703	28	-	unconventional SNARE in the ER 1	gga04130(SNARE interactions in vesicular transport)	GO:0016021(integral component of membrane)
THG1L	ENSGALG00000003722	protein_coding	-	chr13:10624186-10630514	7.29175	3.39989	2.14471	1.10078	0.09235	0.994263	up	416242	-	CGNC:2721|Ensembl:ENSGALG00000003722	13	-	tRNA-histidine guanylyltransferase 1 like		GO:0005739(mitochondrion)	GO:0005524(ATP binding)//GO:0000287(magnesium ion binding)//GO:0005525(GTP binding)//GO:0008193(tRNA guanylyltransferase activity)//GO:0042802(identical protein binding)	GO:0006400(tRNA modification)//GO:0051289(protein homotetramerization)//GO:0008033(tRNA processing)
EMC3	ENSGALG00000003738	protein_coding	+	chr12:2749643-2799644	85.1116	42.3249	2.01091	1.00785	0.119	0.994263	up	415936	POB|TMEM111	CGNC:2731|Ensembl:ENSGALG00000003738	12	-	ER membrane protein complex subunit 3		GO:0072546(ER membrane protein complex)		GO:0034975(protein folding in endoplasmic reticulum)
-	ENSGALG00000003796	protein_coding	+	chr2:31248092-31251699	0.471371	0	inf	inf	1	1	up
CALR3	ENSGALG00000003914	protein_coding	+	chr28:4100226-4103457	0.378803	0	inf	inf	1	1	up	420146	CALR	CGNC:2868	28	-	calreticulin 3	gga04141(Protein processing in endoplasmic reticulum)//gga04145(Phagosome)
CYP2W1	ENSGALG00000003917	protein_coding	+	chr14:2242143-2248058	0.912137	0	inf	inf	1	1	up	416453	-	CGNC:50258|Ensembl:ENSGALG00000021238	14	-	cytochrome P450 family 2 subfamily W member 1		GO:0016021(integral component of membrane)	GO:0004497(monooxygenase activity)//GO:0005506(iron ion binding)//GO:0016705(oxidoreductase activity, acting on paired donors, with incorporation or reduction of molecular oxygen)//GO:0020037(heme binding)	GO:0055114(oxidation-reduction process)
ATOH7	ENSGALG00000003931	protein_coding	-	chr6:10135406-10135862	3.03987	0	inf	inf	1	1	up	395388	ATH5	CGNC:2882|Ensembl:ENSGALG00000003931	6	-	atonal bHLH transcription factor 7		GO:0005634(nucleus)	GO:0046983(protein dimerization activity)//GO:0003677(DNA binding)	GO:0009649(entrainment of circadian clock)//GO:0048663(neuron fate commitment)//GO:0003407(neural retina development)//GO:0021554(optic nerve development)//GO:0006351(transcription, DNA-templated)//GO:0030182(neuron differentiation)//GO:0007623(circadian rhythm)//GO:0006355(regulation of transcription, DNA-templated)
TRAF4	ENSGALG00000003987	protein_coding	+	chr19:5824815-5827535	2.15382	0.658948	3.26857	1.70866	1	1	up	417577	-	CGNC:2927|Ensembl:ENSGALG00000003987	19	-	TNF receptor associated factor 4
PPM1M	ENSGALG00000003997	protein_coding	+	chr12:2964625-2970401	4.81435	1.9638	2.45154	1.29369	0.22305	0.994263	up	415941	-	CGNC:2935|Ensembl:ENSGALG00000033277	12	-	protein phosphatase, Mg2+/Mn2+ dependent 1M			GO:0004722(protein serine/threonine phosphatase activity)	GO:0006470(protein dephosphorylation)
GLYCTK	ENSGALG00000004018	protein_coding	+	chr12:2996876-3000960	17.448	8.49056	2.05499	1.03913	0.06625	0.994263	up	427577	-	CGNC:53137|Ensembl:ENSGALG00000004018	12	-	glycerate kinase	gga00260(Glycine, serine and threonine metabolism)//gga00561(Glycerolipid metabolism)//gga00630(Glyoxylate and dicarboxylate metabolism)//gga01100(Metabolic pathways)	GO:0005794(Golgi apparatus)//GO:0005737(cytoplasm)//GO:0005829(cytosol)	GO:0008887(glycerate kinase activity)	GO:0006468(protein phosphorylation)
CRYBA1	ENSGALG00000004035	protein_coding	+	chr19:5961503-5965318	4.39559	1.53611	2.86152	1.51678	0.36685	0.994263	up	396499	-	CGNC:2960|Ensembl:ENSGALG00000004035	19	-	crystallin beta A1			GO:0005212(structural constituent of eye lens)	GO:0007601(visual perception)
-	ENSGALG00000004050	protein_coding	-	chr14:2261357-2266821	1.5507	0.21086	7.35416	2.87856	1	1	up
LRRC38	ENSGALG00000004097	protein_coding	+	chr21:5217682-5230938	0.529789	0	inf	inf	1	1	up	428194	-	CGNC:3005|Ensembl:ENSGALG00000004097	21	-	leucine rich repeat containing 38		GO:0005578(proteinaceous extracellular matrix)//GO:0008076(voltage-gated potassium channel complex)//GO:0005615(extracellular space)	GO:0099104(potassium channel activator activity)//GO:0005249(voltage-gated potassium channel activity)//GO:0044325(ion channel binding)	GO:0007409(axonogenesis)//GO:1903818(positive regulation of voltage-gated potassium channel activity)//GO:0071805(potassium ion transmembrane transport)
STOX1	ENSGALG00000004118	protein_coding	+	chr6:10363678-10367450	0.552689	0	inf	inf	1	1	up	100858074	-	CGNC:66126	6	-	storkhead box 1
AXDND1	ENSGALG00000004173	protein_coding	-	chr8:6124783-6144351	0.243569	0	inf	inf	1	1	up	100858527	C1orf125	CGNC:64562|Ensembl:ENSGALG00000004173	8	-	axonemal dynein light chain domain containing 1
ATOX1	ENSGALG00000004176	protein_coding	+	chr13:12225282-12229414	44.4883	19.8675	2.23924	1.16301	0.12295	0.994263	up	770231	-	CGNC:3066|Ensembl:ENSGALG00000004176	13	-	antioxidant 1 copper chaperone		GO:0005737(cytoplasm)	GO:0016531(copper chaperone activity)//GO:0032767(copper-dependent protein binding)	GO:0006878(cellular copper ion homeostasis)//GO:0015680(intracellular copper ion transport)//GO:0006979(response to oxidative stress)
IL22RA1	ENSGALG00000004221	protein_coding	-	chr23:5614424-5622751	0.373192	0	inf	inf	1	1	up	419692	-	CGNC:3100|Ensembl:ENSGALG00000004221	23	-	interleukin 22 receptor subunit alpha 1	gga04060(Cytokine-cytokine receptor interaction)//gga04630(Jak-STAT signaling pathway)	GO:0005886(plasma membrane)//GO:0016021(integral component of membrane)	GO:0004896(cytokine receptor activity)	GO:0019221(cytokine-mediated signaling pathway)
IFNLR1	ENSGALG00000004231	protein_coding	-	chr23:5625794-5630542	3.66555	1.70824	2.14581	1.10152	0.42115	0.994263	up	419694	CRF2-12|IL-28RA|IL28RA	CGNC:3110|Ensembl:ENSGALG00000004231	23	-	interferon lambda receptor 1	gga04060(Cytokine-cytokine receptor interaction)//gga04630(Jak-STAT signaling pathway)	GO:0005886(plasma membrane)//GO:0016021(integral component of membrane)	GO:0004896(cytokine receptor activity)	GO:0019221(cytokine-mediated signaling pathway)//GO:0051607(defense response to virus)//GO:0034342(response to type III interferon)
ATHL1	ENSGALG00000004234	protein_coding	-	chr5:1603045-1611963	0.643651	0.175055	3.67685	1.87847	1	1	up
ORAI1	ENSGALG00000004240	protein_coding	+	chr15:5574192-5584055	9.82552	4.24192	2.3163	1.21182	0.21465	0.994263	up	416845	TMEM142A|orai-1	CGNC:3116|Ensembl:ENSGALG00000004240	15	-	ORAI calcium release-activated calcium modulator 1	gga04020(Calcium signaling pathway)	GO:0016323(basolateral plasma membrane)//GO:0016020(membrane)//GO:0016021(integral component of membrane)//GO:0043234(protein complex)//GO:0005887(integral component of plasma membrane)	GO:0015279(store-operated calcium channel activity)	GO:0002250(adaptive immune response)//GO:0070509(calcium ion import)//GO:0002115(store-operated calcium entry)//GO:0070588(calcium ion transmembrane transport)//GO:0051928(positive regulation of calcium ion transport)
GRHL3	ENSGALG00000004249	protein_coding	+	chr23:5643782-5679530	0.232719	0	inf	inf	1	1	up	419695	-	CGNC:3123|Ensembl:ENSGALG00000004249	23	-	grainyhead like transcription factor 3
TMIGD1	ENSGALG00000004262	protein_coding	-	chr19:6240501-6243824	0.621228	0	inf	inf	1	1	up	101751326	-	CGNC:70751|Ensembl:ENSGALG00000004262	19	-	transmembrane and immunoglobulin domain containing 1		GO:0016021(integral component of membrane)
ALDH1A2	ENSGALG00000004270	protein_coding	+	chr10:6434757-6661741	0.220465	0	inf	inf	1	1	up	395844	RALDH2	CGNC:3140|Ensembl:ENSGALG00000004270	10	-	aldehyde dehydrogenase 1 family member A2	gga00830(Retinol metabolism)//gga01100(Metabolic pathways)	GO:0005737(cytoplasm)	GO:0001758(retinal dehydrogenase activity)//GO:0004028(3-chloroallyl aldehyde dehydrogenase activity)//GO:0004029(aldehyde dehydrogenase (NAD) activity)//GO:0004745(retinol dehydrogenase activity)	GO:0048738(cardiac muscle tissue development)//GO:0010628(positive regulation of gene expression)//GO:0021915(neural tube development)//GO:0014032(neural crest cell development)//GO:0008285(negative regulation of cell proliferation)//GO:0042574(retinal metabolic process)//GO:0030902(hindbrain development)//GO:0042572(retinol metabolic process)//GO:0043065(positive regulation of apoptotic process)…
RHOF	ENSGALG00000004275	protein_coding	-	chr15:5612620-5620330	0.403355	0	inf	inf	1	1	up	416848	-	CGNC:50359|Ensembl:ENSGALG00000039724	15	-	ras homolog family member F, filopodia associated		GO:0005622(intracellular)//GO:0016020(membrane)	GO:0003924(GTPase activity)//GO:0005525(GTP binding)	GO:0007264(small GTPase mediated signal transduction)
-	ENSGALG00000004367	protein_coding	+	chr4:1197355-1206371	0.547148	0	inf	inf	1	1	up
MAP2K6	ENSGALG00000004370	protein_coding	+	chr18:8260525-8295962	0.337053	0	inf	inf	1	1	up	417445	-	CGNC:50509|Ensembl:ENSGALG00000004370	18	-	mitogen-activated protein kinase kinase 6	gga04010(MAPK signaling pathway)//gga04620(Toll-like receptor signaling pathway)//gga04912(GnRH signaling pathway)//gga05164(Influenza A)	GO:0005634(nucleus)//GO:0005737(cytoplasm)//GO:0005829(cytosol)	GO:0005524(ATP binding)//GO:0019901(protein kinase binding)//GO:0004674(protein serine/threonine kinase activity)	GO:0032147(activation of protein kinase activity)//GO:0000187(activation of MAPK activity)//GO:0000165(MAPK cascade)//GO:0007346(regulation of mitotic cell cycle)//GO:0042981(regulation of apoptotic process)//GO:0060048(cardiac muscle contraction)//GO:0031098(stress-activated protein kinase signaling cascade)//GO:0023014(signal transduction by protein phosphorylation)
PCBP3	ENSGALG00000004394	protein_coding	+	chr7:6711550-6728660	0.911214	0.371605	2.4521	1.29402	1	1	up	100858906	-	CGNC:64206|Ensembl:ENSGALG00000004394	7	-	poly(rC) binding protein 3		GO:0005634(nucleus)//GO:0070062(extracellular exosome)//GO:0005829(cytosol)	GO:0003723(RNA binding)//GO:1990829(C-rich single-stranded DNA binding)//GO:0001227(transcriptional repressor activity, RNA polymerase II transcription regulatory region sequence-specific binding)//GO:0003690(double-stranded DNA binding)	GO:0000122(negative regulation of transcription from RNA polymerase II promoter)
TTC19	ENSGALG00000004416	protein_coding	+	chr19:6449078-6462281	4.58173	1.12109	4.08685	2.03099	0.21615	0.994263	up	417597	-	CGNC:3250|Ensembl:ENSGALG00000004416	19	-	tetratricopeptide repeat domain 19
TP53RK	ENSGALG00000004469	protein_coding	-	chr20:5923592-5925045	2.47204	1.15232	2.14527	1.10116	1	1	up	428145	-	CGNC:3297	20	-	TP53 regulating kinase
AHSA2	ENSGALG00000004483	protein_coding	+	chr3:2166420-2173865	16.3982	6.50679	2.52017	1.33352	0.06265	0.994263	up	421194	-	CGNC:3307|Ensembl:ENSGALG00000004483	3	-	AHA1, activator of heat shock 90kDa protein ATPase homolog 2 (yeast)			GO:0051087(chaperone binding)//GO:0001671(ATPase activator activity)	GO:0032781(positive regulation of ATPase activity)//GO:0006950(response to stress)
-	ENSGALG00000004503	protein_coding	-	chr19:6575680-6578835	1.78725	0	inf	inf	1	1	up
MMD2	ENSGALG00000004530	protein_coding	-	chr14:4031929-4034734	2.29345	0.748236	3.06513	1.61595	1	1	up	416480	-	CGNC:3348|Ensembl:ENSGALG00000004530	14	-	monocyte to macrophage differentiation associated 2		GO:0016021(integral component of membrane)//GO:0048471(perinuclear region of cytoplasm)	GO:0004672(protein kinase activity)	GO:0019835(cytolysis)//GO:0045666(positive regulation of neuron differentiation)//GO:0032880(regulation of protein localization)//GO:0006468(protein phosphorylation)//GO:0045860(positive regulation of protein kinase activity)//GO:0046579(positive regulation of Ras protein signal transduction)
DOLK	ENSGALG00000004556	protein_coding	-	chr17:5401606-5404262	0.980823	0	inf	inf	1	1	up	417199	TMEM15	CGNC:3367|Ensembl:ENSGALG00000026007	17	-	dolichol kinase	gga00510(N-Glycan biosynthesis)//gga01100(Metabolic pathways)	GO:0030176(integral component of endoplasmic reticulum membrane)	GO:0004168(dolichol kinase activity)	GO:0016310(phosphorylation)//GO:0043048(dolichyl monophosphate biosynthetic process)//GO:0006486(protein glycosylation)
CCBL1	ENSGALG00000004604	protein_coding	-	chr17:5284709-5289952	2.46245	0.200906	12.2567	3.6155	1	1	up	417202	-	CGNC:3405	17	-	cysteine conjugate-beta lyase, cytoplasmic	gga00380(Tryptophan metabolism)//gga00450(Selenocompound metabolism)//gga01100(Metabolic pathways)
C17H9ORF114	ENSGALG00000004622	protein_coding	-	chr17:5279479-5284089	5.92937	1.61235	3.67746	1.87871	0.12715	0.994263	up
-	ENSGALG00000004630	protein_coding	-	chr11:9290335-9335423	0.542756	0.0885894	6.12666	2.6151	1	1	up
MYO5C	ENSGALG00000004641	protein_coding	+	chr10:8334754-8365618	0.245026	0.0499914	4.90135	2.29318	1	1	up	430027	-	CGNC:3435|Ensembl:ENSGALG00000033198	10	-	myosin VC		GO:0016459(myosin complex)	GO:0005524(ATP binding)//GO:0003774(motor activity)//GO:0003779(actin binding)
-	ENSGALG00000004645	protein_coding	+	chr17:5265738-5272250	2.39318	0	inf	inf	1	1	up
TRPV1	ENSGALG00000004649	protein_coding	+	chr19:6662819-6673391	0.327778	0.13373	2.45105	1.2934	1	1	up	395259	-	CGNC:3443|Ensembl:ENSGALG00000004649	19	-	transient receptor potential cation channel subfamily V member 1	gga04080(Neuroactive ligand-receptor interaction)	GO:0043005(neuron projection)//GO:0005887(integral component of plasma membrane)	GO:0051219(phosphoprotein binding)//GO:0097603(temperature-gated ion channel activity)//GO:0005262(calcium channel activity)//GO:0005230(extracellular ligand-gated ion channel activity)	GO:0071468(cellular response to acidic pH)//GO:1901594(response to capsazepine)//GO:0050968(detection of chemical stimulus involved in sensory perception of pain)//GO:0002790(peptide secretion)//GO:0001660(fever generation)//GO:0034605(cellular response to heat)//GO:0098703(calcium ion import across plasma membrane)//GO:0050954(sensory perception of mechanical stimulus)//GO:0000122(negative regul…
M2.	ENSGALG00000004721	protein_coding	-	chr14:4438734-4439760	0.4861	0	inf	inf	1	1	up
-	ENSGALG00000004734	protein_coding	+	chr4:1807528-1811398	0.662036	0	inf	inf	1	1	up
TMOD2	ENSGALG00000004740	protein_coding	+	chr10:8537028-8567174	0.13075	0	inf	inf	1	1	up	415422	-	CGNC:3514	10	-	tropomodulin 2
C17H9ORF16	ENSGALG00000004783	protein_coding	-	chr17:5100299-5103578	14.5004	5.80757	2.49682	1.32009	0.03255	0.994263	up	417215	C9orf16	CGNC:3551|Ensembl:ENSGALG00000004783	17	-	chromosome 17 C9orf16 homolog
C1orf50	ENSGALG00000004800	protein_coding	-	chr21:6360386-6364368	3.33469	0.60449	5.51653	2.46376	1	1	up
SEMA6D	ENSGALG00000004844	protein_coding	+	chr10:9404672-9419492	0.592494	0	inf	inf	1	1	up	415430	-	CGNC:3595|Ensembl:ENSGALG00000030542	10	-	semaphorin 6D		GO:0016021(integral component of membrane)
WSCD2	ENSGALG00000004849	protein_coding	+	chr15:6458295-6473510	0.12088	0	inf	inf	1	1	up	416887	-	CGNC:3599|Ensembl:ENSGALG00000004849	15	-	WSC domain containing 2
RASD1	ENSGALG00000004860	protein_coding	-	chr14:4778982-4780829	0.5615	0	inf	inf	1	1	up	416507	-	CGNC:3609|Ensembl:ENSGALG00000004860	14	-	ras related dexamethasone induced 1		GO:0016020(membrane)//GO:0016529(sarcoplasmic reticulum)	GO:0003924(GTPase activity)//GO:0005525(GTP binding)	GO:0007165(signal transduction)
PIH1D3	ENSGALG00000004870	protein_coding	+	chr4:1883585-1891510	6.40674	1.16139	5.51641	2.46373	0.11805	0.994263	up	422184	C4HXORF41|CXorf41|NYSAR97	CGNC:3615	4	-	PIH1 domain containing 3
RPS24	ENSGALG00000004871	protein_coding	-	chr6:12717747-12721551	446.865	216.202	2.06689	1.04746	0.0124	0.994263	up	423726	-	CGNC:3616|Ensembl:ENSGALG00000004871	6	-	ribosomal protein S24	gga03010(Ribosome)	GO:0005840(ribosome)	GO:0003735(structural constituent of ribosome)	GO:0006412(translation)
FAM101B	ENSGALG00000004900	protein_coding	+	chr19:6860578-6996943	0.648785	0.176451	3.67687	1.87848	1	1	up
DRC3	ENSGALG00000004916	protein_coding	+	chr14:4965078-4980252	1.59739	0.651618	2.45142	1.29362	1	1	up	416510	LRRC48	CGNC:3649|Ensembl:ENSGALG00000004916	14	-	dynein regulatory complex subunit 3
TRUB2	ENSGALG00000004920	protein_coding	+	chr17:4987539-4991504	6.46104	1.62197	3.98345	1.99402	0.0784	0.994263	up	417218	-	CGNC:3653	17	-	TruB pseudouridine synthase family member 2
GLRA4	ENSGALG00000004936	protein_coding	+	chr4:1989271-1995319	0.783314	0	inf	inf	1	1	up	769706	-	CGNC:3666|Ensembl:ENSGALG00000004936	4	-	glycine receptor alpha 4		GO:0098794(postsynapse)//GO:0005887(integral component of plasma membrane)//GO:0030054(cell junction)	GO:0016934(extracellular-glycine-gated chloride channel activity)//GO:0016594(glycine binding)//GO:0022824(transmitter-gated ion channel activity)	GO:1902476(chloride transmembrane transport)//GO:0007218(neuropeptide signaling pathway)//GO:0043200(response to amino acid)//GO:0060079(excitatory postsynaptic potential)//GO:0060012(synaptic transmission, glycinergic)
SYN2	ENSGALG00000004955	protein_coding	+	chr12:4654781-4801935	0.584496	0	inf	inf	1	1	up	415963	-	CGNC:3682	12	-	synapsin II
URM1	ENSGALG00000004971	protein_coding	-	chr17:4949345-4967354	13.9691	6.83883	2.0426	1.03041	0.0508	0.994263	up	417221	-	CGNC:3695|Ensembl:ENSGALG00000004971	17	-	ubiquitin related modifier 1	gga04122(Sulfur relay system)	GO:0070062(extracellular exosome)//GO:0005737(cytoplasm)	GO:0016783(sulfurtransferase activity)	GO:0034227(tRNA thio-modification)//GO:0002098(tRNA wobble uridine modification)
DPM2	ENSGALG00000005066	protein_coding	+	chr17:4865440-4867919	7.64062	1.55792	4.90438	2.29407	0.13825	0.994263	up	771539	-	CGNC:3768|Ensembl:ENSGALG00000005066	17	-	dolichyl-phosphate mannosyltransferase subunit 2, regulatory	gga00510(N-Glycan biosynthesis)//gga00563(Glycosylphosphatidylinositol(GPI)-anchor biosynthesis)//gga01100(Metabolic pathways)	GO:0005789(endoplasmic reticulum membrane)//GO:0030176(integral component of endoplasmic reticulum membrane)//GO:0033185(dolichol-phosphate-mannose synthase complex)//GO:0000506(glycosylphosphatidylinositol-N-acetylglucosaminyltransferase (GPI-GnT) complex)	GO:0030234(enzyme regulator activity)//GO:0004582(dolichyl-phosphate beta-D-mannosyltransferase activity)	GO:0035269(protein O-linked mannosylation)//GO:0031647(regulation of protein stability)//GO:0050790(regulation of catalytic activity)//GO:0006506(GPI anchor biosynthetic process)//GO:0019348(dolichol metabolic process)
heme	ENSGALG00000005069	protein_coding	+	chr8:9810425-9819105	0.135408	0	inf	inf	1	1	up
B9D1	ENSGALG00000005096	protein_coding	-	chr14:5223281-5225616	10.0226	4.9033	2.04405	1.03143	0.27825	0.994263	up	416525	EPPB9	CGNC:3794	14	-	B9 domain containing 1
PTPDC1	ENSGALG00000005128	protein_coding	-	chr12:6091176-6103088	0.556645	0.194685	2.85922	1.51562	1	1	up	415979	-	CGNC:3818|Ensembl:ENSGALG00000005128	12	-	protein tyrosine phosphatase domain containing 1		GO:0005654(nucleoplasm)//GO:0005634(nucleus)//GO:0005737(cytoplasm)	GO:0008138(protein tyrosine/serine/threonine phosphatase activity)//GO:0004725(protein tyrosine phosphatase activity)	GO:0060271(cilium assembly)//GO:0035335(peptidyl-tyrosine dephosphorylation)//GO:0007224(smoothened signaling pathway)
FAM96B	ENSGALG00000005132	protein_coding	+	chr11:10655811-10658144	34.9013	15.5975	2.23761	1.16196	0.0313	0.994263	up	415789	-	CGNC:3821|Ensembl:ENSGALG00000005132	11	-	family with sequence similarity 96 member B		GO:0005654(nucleoplasm)//GO:0071817(MMXD complex)//GO:0097361(CIA complex)		GO:0016226(iron-sulfur cluster assembly)//GO:0007059(chromosome segregation)
CA7	ENSGALG00000005178	protein_coding	-	chr11:10773807-10782445	1.13713	0	inf	inf	1	1	up	415791	-	CGNC:3855|Ensembl:ENSGALG00000033720	11	-	carbonic anhydrase 7	gga00910(Nitrogen metabolism)		GO:0004089(carbonate dehydratase activity)//GO:0008270(zinc ion binding)	GO:0006730(one-carbon metabolic process)
MRPL16	ENSGALG00000005182	protein_coding	+	chr5:489303-491033	28.7788	12.5512	2.29289	1.19717	0.07045	0.994263	up	428840	-	CGNC:3858|Ensembl:ENSGALG00000029419	5	-	mitochondrial ribosomal protein L16	gga03010(Ribosome)	GO:0005840(ribosome)	GO:0019843(rRNA binding)//GO:0003735(structural constituent of ribosome)	GO:0006412(translation)
S1PR1	ENSGALG00000005208	protein_coding	-	chr8:10616089-10617229	0.427812	0	inf	inf	1	1	up	424462	EDG1	CGNC:52198	8	-	sphingosine-1-phosphate receptor 1	gga04068(FoxO signaling pathway)//gga04080(Neuroactive ligand-receptor interaction)	GO:0005654(nucleoplasm)//GO:0009897(external side of plasma membrane)//GO:0031226(intrinsic component of plasma membrane)//GO:0016021(integral component of membrane)	GO:0001664(G-protein coupled receptor binding)//GO:0038036(sphingosine-1-phosphate receptor activity)	GO:0008284(positive regulation of cell proliferation)//GO:0030155(regulation of cell adhesion)//GO:0031532(actin cytoskeleton reorganization)//GO:0007420(brain development)//GO:0001955(blood vessel maturation)//GO:0030500(regulation of bone mineralization)//GO:0003245(cardiac muscle tissue growth involved in heart morphogenesis)//GO:0061384(heart trabecula morphogenesis)//GO:0003376(sphingosine-1…
SOX8	ENSGALG00000005263	protein_coding	-	chr14:5739427-5742818	0.857039	0	inf	inf	1	1	up	395483	-	CGNC:49341|Ensembl:ENSGALG00000005263	14	-	SRY-box 8		GO:0044798(nuclear transcription factor complex)//GO:0005634(nucleus)//GO:0005737(cytoplasm)	GO:0000981(RNA polymerase II transcription factor activity, sequence-specific DNA binding)//GO:0000979(RNA polymerase II core promoter sequence-specific DNA binding)//GO:0008134(transcription factor binding)//GO:0046982(protein heterodimerization activity)//GO:0003677(DNA binding)	GO:0003170(heart valve development)//GO:0046533(negative regulation of photoreceptor cell differentiation)//GO:0048709(oligodendrocyte differentiation)//GO:0007283(spermatogenesis)//GO:0072034(renal vesicle induction)//GO:0072197(ureter morphogenesis)//GO:0043066(negative regulation of apoptotic process)//GO:0045444(fat cell differentiation)//GO:0060221(retinal rod cell differentiation)//GO:00606…
TRMT13	ENSGALG00000005290	protein_coding	-	chr8:10868845-10883493	5.86759	1.32963	4.41294	2.14174	0.1009	0.994263	up	424470	CCDC76	CGNC:3937|Ensembl:ENSGALG00000005290	8	-	tRNA methyltransferase 13 homolog			GO:0008175(tRNA methyltransferase activity)	GO:0030488(tRNA methylation)
ANXA7	ENSGALG00000005299	protein_coding	-	chr6:15752204-15762949	8.87368	2.78416	3.1872	1.67229	0.07165	0.994263	up	423747	-	CGNC:3945|Ensembl:ENSGALG00000005299	6	-	annexin A7		GO:0005886(plasma membrane)//GO:0070062(extracellular exosome)//GO:0005635(nuclear envelope)//GO:0005789(endoplasmic reticulum membrane)//GO:0005829(cytosol)//GO:0042584(chromaffin granule membrane)	GO:0003723(RNA binding)//GO:0048306(calcium-dependent protein binding)//GO:0005178(integrin binding)//GO:0005509(calcium ion binding)//GO:0005544(calcium-dependent phospholipid binding)	GO:0010629(negative regulation of gene expression)//GO:0008360(regulation of cell shape)//GO:0009651(response to salt stress)//GO:0009992(cellular water homeostasis)//GO:0035176(social behavior)//GO:0006874(cellular calcium ion homeostasis)//GO:0008283(cell proliferation)//GO:0030855(epithelial cell differentiation)//GO:0007599(hemostasis)//GO:0006914(autophagy)
RPS21	ENSGALG00000005338	protein_coding	-	chr20:8282586-8286470	145.059	53.6298	2.70482	1.43553	0.00135	0.646654	up	419228	-	CGNC:3975|Ensembl:ENSGALG00000005338	20	-	ribosomal protein S21	gga03010(Ribosome)	GO:0022627(cytosolic small ribosomal subunit)	GO:0003723(RNA binding)//GO:0047485(protein N-terminus binding)//GO:0003735(structural constituent of ribosome)	GO:0006412(translation)//GO:0000447(endonucleolytic cleavage in ITS1 to separate SSU-rRNA from 5.8S rRNA and LSU-rRNA from tricistronic rRNA transcript (SSU-rRNA, 5.8S rRNA, LSU-rRNA))//GO:0000461(endonucleolytic cleavage to generate mature 3'-end of SSU-rRNA from (SSU-rRNA, 5.8S rRNA, LSU-rRNA))
WWOX	ENSGALG00000005377	protein_coding	+	chr11:13623071-13643343	1.16217	0	inf	inf	1	1	up	415801	-	CGNC:50085|Ensembl:ENSGALG00000005377	11	-	WW domain containing oxidoreductase		GO:0005634(nucleus)//GO:0005737(cytoplasm)	GO:0016491(oxidoreductase activity)	GO:0055114(oxidation-reduction process)//GO:0016055(Wnt signaling pathway)//GO:0006915(apoptotic process)
SELK	ENSGALG00000005391	protein_coding	-	chr12:7231021-7235079	135.649	61.1792	2.21723	1.14876	0.0121	0.994263	up
MRM1	ENSGALG00000005405	protein_coding	+	chr19:8190422-8197163	10.6921	3.65166	2.92801	1.54992	0.03335	0.994263	up	772219	-	CGNC:4025|Ensembl:ENSGALG00000039523	19	-	mitochondrial rRNA methyltransferase 1			GO:0003723(RNA binding)//GO:0008173(RNA methyltransferase activity)	GO:0006396(RNA processing)//GO:0001510(RNA methylation)
WNT5A	ENSGALG00000005410	protein_coding	-	chr12:7892862-7904972	1.39952	0	inf	inf	1	1	up	395703	-	CGNC:4029|Ensembl:ENSGALG00000034168	12	-	Wnt family member 5A	gga04310(Wnt signaling pathway)//gga04340(Hedgehog signaling pathway)//gga04916(Melanogenesis)	GO:0005578(proteinaceous extracellular matrix)//GO:0005622(intracellular)//GO:0005615(extracellular space)//GO:0009986(cell surface)	GO:0005115(receptor tyrosine kinase-like orphan receptor binding)//GO:0019904(protein domain specific binding)//GO:0005125(cytokine activity)//GO:0003700(transcription factor activity, sequence-specific DNA binding)//GO:0044212(transcription regulatory region DNA binding)//GO:0005110(frizzled-2 binding)//GO:1902379(chemoattractant activity involved in axon guidance)//GO:0005109(frizzled binding)	GO:0008584(male gonad development)//GO:0048843(negative regulation of axon extension involved in axon guidance)//GO:0032755(positive regulation of interleukin-6 production)//GO:0048706(embryonic skeletal system development)//GO:0090103(cochlea morphogenesis)//GO:0010595(positive regulation of endothelial cell migration)//GO:0045766(positive regulation of angiogenesis)//GO:0032729(positive regulat…
RPL3L	ENSGALG00000005458	protein_coding	-	chr14:6122543-6129901	0.729741	0	inf	inf	1	1	up	416542	-	CGNC:4065|Ensembl:ENSGALG00000005458	14	-	ribosomal protein L3 like	gga03010(Ribosome)	GO:0005840(ribosome)	GO:0003735(structural constituent of ribosome)	GO:0006412(translation)
HESX1	ENSGALG00000005506	protein_coding	-	chr12:8535419-8595065	0.739887	0	inf	inf	1	1	up	395864	GANF	CGNC:4101|Ensembl:ENSGALG00000005506	12	-	HESX homeobox 1		GO:0005634(nucleus)	GO:0047485(protein N-terminus binding)//GO:0003682(chromatin binding)//GO:0000978(RNA polymerase II core promoter proximal region sequence-specific DNA binding)//GO:0008022(protein C-terminus binding)//GO:0001078(transcriptional repressor activity, RNA polymerase II core promoter proximal region sequence-specific binding)	GO:0048853(forebrain morphogenesis)//GO:0043584(nose development)//GO:0030916(otic vesicle formation)//GO:0000122(negative regulation of transcription from RNA polymerase II promoter)//GO:0021983(pituitary gland development)
CUEDC1	ENSGALG00000005549	protein_coding	+	chr19:8743458-8748278	2.12564	0.346762	6.12997	2.61588	1	1	up	417665	-	CGNC:50567|Ensembl:ENSGALG00000005549	19	-	CUE domain containing 1
ALG14	ENSGALG00000005583	protein_coding	+	chr8:12328847-12349868	9.0626	2.33415	3.88262	1.95703	0.12235	0.994263	up	424484	calponin-3	CGNC:4158|Ensembl:ENSGALG00000005597	8	-	ALG14, UDP-N-acetylglucosaminyltransferase subunit	gga00510(N-Glycan biosynthesis)//gga01100(Metabolic pathways)	GO:0005913(cell-cell adherens junction)//GO:0015629(actin cytoskeleton)//GO:0005925(focal adhesion)//GO:0005829(cytosol)	GO:0098641(cadherin binding involved in cell-cell adhesion)//GO:0005516(calmodulin binding)//GO:0003779(actin binding)	GO:0098609(cell-cell adhesion)//GO:0030855(epithelial cell differentiation)//GO:0031032(actomyosin structure organization)
SYNGR3	ENSGALG00000005589	protein_coding	+	chr14:6170642-6190153	2.86166	0.778381	3.67644	1.87831	1	1	up	416548	synaptogyrin-3	CGNC:4162|Ensembl:ENSGALG00000005589	14	-	synaptogyrin 3		GO:0016021(integral component of membrane)//GO:0030672(synaptic vesicle membrane)//GO:0031594(neuromuscular junction)	GO:0047485(protein N-terminus binding)//GO:0042169(SH2 domain binding)	GO:0021762(substantia nigra development)//GO:0032411(positive regulation of transporter activity)
PITX3	ENSGALG00000005613	protein_coding	-	chr6:16356821-16374750	1.07787	0	inf	inf	1	1	up	423756	-	CGNC:4177|Ensembl:ENSGALG00000005613	6	-	paired like homeodomain 3		GO:0005634(nucleus)	GO:0001077(transcriptional activator activity, RNA polymerase II core promoter proximal region sequence-specific binding)//GO:0000978(RNA polymerase II core promoter proximal region sequence-specific DNA binding)	GO:0030901(midbrain development)//GO:0048666(neuron development)//GO:0002089(lens morphogenesis in camera-type eye)//GO:0071542(dopaminergic neuron differentiation)//GO:0006366(transcription from RNA polymerase II promoter)//GO:0007626(locomotory behavior)//GO:0045944(positive regulation of transcription from RNA polymerase II promoter)//GO:0070306(lens fiber cell differentiation)
SRRD	ENSGALG00000005614	protein_coding	+	chr15:7156591-7165652	9.78558	2.52022	3.88283	1.95711	0.3522	0.994263	up	416908	-	CGNC:50374|Ensembl:ENSGALG00000005614	15	-	SRR1 domain containing
TRPM2	ENSGALG00000005631	protein_coding	-	chr9:4699123-4712793	0.159447	0	inf	inf	1	1	up	424835	-	CGNC:4193|Ensembl:ENSGALG00000005631	9	-	transient receptor potential cation channel subfamily M member 2		GO:0005765(lysosomal membrane)//GO:0005887(integral component of plasma membrane)//GO:0030659(cytoplasmic vesicle membrane)	GO:0047631(ADP-ribose diphosphatase activity)//GO:0005384(manganese ion transmembrane transporter activity)//GO:0099604(ligand-gated calcium channel activity)	GO:0002407(dendritic cell chemotaxis)//GO:0051209(release of sequestered calcium ion into cytosol)//GO:0033194(response to hydroperoxide)//GO:0009408(response to heat)//GO:0071415(cellular response to purine-containing compound)//GO:0097028(dendritic cell differentiation)//GO:0071502(cellular response to temperature stimulus)//GO:0001659(temperature homeostasis)//GO:0071421(manganese ion transmem…
TMEM150A	ENSGALG00000005649	protein_coding	+	chr6:16480790-16484615	7.86308	1.60286	4.90564	2.29444	0.20735	0.994263	up	423759	BC014685|TMEM150|TMEM150B	CGNC:4206|Ensembl:ENSGALG00000005649	6	-	transmembrane protein 150A		GO:0016021(integral component of membrane)
DNASE1L3	ENSGALG00000005688	protein_coding	-	chr12:8921004-8924545	0.43467	0	inf	inf	1	1	up	416008	-	CGNC:4239|Ensembl:ENSGALG00000005688	12	-	deoxyribonuclease 1 like 3		GO:0005783(endoplasmic reticulum)//GO:0005634(nucleus)	GO:0004519(endonuclease activity)//GO:0004536(deoxyribonuclease activity)	GO:0010623(programmed cell death involved in cell development)//GO:0006309(apoptotic DNA fragmentation)
PAX2	ENSGALG00000005689	protein_coding	-	chr6:16649421-16724596	4.27964	1.83777	2.32871	1.21953	0.181	0.994263	up	395574	PAX-2	CGNC:4240|Ensembl:ENSGALG00000005689	6	-	paired box 2
BIRC7	ENSGALG00000005762	protein_coding	+	chr20:9069123-9075710	1.36633	0.5573	2.4517	1.29378	1	1	up	419239	-	CGNC:4295|Ensembl:ENSGALG00000005762	20	-	baculoviral IAP repeat containing 7	gga04120(Ubiquitin mediated proteolysis)//gga04210(Apoptosis)	GO:0005634(nucleus)//GO:0005737(cytoplasm)	GO:0004842(ubiquitin-protein transferase activity)//GO:0043027(cysteine-type endopeptidase inhibitor activity involved in apoptotic process)	GO:1990001(inhibition of cysteine-type endopeptidase activity involved in apoptotic process)//GO:0006915(apoptotic process)//GO:0009966(regulation of signal transduction)//GO:0090307(mitotic spindle assembly)//GO:0016567(protein ubiquitination)
VILL	ENSGALG00000005763	protein_coding	+	chr2:4562086-4644716	0.531544	0	inf	inf	1	1	up	420415	AVIL	CGNC:4296|Ensembl:ENSGALG00000005763	2	-	villin like			GO:0051015(actin filament binding)	GO:0007010(cytoskeleton organization)
PKD2L1	ENSGALG00000005766	protein_coding	+	chr6:17076627-17100353	0.809482	0	inf	inf	1	1	up	428954	-	CGNC:4298|Ensembl:ENSGALG00000005766	6	-	polycystin 2 like 1, transient receptor potential cation channel		GO:0005886(plasma membrane)//GO:0009986(cell surface)//GO:0043235(receptor complex)//GO:0016020(membrane)//GO:0034704(calcium channel complex)//GO:0097730(non-motile cilium)//GO:0005783(endoplasmic reticulum)	GO:0005272(sodium channel activity)//GO:0033040(sour taste receptor activity)//GO:0015269(calcium-activated potassium channel activity)//GO:0051371(muscle alpha-actinin binding)//GO:0042802(identical protein binding)//GO:0005262(calcium channel activity)//GO:0005509(calcium ion binding)	GO:0035725(sodium ion transmembrane transport)//GO:0071468(cellular response to acidic pH)//GO:0001581(detection of chemical stimulus involved in sensory perception of sour taste)//GO:0071805(potassium ion transmembrane transport)//GO:0050982(detection of mechanical stimulus)//GO:0070207(protein homotrimerization)//GO:0070588(calcium ion transmembrane transport)//GO:0007224(smoothened signaling p…
-	ENSGALG00000005776	protein_coding	-	chr8:12604681-12696378	2.71868	1.27994	2.12407	1.08683	1	1	up
-	ENSGALG00000005778	protein_coding	-	chr15:7691059-7703313	1.27787	0.173772	7.3537	2.87847	1	1	up
DLEC1	ENSGALG00000005826	protein_coding	+	chr2:4660082-4696290	0.590961	0.206685	2.85924	1.51563	1	1	up	420418	-	CGNC:4351|Ensembl:ENSGALG00000005826	2	-	deleted in lung and esophageal cancer 1
-	ENSGALG00000005861	protein_coding	-	chr14:6469557-6472470	1.73974	0.236554	7.35451	2.87863	1	1	up
MARCH8	ENSGALG00000005867	protein_coding	-	chr6:17210805-17295313	2.95238	1.20454	2.45105	1.2934	1	1	up	423770	Mar-08	CGNC:4380|Ensembl:ENSGALG00000005867	6	-	membrane associated ring-CH-type finger 8		GO:0005768(endosome)//GO:0005764(lysosome)//GO:0016021(integral component of membrane)	GO:0004842(ubiquitin-protein transferase activity)//GO:0008270(zinc ion binding)	GO:0000209(protein polyubiquitination)
PGP	ENSGALG00000005888	protein_coding	-	chr14:6487691-6488728	16.5569	4.97217	3.3299	1.73548	0.11585	0.994263	up	416559	AUM|G3PP	CGNC:50285|Ensembl:ENSGALG00000005888	14	-	phosphoglycolate phosphatase	gga00630(Glyoxylate and dicarboxylate metabolism)//gga01100(Metabolic pathways)//gga01200(Carbon metabolism)	GO:0005829(cytosol)	GO:0098519(nucleotide phosphatase activity, acting on free nucleotides)//GO:0000287(magnesium ion binding)//GO:0004721(phosphoprotein phosphatase activity)//GO:0000121(glycerol-1-phosphatase activity)//GO:0008967(phosphoglycolate phosphatase activity)//GO:0043136(glycerol-3-phosphatase activity)//GO:0046872(metal ion binding)//GO:0004725(protein tyrosine phosphatase activity)	GO:0006114(glycerol biosynthetic process)//GO:0045721(negative regulation of gluconeogenesis)//GO:0035335(peptidyl-tyrosine dephosphorylation)//GO:0006650(glycerophospholipid metabolic process)
-	ENSGALG00000005956	protein_coding	-	chr6:17424713-17438731	0.482911	0	inf	inf	1	1	up
KIAA1107	ENSGALG00000005977	protein_coding	-	chr8:13182561-13215620	0.146102	0	inf	inf	1	1	up	424504	BTBD8	CGNC:62478	8	-	KIAA1107
IL13RA1	ENSGALG00000006032	protein_coding	+	chr4:3370854-3382816	2.0183	0.898273	2.24686	1.16791	1	1	up	422230	-	CGNC:51665	4	-	interleukin 13 receptor subunit alpha 1	gga04060(Cytokine-cytokine receptor interaction)//gga04630(Jak-STAT signaling pathway)
-	ENSGALG00000006036	protein_coding	-	chr10:10735631-10772791	12.9611	5.53542	2.34148	1.22742	0.01275	0.994263	up
SNED1	ENSGALG00000006039	protein_coding	+	chr9:4388902-4408558	2.30979	1.0337	2.2345	1.15995	1	1	up	424846	-	CGNC:4526|Ensembl:ENSGALG00000043596	9	-	sushi, nidogen and EGF like domains 1
-	ENSGALG00000006053	protein_coding	+	chr15:8023819-8030876	3.93495	1.48162	2.65584	1.40917	0.23565	0.994263	up
-	ENSGALG00000006093	protein_coding	+	chr8:13508194-13511554	1.95167	0	inf	inf	1	1	up
STMN3	ENSGALG00000006130	protein_coding	+	chr20:10049566-10060098	0.49984	0	inf	inf	1	1	up	419263	NPC2|stathmin-3	CGNC:50952|Ensembl:ENSGALG00000006130	20	-	stathmin 3		GO:0043005(neuron projection)//GO:0005737(cytoplasm)	GO:0015631(tubulin binding)//GO:0019904(protein domain specific binding)	GO:0031175(neuron projection development)//GO:0007019(microtubule depolymerization)//GO:0031110(regulation of microtubule polymerization or depolymerization)//GO:0031122(cytoplasmic microtubule organization)//GO:0051493(regulation of cytoskeleton organization)//GO:0035021(negative regulation of Rac protein signal transduction)//GO:0043087(regulation of GTPase activity)
CCBL2	ENSGALG00000006188	protein_coding	+	chr8:14073560-14091748	4.39462	2.04864	2.14514	1.10107	0.29325	0.994263	up
CHST13	ENSGALG00000006204	protein_coding	+	chr12:10449679-10473797	0.15496	0	inf	inf	1	1	up	416032	-	CGNC:50139|Ensembl:ENSGALG00000029632	12	-	carbohydrate sulfotransferase 13	gga00532(Glycosaminoglycan biosynthesis - chondroitin sulfate / dermatan sulfate)	GO:0016021(integral component of membrane)//GO:0000139(Golgi membrane)	GO:0008146(sulfotransferase activity)	GO:0016051(carbohydrate biosynthetic process)
SERGEF	ENSGALG00000006231	protein_coding	-	chr5:11597390-11834490	0.897144	0	inf	inf	1	1	up	423077	-	CGNC:4679	5	-	secretion regulating guanine nucleotide exchange factor
-	ENSGALG00000006278	protein_coding	-	chr20:9964303-9966357	1.23786	0	inf	inf	1	1	up
CTU2	ENSGALG00000006303	protein_coding	+	chr11:17907682-17930659	5.5982	2.60989	2.14499	1.10097	0.7099	0.994263	up	415850	C16orf84	CGNC:4736	11	-	cytosolic thiouridylase subunit 2	gga04122(Sulfur relay system)
UROC1	ENSGALG00000006306	protein_coding	-	chr12:10667218-10697052	0.289848	0	inf	inf	1	1	up	416035	-	CGNC:4738|Ensembl:ENSGALG00000006306	12	-	urocanate hydratase 1	gga00340(Histidine metabolism)//gga01100(Metabolic pathways)
ING5	ENSGALG00000006317	protein_coding	-	chr9:4276668-4282108	8.3615	2.27248	3.67945	1.87949	0.1874	0.994263	up	424852	-	CGNC:52267|Ensembl:ENSGALG00000006317	9	-	inhibitor of growth family member 5		GO:0070776(MOZ/MORF histone acetyltransferase complex)	GO:0003682(chromatin binding)//GO:0046872(metal ion binding)	GO:2001235(positive regulation of apoptotic signaling pathway)//GO:0016573(histone acetylation)//GO:0008285(negative regulation of cell proliferation)
IL16	ENSGALG00000006388	protein_coding	-	chr10:11600709-11632184	1.36233	0.15882	8.57787	3.10062	1	1	up	374270	interleukin-16	CGNC:4808|Ensembl:ENSGALG00000006388	10	-	interleukin 16		GO:0005886(plasma membrane)//GO:0016607(nuclear speck)//GO:0005615(extracellular space)//GO:0005829(cytosol)	GO:0042609(CD4 receptor binding)//GO:0005125(cytokine activity)	GO:0030595(leukocyte chemotaxis)//GO:0051924(regulation of calcium ion transport)//GO:0050930(induction of positive chemotaxis)
PODXL	ENSGALG00000006409	protein_coding	+	chr1:2987399-3028096	1.33882	0.273143	4.90152	2.29323	1	1	up	395755	MEP21|PC|PCLP-1	CGNC:49459|Ensembl:ENSGALG00000006409	1	-	podocalyxin like		GO:0005886(plasma membrane)//GO:0030027(lamellipodium)//GO:0030175(filopodium)//GO:0016021(integral component of membrane)//GO:0001726(ruffle)//GO:0045121(membrane raft)//GO:0031528(microvillus membrane)//GO:0005737(cytoplasm)//GO:0016324(apical plasma membrane)		GO:0033634(positive regulation of cell-cell adhesion mediated by integrin)//GO:0022408(negative regulation of cell-cell adhesion)//GO:0007155(cell adhesion)//GO:0016477(cell migration)//GO:0022407(regulation of cell-cell adhesion)//GO:0072175(epithelial tube formation)//GO:0030335(positive regulation of cell migration)//GO:0032534(regulation of microvillus assembly)
-	ENSGALG00000006463	protein_coding	-	chr12:11249995-11253626	14.4419	6.71072	2.15206	1.10572	0.42115	0.994263	up
PDRG1	ENSGALG00000006464	protein_coding	-	chr20:10431991-10433839	25.3859	10.0344	2.5299	1.33908	0.07625	0.994263	up	771852	-	CGNC:4872|Ensembl:ENSGALG00000035111	20	-	p53 and DNA damage regulated 1		GO:0016272(prefoldin complex)	GO:0051082(unfolded protein binding)	GO:0006457(protein folding)
XKR7	ENSGALG00000006467	protein_coding	+	chr20:10436887-10443076	0.592156	0	inf	inf	1	1	up	771861	-	CGNC:4874	20	-	XK related 7
SLCO2A1	ENSGALG00000006471	protein_coding	+	chr9:4063858-4088360	0.189288	0	inf	inf	1	1	up	424862	-	CGNC:4877|Ensembl:ENSGALG00000006471	9	-	solute carrier organic anion transporter family member 2A1		GO:0005886(plasma membrane)//GO:0016021(integral component of membrane)	GO:0015132(prostaglandin transmembrane transporter activity)	GO:0015732(prostaglandin transport)
RPP30	ENSGALG00000006486	protein_coding	+	chr6:19176485-19192026	12.5714	2.69749	4.66039	2.22045	0.09325	0.994263	up	423795	-	CGNC:4889|Ensembl:ENSGALG00000006486	6	-	ribonuclease P/MRP subunit p30	gga03008(Ribosome biogenesis in eukaryotes)//gga03013(RNA transport)	GO:0005840(ribosome)//GO:0005655(nucleolar ribonuclease P complex)//GO:0000172(ribonuclease MRP complex)	GO:0003723(RNA binding)//GO:0004526(ribonuclease P activity)//GO:0003735(structural constituent of ribosome)	GO:0006412(translation)//GO:0090502(RNA phosphodiester bond hydrolysis, endonucleolytic)//GO:0001682(tRNA 5'-leader removal)//GO:0008033(tRNA processing)
PTPRN2	ENSGALG00000006498	protein_coding	-	chr2:8785741-9406733	2.03136	0.386813	5.2515	2.39273	1	1	up	420449	-	CGNC:4899|Ensembl:ENSGALG00000030054	2	-	protein tyrosine phosphatase, receptor type N2
C11orf63	ENSGALG00000006518	protein_coding	-	chr24:3099782-3116043	0.493275	0.161015	3.06352	1.61519	1	1	up	101749107	C24H11ORF63	CGNC:68581	24	-	chromosome 11 open reading frame 63
PEX11A	ENSGALG00000006534	protein_coding	+	chr10:12308862-12310941	1.07215	0.437185	2.45239	1.29419	1	1	up	415486	-	CGNC:4928	10	-	peroxisomal biogenesis factor 11 alpha	gga04146(Peroxisome)
C9H21ORF2	ENSGALG00000006539	protein_coding	-	chr9:3889062-3895065	16.076	6.66891	2.41058	1.26938	0.037	0.994263	up	424866	C21orf2	CGNC:4930|Ensembl:ENSGALG00000006539	9	-	chromosome 9 C21orf2 homolog
-	ENSGALG00000006565	protein_coding	-	chr15:8378112-8403920	0.714271	0	inf	inf	1	1	up
CRYGS	ENSGALG00000006574	protein_coding	-	chr9:3846575-3850374	1.89713	0	inf	inf	1	1	up	429134	-	CGNC:4958|Ensembl:ENSGALG00000006574	9	-	crystallin gamma S			GO:0005212(structural constituent of eye lens)	GO:0002088(lens development in camera-type eye)//GO:0002009(morphogenesis of an epithelium)
-	ENSGALG00000006582	protein_coding	+	chr24:3282748-3322693	3.42695	0.698363	4.90713	2.29488	1	1	up
DZIP1L	ENSGALG00000006597	protein_coding	+	chr9:3613512-3623335	1.10405	0.300326	3.67619	1.87821	1	1	up	424872	-	CGNC:52272	9	-	DAZ interacting zinc finger protein 1 like
EPHB1	ENSGALG00000006609	protein_coding	+	chr9:3230462-3257134	0.268314	0	inf	inf	1	1	up	396177	CEK6|EK6	CGNC:4986|Ensembl:ENSGALG00000006609	9	-	EPH receptor B1		GO:0005887(integral component of plasma membrane)//GO:0030425(dendrite)//GO:0030424(axon)//GO:0031901(early endosome membrane)//GO:0045121(membrane raft)//GO:0032433(filopodium tip)//GO:0005737(cytoplasm)	GO:0005003(ephrin receptor activity)//GO:0005524(ATP binding)//GO:0008046(axon guidance receptor activity)//GO:0005005(transmembrane-ephrin receptor activity)//GO:0032403(protein complex binding)	GO:0046777(protein autophosphorylation)//GO:0048593(camera-type eye morphogenesis)//GO:0070372(regulation of ERK1 and ERK2 cascade)//GO:0060996(dendritic spine development)//GO:0048013(ephrin receptor signaling pathway)//GO:0018108(peptidyl-tyrosine phosphorylation)//GO:0021952(central nervous system projection neuron axonogenesis)//GO:0021631(optic nerve morphogenesis)//GO:0060997(dendritic spin…
TMEM41A	ENSGALG00000006649	protein_coding	-	chr9:3151884-3153694	9.97229	2.43994	4.08711	2.03108	0.09845	0.994263	up	424875	-	CGNC:5020|Ensembl:ENSGALG00000006649	9	-	transmembrane protein 41A		GO:0016021(integral component of membrane)
RLBP1	ENSGALG00000006676	protein_coding	+	chr10:12468869-12473591	0.610373	0	inf	inf	1	1	up	415492	-	CGNC:5041|Ensembl:ENSGALG00000006676	10	-	retinaldehyde binding protein 1		GO:0005622(intracellular)	GO:0005215(transporter activity)//GO:0016918(retinal binding)	GO:0006810(transport)//GO:0007601(visual perception)
BEND7	ENSGALG00000006682	protein_coding	-	chr1:6662890-6709023	14.0033	6.31265	2.21829	1.14945	0.08765	0.994263	up	419037	C10orf30	CGNC:5047|Ensembl:ENSGALG00000006682	1	-	BEN domain containing 7		GO:0070062(extracellular exosome)
RPS15A	ENSGALG00000006771	protein_coding	-	chr14:8308818-8312886	791.991	393.046	2.01501	1.01079	0.0149	0.994263	up	427675	-	CGNC:5109|Ensembl:ENSGALG00000006771	14	-	ribosomal protein S15a	gga03010(Ribosome)	GO:0016020(membrane)//GO:0005739(mitochondrion)//GO:0031012(extracellular matrix)//GO:0070062(extracellular exosome)//GO:0022627(cytosolic small ribosomal subunit)	GO:0003723(RNA binding)//GO:0003735(structural constituent of ribosome)	GO:0006412(translation)//GO:0009615(response to virus)//GO:0008284(positive regulation of cell proliferation)//GO:0045787(positive regulation of cell cycle)
TRMT12	ENSGALG00000006773	protein_coding	+	chr4:5138130-5141310	0.966834	0.197206	4.90268	2.29357	1	1	up	422259	-	CGNC:5110	4	-	tRNA methyltransferase 12 homolog
VSTM2L	ENSGALG00000006792	protein_coding	-	chr20:10761590-10764145	1.26565	0	inf	inf	1	1	up	419297	-	CGNC:5126	20	-	V-set and transmembrane domain containing 2 like
SYT17	ENSGALG00000006845	protein_coding	-	chr14:8415693-8444068	4.43356	1.50732	2.94135	1.55648	0.08885	0.994263	up	416608	-	CGNC:5168|Ensembl:ENSGALG00000030534	14	-	synaptotagmin 17		GO:0016020(membrane)		GO:0006887(exocytosis)
MCTP2	ENSGALG00000006981	protein_coding	+	chr10:14461078-14573856	0.41689	0.17011	2.45071	1.2932	1	1	up	426324	-	CGNC:52745|Ensembl:ENSGALG00000030157	10	-	multiple C2 and transmembrane domain containing 2		GO:0016021(integral component of membrane)
MMP9	ENSGALG00000006992	protein_coding	+	chr20:10917367-10921453	0.359662	0	inf	inf	1	1	up	395387	-	CGNC:49293|Ensembl:ENSGALG00000006992	20	-	matrix metallopeptidase 9		GO:0031012(extracellular matrix)//GO:0070062(extracellular exosome)	GO:0008270(zinc ion binding)//GO:0004222(metalloendopeptidase activity)//GO:0042802(identical protein binding)	GO:1900122(positive regulation of receptor binding)//GO:0030574(collagen catabolic process)//GO:2001243(negative regulation of intrinsic apoptotic signaling pathway)//GO:0035987(endodermal cell differentiation)//GO:0030198(extracellular matrix organization)//GO:2001268(negative regulation of cysteine-type endopeptidase activity involved in apoptotic signaling pathway)//GO:0001501(skeletal system …
REXO2	ENSGALG00000007024	protein_coding	+	chr24:4392699-4567637	14.8037	6.62118	2.23581	1.1608	0.50025	0.994263	up	419761	SMFN	CGNC:5300|Ensembl:ENSGALG00000035980	24	-	RNA exonuclease 2	gga03008(Ribosome biogenesis in eukaryotes)		GO:0003676(nucleic acid binding)//GO:0016788(hydrolase activity, acting on ester bonds)
OTOA	ENSGALG00000007070	protein_coding	+	chr14:8746591-8776869	0.108094	0	inf	inf	1	1	up	416624	-	CGNC:5340|Ensembl:ENSGALG00000007070	14	-	otoancorin
CPN1	ENSGALG00000007090	protein_coding	+	chr6:21583528-21590251	2.24199	0	inf	inf	1	1	up	769143	-	CGNC:5352|Ensembl:ENSGALG00000007090	6	-	carboxypeptidase N subunit 1		GO:0097060(synaptic membrane)//GO:0043025(neuronal cell body)//GO:0005794(Golgi apparatus)//GO:0005615(extracellular space)//GO:0030141(secretory granule)	GO:0008270(zinc ion binding)//GO:0004181(metallocarboxypeptidase activity)//GO:0004185(serine-type carboxypeptidase activity)	GO:0030070(insulin processing)
-	ENSGALG00000007096	protein_coding	+	chr13:16453955-16455280	5.03835	1.02741	4.90394	2.29394	0.20735	0.994263	up
POP5	ENSGALG00000007124	protein_coding	+	chr15:9256505-9274697	5.15992	1.29506	3.98431	1.99433	0.5187	0.994263	up	416973	-	CGNC:5381|Ensembl:ENSGALG00000007124	15	-	POP5 homolog, ribonuclease P/MRP subunit	gga03008(Ribosome biogenesis in eukaryotes)//gga03013(RNA transport)	GO:0005655(nucleolar ribonuclease P complex)//GO:0000172(ribonuclease MRP complex)	GO:0004526(ribonuclease P activity)	GO:0090502(RNA phosphodiester bond hydrolysis, endonucleolytic)//GO:0001682(tRNA 5'-leader removal)//GO:0009249(protein lipoylation)
-	ENSGALG00000007133	protein_coding	+	chr14:8830839-8832774	12.9488	3.50901	3.69018	1.88369	0.31605	0.994263	up
MED28	ENSGALG00000007138	protein_coding	-	chr4:75551240-75553275	24.4694	11.3482	2.15623	1.10851	0.0675	0.994263	up	425350	-	CGNC:5393|Ensembl:ENSGALG00000007138	4	-	mediator complex subunit 28		GO:0030864(cortical actin cytoskeleton)//GO:0016592(mediator complex)		GO:0019827(stem cell population maintenance)//GO:0051151(negative regulation of smooth muscle cell differentiation)
COQ5	ENSGALG00000007185	protein_coding	+	chr15:9281712-9287429	4.94515	2.42048	2.04304	1.03072	0.27825	0.994263	up	416975	-	CGNC:5430|Ensembl:ENSGALG00000007185	15	-	coenzyme Q5, methyltransferase	gga00130(Ubiquinone and other terpenoid-quinone biosynthesis)//gga01100(Metabolic pathways)	GO:0043234(protein complex)//GO:0005743(mitochondrial inner membrane)//GO:0005759(mitochondrial matrix)//GO:0031314(extrinsic component of mitochondrial inner membrane)	GO:0008425(2-polyprenyl-6-methoxy-1,4-benzoquinone methyltransferase activity)//GO:0102005(2-octaprenyl-6-methoxy-1,4-benzoquinone methylase activity)	GO:0006744(ubiquinone biosynthetic process)//GO:0032259(methylation)
TRIAP1	ENSGALG00000007199	protein_coding	+	chr15:9293940-9294931	28.4974	10.2672	2.77558	1.47279	0.0438	0.994263	up	416977	-	CGNC:5441|Ensembl:ENSGALG00000007199	15	-	TP53 regulated inhibitor of apoptosis 1		GO:0043234(protein complex)//GO:0005654(nucleoplasm)//GO:0005758(mitochondrial intermembrane space)	GO:0002039(p53 binding)//GO:1990050(phosphatidic acid transporter activity)	GO:0030330(DNA damage response, signal transduction by p53 class mediator)//GO:0015914(phospholipid transport)//GO:0090201(negative regulation of release of cytochrome c from mitochondria)//GO:0043154(negative regulation of cysteine-type endopeptidase activity involved in apoptotic process)//GO:1902166(negative regulation of intrinsic apoptotic signaling pathway in response to DNA damage by p53 c…
UTS2D	ENSGALG00000007222	protein_coding	+	chr9:13178353-13185135	0.4781	0	inf	inf	1	1	up
CNGA2	ENSGALG00000007282	protein_coding	-	chr4:10889949-10892483	0.813608	0	inf	inf	1	1	up	771609	-	CGNC:5504	4	-	cyclic nucleotide gated channel alpha 2
NME1	ENSGALG00000007305	protein_coding	-	chr18:10253362-10256902	1.09706	0.17902	6.12814	2.61545	1	1	up	422094	-	CGNC:5522|Ensembl:ENSGALG00000007305	18	-	NME/NM23 nucleoside diphosphate kinase 1	gga00230(Purine metabolism)//gga00240(Pyrimidine metabolism)//gga01100(Metabolic pathways)	GO:0005622(intracellular)	GO:0005524(ATP binding)//GO:0004550(nucleoside diphosphate kinase activity)	GO:0006228(UTP biosynthetic process)//GO:0006241(CTP biosynthetic process)//GO:0006183(GTP biosynthetic process)//GO:0006165(nucleoside diphosphate phosphorylation)//GO:0042981(regulation of apoptotic process)
CILP	ENSGALG00000007358	protein_coding	-	chr10:17290314-17300075	0.240972	0.0983198	2.4509	1.29331	1	1	up	415533	-	CGNC:5560|Ensembl:ENSGALG00000007358	10	-	cartilage intermediate layer protein		GO:0031012(extracellular matrix)//GO:0070062(extracellular exosome)		GO:0043569(negative regulation of insulin-like growth factor receptor signaling pathway)
ANKRD40	ENSGALG00000007389	protein_coding	+	chr18:10407625-10414276	2.33691	0.953454	2.45098	1.29336	1	1	up	428678	-	CGNC:13980|Ensembl:ENSGALG00000007389	18	-	ankyrin repeat domain 40
CD3E	ENSGALG00000007416	protein_coding	+	chr24:5471598-5478513	8.64376	2.8212	3.06386	1.61535	0.02245	0.994263	up	396062	-	CGNC:5597|Ensembl:ENSGALG00000007416	24	-	CD3e molecule		GO:0001772(immunological synapse)//GO:0009897(external side of plasma membrane)//GO:0042105(alpha-beta T cell receptor complex)//GO:0005886(plasma membrane)//GO:0016021(integral component of membrane)//GO:0044297(cell body)//GO:0043197(dendritic spine)//GO:0005911(cell-cell junction)	GO:0017124(SH3 domain binding)//GO:0046982(protein heterodimerization activity)//GO:0004888(transmembrane signaling receptor activity)//GO:0042803(protein homodimerization activity)	GO:0010629(negative regulation of gene expression)//GO:0046641(positive regulation of alpha-beta T cell proliferation)//GO:0050850(positive regulation of calcium-mediated signaling)//GO:0002376(immune system process)//GO:0010628(positive regulation of gene expression)//GO:0045086(positive regulation of interleukin-2 biosynthetic process)//GO:0032753(positive regulation of interleukin-4 production…
CD3D	ENSGALG00000007418	protein_coding	-	chr24:5480465-5482943	1.34519	0	inf	inf	1	1	up	396518	CD3	CGNC:49849|Ensembl:ENSGALG00000007418	24	-	CD3d molecule		GO:0016021(integral component of membrane)	GO:0004888(transmembrane signaling receptor activity)	GO:0007166(cell surface receptor signaling pathway)
MKX	ENSGALG00000007426	protein_coding	+	chr2:15606689-15649798	1.37768	0.562115	2.45088	1.2933	1	1	up	771284	-	CGNC:5605|Ensembl:ENSGALG00000007426	2	-	mohawk homeobox		GO:0005634(nucleus)	GO:0043565(sequence-specific DNA binding)	GO:0006355(regulation of transcription, DNA-templated)
CETN2	ENSGALG00000007510	protein_coding	+	chr4:11242848-11246561	8.67945	3.53625	2.45442	1.29538	0.3686	0.994263	up	422303	-	CGNC:51692|Ensembl:ENSGALG00000007510	4	-	centrin 2	gga03420(Nucleotide excision repair)	GO:0005813(centrosome)//GO:0005814(centriole)//GO:0036064(ciliary basal body)//GO:0071942(XPC complex)//GO:0032391(photoreceptor connecting cilium)	GO:0031683(G-protein beta/gamma-subunit complex binding)//GO:0008017(microtubule binding)//GO:0032795(heterotrimeric G-protein binding)//GO:0005509(calcium ion binding)	GO:0007099(centriole replication)//GO:0032465(regulation of cytokinesis)//GO:0006289(nucleotide-excision repair)//GO:0007283(spermatogenesis)
ANKRD2	ENSGALG00000007539	protein_coding	-	chr6:21863721-21866526	1.31101	0	inf	inf	1	1	up	423841	-	CGNC:5688	6	-	ankyrin repeat domain 2
PDSS1	ENSGALG00000007559	protein_coding	-	chr2:15977930-15999697	10.9745	4.47594	2.45187	1.29388	0.09785	0.994263	up	420490	TPRT	CGNC:5705|Ensembl:ENSGALG00000007559	2	-	prenyl (decaprenyl) diphosphate synthase, subunit 1	gga00900(Terpenoid backbone biosynthesis)	GO:1990234(transferase complex)//GO:0005739(mitochondrion)	GO:0046982(protein heterodimerization activity)//GO:0000010(trans-hexaprenyltranstransferase activity)//GO:0050347(trans-octaprenyltranstransferase activity)	GO:0006744(ubiquinone biosynthetic process)//GO:0051290(protein heterotetramerization)//GO:0008299(isoprenoid biosynthetic process)
-	ENSGALG00000007564	protein_coding	+	chr2:15999841-16026228	7.91277	3.29739	2.39971	1.26286	0.0165	0.994263	up
ANKRD60	ENSGALG00000007624	protein_coding	+	chr20:11597708-11601338	1.24056	0	inf	inf	1	1	up	419320	C20orf86	CGNC:5755|Ensembl:ENSGALG00000007624	20	-	ankyrin repeat domain 60
SLC9A3R1	ENSGALG00000007650	protein_coding	+	chr18:10711116-10718410	1.25633	0.615	2.0428	1.03055	1	1	up
MYCBPAP	ENSGALG00000007661	protein_coding	-	chr18:10601556-10611079	2.70844	1.105	2.45107	1.29341	1	1	up	422101	RSAD1	CGNC:5783	18	-	MYCBP associated protein
CXCR5	ENSGALG00000007675	protein_coding	+	chr24:5590150-5595172	1.31667	0	inf	inf	1	1	up	419784	BLR1|CRL1	CGNC:51092|Ensembl:ENSGALG00000007675	24	-	C-X-C motif chemokine receptor 5	gga04060(Cytokine-cytokine receptor interaction)	GO:0009897(external side of plasma membrane)//GO:0016021(integral component of membrane)	GO:0016494(C-X-C chemokine receptor activity)	GO:0032467(positive regulation of cytokinesis)//GO:0070098(chemokine-mediated signaling pathway)//GO:0042113(B cell activation)//GO:0048535(lymph node development)//GO:0030595(leukocyte chemotaxis)//GO:0006955(immune response)//GO:0007186(G-protein coupled receptor signaling pathway)
HTR2B	ENSGALG00000007681	protein_coding	-	chr9:14616053-14669519	1.01706	0	inf	inf	1	1	up	395581	-	CGNC:5801|Ensembl:ENSGALG00000007681	9	-	5-hydroxytryptamine receptor 2B	gga04020(Calcium signaling pathway)//gga04080(Neuroactive ligand-receptor interaction)//gga04540(Gap junction)	GO:0005887(integral component of plasma membrane)//GO:0005737(cytoplasm)	GO:0001965(G-protein alpha-subunit binding)//GO:0005096(GTPase activator activity)//GO:0004993(G-protein coupled serotonin receptor activity)//GO:0051378(serotonin binding)//GO:0030594(neurotransmitter receptor activity)//GO:0008144(drug binding)	GO:0050715(positive regulation of cytokine secretion)//GO:0006182(cGMP biosynthetic process)//GO:0051781(positive regulation of cell division)//GO:0043123(positive regulation of I-kappaB kinase/NF-kappaB signaling)//GO:0042310(vasoconstriction)//GO:0002031(G-protein coupled receptor internalization)//GO:0043066(negative regulation of apoptotic process)//GO:0003300(cardiac muscle hypertrophy)//GO:…
-	ENSGALG00000007692	protein_coding	-	chr20:12310234-12312205	0.641815	0	inf	inf	1	1	up
B3GNT7	ENSGALG00000007701	protein_coding	+	chr9:14744528-14748605	0.957727	0.195349	4.90264	2.29356	1	1	up	424930	-	CGNC:5819	9	-	UDP-GlcNAc:betaGal beta-1,3-N-acetylglucosaminyltransferase 7	gga00533(Glycosaminoglycan biosynthesis - keratan sulfate)	GO:0016021(integral component of membrane)//GO:0000139(Golgi membrane)	GO:0008378(galactosyltransferase activity)	GO:0006486(protein glycosylation)
-	ENSGALG00000007703	protein_coding	-	chr4:12130083-12158495	0.285751	0	inf	inf	1	1	up
SLC37A4	ENSGALG00000007716	protein_coding	-	chr24:5661175-5668655	4.22587	1.88023	2.24753	1.16834	0.3391	0.994263	up	419789	-	CGNC:5833|Ensembl:ENSGALG00000007716	24	-	solute carrier family 37 member 4		GO:0005623(cell)//GO:0016021(integral component of membrane)	GO:0005215(transporter activity)	GO:0032682(negative regulation of chemokine production)//GO:0005977(glycogen metabolic process)//GO:0006641(triglyceride metabolic process)//GO:0001816(cytokine production)//GO:0042593(glucose homeostasis)//GO:0006874(cellular calcium ion homeostasis)//GO:0015760(glucose-6-phosphate transport)//GO:0045730(respiratory burst)//GO:0055085(transmembrane transport)//GO:0035166(post-embryonic hemopoies…
CASS4	ENSGALG00000007744	protein_coding	-	chr20:12336093-12351860	0.35871	0	inf	inf	1	1	up	419330	C20orf32	CGNC:5856	20	-	Cas scaffolding protein family member 4
TMEFF2	ENSGALG00000007759	protein_coding	-	chr7:7716438-7883898	2.01902	0.988523	2.04246	1.03031	1	1	up	768542	-	CGNC:5866	7	-	transmembrane protein with EGF like and two follistatin like domains 2
HID1	ENSGALG00000007808	protein_coding	-	chr18:10843601-10865535	0.923658	0.150732	6.1278	2.61537	1	1	up	422113	C17ORF28|C18H17orf28|DMC1|HID-1	CGNC:5904|Ensembl:ENSGALG00000007808	18	-	HID1 domain containing		GO:0070062(extracellular exosome)//GO:0000138(Golgi trans cisterna)//GO:0005881(cytoplasmic microtubule)//GO:0090498(extrinsic component of Golgi membrane)//GO:0016020(membrane)//GO:0005829(cytosol)//GO:0005797(Golgi medial cisterna)		GO:0031001(response to brefeldin A)//GO:0006886(intracellular protein transport)
-	ENSGALG00000007840	protein_coding	-	chr15:10804519-10813425	9.47163	4.56513	2.07478	1.05296	0.1924	0.994263	up
-	ENSGALG00000007867	protein_coding	-	chr11:1326326-1335740	0.490088	0.1333	3.67657	1.87836	1	1	up
PIH1D2	ENSGALG00000007885	protein_coding	+	chr24:6176796-6188311	2.24755	0.916816	2.45147	1.29365	1	1	up	419795	-	CGNC:5964	24	-	PIH1 domain containing 2
COMMD3	ENSGALG00000007900	protein_coding	-	chr2:17625278-17653946	6.02814	1.96626	3.06579	1.61626	0.2248	0.994263	up	101749710	-	-	2	-	COMM domain containing 3
ATP9A	ENSGALG00000007912	protein_coding	+	chr20:13454133-13507093	0.480378	0.196001	2.4509	1.29331	1	1	up	419345	-	CGNC:5985|Ensembl:ENSGALG00000007912	20	-	ATPase phospholipid transporting 9A (putative)		GO:0005768(endosome)//GO:0005886(plasma membrane)//GO:0005802(trans-Golgi network)//GO:0055037(recycling endosome)//GO:0048471(perinuclear region of cytoplasm)//GO:0016021(integral component of membrane)//GO:0005769(early endosome)	GO:0005524(ATP binding)//GO:0000287(magnesium ion binding)//GO:0004012(phospholipid-translocating ATPase activity)	GO:0006897(endocytosis)//GO:0045332(phospholipid translocation)//GO:0006890(retrograde vesicle-mediated transport, Golgi to ER)
LRRC4C	ENSGALG00000007948	protein_coding	-	chr5:19803070-19804987	0.470826	0	inf	inf	1	1	up	428862	-	CGNC:6012|Ensembl:ENSGALG00000007948	5	-	leucine rich repeat containing 4C	gga04514(Cell adhesion molecules (CAMs))	GO:0016021(integral component of membrane)//GO:0005615(extracellular space)//GO:0005737(cytoplasm)	GO:0004860(protein kinase inhibitor activity)	GO:0006469(negative regulation of protein kinase activity)//GO:0019221(cytokine-mediated signaling pathway)//GO:0050770(regulation of axonogenesis)//GO:0046426(negative regulation of JAK-STAT cascade)
-	ENSGALG00000007962	protein_coding	-	chr2:18662491-18733075	0.624429	0	inf	inf	1	1	up
MOCS3	ENSGALG00000007986	protein_coding	-	chr20:13729489-13730896	13.6943	6.26691	2.18518	1.12775	0.08895	0.994263	up	769390	-	CGNC:6043|Ensembl:ENSGALG00000007986	20	-	molybdenum cofactor synthesis 3	gga04122(Sulfur relay system)	GO:0005737(cytoplasm)//GO:0005829(cytosol)	GO:0005524(ATP binding)//GO:0061604(molybdopterin-synthase sulfurtransferase activity)//GO:0042292(URM1 activating enzyme activity)//GO:0004792(thiosulfate sulfurtransferase activity)//GO:0046872(metal ion binding)//GO:0061605(molybdopterin-synthase adenylyltransferase activity)//GO:0016779(nucleotidyltransferase activity)	GO:0006777(Mo-molybdopterin cofactor biosynthetic process)//GO:0032447(protein urmylation)//GO:0002143(tRNA wobble position uridine thiolation)//GO:0018192(enzyme active site formation via cysteine modification to L-cysteine persulfide)
-	ENSGALG00000007997	protein_coding	+	chr5:21006094-21019310	4.50555	1.72338	2.61436	1.38646	0.08095	0.994263	up
SLC25A19	ENSGALG00000008011	protein_coding	-	chr18:11006335-11012231	1.23722	0.201883	6.1284	2.61551	1	1	up	422123	-	CGNC:6063|Ensembl:ENSGALG00000008011	18	-	solute carrier family 25 member 19		GO:0031305(integral component of mitochondrial inner membrane)//GO:0005634(nucleus)	GO:0015234(thiamine transmembrane transporter activity)	GO:0030974(thiamine pyrophosphate transport)//GO:0071934(thiamine transmembrane transport)//GO:0006839(mitochondrial transport)
HORMAD2	ENSGALG00000008037	protein_coding	-	chr15:10892489-10904522	3.02283	0	inf	inf	1	1	up	417012	-	CGNC:6081|Ensembl:ENSGALG00000008037	15	-	HORMA domain containing 2		GO:0000795(synaptonemal complex)		GO:0051177(meiotic sister chromatid cohesion)
-	ENSGALG00000008040	protein_coding	+	chr15:10907426-10923703	1.02419	0	inf	inf	1	1	up
COQ10B	ENSGALG00000008046	protein_coding	+	chr7:9709226-9719149	13.6624	4.95317	2.7583	1.46378	0.0511	0.994263	up	424057	-	CGNC:52121	7	-	coenzyme Q10B
PAQR5	ENSGALG00000008077	protein_coding	+	chr10:18823403-18826891	1.98715	0	inf	inf	1	1	up	427516	-	CGNC:6115|Ensembl:ENSGALG00000008077	10	-	progestin and adipoQ receptor family member 5
CDHR3	ENSGALG00000008109	protein_coding	+	chr1:13960600-13995845	0.487121	0.170372	2.85916	1.51559	1	1	up	427846	-	CGNC:53209|Ensembl:ENSGALG00000008109	1	-	cadherin related family member 3
PRORSD1P	ENSGALG00000008110	protein_coding	+	chr3:34593-46349	10.4177	2.99823	3.47461	1.79685	0.2867	0.994263	up	421212	PRORSD1	CGNC:51437|Ensembl:ENSGALG00000034854	3	-	prolyl-tRNA synthetase associated domain containing 1, pseudogene			GO:0002161(aminoacyl-tRNA editing activity)	GO:0006450(regulation of translational fidelity)
PLCL1	ENSGALG00000008113	protein_coding	-	chr7:9822435-9943072	0.116117	0	inf	inf	1	1	up	424060	-	CGNC:6148|Ensembl:ENSGALG00000008113	7	-	phospholipase C like 1		GO:0005622(intracellular)//GO:0005886(plasma membrane)	GO:0004871(signal transducer activity)//GO:0070679(inositol 1,4,5 trisphosphate binding)//GO:0004435(phosphatidylinositol phospholipase C activity)//GO:0050811(GABA receptor binding)	GO:0033135(regulation of peptidyl-serine phosphorylation)//GO:0032228(regulation of synaptic transmission, GABAergic)//GO:0016042(lipid catabolic process)//GO:0007214(gamma-aminobutyric acid signaling pathway)//GO:1900122(positive regulation of receptor binding)//GO:0035556(intracellular signal transduction)
UbI	ENSGALG00000008125	protein_coding	+	chr3:30835-32970	194.6	88.4218	2.2008	1.13803	0.00595	0.994263	up	395296	-	CGNC:49249	-	-	polyubiquitin
CHAC2	ENSGALG00000008182	protein_coding	-	chr3:2959484-3021472	5.74492	0	inf	inf	0.1825	0.994263	up	421221	-	CGNC:6207|Ensembl:ENSGALG00000008182	3	-	ChaC cation transport regulator homolog 2			GO:0003839(gamma-glutamylcyclotransferase activity)	GO:0006751(glutathione catabolic process)
NIF3L1	ENSGALG00000008226	protein_coding	+	chr7:10813175-10818087	26.1641	9.60332	2.72448	1.44598	0.0203	0.994263	up	424076	-	CGNC:6232|Ensembl:ENSGALG00000008226	7	-	NGG1 interacting factor 3 like 1		GO:0005739(mitochondrion)//GO:0005634(nucleus)	GO:0008134(transcription factor binding)//GO:0042802(identical protein binding)	GO:0030182(neuron differentiation)//GO:1903507(negative regulation of nucleic acid-templated transcription)//GO:0045893(positive regulation of transcription, DNA-templated)
PPIL3	ENSGALG00000008228	protein_coding	-	chr7:10797045-10812929	2.35597	4.56328e-08	5.16298e+07	25.6217	1	1	up	424075	-	CGNC:6234|Ensembl:ENSGALG00000008228	7	-	peptidylprolyl isomerase like 3		GO:0071013(catalytic step 2 spliceosome)	GO:0003755(peptidyl-prolyl cis-trans isomerase activity)	GO:0000413(protein peptidyl-prolyl isomerization)//GO:0006457(protein folding)
NDUFB3	ENSGALG00000008239	protein_coding	+	chr7:10893770-10897452	63.7391	29.9767	2.12629	1.08834	0.0387	0.994263	up	424078	-	CGNC:6243|Ensembl:ENSGALG00000008239	7	-	NADH:ubiquinone oxidoreductase subunit B3	gga00190(Oxidative phosphorylation)//gga01100(Metabolic pathways)	GO:0070062(extracellular exosome)//GO:0005747(mitochondrial respiratory chain complex I)		GO:0032981(mitochondrial respiratory chain complex I assembly)//GO:0022900(electron transport chain)
AP3S2	ENSGALG00000008291	protein_coding	-	chr10:19265372-19502893	6.79091	3.23047	2.10214	1.07186	0.70635	0.994263	up	415581	-	CGNC:6283|Ensembl:ENSGALG00000008291	10	-	adaptor related protein complex 3 sigma 2 subunit	gga04142(Lysosome)	GO:0030117(membrane coat)	GO:0008565(protein transporter activity)	GO:0016192(vesicle-mediated transport)//GO:0006886(intracellular protein transport)
FAM185A	ENSGALG00000008301	protein_coding	+	chr1:12607529-12647356	3.39342	1.4447	2.34888	1.23197	1	1	up	417722	-	CGNC:50577|Ensembl:ENSGALG00000008301	1	-	family with sequence similarity 185 member A		GO:0005829(cytosol)
RAD18	ENSGALG00000008368	protein_coding	-	chr12:19282100-19316352	3.54217	1.33378	2.65573	1.40911	1	1	up	416114	-	CGNC:6341|Ensembl:ENSGALG00000008368	12	-	RAD18, E3 ubiquitin protein ligase		GO:0042405(nuclear inclusion body)//GO:0035861(site of double-strand break)//GO:0005813(centrosome)//GO:0097505(Rad6-Rad18 complex)//GO:0005657(replication fork)//GO:0005634(nucleus)//GO:0016604(nuclear body)	GO:0043142(single-stranded DNA-dependent ATPase activity)//GO:0031625(ubiquitin protein ligase binding)//GO:0032403(protein complex binding)//GO:0042802(identical protein binding)//GO:0061630(ubiquitin protein ligase activity)//GO:0000403(Y-form DNA binding)//GO:0031593(polyubiquitin modification-dependent protein binding)	GO:0060548(negative regulation of cell death)//GO:0051865(protein autoubiquitination)//GO:0006301(postreplication repair)//GO:0051984(positive regulation of chromosome segregation)//GO:0006513(protein monoubiquitination)//GO:0009411(response to UV)
SEC13	ENSGALG00000008419	protein_coding	-	chr12:19434377-19444446	26.7969	9.51167	2.81727	1.4943	0.0008	0.481231	up	416119	SEC13L1	CGNC:6381|Ensembl:ENSGALG00000008419	12	-	SEC13 homolog, nuclear pore and COPII coat complex component	gga03013(RNA transport)//gga04141(Protein processing in endoplasmic reticulum)
-	ENSGALG00000008453	protein_coding	+	chr5:23499663-23510541	0.708142	0	inf	inf	1	1	up
ARRDC1	ENSGALG00000008475	protein_coding	+	chr17:1955242-1981882	3.2961	1.58931	2.07392	1.05236	1	1	up	427772	-	CGNC:6427|Ensembl:ENSGALG00000008475	17	-	arrestin domain containing 1		GO:0005886(plasma membrane)//GO:0070062(extracellular exosome)//GO:0031410(cytoplasmic vesicle)
METTL21A	ENSGALG00000008493	protein_coding	+	chr7:11679315-11681725	10.9317	4.95232	2.20739	1.14234	0.2058	0.994263	up	424094	FAM119A	CGNC:6441|Ensembl:ENSGALG00000008493	7	-	methyltransferase like 21A
POLR2H	ENSGALG00000008534	protein_coding	-	chr9:15422029-15423981	16.0013	4.66031	3.43352	1.77969	0.05545	0.994263	up	424954	-	CGNC:6474|Ensembl:ENSGALG00000008534	9	-	RNA polymerase II subunit H	gga00230(Purine metabolism)//gga00240(Pyrimidine metabolism)//gga01100(Metabolic pathways)//gga03020(RNA polymerase)//gga04623(Cytosolic DNA-sensing pathway)	GO:0032993(protein-DNA complex)//GO:0005736(DNA-directed RNA polymerase I complex)//GO:0005666(DNA-directed RNA polymerase III complex)//GO:0005665(DNA-directed RNA polymerase II, core complex)	GO:0001054(RNA polymerase I activity)//GO:0003697(single-stranded DNA binding)//GO:0001056(RNA polymerase III activity)//GO:0001055(RNA polymerase II activity)	GO:0006383(transcription from RNA polymerase III promoter)//GO:0006360(transcription from RNA polymerase I promoter)//GO:0006366(transcription from RNA polymerase II promoter)
MDH1B	ENSGALG00000008548	protein_coding	+	chr7:11891290-11900217	0.61873	0	inf	inf	1	1	up	424097	-	CGNC:6485|Ensembl:ENSGALG00000008548	7	-	malate dehydrogenase 1B		GO:0005737(cytoplasm)	GO:0030060(L-malate dehydrogenase activity)	GO:0006734(NADH metabolic process)//GO:0005975(carbohydrate metabolic process)//GO:0006108(malate metabolic process)//GO:0006107(oxaloacetate metabolic process)//GO:0006099(tricarboxylic acid cycle)
DYTN	ENSGALG00000008562	protein_coding	+	chr7:11905255-12015748	1.2143	0	inf	inf	1	1	up	429012	-	CGNC:53536|Ensembl:ENSGALG00000008562	7	-	dystrotelin
ENTPD6	ENSGALG00000008563	protein_coding	+	chr3:15423076-15433610	16.6457	7.06115	2.35737	1.23718	0.0538	0.994263	up	416708	-	CGNC:6498|Ensembl:ENSGALG00000008563	3	-	ectonucleoside triphosphate diphosphohydrolase 6 (putative)	gga00230(Purine metabolism)//gga00240(Pyrimidine metabolism)	GO:0070062(extracellular exosome)//GO:0005794(Golgi apparatus)	GO:0016787(hydrolase activity)
MOV10L1	ENSGALG00000008570	protein_coding	+	chr1:19894578-19925776	0.241043	0	inf	inf	1	1	up	417738	-	CGNC:50583	1	-	Mov10 RISC complex RNA helicase like 1
FAM166A	ENSGALG00000008596	protein_coding	+	chr17:1864288-1873939	1.42759	0.388115	3.67825	1.87902	1	1	up	771210	-	CGNC:56602|Ensembl:ENSGALG00000045172	17	-	family with sequence similarity 166 member A
TTBK1	ENSGALG00000008627	protein_coding	+	chr3:15240348-15316856	3.43385	1.52847	2.24659	1.16774	1	1	up	416713	-	CGNC:6550|Ensembl:ENSGALG00000008627	3	-	tau tubulin kinase 1		GO:0005654(nucleoplasm)//GO:0005634(nucleus)//GO:0005737(cytoplasm)//GO:0005829(cytosol)	GO:0005524(ATP binding)//GO:0004674(protein serine/threonine kinase activity)	GO:0021762(substantia nigra development)//GO:0008360(regulation of cell shape)//GO:0018105(peptidyl-serine phosphorylation)
SLC25A43	ENSGALG00000008682	protein_coding	-	chr4:16526479-16542420	3.4027	1.18938	2.86092	1.51648	1	1	up	422371	-	CGNC:6592|Ensembl:ENSGALG00000008682	4	-	solute carrier family 25 member 43		GO:0005743(mitochondrial inner membrane)//GO:0016021(integral component of membrane)	GO:0022857(transmembrane transporter activity)	GO:0055085(transmembrane transport)//GO:0006839(mitochondrial transport)
SNX5	ENSGALG00000008691	protein_coding	+	chr3:14813792-14830438	3.36841	0.845587	3.98351	1.99404	1	1	up	416718	-	CGNC:50332|Ensembl:ENSGALG00000008691	3	-	sorting nexin 5	gga04144(Endocytosis)	GO:0005768(endosome)//GO:0031313(extrinsic component of endosome membrane)//GO:0030904(retromer complex)//GO:0005829(cytosol)//GO:0019898(extrinsic component of membrane)//GO:0031901(early endosome membrane)//GO:0097422(tubular endosome)//GO:0070685(macropinocytic cup)//GO:0031234(extrinsic component of cytoplasmic side of plasma membrane)	GO:0045296(cadherin binding)//GO:0035091(phosphatidylinositol binding)//GO:0034452(dynactin binding)	GO:0006897(endocytosis)//GO:0016050(vesicle organization)//GO:0006907(pinocytosis)//GO:0006886(intracellular protein transport)//GO:0042147(retrograde transport, endosome to Golgi)
PTER	ENSGALG00000008728	protein_coding	-	chr2:20004929-20020105	0.639722	0.261021	2.45085	1.29328	1	1	up	420525	-	CGNC:6624|Ensembl:ENSGALG00000008728	2	-	phosphotriesterase related			GO:0016788(hydrolase activity, acting on ester bonds)//GO:0008270(zinc ion binding)	GO:0009056(catabolic process)
-	ENSGALG00000008752	protein_coding	+	chr5:24431805-24434906	0.71186	0.290349	2.45175	1.29381	1	1	up
-	ENSGALG00000008755	protein_coding	-	chr1:21832702-21860511	6.57743	1.91593	3.43302	1.77948	0.1552	0.994263	up
WDR92	ENSGALG00000008760	protein_coding	-	chr3:11131167-11137396	6.71194	2.15739	3.11113	1.63744	0.05605	0.994263	up	769534	-	CGNC:6651|Ensembl:ENSGALG00000008760	3	-	WD repeat domain 92			GO:0043130(ubiquitin binding)
-	ENSGALG00000008822	protein_coding	-	chr17:1527857-1529074	1.09366	0	inf	inf	1	1	up
SAMD13	ENSGALG00000008835	protein_coding	-	chr8:15564993-15576789	0.628107	0.205019	3.06365	1.61525	1	1	up	424541	THAP10	CGNC:52215|Ensembl:ENSGALG00000008835	8	-	sterile alpha motif domain containing 13
HAO1	ENSGALG00000008845	protein_coding	+	chr3:13999211-14027688	0.824831	0.384622	2.14453	1.10066	1	1	up	416728	-	CGNC:6714|Ensembl:ENSGALG00000008845	3	-	hydroxyacid oxidase 1	gga00630(Glyoxylate and dicarboxylate metabolism)//gga01100(Metabolic pathways)//gga01200(Carbon metabolism)//gga04146(Peroxisome)	GO:0005777(peroxisome)	GO:0005102(receptor binding)//GO:0010181(FMN binding)//GO:0008891(glycolate oxidase activity)	GO:0046296(glycolate catabolic process)//GO:0001561(fatty acid alpha-oxidation)
RNF208	ENSGALG00000008911	protein_coding	-	chr17:974721-975519	3.34087	1.08962	3.06609	1.6164	1	1	up	417279	-	CGNC:50473|Ensembl:ENSGALG00000008911	17	-	ring finger protein 208		GO:0005654(nucleoplasm)//GO:0005829(cytosol)	GO:0004842(ubiquitin-protein transferase activity)	GO:0051865(protein autoubiquitination)
NRAP	ENSGALG00000008914	protein_coding	-	chr6:26971703-27037248	0.144083	0.0587921	2.45073	1.29321	1	1	up	423899	-	CGNC:52077|Ensembl:ENSGALG00000008914	6	-	nebulin-related anchoring protein		GO:0005916(fascia adherens)//GO:0030016(myofibril)//GO:0005927(muscle tendon junction)	GO:0017166(vinculin binding)//GO:0046872(metal ion binding)//GO:0003779(actin binding)//GO:0051371(muscle alpha-actinin binding)
COMMD1	ENSGALG00000008931	protein_coding	+	chr3:8869799-8936431	9.24868	3.7691	2.45382	1.29503	0.2939	0.994263	up	769006	-	CGNC:6782|Ensembl:ENSGALG00000008931	3	-	copper metabolism domain containing 1
-	ENSGALG00000008936	protein_coding	+	chr17:927030-933004	2.46247	1.13026	2.17869	1.12346	1	1	up
ADRB1	ENSGALG00000008949	protein_coding	+	chr6:27189840-27191250	0.790747	0	inf	inf	1	1	up	101750705	-	CGNC:53529	6	-	adrenoceptor beta 1	gga04020(Calcium signaling pathway)//gga04080(Neuroactive ligand-receptor interaction)//gga04144(Endocytosis)//gga04261(Adrenergic signaling in cardiomyocytes)//gga04540(Gap junction)
FAM73A	ENSGALG00000008951	protein_coding	-	chr8:17845818-17879351	8.302	3.69456	2.24709	1.16806	0.1045	0.994263	up
TRMT61B	ENSGALG00000008979	protein_coding	+	chr3:8512198-8522900	6.17781	2.15952	2.86072	1.51638	0.20735	0.994263	up	101748994	-	CGNC:68471|Ensembl:ENSGALG00000008979	3	-	tRNA methyltransferase 61B		GO:0005739(mitochondrion)//GO:0031515(tRNA (m1A) methyltransferase complex)//GO:0005634(nucleus)	GO:0016433(rRNA (adenine) methyltransferase activity)//GO:0016429(tRNA (adenine-N1-)-methyltransferase activity)	GO:0051260(protein homooligomerization)//GO:0031167(rRNA methylation)//GO:0070901(mitochondrial tRNA methylation)
PIF1	ENSGALG00000009032	protein_coding	-	chr8:18504654-18513032	0.298985	0.121985	2.451	1.29337	1	1	up	429092	-	CGNC:6867	8	-	PIF1 5'-to-3' DNA helicase
ALK	ENSGALG00000009034	protein_coding	+	chr3:8094159-8408079	0.996215	0.243889	4.0847	2.03023	1	1	up	421297	-	CGNC:6869	3	-	anaplastic lymphoma receptor tyrosine kinase
TMEM141	ENSGALG00000009054	protein_coding	-	chr17:411602-413332	3.66609	1.19558	3.06637	1.61653	0.3685	0.994263	up	417294	-	CGNC:741|Ensembl:ENSGALG00000041390	17	-	transmembrane protein 141
-	ENSGALG00000009055	protein_coding	-	chr3:7911355-7966647	2.60309	0	inf	inf	1	1	up
CORTBP2	ENSGALG00000009134	protein_coding	+	chr1:24245070-24320202	0.567406	0.264598	2.14441	1.10058	1	1	up
CRDS2	ENSGALG00000009185	protein_coding	+	chr5:25256090-25334013	3.08897	0.193866	15.9336	3.994	1	1	up
SLITRK2	ENSGALG00000009192	protein_coding	-	chr4:19131950-19134524	5.96944	1.94835	3.06384	1.61534	0.04385	0.994263	up	100857927	-	CGNC:65137	4	-	SLIT and NTRK like family member 2
-	ENSGALG00000009227	protein_coding	-	chrW:156235-223268	13.8562	2.97288	4.66087	2.2206	0.09325	0.994263	up
LRAT	ENSGALG00000009276	protein_coding	+	chr4:19868513-19870899	0.674238	0	inf	inf	1	1	up	422403	-	CGNC:7048|Ensembl:ENSGALG00000009276	4	-	lecithin retinol acyltransferase (phosphatidylcholine--retinol O-acyltransferase)	gga00830(Retinol metabolism)	GO:0005623(cell)//GO:0016021(integral component of membrane)	GO:0008374(O-acyltransferase activity)	GO:0042572(retinol metabolic process)//GO:0006776(vitamin A metabolic process)//GO:0032370(positive regulation of lipid transport)//GO:1990830(cellular response to leukemia inhibitory factor)
-	ENSGALG00000009292	protein_coding	-	chr5:25464270-25468294	0.671324	0	inf	inf	1	1	up
RPL22L1	ENSGALG00000009312	protein_coding	+	chr9:19191687-19193717	25.9901	12.8901	2.01627	1.01169	0.19255	0.994263	up	100858296	-	CGNC:64783|Ensembl:ENSGALG00000009312	9	-	ribosomal protein L22 like 1	gga03010(Ribosome)	GO:0005840(ribosome)	GO:0003735(structural constituent of ribosome)	GO:0006412(translation)
HN1L	ENSGALG00000009346	protein_coding	-	chr14:13686796-13691868	23.1118	10.6031	2.17973	1.12415	0.064	0.994263	up
CLDN11	ENSGALG00000009355	protein_coding	-	chr9:19248958-19256591	1.1777	0	inf	inf	1	1	up	424990	-	CGNC:7112|Ensembl:ENSGALG00000009355	9	-	claudin 11	gga04514(Cell adhesion molecules (CAMs))//gga04530(Tight junction)	GO:0005923(bicellular tight junction)//GO:0005886(plasma membrane)//GO:0043209(myelin sheath)//GO:0016021(integral component of membrane)//GO:0045178(basal part of cell)//GO:0070062(extracellular exosome)	GO:0005198(structural molecule activity)	GO:0008366(axon ensheathment)//GO:0007155(cell adhesion)//GO:0007283(spermatogenesis)
PHC3	ENSGALG00000009372	protein_coding	+	chr9:19303969-19329980	0.13484	0	inf	inf	1	1	up	429159	-	CGNC:7126|Ensembl:ENSGALG00000009372	9	-	polyhomeotic homolog 3		GO:0005634(nucleus)	GO:0008270(zinc ion binding)
-	ENSGALG00000009387	protein_coding	+	chr5:26765466-26816464	0.368174	0	inf	inf	1	1	up
SMOC1	ENSGALG00000009415	protein_coding	-	chr5:26991939-27112082	8.0524	3.46806	2.32187	1.21529	0.03055	0.994263	up	768688	-	CGNC:7159|Ensembl:ENSGALG00000009415	5	-	SPARC related modular calcium binding 1		GO:0005578(proteinaceous extracellular matrix)	GO:0005509(calcium ion binding)	GO:0001654(eye development)//GO:0060173(limb development)//GO:0045667(regulation of osteoblast differentiation)//GO:0007165(signal transduction)
GPR85	ENSGALG00000009439	protein_coding	+	chr1:26616353-26617466	0.440317	0	inf	inf	1	1	up	417775	-	CGNC:7176|Ensembl:ENSGALG00000009439	1	-	G protein-coupled receptor 85		GO:0005783(endoplasmic reticulum)//GO:0005886(plasma membrane)//GO:0016021(integral component of membrane)	GO:0004930(G-protein coupled receptor activity)	GO:0007186(G-protein coupled receptor signaling pathway)
LSMEM1	ENSGALG00000009446	protein_coding	-	chr1:26846391-26853187	2.05171	0	inf	inf	1	1	up	417778	C1H7orf53|C7ORF53	CGNC:7183|Ensembl:ENSGALG00000009446	1	-	leucine rich single-pass membrane protein 1		GO:0016021(integral component of membrane)//GO:0005829(cytosol)
EFCAB1	ENSGALG00000009473	protein_coding	-	chr2:22801430-22810072	0.611882	0	inf	inf	1	1	up	420556	-	CGNC:7202|Ensembl:ENSGALG00000009473	2	-	EF-hand calcium binding domain 1			GO:0005509(calcium ion binding)
TMA16	ENSGALG00000009501	protein_coding	+	chr4:22863300-22880615	32.1626	14.8219	2.16995	1.11766	0.08135	0.994263	up	770087	C4H4ORF43|C4orf43	CGNC:55763|Ensembl:ENSGALG00000009501	4	-	translation machinery associated 16 homolog		GO:0005730(nucleolus)//GO:0005634(nucleus)//GO:0005840(ribosome)
MARCH1	ENSGALG00000009520	protein_coding	-	chr4:22888997-22922172	1.48247	0	inf	inf	1	1	up	422420	Mar-01	CGNC:7247|Ensembl:ENSGALG00000009520	4	-	membrane associated ring-CH-type finger 1		GO:0016021(integral component of membrane)	GO:0008270(zinc ion binding)
ARL14	ENSGALG00000009542	protein_coding	+	chr9:21572454-21573027	1.05956	0	inf	inf	1	1	up	101749876	-	CGNC:69335|Ensembl:ENSGALG00000043623	9	-	ADP ribosylation factor like GTPase 14
DCAF17	ENSGALG00000009558	protein_coding	-	chr7:17519609-17538308	2.4456	1.164	2.10102	1.07109	1	1	up	424153	C2orf37	CGNC:7275|Ensembl:ENSGALG00000037327	7	-	DDB1 and CUL4 associated factor 17				GO:0016567(protein ubiquitination)
SPATA17	ENSGALG00000009616	protein_coding	-	chr3:18989501-19078953	0.400829	0	inf	inf	1	1	up	421354	-	CGNC:7321	3	-	spermatogenesis associated 17
GPR176	ENSGALG00000009619	protein_coding	+	chr5:28815673-28818652	4.4836	0.243852	18.3866	4.20058	0.2507	0.994263	up	428879	-	CGNC:7322|Ensembl:ENSGALG00000009619	5	-	G protein-coupled receptor 176		GO:0005886(plasma membrane)//GO:0016021(integral component of membrane)	GO:0004930(G-protein coupled receptor activity)	GO:0030818(negative regulation of cAMP biosynthetic process)//GO:0007186(G-protein coupled receptor signaling pathway)//GO:0048512(circadian behavior)
FSIP1	ENSGALG00000009624	protein_coding	+	chr5:28825775-28897131	0.121931	0	inf	inf	1	1	up	423286	-	CGNC:7327|Ensembl:ENSGALG00000009624	5	-	fibrous sheath interacting protein 1
-	ENSGALG00000009709	protein_coding	+	chr28:3057051-3063738	4.92849	2.15435	2.28769	1.19389	0.12645	0.994263	up
CBR4	ENSGALG00000009714	protein_coding	+	chr4:25012881-25021145	2.38383	0	inf	inf	1	1	up	422435	-	CGNC:7388|Ensembl:ENSGALG00000009714	4	-	carbonyl reductase 4		GO:1990204(oxidoreductase complex)//GO:0005759(mitochondrial matrix)	GO:0003955(NAD(P)H dehydrogenase (quinone) activity)//GO:0008753(NADPH dehydrogenase (quinone) activity)//GO:0048038(quinone binding)//GO:0070402(NADPH binding)//GO:0047025(3-oxoacyl-[acyl-carrier-protein] reductase (NADH) activity)	GO:0055114(oxidation-reduction process)//GO:0051290(protein heterotetramerization)//GO:0051289(protein homotetramerization)//GO:0044597(daunorubicin metabolic process)//GO:0044598(doxorubicin metabolic process)//GO:0006633(fatty acid biosynthetic process)
ARSA	ENSGALG00000009746	protein_coding	-	chr1:115340-120079	16.429	7.74055	2.12246	1.08574	0.0438	0.994263	up	426863	-	CGNC:7409|Ensembl:ENSGALG00000035824	1	-	arylsulfatase A	gga00600(Sphingolipid metabolism)//gga04142(Lysosome)		GO:0008484(sulfuric ester hydrolase activity)	GO:0008152(metabolic process)
TATDN3	ENSGALG00000009811	protein_coding	-	chr3:21132318-21152781	2.88576	0.470656	6.13133	2.6162	1	1	up	421366	-	CGNC:7453|Ensembl:ENSGALG00000009811	3	-	TatD DNase domain containing 3
TMEM5	ENSGALG00000009815	protein_coding	+	chr1:33355624-33367245	0.627111	0.170558	3.67682	1.87846	1	1	up	417820	-	CGNC:7456|Ensembl:ENSGALG00000009815	1	-	transmembrane protein 5		GO:0005654(nucleoplasm)//GO:0005794(Golgi apparatus)	GO:0120053(ribitol beta-1,4-xylosyltransferase activity)	GO:0035269(protein O-linked mannosylation)
MGAT4D	ENSGALG00000009830	protein_coding	-	chr4:29125099-29158609	0.424747	0	inf	inf	1	1	up	422448	-	CGNC:51741|Ensembl:ENSGALG00000009830	4	-	MGAT4 family member D	gga00510(N-Glycan biosynthesis)//gga01100(Metabolic pathways)
TBC1D30	ENSGALG00000009859	protein_coding	+	chr1:33753624-33804505	0.150955	0.0615957	2.45073	1.29321	1	1	up	417830	-	CGNC:50603|Ensembl:ENSGALG00000009859	1	-	TBC1 domain family member 30
-	ENSGALG00000009863	protein_coding	-	chr3:21600962-21605202	20.7464	7.80588	2.65778	1.41022	0.0935	0.994263	up
RNF150	ENSGALG00000009865	protein_coding	-	chr4:29246318-29359420	0.960271	0.344951	2.78379	1.47705	1	1	up	100858072	-	CGNC:66073|Ensembl:ENSGALG00000009865	4	-	ring finger protein 150		GO:0016021(integral component of membrane)
WIF1	ENSGALG00000009867	protein_coding	-	chr1:33841538-33883296	0.694185	0	inf	inf	1	1	up	417831	-	CGNC:7497|Ensembl:ENSGALG00000039209	1	-	WNT inhibitory factor 1	gga04310(Wnt signaling pathway)
HMGI-C	ENSGALG00000009875	protein_coding	+	chr1:34166920-34174234	165.295	65.3999	2.52745	1.33768	0.4586	0.994263	up
CFAP57	ENSGALG00000009902	protein_coding	+	chr8:18515255-18543111	0.165783	0	inf	inf	1	1	up	424559	WDR65	CGNC:7520	8	-	cilia and flagella associated protein 57
PRPH2	ENSGALG00000009909	protein_coding	-	chr3:22380706-22390223	0.654001	0	inf	inf	1	1	up	395899	CRDS1|RDS|peripherin-2	CGNC:49540|Ensembl:ENSGALG00000009909	3	-	peripherin 2		GO:0005887(integral component of plasma membrane)//GO:0001750(photoreceptor outer segment)		GO:0007601(visual perception)//GO:0060041(retina development in camera-type eye)//GO:0007155(cell adhesion)//GO:0007166(cell surface receptor signaling pathway)
AP4S1	ENSGALG00000009936	protein_coding	+	chr5:33603693-33613992	0.89243	0	inf	inf	1	1	up	423309	-	CGNC:7548	5	-	adaptor related protein complex 4 sigma 1 subunit	gga04142(Lysosome)
LSM6	ENSGALG00000009985	protein_coding	+	chr4:30814069-30819037	14.3034	6.41398	2.23003	1.15706	0.18575	0.994263	up	422466	-	CGNC:7590|Ensembl:ENSGALG00000009985	4	-	LSM6 homolog, U6 small nuclear RNA and mRNA degradation associated	gga03018(RNA degradation)//gga03040(Spliceosome)	GO:0005732(small nucleolar ribonucleoprotein complex)//GO:0005681(spliceosomal complex)	GO:0003723(RNA binding)	GO:0000398(mRNA splicing, via spliceosome)
EPAS1	ENSGALG00000010005	protein_coding	+	chr3:25951103-25982708	0.168926	0	inf	inf	1	1	up	395596	HIF2a	CGNC:49393|Ensembl:ENSGALG00000010005	3	-	endothelial PAS domain protein 1		GO:0005667(transcription factor complex)//GO:0005634(nucleus)//GO:0005737(cytoplasm)	GO:0046983(protein dimerization activity)//GO:0003700(transcription factor activity, sequence-specific DNA binding)	GO:0006351(transcription, DNA-templated)//GO:0006355(regulation of transcription, DNA-templated)
LRFN2	ENSGALG00000010050	protein_coding	+	chr3:27585424-27734936	0.252014	0	inf	inf	1	1	up	428571	-	CGNC:7641	3	-	leucine rich repeat and fibronectin type III domain containing 2
SLC25A21	ENSGALG00000010117	protein_coding	-	chr5:36015952-36247167	2.92309	0.953479	3.06571	1.61622	1	1	up	423330	-	CGNC:7688|Ensembl:ENSGALG00000010117	5	-	solute carrier family 25 member 21		GO:0005743(mitochondrial inner membrane)//GO:0016021(integral component of membrane)	GO:0005310(dicarboxylic acid transmembrane transporter activity)	GO:0006835(dicarboxylic acid transport)//GO:0006839(mitochondrial transport)
MIPOL1	ENSGALG00000010118	protein_coding	+	chr5:36277201-36335031	9.13179	4.13753	2.20707	1.14213	0.2058	0.994263	up	423331	-	CGNC:7689|Ensembl:ENSGALG00000010118	5	-	mirror-image polydactyly 1
CDKL2	ENSGALG00000010119	protein_coding	-	chr4:33473905-33509289	0.106092	0	inf	inf	1	1	up	428736	-	CGNC:7690|Ensembl:ENSGALG00000010119	4	-	cyclin dependent kinase like 2			GO:0004672(protein kinase activity)//GO:0005524(ATP binding)	GO:0006468(protein phosphorylation)
PTPRR	ENSGALG00000010148	protein_coding	-	chr1:35865661-36009723	0.121421	0	inf	inf	1	1	up	771985	-	CGNC:7713	1	-	protein tyrosine phosphatase, receptor type R	gga04010(MAPK signaling pathway)
CYP21A2	ENSGALG00000010153	protein_coding	-	chr16:37923-41746	4.8931	0.570223	8.58103	3.10115	0.1934	0.994263	up
ALDH6A1	ENSGALG00000010211	protein_coding	-	chr5:37016492-37064969	10.2557	4.64827	2.20633	1.14165	0.0908	0.994263	up	423345	-	CGNC:7766|Ensembl:ENSGALG00000010211	5	-	aldehyde dehydrogenase 6 family member A1	gga00280(Valine, leucine and isoleucine degradation)//gga00410(beta-Alanine metabolism)//gga00562(Inositol phosphate metabolism)//gga00640(Propanoate metabolism)//gga01100(Metabolic pathways)//gga01200(Carbon metabolism)	GO:0005654(nucleoplasm)//GO:0005739(mitochondrion)//GO:0070062(extracellular exosome)	GO:0003723(RNA binding)//GO:0004491(methylmalonate-semialdehyde dehydrogenase (acylating) activity)	GO:0006210(thymine catabolic process)//GO:0055114(oxidation-reduction process)//GO:0006574(valine catabolic process)
-	ENSGALG00000010218	protein_coding	-	chr9:22260384-22268315	9.76517	0.884857	11.0359	3.46413	0.19165	0.994263	up
-	ENSGALG00000010225	protein_coding	+	chr5:37126032-37148405	0.144809	0	inf	inf	1	1	up
COL28A1	ENSGALG00000010259	protein_coding	-	chr2:24839285-24897492	0.124965	0	inf	inf	1	1	up	420576	-	CGNC:7806|Ensembl:ENSGALG00000010259	2	-	collagen type XXVIII alpha 1 chain		GO:0005604(basement membrane)	GO:0004867(serine-type endopeptidase inhibitor activity)	GO:0010951(negative regulation of endopeptidase activity)
PARM1	ENSGALG00000010268	protein_coding	-	chr4:34053976-34056448	32.3349	16.0733	2.01171	1.00842	0.10595	0.994263	up	422503	-	CGNC:51758	4	-	prostate androgen-regulated mucin-like protein 1
Rd	ENSGALG00000010293	protein_coding	-	chr8:20142536-20153680	3.17502	0	inf	inf	1	1	up
-	ENSGALG00000010303	protein_coding	+	chr3:30203970-30214506	0.587452	0.239628	2.45153	1.29368	1	1	up
LRRC74A	ENSGALG00000010378	protein_coding	+	chr5:38177273-38198402	0.141484	0	inf	inf	1	1	up	428893	C5H14ORF166B|LRRC74	CGNC:53505|Ensembl:ENSGALG00000010378	5	-	leucine rich repeat containing 74A			GO:0005509(calcium ion binding)
MMRN1	ENSGALG00000010391	protein_coding	+	chr4:34906758-34949844	0.181181	0	inf	inf	1	1	up	428741	-	CGNC:7911|Ensembl:ENSGALG00000010391	4	-	multimerin 1		GO:0031012(extracellular matrix)		GO:0007596(blood coagulation)
GSTZ1	ENSGALG00000010432	protein_coding	+	chr5:38457066-38464944	1.72168	0.468002	3.67879	1.87923	1	1	up	423374	-	CGNC:7940|Ensembl:ENSGALG00000010432	5	-	glutathione S-transferase zeta 1	gga00350(Tyrosine metabolism)//gga01100(Metabolic pathways)	GO:0005737(cytoplasm)	GO:0003824(catalytic activity)	GO:0009072(aromatic amino acid family metabolic process)
TTC39A	ENSGALG00000010540	protein_coding	-	chr8:22914257-22948105	0.118244	0	inf	inf	1	1	up	424632	C1orf34	CGNC:8005|Ensembl:ENSGALG00000010540	8	-	tetratricopeptide repeat domain 39A
SULT6B1	ENSGALG00000010599	protein_coding	-	chr3:32847236-32854255	1.12385	0	inf	inf	1	1	up	421473	-	CGNC:8049|Ensembl:ENSGALG00000046375	3	-	sulfotransferase family, cytosolic, 6B, member 1			GO:0008146(sulfotransferase activity)
QPCT	ENSGALG00000010617	protein_coding	+	chr3:32927167-32942177	3.50338	1.27047	2.75756	1.46339	1	1	up	421479	-	CGNC:8061|Ensembl:ENSGALG00000032440	3	-	glutaminyl-peptide cyclotransferase
SLC1A7	ENSGALG00000010673	protein_coding	-	chr8:23488766-23531343	1.6143	0.219504	7.35431	2.87859	1	1	up	429106	-	CGNC:8109|Ensembl:ENSGALG00000010673	8	-	solute carrier family 1 member 7
C1orf101	ENSGALG00000010691	protein_coding	-	chr3:34077462-34104237	0.642842	0	inf	inf	1	1	up
SEMA4D	ENSGALG00000010697	protein_coding	-	chrZ:43446315-43483379	4.62239	1.88591	2.45102	1.29338	0.10035	0.994263	up	396331	COLL-4|semaphorin-4D	CGNC:8127|Ensembl:ENSGALG00000010697	Z	-	semaphorin 4D		GO:0005886(plasma membrane)//GO:0005887(integral component of plasma membrane)//GO:0005615(extracellular space)	GO:0038191(neuropilin binding)//GO:0030215(semaphorin receptor binding)//GO:0004888(transmembrane signaling receptor activity)	GO:0048672(positive regulation of collateral sprouting)//GO:0008360(regulation of cell shape)//GO:0007162(negative regulation of cell adhesion)//GO:0048814(regulation of dendrite morphogenesis)//GO:0050732(negative regulation of peptidyl-tyrosine phosphorylation)//GO:1900220(semaphorin-plexin signaling pathway involved in bone trabecula morphogenesis)//GO:0045668(negative regulation of osteoblast…
SAP30	ENSGALG00000010750	protein_coding	+	chr4:42754694-42760373	20.6687	5.3185	3.8862	1.95836	0.12235	0.994263	up	422562	-	CGNC:8174|Ensembl:ENSGALG00000036252	4	-	Sin3A associated protein 30
-	ENSGALG00000010758	protein_coding	-	chr8:24054756-24063868	5.75067	2.24391	2.56278	1.35771	0.12535	0.994263	up
ISPD	ENSGALG00000010795	protein_coding	-	chr2:28433399-28521941	2.56855	1.17379	2.18824	1.12977	1	1	up	420591	-	CGNC:51294|Ensembl:ENSGALG00000010795	2	-	isoprenoid synthase domain containing		GO:0005829(cytosol)	GO:0047349(D-ribitol-5-phosphate cytidylyltransferase activity)//GO:0042803(protein homodimerization activity)	GO:0035269(protein O-linked mannosylation)//GO:0008299(isoprenoid biosynthetic process)//GO:0007411(axon guidance)
PRKG2	ENSGALG00000010909	protein_coding	+	chr4:45032979-45054431	0.589947	0.120348	4.902	2.29337	1	1	up	428753	-	CGNC:8290|Ensembl:ENSGALG00000010909	4	-	protein kinase, cGMP-dependent, type II	gga04540(Gap junction)		GO:0004692(cGMP-dependent protein kinase activity)//GO:0005524(ATP binding)//GO:0030553(cGMP binding)	GO:0006468(protein phosphorylation)
-	ENSGALG00000010911	protein_coding	-	chr8:25600089-25608818	0.703389	0.191296	3.67695	1.87851	1	1	up
SPARCL1	ENSGALG00000010929	protein_coding	+	chr4:45106287-45113208	0.219648	0	inf	inf	1	1	up	422586	-	CGNC:8304|Ensembl:ENSGALG00000010929	4	-	SPARC like 1		GO:0005578(proteinaceous extracellular matrix)//GO:0070062(extracellular exosome)//GO:0005615(extracellular space)	GO:0005518(collagen binding)//GO:0050840(extracellular matrix binding)//GO:0005509(calcium ion binding)	GO:0048856(anatomical structure development)//GO:0007165(signal transduction)
NUPL2	ENSGALG00000010942	protein_coding	+	chr2:31110176-31116556	6.08207	1.92949	3.15216	1.65634	0.12625	0.994263	up	420614	-	CGNC:51302|Ensembl:ENSGALG00000010942	2	-	nucleoporin like 2	gga03013(RNA transport)	GO:0031965(nuclear membrane)//GO:0005634(nucleus)//GO:0005643(nuclear pore)	GO:0005049(nuclear export signal receptor activity)//GO:0046872(metal ion binding)	GO:0051028(mRNA transport)//GO:0006611(protein export from nucleus)
GPNMB	ENSGALG00000010949	protein_coding	+	chr2:31263757-31275529	3.20949	1.30923	2.45142	1.29362	1	1	up	428431	-	CGNC:8320|Ensembl:ENSGALG00000010949	2	-	glycoprotein nmb		GO:0005887(integral component of plasma membrane)//GO:0031410(cytoplasmic vesicle)	GO:0045545(syndecan binding)//GO:0008201(heparin binding)//GO:0005178(integrin binding)//GO:0048018(receptor agonist activity)	GO:2000134(negative regulation of G1/S transition of mitotic cell cycle)//GO:0007267(cell-cell signaling)//GO:0031954(positive regulation of protein autophosphorylation)//GO:0007155(cell adhesion)//GO:1901215(negative regulation of neuron death)//GO:0032720(negative regulation of tumor necrosis factor production)//GO:0034103(regulation of tissue remodeling)//GO:0042130(negative regulation of T ce…
MALSU1	ENSGALG00000010954	protein_coding	+	chr2:31277637-31281731	5.53663	0	inf	inf	0.0056	0.994263	up	420616	C2H7ORF30|C7orf30|mtRsfA	CGNC:8324	2	-	mitochondrial assembly of ribosomal large subunit 1
-	ENSGALG00000010963	protein_coding	+	chr4:45120868-45127901	0.303365	0	inf	inf	1	1	up
HOXA2	ENSGALG00000011053	protein_coding	-	chr2:32797561-33229071	1.29981	0.353392	3.6781	1.87896	1	1	up	396055	-	CGNC:49629|Ensembl:ENSGALG00000040521	2	-	homeobox A2		GO:0005634(nucleus)	GO:0000978(RNA polymerase II core promoter proximal region sequence-specific DNA binding)//GO:0001078(transcriptional repressor activity, RNA polymerase II core promoter proximal region sequence-specific binding)	GO:0048703(embryonic viscerocranium morphogenesis)//GO:0000122(negative regulation of transcription from RNA polymerase II promoter)//GO:0001709(cell fate determination)//GO:0021568(rhombomere 2 development)//GO:0035284(brain segmentation)//GO:0006351(transcription, DNA-templated)//GO:0045665(negative regulation of neuron differentiation)//GO:0002076(osteoblast development)//GO:0009953(dorsal/ven…
HOXA7	ENSGALG00000011061	protein_coding	-	chr2:32797561-33229071	0.674826	0	inf	inf	1	1	up	395290	HOXA-7	CGNC:8400|Ensembl:ENSGALG00000026989	2	-	homeobox A7		GO:0031965(nuclear membrane)//GO:0005654(nucleoplasm)	GO:0001077(transcriptional activator activity, RNA polymerase II core promoter proximal region sequence-specific binding)//GO:0000978(RNA polymerase II core promoter proximal region sequence-specific DNA binding)//GO:0008134(transcription factor binding)	GO:0045617(negative regulation of keratinocyte differentiation)//GO:0001953(negative regulation of cell-matrix adhesion)//GO:0048863(stem cell differentiation)//GO:0009952(anterior/posterior pattern specification)//GO:0006366(transcription from RNA polymerase II promoter)//GO:0045944(positive regulation of transcription from RNA polymerase II promoter)//GO:0000122(negative regulation of transcrip…
COBLL1	ENSGALG00000011068	protein_coding	+	chr7:19544323-19617293	0.123824	0	inf	inf	1	1	up	424182	-	CGNC:8403|Ensembl:ENSGALG00000011068	7	-	cordon-bleu WH2 repeat protein like 1
DPP4	ENSGALG00000011110	protein_coding	+	chr7:20637421-20676092	0.271448	0.110752	2.45095	1.29334	1	1	up	424187	-	CGNC:8435|Ensembl:ENSGALG00000042452	7	-	dipeptidyl peptidase 4		GO:0016021(integral component of membrane)	GO:0004252(serine-type endopeptidase activity)	GO:0006508(proteolysis)
ARV1	ENSGALG00000011155	protein_coding	+	chr3:39916196-39925126	11.4177	5.21076	2.19118	1.13171	0.04885	0.994263	up	421546	-	CGNC:8472|Ensembl:ENSGALG00000011155	3	-	ARV1 homolog, fatty acid homeostasis modulator
TRIM67	ENSGALG00000011157	protein_coding	+	chr3:39969772-40001972	0.493087	0	inf	inf	1	1	up	100857188	-	CGNC:66061	3	-	tripartite motif containing 67
C12orf50	ENSGALG00000011159	protein_coding	-	chr1:42664997-42677602	5.04434	2.17867	2.31533	1.21122	0.2147	0.994263	up
ENOPH1	ENSGALG00000011178	protein_coding	-	chr4:45816658-45820438	14.5735	7.26451	2.00612	1.00441	0.12585	0.994263	up	422600	-	CGNC:8491|Ensembl:ENSGALG00000011178	4	-	enolase-phosphatase 1	gga00270(Cysteine and methionine metabolism)//gga01100(Metabolic pathways)	GO:0005634(nucleus)//GO:0005737(cytoplasm)//GO:0070062(extracellular exosome)	GO:0043874(acireductone synthase activity)//GO:0000287(magnesium ion binding)//GO:0043715(2,3-diketo-5-methylthiopentyl-1-phosphate enolase activity)//GO:0043716(2-hydroxy-3-keto-5-methylthiopentenyl-1-phosphate phosphatase activity)	GO:0019284(L-methionine salvage from S-adenosylmethionine)//GO:0019509(L-methionine salvage from methylthioadenosine)//GO:0016311(dephosphorylation)
ERMARD	ENSGALG00000011186	protein_coding	-	chr3:40444072-40461229	2.31798	1.1514	2.01319	1.00948	1	1	up	421553	C3H6ORF70|C6orf70|PVNH6|dJ266L20.3	CGNC:8497|Ensembl:ENSGALG00000011186	3	-	ER membrane associated RNA degradation		GO:0016021(integral component of membrane)
KITLG	ENSGALG00000011206	protein_coding	-	chr1:42864375-42916342	0.938758	0	inf	inf	1	1	up	396028	-	CGNC:8510|Ensembl:ENSGALG00000011206	1	-	KIT ligand	gga04060(Cytokine-cytokine receptor interaction)//gga04916(Melanogenesis)	GO:0016021(integral component of membrane)//GO:0030027(lamellipodium)//GO:0030175(filopodium)//GO:0005886(plasma membrane)//GO:0005856(cytoskeleton)//GO:0005615(extracellular space)//GO:0005737(cytoplasm)	GO:0008083(growth factor activity)//GO:0005173(stem cell factor receptor binding)//GO:0005125(cytokine activity)	GO:0035162(embryonic hemopoiesis)//GO:0045636(positive regulation of melanocyte differentiation)//GO:0008584(male gonad development)//GO:0043406(positive regulation of MAP kinase activity)//GO:0070668(positive regulation of mast cell proliferation)//GO:0002687(positive regulation of leukocyte migration)//GO:0007155(cell adhesion)//GO:0002763(positive regulation of myeloid leukocyte differentiatio…
DEGS2	ENSGALG00000011213	protein_coding	-	chr5:48382975-48397523	0.382005	0	inf	inf	1	1	up	423454	-	CGNC:8517|Ensembl:ENSGALG00000011213	5	-	delta 4-desaturase, sphingolipid 2	gga00600(Sphingolipid metabolism)//gga01100(Metabolic pathways)	GO:0016021(integral component of membrane)	GO:0042284(sphingolipid delta-4 desaturase activity)//GO:0000170(sphingosine hydroxylase activity)	GO:0055114(oxidation-reduction process)//GO:0006667(sphinganine metabolic process)//GO:0046513(ceramide biosynthetic process)
IL12RB2	ENSGALG00000011222	protein_coding	+	chr8:27549757-27564574	0.490088	0	inf	inf	1	1	up	424705	-	CGNC:8524|Ensembl:ENSGALG00000011222	8	-	interleukin 12 receptor subunit beta 2	gga04060(Cytokine-cytokine receptor interaction)//gga04630(Jak-STAT signaling pathway)	GO:0009897(external side of plasma membrane)	GO:0019901(protein kinase binding)//GO:0004896(cytokine receptor activity)	GO:0018108(peptidyl-tyrosine phosphorylation)//GO:0032609(interferon-gamma production)//GO:0019221(cytokine-mediated signaling pathway)//GO:0032496(response to lipopolysaccharide)//GO:0032729(positive regulation of interferon-gamma production)
DPH3	ENSGALG00000011237	protein_coding	-	chr2:34804926-34807738	19.4577	9.23958	2.1059	1.07444	0.31865	0.994263	up	420643	DPH3P1	CGNC:8537|Ensembl:ENSGALG00000011237	2	-	diphthamide biosynthesis 3		GO:0005654(nucleoplasm)//GO:0005829(cytosol)	GO:0046872(metal ion binding)	GO:0051099(positive regulation of binding)//GO:0050709(negative regulation of protein secretion)
LRRC40	ENSGALG00000011301	protein_coding	-	chr8:27890884-27906740	2.17045	0.885494	2.45112	1.29344	1	1	up	424713	-	CGNC:8592|Ensembl:ENSGALG00000011301	8	-	leucine rich repeat containing 40		GO:0016020(membrane)//GO:0005886(plasma membrane)		GO:0007165(signal transduction)
NEK10	ENSGALG00000011322	protein_coding	-	chr2:38961150-39013276	0.313866	0	inf	inf	1	1	up	776071	-	CGNC:66172	2	-	NIMA related kinase 10
GLB1L	ENSGALG00000011328	protein_coding	+	chr7:21710107-21714164	17.5342	7.24837	2.41905	1.27444	0.02465	0.994263	up	429037	-	CGNC:8609|Ensembl:ENSGALG00000011328	7	-	galactosidase beta 1 like		GO:0005615(extracellular space)//GO:0005773(vacuole)	GO:0004565(beta-galactosidase activity)	GO:0005975(carbohydrate metabolic process)
NHEJ1	ENSGALG00000011335	protein_coding	+	chr7:21764323-21795684	2.93615	1.06456	2.75809	1.46367	1	1	up	424205	-	CGNC:8616	7	-	non-homologous end joining factor 1	gga03450(Non-homologous end-joining)
IGFBP7	ENSGALG00000011339	protein_coding	+	chr4:48581285-48621169	1.63391	0	inf	inf	1	1	up	422620	-	CGNC:8619	4	-	insulin like growth factor binding protein 7
-	ENSGALG00000011345	protein_coding	-	chr3:41716184-41746473	0.403937	0	inf	inf	1	1	up
ERICH3	ENSGALG00000011356	protein_coding	-	chr8:28465963-28528000	0.322567	0.0877428	3.67629	1.87825	1	1	up	424719	C1orf173|C8H1orf173	CGNC:8634	8	-	glutamate-rich protein 3
MOK	ENSGALG00000011366	protein_coding	-	chr5:49456510-49472350	0.86689	0.353653	2.45124	1.29351	1	1	up	428910	RAGE	CGNC:8641	5	-	MOK protein kinase
CINP	ENSGALG00000011372	protein_coding	-	chr5:49493474-49497913	14.3138	3.89029	3.67937	1.87946	0.0899	0.994263	up	423467	2810452K22RIK	CGNC:51975|Ensembl:ENSGALG00000011372	5	-	cyclin dependent kinase 2 interacting protein
ANKRD9	ENSGALG00000011376	protein_coding	-	chr5:49550496-49551932	0.769795	0.313965	2.45185	1.29387	1	1	up	423469	-	CGNC:51976|Ensembl:ENSGALG00000011376	5	-	ankyrin repeat domain 9
-	ENSGALG00000011394	protein_coding	-	chr8:25579089-25585001	5.65246	2.06747	2.73399	1.45101	0.08415	0.994263	up
CFAP54	ENSGALG00000011459	protein_coding	+	chr1:45772310-45805255	0.523842	0.213732	2.45093	1.29333	1	1	up	417921	C12orf63|C1H12ORF63	CGNC:50620	1	-	cilia and flagella associated protein 54
OSBPL10	ENSGALG00000011474	protein_coding	-	chr2:40768624-40875297	1.01801	0.237341	4.28923	2.10072	1	1	up	420663	-	CGNC:8718	2	-	oxysterol binding protein like 10
CKB	ENSGALG00000011511	protein_coding	-	chr5:50128408-50229625	2.8075	0.229046	12.2574	3.61558	1	1	up	396248	-	CGNC:49719|Ensembl:ENSGALG00000011511	5	-	creatine kinase B	gga00330(Arginine and proline metabolism)//gga01100(Metabolic pathways)	GO:0043209(myelin sheath)//GO:0005829(cytosol)//GO:0005739(mitochondrion)//GO:0070062(extracellular exosome)//GO:0065010(extracellular membrane-bounded organelle)//GO:0005615(extracellular space)	GO:0005524(ATP binding)//GO:0004111(creatine kinase activity)//GO:0031625(ubiquitin protein ligase binding)	GO:0016310(phosphorylation)//GO:0021762(substantia nigra development)//GO:0006754(ATP biosynthetic process)
METTL6	ENSGALG00000011542	protein_coding	+	chr2:41990987-41999081	12.3697	5.32564	2.32266	1.21578	0.08805	0.994263	up	420681	-	CGNC:8772|Ensembl:ENSGALG00000040665	2	-	methyltransferase like 6
CNTNAP5	ENSGALG00000011577	protein_coding	-	chr7:23919266-24182349	0.287797	0	inf	inf	1	1	up	424231	CASPR5	CGNC:8800|Ensembl:ENSGALG00000011577	7	-	contactin associated protein like 5		GO:0016021(integral component of membrane)		GO:0007155(cell adhesion)
ASTE1	ENSGALG00000011595	protein_coding	-	chr2:42276961-42316295	2.57305	0.839705	3.06424	1.61553	1	1	up	420684	-	CGNC:8813	2	-	asteroid homolog 1 (Drosophila)
PLD4	ENSGALG00000011646	protein_coding	+	chr5:51693868-51705952	0.283687	0	inf	inf	1	1	up	423496	-	CGNC:8848|Ensembl:ENSGALG00000011646	5	-	phospholipase D family member 4	gga00564(Glycerophospholipid metabolism)//gga00565(Ether lipid metabolism)//gga01100(Metabolic pathways)
k60	ENSGALG00000011668	protein_coding	+	chr4:50342295-50345374	1.15142	0.313077	3.67777	1.87883	1	1	up
C14orf79	ENSGALG00000011690	protein_coding	+	chr5:51829754-51839632	3.5871	1.60981	2.22828	1.15593	1	1	up
ACKR4	ENSGALG00000011706	protein_coding	+	chr2:42887430-42915571	0.442403	0.18048	2.45125	1.29352	1	1	up	100859797	CCRL1	CGNC:66162	2	-	atypical chemokine receptor 4		GO:0016021(integral component of membrane)	GO:0019956(chemokine binding)//GO:0005044(scavenger receptor activity)//GO:0004950(chemokine receptor activity)	GO:0070098(chemokine-mediated signaling pathway)//GO:0007186(G-protein coupled receptor signaling pathway)//GO:0006898(receptor-mediated endocytosis)//GO:0006935(chemotaxis)
MGP	ENSGALG00000011740	protein_coding	+	chr1:47886139-47891373	1.67815	0	inf	inf	1	1	up	395912	-	CGNC:8922|Ensembl:ENSGALG00000011740	1	-	matrix Gla protein		GO:0031012(extracellular matrix)//GO:0070062(extracellular exosome)	GO:0005201(extracellular matrix structural constituent)//GO:0005509(calcium ion binding)	GO:0051216(cartilage development)//GO:0001503(ossification)//GO:0030154(cell differentiation)
APOLD1	ENSGALG00000011784	protein_coding	+	chr1:48049291-48049969	4.99326	1.35679	3.68021	1.87979	0.31605	0.994263	up	769889	-	CGNC:8939|Ensembl:ENSGALG00000011784	1	-	apolipoprotein L domain containing 1		GO:0005654(nucleoplasm)//GO:0016021(integral component of membrane)//GO:0005576(extracellular region)//GO:0005829(cytosol)	GO:0008289(lipid binding)	GO:0006869(lipid transport)//GO:0042157(lipoprotein metabolic process)
-	ENSGALG00000011792	protein_coding	-	chr4:51120506-51159534	0.318075	0	inf	inf	1	1	up
-	ENSGALG00000011799	protein_coding	-	chr1:48110388-48116612	6.41236	0.475374	13.4891	3.75372	0.25345	0.994263	up
ENGASE	ENSGALG00000011816	protein_coding	-	chr18:10024649-10029994	0.807111	0.164637	4.90237	2.29348	1	1	up	430102	-	CGNC:53859	18	-	endo-beta-N-acetylglucosaminidase	gga00511(Other glycan degradation)	GO:0005764(lysosome)//GO:0005615(extracellular space)//GO:0005829(cytosol)	GO:0016231(beta-N-acetylglucosaminidase activity)//GO:0033925(mannosyl-glycoprotein endo-beta-N-acetylglucosaminidase activity)//GO:0016787(hydrolase activity)	GO:0051672(catabolism by organism of cell wall peptidoglycan in other organism)
KCNH5	ENSGALG00000011858	protein_coding	+	chr5:53408532-53552358	1.0115	0	inf	inf	1	1	up	423514	-	CGNC:8988	5	-	potassium voltage-gated channel subfamily H member 5
ADAD1	ENSGALG00000011862	protein_coding	-	chr4:53143373-53154364	0.155256	0	inf	inf	1	1	up	422669	-	CGNC:8992|Ensembl:ENSGALG00000044995	4	-	adenosine deaminase domain containing 1
BBS7	ENSGALG00000011880	protein_coding	+	chr4:53335688-53350682	6.35062	2.4546	2.58723	1.37141	0.05595	0.994263	up	771481	-	CGNC:56810|Ensembl:ENSGALG00000011880	4	-	Bardet-Biedl syndrome 7		GO:0005930(axoneme)//GO:0016020(membrane)//GO:0034464(BBSome)//GO:0001750(photoreceptor outer segment)//GO:0005813(centrosome)//GO:0005634(nucleus)//GO:0036064(ciliary basal body)	GO:0001103(RNA polymerase II repressing transcription factor binding)	GO:0007507(heart development)//GO:0032436(positive regulation of proteasomal ubiquitin-dependent protein catabolic process)//GO:0007420(brain development)//GO:0060173(limb development)//GO:0008104(protein localization)//GO:0001654(eye development)//GO:0045444(fat cell differentiation)//GO:0060271(cilium assembly)//GO:0006357(regulation of transcription from RNA polymerase II promoter)//GO:0060021…
NAGA	ENSGALG00000011900	protein_coding	+	chr1:49284425-49288732	31.9393	15.9588	2.00136	1.00098	0.0204	0.994263	up	396547	-	CGNC:9022|Ensembl:ENSGALG00000011900	1	-	alpha-N-acetylgalactosaminidase	gga00603(Glycosphingolipid biosynthesis - globo series)//gga04142(Lysosome)	GO:0005764(lysosome)//GO:0070062(extracellular exosome)//GO:0005737(cytoplasm)	GO:0008456(alpha-N-acetylgalactosaminidase activity)//GO:0004557(alpha-galactosidase activity)//GO:0042803(protein homodimerization activity)	GO:0016052(carbohydrate catabolic process)//GO:0016139(glycoside catabolic process)//GO:0019377(glycolipid catabolic process)//GO:0046477(glycosylceramide catabolic process)//GO:0009311(oligosaccharide metabolic process)
-	ENSGALG00000011933	protein_coding	-	chr2:44224840-44253325	1.79668	0	inf	inf	1	1	up
-	ENSGALG00000011942	protein_coding	+	chr2:44572492-44577264	44.169	15.349	2.87763	1.52488	0.0228	0.994263	up
CHADL	ENSGALG00000011970	protein_coding	+	chr1:49611934-49615544	1.13669	0.397506	2.85955	1.51579	1	1	up	417998	-	CGNC:50649|Ensembl:ENSGALG00000011970	1	-	chondroadherin-like		GO:0031012(extracellular matrix)	GO:0005518(collagen binding)//GO:0098633(collagen fibril binding)	GO:0032331(negative regulation of chondrocyte differentiation)//GO:1904027(negative regulation of collagen fibril organization)
MYOZ2	ENSGALG00000011991	protein_coding	-	chr4:54193100-54210894	0.524566	0	inf	inf	1	1	up	422682	-	CGNC:9086|Ensembl:ENSGALG00000011991	4	-	myozenin 2
-	ENSGALG00000012021	protein_coding	+	chr5:54839245-54849270	16.1436	3.95091	4.08603	2.0307	0.01615	0.994263	up
PRRG4	ENSGALG00000012032	protein_coding	+	chr5:5617014-5623941	2.53364	0.590511	4.2906	2.10118	1	1	up	421600	-	CGNC:9120|Ensembl:ENSGALG00000012032	5	-	proline rich and Gla domain 4		GO:0016021(integral component of membrane)//GO:0005576(extracellular region)	GO:0005509(calcium ion binding)
ESYT3	ENSGALG00000012092	protein_coding	-	chr7:27789277-27816492	0.501571	0	inf	inf	1	1	up	424271	FAM62C	CGNC:9167|Ensembl:ENSGALG00000012092	7	-	extended synaptotagmin 3		GO:0031234(extrinsic component of cytoplasmic side of plasma membrane)//GO:0005887(integral component of plasma membrane)//GO:0031227(intrinsic component of endoplasmic reticulum membrane)//GO:0044232(organelle membrane contact site)	GO:0008289(lipid binding)
IMMP1L	ENSGALG00000012128	protein_coding	-	chr5:5047727-5066881	4.71578	0.960525	4.90958	2.2956	0.3441	0.994263	up	771365	-	CGNC:9199|Ensembl:ENSGALG00000012128	5	-	inner mitochondrial membrane peptidase subunit 1	gga03060(Protein export)	GO:0042720(mitochondrial inner membrane peptidase complex)	GO:0008236(serine-type peptidase activity)	GO:0033108(mitochondrial respiratory chain complex assembly)//GO:0006627(protein processing involved in protein targeting to mitochondrion)//GO:0006465(signal peptide processing)
DNAJC24	ENSGALG00000012130	protein_coding	+	chr5:5014652-5046383	5.85519	1.79014	3.27079	1.70964	0.30165	0.994263	up	421603	DPH4|ZCSL3	CGNC:9201|Ensembl:ENSGALG00000012130	5	-	DnaJ heat shock protein family (Hsp40) member C24			GO:0046872(metal ion binding)
TAB1	ENSGALG00000012150	protein_coding	-	chr1:50517362-50525791	5.62798	2.38778	2.357	1.23695	0.1353	0.994263	up	418014	MAP3K7IP1|TAK1	CGNC:50652|Ensembl:ENSGALG00000012150	1	-	TGF-beta activated kinase 1 (MAP3K7) binding protein 1	gga04010(MAPK signaling pathway)//gga04620(Toll-like receptor signaling pathway)//gga04621(NOD-like receptor signaling pathway)//gga05168(Herpes simplex infection)	GO:0016607(nuclear speck)//GO:0005829(cytosol)	GO:0019209(kinase activator activity)//GO:0004722(protein serine/threonine phosphatase activity)	GO:0007249(I-kappaB kinase/NF-kappaB signaling)//GO:0035904(aorta development)//GO:0003279(cardiac septum development)//GO:0003007(heart morphogenesis)//GO:0050853(B cell receptor signaling pathway)//GO:0060976(coronary vasculature development)//GO:0007179(transforming growth factor beta receptor signaling pathway)//GO:0006470(protein dephosphorylation)//GO:0030324(lung development)//GO:0000185(a…
BDNF	ENSGALG00000012163	protein_coding	-	chr5:3757391-3758132	54.5531	24.0414	2.26913	1.18214	0.02855	0.994263	up	396186	-	CGNC:9230|Ensembl:ENSGALG00000012163	5	-	brain derived neurotrophic factor	gga04010(MAPK signaling pathway)	GO:0005634(nucleus)//GO:0005576(extracellular region)//GO:0031410(cytoplasmic vesicle)//GO:0005737(cytoplasm)//GO:0048471(perinuclear region of cytoplasm)	GO:0008083(growth factor activity)//GO:0005169(neurotrophin TRKB receptor binding)	GO:0009408(response to heat)//GO:0007267(cell-cell signaling)//GO:0043524(negative regulation of neuron apoptotic process)//GO:0045664(regulation of neuron differentiation)//GO:0048812(neuron projection morphogenesis)//GO:0007169(transmembrane receptor protein tyrosine kinase signaling pathway)
RRH	ENSGALG00000012181	protein_coding	-	chr4:57708910-57722892	0.20737	0.0846118	2.45083	1.29327	1	1	up	771805	-	CGNC:9245|Ensembl:ENSGALG00000012181	4	-	retinal pigment epithelium-derived rhodopsin homolog		GO:0016021(integral component of membrane)//GO:0001750(photoreceptor outer segment)	GO:0008020(G-protein coupled photoreceptor activity)	GO:0018298(protein-chromophore linkage)//GO:0007186(G-protein coupled receptor signaling pathway)//GO:0007601(visual perception)//GO:0009584(detection of visible light)
CCDC34	ENSGALG00000012194	protein_coding	-	chr5:3627317-3645623	1.44303	0.588256	2.45306	1.29458	1	1	up	421609	-	CGNC:9257	5	-	coiled-coil domain containing 34
-	ENSGALG00000012250	protein_coding	-	chr4:59594469-59604806	1.85652	0.841547	2.20609	1.14149	1	1	up
TRMT10A	ENSGALG00000012264	protein_coding	-	chr4:59624812-59633939	2.08621	0.972551	2.14509	1.10104	1	1	up	422708	RG9MTD2	CGNC:9314|Ensembl:ENSGALG00000012264	4	-	tRNA methyltransferase 10A		GO:0005654(nucleoplasm)//GO:0005829(cytosol)//GO:0015629(actin cytoskeleton)//GO:0070062(extracellular exosome)//GO:0005730(nucleolus)	GO:0009019(tRNA (guanine-N1-)-methyltransferase activity)//GO:0000049(tRNA binding)	GO:0030488(tRNA methylation)
RAB32	ENSGALG00000012300	protein_coding	+	chr3:46154327-46173538	3.14725	0.641989	4.90234	2.29347	1	1	up	421616	-	CGNC:9345|Ensembl:ENSGALG00000012300	3	-	RAB32, member RAS oncogene family		GO:0044233(ER-mitochondrion membrane contact site)//GO:0005802(trans-Golgi network)//GO:0033162(melanosome membrane)//GO:0005739(mitochondrion)//GO:0005741(mitochondrial outer membrane)//GO:0042470(melanosome)//GO:0005783(endoplasmic reticulum)//GO:0005769(early endosome)//GO:0045335(phagocytic vesicle)	GO:0003924(GTPase activity)//GO:0030742(GTP-dependent protein binding)//GO:0035651(AP-3 adaptor complex binding)//GO:0036461(BLOC-2 complex binding)//GO:0005525(GTP binding)//GO:0035650(AP-1 adaptor complex binding)	GO:0090382(phagosome maturation)//GO:0032438(melanosome organization)//GO:0035646(endosome to melanosome transport)//GO:0019882(antigen processing and presentation)//GO:0007005(mitochondrion organization)//GO:0016192(vesicle-mediated transport)//GO:0072657(protein localization to membrane)//GO:1903232(melanosome assembly)
-	ENSGALG00000012324	protein_coding	+	chr2:50574639-50637586	2.65959	0	inf	inf	1	1	up
BDH2	ENSGALG00000012338	protein_coding	-	chr4:60581710-60595813	5.38654	1.79058	3.00826	1.58893	0.06835	0.994263	up	422715	DHRS6	CGNC:9371|Ensembl:ENSGALG00000012338	4	-	3-hydroxybutyrate dehydrogenase, type 2	gga00072(Synthesis and degradation of ketone bodies)//gga00650(Butanoate metabolism)//gga01100(Metabolic pathways)	GO:0070062(extracellular exosome)//GO:0005829(cytosol)	GO:0051287(NAD binding)//GO:0003858(3-hydroxybutyrate dehydrogenase activity)	GO:0006635(fatty acid beta-oxidation)//GO:0030855(epithelial cell differentiation)
-	ENSGALG00000012416	protein_coding	+	chr1:51000074-51005700	0.430529	0	inf	inf	1	1	up
IGFBP3	ENSGALG00000012439	protein_coding	-	chr2:55011806-55031149	2.68101	0.729229	3.67649	1.87833	1	1	up	420790	-	CGNC:9448|Ensembl:ENSGALG00000037940	2	-	insulin like growth factor binding protein 3	gga04115(p53 signaling pathway)	GO:0005634(nucleus)//GO:0042567(insulin-like growth factor ternary complex)//GO:0070062(extracellular exosome)	GO:0001968(fibronectin binding)//GO:0008160(protein tyrosine phosphatase activator activity)//GO:0031994(insulin-like growth factor I binding)	GO:0045663(positive regulation of myoblast differentiation)//GO:0044342(type B pancreatic cell proliferation)//GO:0010906(regulation of glucose metabolic process)//GO:0043065(positive regulation of apoptotic process)//GO:0006468(protein phosphorylation)//GO:0014912(negative regulation of smooth muscle cell migration)//GO:0043568(positive regulation of insulin-like growth factor receptor signaling…
-	ENSGALG00000012450	protein_coding	-	chr2:55403938-55410942	14.207	4.63429	3.06564	1.61619	0.0752	0.994263	up
CYTH4	ENSGALG00000012454	protein_coding	-	chr1:51229150-51248424	0.541408	0	inf	inf	1	1	up	418043	PSCD4|cytohesin-4	CGNC:50660|Ensembl:ENSGALG00000012454	1	-	cytohesin 4	gga04144(Endocytosis)	GO:0005886(plasma membrane)	GO:0005086(ARF guanyl-nucleotide exchange factor activity)	GO:0032012(regulation of ARF protein signal transduction)//GO:0043547(positive regulation of GTPase activity)
TMPRSS6	ENSGALG00000012483	protein_coding	+	chr1:51317876-51335342	0.186254	0	inf	inf	1	1	up	418046	-	CGNC:9483|Ensembl:ENSGALG00000012483	1	-	transmembrane protease, serine 6		GO:0005886(plasma membrane)//GO:0005615(extracellular space)//GO:0016021(integral component of membrane)	GO:0004252(serine-type endopeptidase activity)	GO:0097264(self proteolysis)//GO:0030514(negative regulation of BMP signaling pathway)//GO:0033619(membrane protein proteolysis)//GO:0042730(fibrinolysis)//GO:0006879(cellular iron ion homeostasis)//GO:0045944(positive regulation of transcription from RNA polymerase II promoter)//GO:0000122(negative regulation of transcription from RNA polymerase II promoter)
MPST	ENSGALG00000012487	protein_coding	-	chr1:51349988-51355027	9.8377	3.25386	3.0234	1.59617	0.03495	0.994263	up	418048	-	CGNC:50661|Ensembl:ENSGALG00000040840	1	-	mercaptopyruvate sulfurtransferase	gga00270(Cysteine and methionine metabolism)//gga00920(Sulfur metabolism)//gga01100(Metabolic pathways)//gga04122(Sulfur relay system)		GO:0004792(thiosulfate sulfurtransferase activity)
CD1A1	ENSGALG00000012494	protein_coding	+	chr16:2101-4938	0.414293	0	inf	inf	1	1	up
RASD2	ENSGALG00000012542	protein_coding	-	chr1:51881967-51884335	0.655257	0	inf	inf	1	1	up	418057	-	CGNC:9520|Ensembl:ENSGALG00000012542	1	-	RASD family member 2		GO:0016020(membrane)	GO:0003924(GTPase activity)//GO:0005525(GTP binding)//GO:0031681(G-protein beta-subunit binding)	GO:0001963(synaptic transmission, dopaminergic)//GO:0007626(locomotory behavior)//GO:0007165(signal transduction)
GALNT5	ENSGALG00000012544	protein_coding	+	chr7:35699645-35712432	0.295034	0	inf	inf	1	1	up	424324	-	CGNC:9522	7	-	polypeptide N-acetylgalactosaminyltransferase 5	gga00512(Mucin type O-Glycan biosynthesis)//gga01100(Metabolic pathways)
CYTIP	ENSGALG00000012545	protein_coding	-	chr7:35716691-35725457	0.981866	0.266996	3.67746	1.87871	1	1	up	429052	PSCDBP	CGNC:9523|Ensembl:ENSGALG00000012545	7	-	cytohesin 1 interacting protein		GO:0005654(nucleoplasm)//GO:0005938(cell cortex)//GO:0005829(cytosol)		GO:0030155(regulation of cell adhesion)
ACVR1C	ENSGALG00000012547	protein_coding	-	chr7:35731033-35744854	0.547651	0.0638466	8.57764	3.10058	1	1	up	424325	-	CGNC:9525|Ensembl:ENSGALG00000041257	7	-	activin A receptor type 1C	gga04350(TGF-beta signaling pathway)	GO:0016021(integral component of membrane)	GO:0005524(ATP binding)//GO:0004702(signal transducer, downstream of receptor, with serine/threonine kinase activity)//GO:0004675(transmembrane receptor protein serine/threonine kinase activity)	GO:0023014(signal transduction by protein phosphorylation)//GO:0007178(transmembrane receptor protein serine/threonine kinase signaling pathway)
TLE1	ENSGALG00000012575	protein_coding	-	chrZ:39039874-39114050	0.922623	0.322691	2.85916	1.51559	1	1	up	427450	-	CGNC:9545|Ensembl:ENSGALG00000012575	Z	-	transducin like enhancer of split 1		GO:0005634(nucleus)		GO:0006355(regulation of transcription, DNA-templated)
AGTPBP1	ENSGALG00000012595	protein_coding	-	chrZ:40523517-40576398	0.116612	0.0475836	2.45068	1.29318	1	1	up	427460	-	CGNC:9560|Ensembl:ENSGALG00000012595	Z	-	ATP/GTP binding protein 1		GO:0005739(mitochondrion)//GO:0005634(nucleus)//GO:0005730(nucleolus)//GO:0005737(cytoplasm)//GO:0005829(cytosol)	GO:0008270(zinc ion binding)//GO:0015631(tubulin binding)//GO:0004181(metallocarboxypeptidase activity)	GO:0007628(adult walking behavior)//GO:0035610(protein side chain deglutamylation)//GO:0060041(retina development in camera-type eye)//GO:0021772(olfactory bulb development)//GO:0050905(neuromuscular process)//GO:0042133(neurotransmitter metabolic process)//GO:0007005(mitochondrion organization)//GO:0035609(C-terminal protein deglutamylation)//GO:0001754(eye photoreceptor cell differentiation)//G…
-	ENSGALG00000012674	protein_coding	-	chr1:54408434-54444482	0.235598	0.0961276	2.45088	1.2933	1	1	up
C12orf45	ENSGALG00000012694	protein_coding	-	chr1:54283952-54287411	2.50992	1.02232	2.45511	1.29579	1	1	up
NOL7	ENSGALG00000012695	protein_coding	+	chr2:60602903-60606024	17.1421	7.29163	2.35093	1.23323	0.13965	0.994263	up	420835	-	CGNC:9631|Ensembl:ENSGALG00000012695	2	-	nucleolar protein 7		GO:0005634(nucleus)
SLC41A2	ENSGALG00000012697	protein_coding	+	chr1:54288078-54338901	1.98441	0.899539	2.20604	1.14146	1	1	up	427913	-	CGNC:53224|Ensembl:ENSGALG00000012697	1	-	solute carrier family 41 member 2		GO:0016021(integral component of membrane)//GO:0005886(plasma membrane)	GO:0008324(cation transmembrane transporter activity)//GO:0072509(divalent inorganic cation transmembrane transporter activity)	GO:0070838(divalent metal ion transport)//GO:0055085(transmembrane transport)//GO:0098655(cation transmembrane transport)
MYLIP	ENSGALG00000012704	protein_coding	+	chr2:61562079-61576684	0.279085	0	inf	inf	1	1	up	420841	-	CGNC:9639|Ensembl:ENSGALG00000012704	2	-	myosin regulatory light chain interacting protein		GO:0005856(cytoskeleton)	GO:0004842(ubiquitin-protein transferase activity)//GO:0008092(cytoskeletal protein binding)//GO:0005200(structural constituent of cytoskeleton)//GO:0061630(ubiquitin protein ligase activity)	GO:0045732(positive regulation of protein catabolic process)//GO:0031032(actomyosin structure organization)//GO:0032803(regulation of low-density lipoprotein particle receptor catabolic process)//GO:0010989(negative regulation of low-density lipoprotein particle clearance)//GO:0042632(cholesterol homeostasis)//GO:0042787(protein ubiquitination involved in ubiquitin-dependent protein catabolic pro…
BPHL	ENSGALG00000012824	protein_coding	-	chr2:66376323-66400743	0.830982	0.339043	2.45097	1.29335	1	1	up	420885	-	CGNC:9718|Ensembl:ENSGALG00000029659	2	-	biphenyl hydrolase like
-	ENSGALG00000012847	protein_coding	-	chr1:56787532-56803606	0.202885	0	inf	inf	1	1	up
PIGN	ENSGALG00000012903	protein_coding	+	chr2:68405651-68508208	6.04039	2.30722	2.61803	1.38848	0.0422	0.994263	up	420908	-	CGNC:9771|Ensembl:ENSGALG00000012903	2	-	phosphatidylinositol glycan anchor biosynthesis class N	gga00563(Glycosylphosphatidylinositol(GPI)-anchor biosynthesis)//gga01100(Metabolic pathways)	GO:0005886(plasma membrane)//GO:0005789(endoplasmic reticulum membrane)//GO:0016021(integral component of membrane)//GO:0005829(cytosol)	GO:0051377(mannose-ethanolamine phosphotransferase activity)	GO:0006506(GPI anchor biosynthetic process)
CDH20	ENSGALG00000012906	protein_coding	-	chr2:68541076-68785639	0.257445	0	inf	inf	1	1	up	373927	-	CGNC:9773|Ensembl:ENSGALG00000012906	2	-	cadherin 20, type 2		GO:0005886(plasma membrane)//GO:0016021(integral component of membrane)	GO:0005509(calcium ion binding)	GO:0007156(homophilic cell adhesion via plasma membrane adhesion molecules)
WNT5B	ENSGALG00000012998	protein_coding	+	chr1:61044204-61059847	0.454081	0	inf	inf	1	1	up	418154	-	CGNC:9838|Ensembl:ENSGALG00000012998	1	-	Wnt family member 5B	gga04310(Wnt signaling pathway)//gga04340(Hedgehog signaling pathway)//gga04916(Melanogenesis)	GO:0005578(proteinaceous extracellular matrix)//GO:0070062(extracellular exosome)//GO:0005615(extracellular space)//GO:0009986(cell surface)	GO:0005109(frizzled binding)	GO:0045600(positive regulation of fat cell differentiation)//GO:0090090(negative regulation of canonical Wnt signaling pathway)//GO:0016055(Wnt signaling pathway)//GO:0045165(cell fate commitment)//GO:0030335(positive regulation of cell migration)//GO:0002062(chondrocyte differentiation)//GO:0030182(neuron differentiation)
SNRNP48	ENSGALG00000013005	protein_coding	+	chr2:78246698-78252721	3.60742	0.905561	3.98362	1.99408	1	1	up	420925	C6orf151	CGNC:9843|Ensembl:ENSGALG00000013005	2	-	small nuclear ribonucleoprotein U11/U12 subunit 48		GO:0005654(nucleoplasm)//GO:0005689(U12-type spliceosomal complex)//GO:0005829(cytosol)	GO:0003676(nucleic acid binding)
CACNA2D4	ENSGALG00000013007	protein_coding	-	chr1:61113932-61229536	0.396456	0	inf	inf	1	1	up	100858946	-	CGNC:66086	1	-	calcium voltage-gated channel auxiliary subunit alpha2delta 4	gga04010(MAPK signaling pathway)//gga04260(Cardiac muscle contraction)//gga04261(Adrenergic signaling in cardiomyocytes)
FAM173B	ENSGALG00000013043	protein_coding	+	chr2:78404318-78411897	8.67522	0.642934	13.4932	3.75416	0.25345	0.994263	up	428500	-	CGNC:53383|Ensembl:ENSGALG00000013043	2	-	family with sequence similarity 173 member B		GO:0016021(integral component of membrane)
EPS8	ENSGALG00000013091	protein_coding	-	chr1:63087278-63140780	0.349614	0	inf	inf	1	1	up	418174	-	CGNC:9898	1	-	epidermal growth factor receptor pathway substrate 8
BAG1	ENSGALG00000013157	protein_coding	-	chr2:85647212-85656438	12.954	5.71205	2.26784	1.18132	0.08865	0.994263	up	420967	-	CGNC:9935|Ensembl:ENSGALG00000013157	2	-	BCL2 associated athanogene 1	gga04141(Protein processing in endoplasmic reticulum)		GO:0051087(chaperone binding)
TERT	ENSGALG00000013183	protein_coding	-	chr2:85762001-85791468	0.177698	0	inf	inf	1	1	up	420972	chTERT	CGNC:9953|Ensembl:ENSGALG00000013183	2	-	telomerase reverse transcriptase		GO:1990572(TERT-RMRP complex)//GO:0005886(plasma membrane)//GO:0042645(mitochondrial nucleoid)//GO:0000333(telomerase catalytic core complex)//GO:0000784(nuclear chromosome, telomeric region)//GO:0016605(PML body)//GO:0005730(nucleolus)	GO:0001223(transcription coactivator binding)//GO:0003721(telomerase RNA reverse transcriptase activity)//GO:0070034(telomerase RNA binding)//GO:0042803(protein homodimerization activity)//GO:0047485(protein N-terminus binding)//GO:0000049(tRNA binding)//GO:0003968(RNA-directed 5'-3' RNA polymerase activity)//GO:0051087(chaperone binding)//GO:0042162(telomeric DNA binding)//GO:0098680(template-fr…	GO:0046326(positive regulation of glucose import)//GO:2000648(positive regulation of stem cell proliferation)//GO:2000773(negative regulation of cellular senescence)//GO:0030177(positive regulation of Wnt signaling pathway)//GO:0042635(positive regulation of hair cycle)//GO:0007004(telomere maintenance via telomerase)//GO:1904751(positive regulation of protein localization to nucleolus)//GO:00510…
-	ENSGALG00000013270	protein_coding	-	chr13:14295425-14509385	2.09732	0	inf	inf	1	1	up
RSPH4A	ENSGALG00000013281	protein_coding	-	chr4:60636157-60645504	0.393407	0.160497	2.45117	1.29347	1	1	up	422717	RSHL3	CGNC:51811	4	-	radial spoke head 4 homolog A
-	ENSGALG00000013512	protein_coding	-	chrZ:24595533-24602096	52.901	22.9472	2.30534	1.20498	0.0175	0.994263	up
ACOT13	ENSGALG00000013632	protein_coding	-	chr2:90244562-90249282	28.009	12.4237	2.25447	1.17279	0.0501	0.994263	up	421006	THEM2	CGNC:10216|Ensembl:ENSGALG00000013632	2	-	acyl-CoA thioesterase 13		GO:0005739(mitochondrion)//GO:0005634(nucleus)//GO:0005737(cytoplasm)//GO:0070062(extracellular exosome)	GO:0047617(acyl-CoA hydrolase activity)	GO:0051289(protein homotetramerization)
FBXO15	ENSGALG00000013720	protein_coding	+	chr2:91997446-92017532	0.68895	0	inf	inf	1	1	up	421017	-	CGNC:10270|Ensembl:ENSGALG00000013720	2	-	F-box protein 15
CD226	ENSGALG00000013748	protein_coding	+	chr2:93698469-93716328	1.34297	0	inf	inf	1	1	up	772097	-	CGNC:10292	2	-	CD226 molecule	gga04514(Cell adhesion molecules (CAMs))
RSPH3	ENSGALG00000013750	protein_coding	+	chr3:51509717-51518265	0.790747	0	inf	inf	1	1	up	421663	RSHL2	CGNC:10293|Ensembl:ENSGALG00000046008	3	-	radial spoke 3 homolog
MRPL47	ENSGALG00000013759	protein_coding	+	chr9:16907571-16911041	18.2676	7.76104	2.35376	1.23497	0.0521	0.994263	up	424977	-	CGNC:52304|Ensembl:ENSGALG00000013759	9	-	mitochondrial ribosomal protein L47		GO:0005762(mitochondrial large ribosomal subunit)	GO:0003735(structural constituent of ribosome)	GO:0032543(mitochondrial translation)
NAA38	ENSGALG00000013787	protein_coding	+	chr19:31402-32974	21.3351	10.3069	2.06998	1.04962	0.1612	0.994263	up	426258	LSMD1	CGNC:10325|Ensembl:ENSGALG00000045783	19	-	N(alpha)-acetyltransferase 38, NatC auxiliary subunit		GO:0031417(NatC complex)
GALM	ENSGALG00000013828	protein_coding	+	chr3:15865910-15881797	25.4782	12.2054	2.08745	1.06174	0.1663	0.994263	up	426268	-	CGNC:10350|Ensembl:ENSGALG00000013828	3	-	galactose mutarotase	gga00010(Glycolysis / Gluconeogenesis)//gga00052(Galactose metabolism)//gga01100(Metabolic pathways)		GO:0030246(carbohydrate binding)//GO:0004034(aldose 1-epimerase activity)	GO:0033499(galactose catabolic process via UDP-galactose)//GO:0006006(glucose metabolic process)
CCDC28A	ENSGALG00000013834	protein_coding	-	chr3:53463443-53467729	16.673	5.43422	3.06815	1.61737	0.1636	0.994263	up	421679	-	CGNC:10354|Ensembl:ENSGALG00000013834	3	-	coiled-coil domain containing 28A
PEX7	ENSGALG00000013874	protein_coding	-	chr3:54204621-54237869	4.76101	0	inf	inf	0.00095	0.530643	up	421687	-	CGNC:10380|Ensembl:ENSGALG00000013874	3	-	peroxisomal biogenesis factor 7	gga04146(Peroxisome)	GO:0005782(peroxisomal matrix)//GO:0005829(cytosol)	GO:0019899(enzyme binding)//GO:0005053(peroxisome matrix targeting signal-2 binding)//GO:0042803(protein homodimerization activity)	GO:0008611(ether lipid biosynthetic process)//GO:0006635(fatty acid beta-oxidation)//GO:0001764(neuron migration)//GO:0016558(protein import into peroxisome matrix)//GO:0001958(endochondral ossification)
FAM136A	ENSGALG00000013876	protein_coding	-	chr22:2995890-2998638	16.9256	8.04066	2.105	1.07382	0.31865	0.994263	up	426296	-	CGNC:52739|Ensembl:ENSGALG00000042163	22	-	family with sequence similarity 136 member A
MXD1	ENSGALG00000013882	protein_coding	+	chr22:2960159-2962450	2.45702	0	inf	inf	1	1	up	426299	-	CGNC:10387|Ensembl:ENSGALG00000013882	22	-	MAX dimerization protein 1		GO:0005654(nucleoplasm)//GO:0005739(mitochondrion)//GO:0005829(cytosol)//GO:0000790(nuclear chromatin)	GO:0000978(RNA polymerase II core promoter proximal region sequence-specific DNA binding)//GO:0046983(protein dimerization activity)//GO:0001078(transcriptional repressor activity, RNA polymerase II core promoter proximal region sequence-specific binding)	GO:0000122(negative regulation of transcription from RNA polymerase II promoter)
SERINC4	ENSGALG00000013914	protein_coding	+	chr10:19616508-19620261	0.216377	0	inf	inf	1	1	up	430755	-	CGNC:10408|Ensembl:ENSGALG00000042029	10	-	serine incorporator 4
HYPK	ENSGALG00000013916	protein_coding	-	chr10:19610732-19616269	46.6856	23.0199	2.02805	1.02009	0.2215	0.994263	up	770307	-	CGNC:10409|Ensembl:ENSGALG00000013916	10	-	huntingtin interacting protein K		GO:0005654(nucleoplasm)//GO:0043234(protein complex)//GO:0015630(microtubule cytoskeleton)//GO:0005737(cytoplasm)	GO:0047485(protein N-terminus binding)	GO:0050821(protein stabilization)//GO:0043066(negative regulation of apoptotic process)
PDGFRA	ENSGALG00000013929	protein_coding	-	chr4:65003746-65031783	0.117234	0.0478373	2.45068	1.29318	1	1	up	395509	PDGFR|PDGFR-A	CGNC:10416|Ensembl:ENSGALG00000013929	4	-	platelet-derived growth factor receptor, alpha polypeptide	gga04010(MAPK signaling pathway)//gga04020(Calcium signaling pathway)//gga04060(Cytokine-cytokine receptor interaction)//gga04144(Endocytosis)//gga04510(Focal adhesion)//gga04540(Gap junction)//gga04810(Regulation of actin cytoskeleton)	GO:0009897(external side of plasma membrane)//GO:0005887(integral component of plasma membrane)//GO:0043234(protein complex)//GO:0005886(plasma membrane)//GO:0030054(cell junction)//GO:0016021(integral component of membrane)//GO:0005902(microvillus)//GO:0005634(nucleus)//GO:0005737(cytoplasm)	GO:0005021(vascular endothelial growth factor-activated receptor activity)//GO:0038085(vascular endothelial growth factor binding)//GO:0032403(protein complex binding)//GO:0042803(protein homodimerization activity)//GO:0005524(ATP binding)//GO:0005161(platelet-derived growth factor receptor binding)//GO:0048407(platelet-derived growth factor binding)//GO:0005018(platelet-derived growth factor alp…	GO:0061298(retina vasculature development in camera-type eye)//GO:0060021(palate development)//GO:0071230(cellular response to amino acid stimulus)//GO:0034614(cellular response to reactive oxygen species)//GO:0023019(signal transduction involved in regulation of gene expression)//GO:0038091(positive regulation of cell proliferation by VEGF-activated platelet derived growth factor receptor signal…
RASL11B	ENSGALG00000013948	protein_coding	-	chr4:65555015-65557517	1.51561	0.617812	2.45319	1.29466	1	1	up	422756	-	CGNC:10429|Ensembl:ENSGALG00000013948	4	-	RAS like family 11 member B		GO:0016020(membrane)	GO:0003924(GTPase activity)//GO:0005160(transforming growth factor beta receptor binding)//GO:0005525(GTP binding)	GO:0030512(negative regulation of transforming growth factor beta receptor signaling pathway)//GO:0007165(signal transduction)
-	ENSGALG00000013992	protein_coding	+	chr3:56080842-56088624	1.47075	0.719922	2.04293	1.03064	1	1	up
LYRM5	ENSGALG00000014031	protein_coding	+	chr1:67331583-67359692	3.27063	0.667149	4.90241	2.29349	1	1	up
TSPAN18	ENSGALG00000014072	protein_coding	+	chr5:21455062-21473619	1.22009	0	inf	inf	1	1	up	395586	tetraspanin-18	CGNC:10503|Ensembl:ENSGALG00000036901	5	-	tetraspanin 18		GO:0016021(integral component of membrane)
CWH43	ENSGALG00000014080	protein_coding	-	chr4:65834287-65859538	0.231113	0	inf	inf	1	1	up	422763	-	CGNC:51821|Ensembl:ENSGALG00000041921	4	-	cell wall biogenesis 43 C-terminal homolog		GO:0016021(integral component of membrane)
-	ENSGALG00000014126	protein_coding	+	chr1:68465288-68474995	0.295647	0	inf	inf	1	1	up
BIK	ENSGALG00000014164	protein_coding	+	chr1:68652275-68664289	0.968727	0	inf	inf	1	1	up	776149	-	CGNC:57678|Ensembl:ENSGALG00000014164	1	-	BCL2 interacting killer		GO:0016021(integral component of membrane)		GO:0006915(apoptotic process)
UCH-L1	ENSGALG00000014261	protein_coding	-	chr4:68252125-68256752	1.83063	0	inf	inf	1	1	up
UBE2K	ENSGALG00000014290	protein_coding	-	chr4:68776093-68796204	56.1036	25.7119	2.182	1.12565	0.063	0.994263	up	428787	E2-25K|HIP2|HYPG|LIG	CGNC:10645|Ensembl:ENSGALG00000014290	4	-	ubiquitin conjugating enzyme E2 K	gga04120(Ubiquitin mediated proteolysis)	GO:0032433(filopodium tip)//GO:0005634(nucleus)//GO:0005737(cytoplasm)//GO:0070062(extracellular exosome)	GO:0005524(ATP binding)//GO:0031625(ubiquitin protein ligase binding)//GO:0034450(ubiquitin-ubiquitin ligase activity)	GO:0070936(protein K48-linked ubiquitination)//GO:0010994(free ubiquitin chain polymerization)//GO:0032434(regulation of proteasomal ubiquitin-dependent protein catabolic process)//GO:0010800(positive regulation of peptidyl-threonine phosphorylation)//GO:0035458(cellular response to interferon-beta)//GO:0060340(positive regulation of type I interferon-mediated signaling pathway)
-	ENSGALG00000014313	protein_coding	-	chr5:15212488-15215738	1.43124	0	inf	inf	1	1	up
RBM34	ENSGALG00000014328	protein_coding	+	chr3:37525797-37533218	12.0489	4.33626	2.77864	1.47438	0.065	0.994263	up	426311	-	CGNC:10668	3	-	RNA binding motif protein 34
APOA5	ENSGALG00000014368	protein_coding	-	chr24:5099631-5101703	0.686045	0	inf	inf	1	1	up	419802	-	CGNC:10694|Ensembl:ENSGALG00000014368	24	-	apolipoprotein A5	gga03320(PPAR signaling pathway)	GO:0042627(chylomicron)//GO:0072562(blood microparticle)//GO:0034361(very-low-density lipoprotein particle)//GO:0034364(high-density lipoprotein particle)	GO:0015485(cholesterol binding)//GO:0031210(phosphatidylcholine binding)//GO:0050750(low-density lipoprotein particle receptor binding)//GO:0060228(phosphatidylcholine-sterol O-acyltransferase activator activity)//GO:0017127(cholesterol transporter activity)//GO:0008201(heparin binding)//GO:0035473(lipase binding)//GO:0060230(lipoprotein lipase activator activity)	GO:0043691(reverse cholesterol transport)//GO:0010902(positive regulation of very-low-density lipoprotein particle remodeling)//GO:0042157(lipoprotein metabolic process)//GO:0070328(triglyceride homeostasis)//GO:0010873(positive regulation of cholesterol esterification)//GO:0031102(neuron projection regeneration)//GO:0033344(cholesterol efflux)//GO:0051006(positive regulation of lipoprotein lipas…
PACRGL	ENSGALG00000014406	protein_coding	-	chr4:74436583-74539587	6.12716	1.33275	4.59737	2.20081	0.1396	0.994263	up	422818	C4orf28	CGNC:10719	4	-	PARK2 co-regulated like
MRPL51	ENSGALG00000014435	protein_coding	-	chr1:76399983-76401537	14.6124	5.96019	2.45166	1.29376	0.05505	0.994263	up	418274	-	CGNC:50723|Ensembl:ENSGALG00000014435	1	-	mitochondrial ribosomal protein L51		GO:0005762(mitochondrial large ribosomal subunit)	GO:0003735(structural constituent of ribosome)	GO:0006412(translation)
MTR	ENSGALG00000014464	protein_coding	-	chr3:36890572-36933337	1.7061	0.655184	2.604	1.38073	1	1	up	422069	-	CGNC:51612|Ensembl:ENSGALG00000014464	3	-	5-methyltetrahydrofolate-homocysteine methyltransferase	gga00270(Cysteine and methionine metabolism)//gga00450(Selenocompound metabolism)//gga00670(One carbon pool by folate)//gga01100(Metabolic pathways)//gga01230(Biosynthesis of amino acids)	GO:0005829(cytosol)	GO:0008705(methionine synthase activity)//GO:0008270(zinc ion binding)//GO:0031419(cobalamin binding)	GO:0009235(cobalamin metabolic process)//GO:0009086(methionine biosynthetic process)//GO:0032259(methylation)//GO:0042558(pteridine-containing compound metabolic process)
KIAA0825	ENSGALG00000014664	protein_coding	+	chrZ:57704975-57809334	1.15731	0.217949	5.31003	2.40872	1	1	up	427110	-	CGNC:52991|Ensembl:ENSGALG00000014664	Z	-	KIAA0825
-	ENSGALG00000014680	protein_coding	-	chr1:76902134-76904840	4.46112	2.1832	2.04338	1.03096	0.3622	0.994263	up
PLPP1	ENSGALG00000014711	protein_coding	-	chrZ:16664861-16719903	1.4062	0	inf	inf	1	1	up	427138	PPAP2A	CGNC:10906|Ensembl:ENSGALG00000014711	Z	-	phospholipid phosphatase 1	gga00561(Glycerolipid metabolism)//gga00564(Glycerophospholipid metabolism)//gga00565(Ether lipid metabolism)//gga00600(Sphingolipid metabolism)//gga01100(Metabolic pathways)
-	ENSGALG00000014750	protein_coding	+	chr1:77553297-77554871	1.25658	0	inf	inf	1	1	up
STYK1	ENSGALG00000014759	protein_coding	+	chr1:77852890-77868563	0.269943	0	inf	inf	1	1	up	418310	-	CGNC:10946	1	-	serine/threonine/tyrosine kinase 1
MRPS36	ENSGALG00000014789	protein_coding	+	chrZ:21776239-21783588	13.6865	6.69328	2.04481	1.03197	0.27825	0.994263	up	771273	-	CGNC:10968|Ensembl:ENSGALG00000014789	Z	-	mitochondrial ribosomal protein S36		GO:0005763(mitochondrial small ribosomal subunit)//GO:0009353(mitochondrial oxoglutarate dehydrogenase complex)
HOMER1	ENSGALG00000014813	protein_coding	+	chrZ:22100408-22190468	3.08426	1.00646	3.06448	1.61564	1	1	up	427181	-	CGNC:10987|Ensembl:ENSGALG00000014813	Z	-	homer scaffolding protein 1	gga04068(FoxO signaling pathway)
C6orf58	ENSGALG00000014823	protein_coding	-	chr3:58527004-58539770	3.36005	1.64489	2.04272	1.03049	1	1	up	421712	C3H6orf58	CGNC:51533|Ensembl:ENSGALG00000045522	3	-	chromosome 6 open reading frame 58
RPL37	ENSGALG00000014833	protein_coding	-	chrZ:12777215-12779845	437.155	189.992	2.30092	1.20221	0.00295	0.744161	up	427186	-	CGNC:11004|Ensembl:ENSGALG00000014833	Z	-	ribosomal protein L37	gga03010(Ribosome)	GO:0022625(cytosolic large ribosomal subunit)	GO:0019843(rRNA binding)//GO:0003723(RNA binding)//GO:0046872(metal ion binding)//GO:0003735(structural constituent of ribosome)	GO:0006412(translation)
SMPDL3A	ENSGALG00000014864	protein_coding	-	chr3:60658436-60671812	0.600619	0	inf	inf	1	1	up	776223	-	CGNC:57750|Ensembl:ENSGALG00000030275	3	-	sphingomyelin phosphodiesterase acid like 3A		GO:0005615(extracellular space)	GO:0004767(sphingomyelin phosphodiesterase activity)	GO:0006685(sphingomyelin catabolic process)
MOCS2	ENSGALG00000014906	protein_coding	-	chrZ:15791032-15794905	17.4652	1.18518	14.7363	3.8813	0.2514	0.994263	up	427199	-	CGNC:11063|Ensembl:ENSGALG00000014906	Z	-	molybdenum cofactor synthesis 2	gga00790(Folate biosynthesis)//gga01100(Metabolic pathways)//gga04122(Sulfur relay system)	GO:0019008(molybdopterin synthase complex)//GO:0005829(cytosol)	GO:0030366(molybdopterin synthase activity)	GO:0006777(Mo-molybdopterin cofactor biosynthetic process)
FST	ENSGALG00000014908	protein_coding	+	chrZ:15930690-15938408	0.393262	0	inf	inf	1	1	up	396119	-	CGNC:11065	Z	-	follistatin	gga04350(TGF-beta signaling pathway)	GO:0005615(extracellular space)	GO:0048185(activin binding)	GO:0051798(positive regulation of hair follicle development)//GO:1902873(negative regulation of horizontal cell localization)//GO:0010977(negative regulation of neuron projection development)//GO:0032926(negative regulation of activin receptor signaling pathway)//GO:0002244(hematopoietic progenitor cell differentiation)//GO:1902870(negative regulation of amacrine cell differentiation)//GO:1902876…
RAB28	ENSGALG00000014931	protein_coding	+	chr4:77025248-77086996	5.88356	2.05715	2.86005	1.51604	0.12205	0.994263	up	422839	-	CGNC:11083|Ensembl:ENSGALG00000014931	4	-	RAB28, member RAS oncogene family			GO:0003924(GTPase activity)//GO:0005525(GTP binding)//GO:0019003(GDP binding)	GO:1901998(toxin transport)
NSA2	ENSGALG00000014942	protein_coding	-	chrZ:24061464-24065315	33.9474	12.2147	2.77922	1.47468	0.01685	0.994263	up	427206	TINP1	CGNC:53017|Ensembl:ENSGALG00000014942	Z	-	NSA2, ribosome biogenesis homolog		GO:0005730(nucleolus)//GO:0030687(preribosome, large subunit precursor)		GO:0000460(maturation of 5.8S rRNA)//GO:0000470(maturation of LSU-rRNA)
COL10A1	ENSGALG00000014965	protein_coding	+	chr3:63337143-63456951	0.164619	0	inf	inf	1	1	up	100858979	-	CGNC:64139|Ensembl:ENSGALG00000014965	3	-	collagen, type X, alpha 1		GO:0005578(proteinaceous extracellular matrix)//GO:0005581(collagen trimer)//GO:0005576(extracellular region)//GO:0043235(receptor complex)//GO:0005938(cell cortex)
STX18	ENSGALG00000015012	protein_coding	-	chr4:78178488-78233602	8.60825	3.05302	2.81958	1.49548	0.09675	0.994263	up	422848	-	CGNC:11158|Ensembl:ENSGALG00000015012	4	-	syntaxin 18	gga04130(SNARE interactions in vesicular transport)//gga04145(Phagosome)	GO:0005622(intracellular)//GO:0016021(integral component of membrane)	GO:0005484(SNAP receptor activity)	GO:0061025(membrane fusion)//GO:0006886(intracellular protein transport)
MSX1	ENSGALG00000015013	protein_coding	+	chr4:78388176-78390740	3.73856	1.66352	2.24737	1.16824	0.3391	0.994263	up	396484	CHOX-7|GHOX-7|HOX-7	CGNC:11159|Ensembl:ENSGALG00000015013	4	-	msh homeobox 1		GO:0005634(nucleus)	GO:0043565(sequence-specific DNA binding)	GO:0030509(BMP signaling pathway)//GO:0001503(ossification)//GO:0007275(multicellular organism development)
TRAF3IP2	ENSGALG00000015026	protein_coding	+	chr3:65438149-65463769	0.442403	0	inf	inf	1	1	up	421752	C6ORF4	CGNC:11172|Ensembl:ENSGALG00000015026	3	-	TRAF3 interacting protein 2			GO:0005102(receptor binding)	GO:0043123(positive regulation of I-kappaB kinase/NF-kappaB signaling)//GO:0001783(B cell apoptotic process)//GO:0048305(immunoglobulin secretion)//GO:0006959(humoral immune response)//GO:0002230(positive regulation of defense response to virus by host)//GO:0007165(signal transduction)
GTF3C6	ENSGALG00000015044	protein_coding	-	chr3:65709192-65726791	2.79991	1.73531e-06	1.61354e+06	20.6218	1	1	up	421754	-	CGNC:11188|Ensembl:ENSGALG00000015044	3	-	general transcription factor IIIC subunit 6		GO:0016604(nuclear body)//GO:0000127(transcription factor TFIIIC complex)	GO:0003677(DNA binding)	GO:0006383(transcription from RNA polymerase III promoter)
WASF1	ENSGALG00000015066	protein_coding	+	chr3:66123599-66154746	0.981358	0	inf	inf	1	1	up	421761	-	CGNC:11206|Ensembl:ENSGALG00000015066	3	-	WAS protein family member 1	gga04520(Adherens junction)//gga04810(Regulation of actin cytoskeleton)//gga05132(Salmonella infection)	GO:0005856(cytoskeleton)//GO:0031209(SCAR complex)	GO:0048365(Rac GTPase binding)//GO:0003779(actin binding)//GO:0032403(protein complex binding)	GO:0030036(actin cytoskeleton organization)//GO:2000601(positive regulation of Arp2/3 complex-mediated actin nucleation)//GO:0016601(Rac protein signal transduction)
-	ENSGALG00000015076	protein_coding	+	chr2:102944939-102948608	0.403613	0	inf	inf	1	1	up
LSAMP	ENSGALG00000015087	protein_coding	+	chr1:81373014-81656000	0.216372	0	inf	inf	1	1	up	395687	chLAMP	CGNC:49431|Ensembl:ENSGALG00000040620	1	-	limbic system-associated membrane protein
-	ENSGALG00000015140	protein_coding	-	chr2:105634158-105655438	1.15327	0	inf	inf	1	1	up
GTPBP8	ENSGALG00000015190	protein_coding	-	chr1:82808106-82811533	5.044	1.23457	4.08561	2.03055	0.09845	0.994263	up	418366	-	CGNC:11302|Ensembl:ENSGALG00000015190	1	-	GTP binding protein 8 (putative)
ATG3	ENSGALG00000015204	protein_coding	+	chr1:82979649-83006257	5.29941	2.20309	2.40544	1.2663	0.03855	0.994263	up	418369	APG3L	CGNC:11313|Ensembl:ENSGALG00000015204	1	-	autophagy related 3	gga04140(Regulation of autophagy)	GO:0000153(cytoplasmic ubiquitin ligase complex)//GO:0005829(cytosol)	GO:0019777(Atg12 transferase activity)//GO:0019776(Atg8 ligase activity)//GO:0019899(enzyme binding)	GO:0050765(negative regulation of phagocytosis)//GO:1902017(regulation of cilium assembly)//GO:0043653(mitochondrial fragmentation involved in apoptotic process)//GO:0016567(protein ubiquitination)//GO:0000045(autophagosome assembly)//GO:0044804(autophagy of nucleus)//GO:0015031(protein transport)//GO:0000422(autophagy of mitochondrion)
CCDC181	ENSGALG00000015221	protein_coding	+	chr1:83070839-83080854	0.717737	0.146411	4.9022	2.29343	1	1	up	418370	C1H1ORF114|C1orf114	CGNC:11327|Ensembl:ENSGALG00000015221	1	-	coiled-coil domain containing 181		GO:0036126(sperm flagellum)//GO:0002177(manchette)	GO:0008017(microtubule binding)
CPOX	ENSGALG00000015240	protein_coding	-	chr1:83561889-83573845	1.6619	0.610303	2.72306	1.44523	1	1	up	418377	-	CGNC:11339|Ensembl:ENSGALG00000015240	1	-	coproporphyrinogen oxidase	gga00860(Porphyrin and chlorophyll metabolism)//gga01100(Metabolic pathways)	GO:0016020(membrane)//GO:0005739(mitochondrion)//GO:0005829(cytosol)	GO:0004109(coproporphyrinogen oxidase activity)//GO:0005212(structural constituent of eye lens)//GO:0042803(protein homodimerization activity)	GO:0055114(oxidation-reduction process)//GO:0006783(heme biosynthetic process)
TMEM30C	ENSGALG00000015263	protein_coding	-	chr1:83989236-83996981	1.33834	0.363866	3.6781	1.87896	1	1	up
SESN1	ENSGALG00000015286	protein_coding	+	chr3:66547544-66556746	4.69357	2.12766	2.20598	1.14142	0.14485	0.994263	up	421766	-	CGNC:11380|Ensembl:ENSGALG00000015286	3	-	sestrin 1	gga04115(p53 signaling pathway)	GO:0005634(nucleus)		GO:1901031(regulation of response to reactive oxygen species)
ARMC2	ENSGALG00000015289	protein_coding	-	chr3:66560204-66617959	1.32499	0.27029	4.90213	2.29341	1	1	up	421767	-	CGNC:11383|Ensembl:ENSGALG00000015289	3	-	armadillo repeat containing 2
IMPG2	ENSGALG00000015322	protein_coding	-	chr1:84610639-84660808	0.609169	0	inf	inf	1	1	up	418393	-	CGNC:11408|Ensembl:ENSGALG00000015322	1	-	interphotoreceptor matrix proteoglycan 2		GO:0016021(integral component of membrane)//GO:0033165(interphotoreceptor matrix)//GO:0043235(receptor complex)	GO:0005201(extracellular matrix structural constituent)//GO:0008201(heparin binding)//GO:0005540(hyaluronic acid binding)	GO:0007601(visual perception)
RTN4IP1	ENSGALG00000015343	protein_coding	+	chr3:67523138-67543176	3.91945	0.959131	4.08646	2.03085	0.2242	0.994263	up	421782	-	CGNC:11427|Ensembl:ENSGALG00000015343	3	-	reticulon 4 interacting protein 1		GO:0005741(mitochondrial outer membrane)	GO:0016491(oxidoreductase activity)//GO:0008270(zinc ion binding)	GO:0055114(oxidation-reduction process)
rbf	ENSGALG00000015372	protein_coding	+	chrZ:53307242-53309110	73.0038	29.6759	2.46004	1.29868	0.0847	0.994263	up
TAGLN3	ENSGALG00000015379	protein_coding	+	chr1:87951756-87962695	0.425573	0	inf	inf	1	1	up	418420	-	CGNC:11455|Ensembl:ENSGALG00000015379	1	-	transgelin 3		GO:0005634(nucleus)//GO:0043209(myelin sheath)	GO:0051015(actin filament binding)	GO:0000122(negative regulation of transcription from RNA polymerase II promoter)
ADPRH	ENSGALG00000015473	protein_coding	-	chr1:91610620-91612619	17.9532	6.70855	2.67617	1.42017	0.1059	0.994263	up	418452	-	CGNC:50773|Ensembl:ENSGALG00000015473	1	-	ADP-ribosylarginine hydrolase			GO:0003875(ADP-ribosylarginine hydrolase activity)//GO:0030955(potassium ion binding)//GO:0000287(magnesium ion binding)	GO:0051725(protein de-ADP-ribosylation)
CYP7B1	ENSGALG00000015512	protein_coding	-	chr2:114093262-114114645	0.885012	0	inf	inf	1	1	up	420164	-	CGNC:51197|Ensembl:ENSGALG00000029435	2	-	cytochrome P450 family 7 subfamily B member 1	gga00120(Primary bile acid biosynthesis)//gga00140(Steroid hormone biosynthesis)	GO:0016021(integral component of membrane)//GO:0005789(endoplasmic reticulum membrane)	GO:0004497(monooxygenase activity)//GO:0005506(iron ion binding)//GO:0016705(oxidoreductase activity, acting on paired donors, with incorporation or reduction of molecular oxygen)//GO:0020037(heme binding)	GO:0055114(oxidation-reduction process)
-	ENSGALG00000015519	protein_coding	-	chr1:96240666-96396977	1.2973	0.244308	5.3101	2.40874	1	1	up
TMEM246	ENSGALG00000015545	protein_coding	+	chrZ:64939173-64940361	1.22175	0	inf	inf	1	1	up	427309	C9ORF125|CZH9orf125	CGNC:11591|Ensembl:ENSGALG00000015545	Z	-	transmembrane protein 246		GO:0016021(integral component of membrane)
CPA6	ENSGALG00000015558	protein_coding	-	chr2:115185936-115273389	0.683368	0.139402	4.90217	2.29342	1	1	up	420171	-	CGNC:51199|Ensembl:ENSGALG00000041918	2	-	carboxypeptidase A6			GO:0008270(zinc ion binding)//GO:0004181(metallocarboxypeptidase activity)	GO:0006508(proteolysis)
ABLIM2	ENSGALG00000015559	protein_coding	-	chr4:80230320-80370428	0.189154	0	inf	inf	1	1	up	422866	-	CGNC:11602|Ensembl:ENSGALG00000043448	4	-	actin binding LIM protein family member 2			GO:0046872(metal ion binding)//GO:0003779(actin binding)	GO:0030036(actin cytoskeleton organization)//GO:0006351(transcription, DNA-templated)
FHL5	ENSGALG00000015573	protein_coding	-	chr3:72192773-72220889	21.6659	10.8316	2.00025	1.00018	0.0268	0.994263	up	421803	-	CGNC:11609|Ensembl:ENSGALG00000015573	3	-	four and a half LIM domains 5			GO:0046872(metal ion binding)//GO:0003713(transcription coactivator activity)	GO:0045944(positive regulation of transcription from RNA polymerase II promoter)
HMX1	ENSGALG00000015600	protein_coding	-	chr4:80975026-80978215	3.98641	1.21997	3.26764	1.70825	0.21095	0.994263	up	396546	GH6	CGNC:11629|Ensembl:ENSGALG00000042062	4	-	H6 family homeobox 1		GO:0005634(nucleus)	GO:0043565(sequence-specific DNA binding)//GO:0003677(DNA binding)	GO:0007275(multicellular organism development)//GO:0045892(negative regulation of transcription, DNA-templated)//GO:0006351(transcription, DNA-templated)
PALM2	ENSGALG00000015655	protein_coding	+	chrZ:65239372-65593260	0.962259	0.196273	4.90264	2.29356	1	1	up
-	ENSGALG00000015685	protein_coding	-	chr4:82161952-82209841	0.501983	0	inf	inf	1	1	up
PKIA	ENSGALG00000015732	protein_coding	+	chr2:119973141-120009255	2.60842	0.531721	4.9056	2.29443	1	1	up	396333	PKI	CGNC:11733|Ensembl:ENSGALG00000035525	2	-	protein kinase (cAMP-dependent, catalytic) inhibitor alpha		GO:0005634(nucleus)//GO:0005737(cytoplasm)	GO:0004862(cAMP-dependent protein kinase inhibitor activity)	GO:2000480(negative regulation of cAMP-dependent protein kinase activity)
LYRM2	ENSGALG00000015762	protein_coding	+	chr3:74947910-74950516	1.44303	0.588256	2.45306	1.29458	1	1	up	421812	-	CGNC:11755|Ensembl:ENSGALG00000015762	3	-	LYR motif containing 2		GO:0005739(mitochondrion)
RALYL	ENSGALG00000015797	protein_coding	+	chr2:122266769-122359251	1.29797	0	inf	inf	1	1	up	420203	-	CGNC:11784|Ensembl:ENSGALG00000036938	2	-	RALY RNA binding protein-like			GO:0003723(RNA binding)
C6ORF162	ENSGALG00000015812	protein_coding	-	chr3:75912084-75914718	2.10844	0	inf	inf	1	1	up
MAP3K7CL	ENSGALG00000015822	protein_coding	+	chr1:103363913-103393291	1.49375	0.406237	3.67703	1.87854	1	1	up	418487	C1H21orf7|C21ORF7|HC21ORF7|TAK1L|TAKL|TAKL-1|TAKL-2|TAKL-4	CGNC:11806|Ensembl:ENSGALG00000015822	1	-	MAP3K7 C-terminal like		GO:0005622(intracellular)//GO:0005634(nucleus)//GO:0005829(cytosol)	GO:0004709(MAP kinase kinase kinase activity)	GO:0000165(MAPK cascade)//GO:0000186(activation of MAPKK activity)
TBX18	ENSGALG00000015834	protein_coding	+	chr3:76646413-76672046	0.602289	0.122299	4.92475	2.30005	1	1	up	395104	-	CGNC:49172|Ensembl:ENSGALG00000032789	3	-	T-box 18		GO:0005634(nucleus)	GO:0003677(DNA binding)//GO:0003700(transcription factor activity, sequence-specific DNA binding)	GO:0006351(transcription, DNA-templated)//GO:0006355(regulation of transcription, DNA-templated)
GRIK1	ENSGALG00000015835	protein_coding	-	chr1:103488817-103564194	0.139878	0	inf	inf	1	1	up	418489	-	CGNC:11815|Ensembl:ENSGALG00000015835	1	-	glutamate ionotropic receptor kainate type subunit 1	gga04080(Neuroactive ligand-receptor interaction)	GO:0016021(integral component of membrane)//GO:0030054(cell junction)//GO:0045211(postsynaptic membrane)	GO:0004970(ionotropic glutamate receptor activity)//GO:0005234(extracellular-glutamate-gated ion channel activity)	GO:0035235(ionotropic glutamate receptor signaling pathway)//GO:0060079(excitatory postsynaptic potential)//GO:0034220(ion transmembrane transport)
SNAP91	ENSGALG00000015846	protein_coding	+	chr3:77046812-77117276	0.966265	0.270595	3.57088	1.83628	1	1	up	428635	-	CGNC:11823|Ensembl:ENSGALG00000015846	3	-	synaptosome associated protein 91		GO:0030136(clathrin-coated vesicle)	GO:0030276(clathrin binding)//GO:0005545(1-phosphatidylinositol binding)	GO:0048268(clathrin coat assembly)
ME1	ENSGALG00000015849	protein_coding	+	chr3:77166448-77331527	0.160898	0.0656523	2.45076	1.29323	1	1	up	374189	NADP-ME	CGNC:49075|Ensembl:ENSGALG00000015849	3	-	malic enzyme 1	gga00620(Pyruvate metabolism)//gga01100(Metabolic pathways)//gga01200(Carbon metabolism)	GO:0005739(mitochondrion)//GO:0005737(cytoplasm)	GO:0004471(malate dehydrogenase (decarboxylating) (NAD+) activity)//GO:0008948(oxaloacetate decarboxylase activity)//GO:0004473(malate dehydrogenase (decarboxylating) (NADP+) activity)//GO:0051287(NAD binding)//GO:0030145(manganese ion binding)	GO:0055114(oxidation-reduction process)//GO:0006108(malate metabolic process)//GO:1902031(regulation of NADP metabolic process)//GO:0051262(protein tetramerization)
UBE3D	ENSGALG00000015860	protein_coding	+	chr3:77404160-77449989	2.12231	0.865861	2.4511	1.29343	1	1	up	421843	C6orf157|H10BH|UBE2CBP|YJR141W	CGNC:11832|Ensembl:ENSGALG00000015860	3	-	ubiquitin protein ligase E3D		GO:0000151(ubiquitin ligase complex)	GO:0030332(cyclin binding)//GO:0061630(ubiquitin protein ligase activity)//GO:0044390(ubiquitin-like protein conjugating enzyme binding)	GO:0000209(protein polyubiquitination)//GO:0006513(protein monoubiquitination)//GO:0051865(protein autoubiquitination)
-	ENSGALG00000015905	protein_coding	+	chr2:124071733-124090805	0.562276	0.229362	2.45147	1.29365	1	1	up
CD109	ENSGALG00000015910	protein_coding	-	chr3:80775680-80855396	2.15525	0.639563	3.36986	1.75269	1	1	up	421862	-	CGNC:11871|Ensembl:ENSGALG00000015910	3	-	CD109 molecule		GO:0005615(extracellular space)//GO:0009986(cell surface)	GO:0050431(transforming growth factor beta binding)//GO:0004866(endopeptidase inhibitor activity)	GO:0061045(negative regulation of wound healing)//GO:0010839(negative regulation of keratinocyte proliferation)//GO:0072675(osteoclast fusion)//GO:0030512(negative regulation of transforming growth factor beta receptor signaling pathway)//GO:0001933(negative regulation of protein phosphorylation)//GO:0045616(regulation of keratinocyte differentiation)//GO:0010951(negative regulation of endopeptid…
EGR4	ENSGALG00000016086	protein_coding	+	chr4:89193870-89196259	0.421759	0	inf	inf	1	1	up	422950	-	CGNC:12020|Ensembl:ENSGALG00000016086	4	-	early growth response 4			GO:0043565(sequence-specific DNA binding)	GO:0045944(positive regulation of transcription from RNA polymerase II promoter)
TMEM74	ENSGALG00000016100	protein_coding	-	chr2:131623658-131624609	1.12555	0	inf	inf	1	1	up	100858101	-	CGNC:64973	2	-	transmembrane protein 74		GO:0016021(integral component of membrane)		GO:0006914(autophagy)
LY6E	ENSGALG00000016152	protein_coding	-	chr2:147927175-147933270	2.35725	0	inf	inf	1	1	up	395550	SCA-2|SCA2	CGNC:49371|Ensembl:ENSGALG00000041621	2	-	lymphocyte antigen 6 family member E		GO:0016021(integral component of membrane)//GO:0031225(anchored component of membrane)//GO:0005886(plasma membrane)//GO:0009986(cell surface)		GO:0002320(lymphoid progenitor cell differentiation)//GO:0008283(cell proliferation)
TSNARE1	ENSGALG00000016161	protein_coding	-	chr2:146571926-146986116	1.78249	0	inf	inf	1	1	up	420304	-	CGNC:12081|Ensembl:ENSGALG00000037014	2	-	t-SNARE domain containing 1		GO:0016020(membrane)		GO:0016192(vesicle-mediated transport)
TMPRSS3	ENSGALG00000016169	protein_coding	-	chr1:108738272-108751340	0.600018	0	inf	inf	1	1	up	427988	-	CGNC:12088|Ensembl:ENSGALG00000016169	1	-	transmembrane protease, serine 3
RPLP1	ENSGALG00000016172	protein_coding	+	chr2:145289504-145290656	624.592	298.802	2.09031	1.06372	0.00865	0.994263	up	396262	-	CGNC:49724|Ensembl:ENSGALG00000030878	2	-	ribosomal protein lateral stalk subunit P1	gga03010(Ribosome)	GO:0070062(extracellular exosome)//GO:0005925(focal adhesion)//GO:0022625(cytosolic large ribosomal subunit)	GO:0003735(structural constituent of ribosome)//GO:0030295(protein kinase activator activity)	GO:0006414(translational elongation)//GO:0045860(positive regulation of protein kinase activity)//GO:0032147(activation of protein kinase activity)//GO:0002181(cytoplasmic translation)
ST3GAL1	ENSGALG00000016210	protein_coding	-	chr2:141665330-141689879	0.246543	0	inf	inf	1	1	up	396140	-	CGNC:12118|Ensembl:ENSGALG00000037773	2	-	ST3 beta-galactoside alpha-2,3-sialyltransferase 1	gga00512(Mucin type O-Glycan biosynthesis)//gga00533(Glycosaminoglycan biosynthesis - keratan sulfate)//gga00603(Glycosphingolipid biosynthesis - globo series)//gga00604(Glycosphingolipid biosynthesis - ganglio series)//gga01100(Metabolic pathways)	GO:0016021(integral component of membrane)//GO:0070062(extracellular exosome)//GO:0000139(Golgi membrane)//GO:0032580(Golgi cisterna membrane)	GO:0003836(beta-galactoside (CMP) alpha-2,3-sialyltransferase activity)	GO:0006468(protein phosphorylation)//GO:0009311(oligosaccharide metabolic process)//GO:0018279(protein N-linked glycosylation via asparagine)//GO:0006054(N-acetylneuraminate metabolic process)//GO:0006487(protein N-linked glycosylation)//GO:0097503(sialylation)
-	ENSGALG00000016214	protein_coding	+	chr1:110031104-110034907	3.46341	0	inf	inf	1	1	up
-	ENSGALG00000016251	protein_coding	-	chr1:112106634-112126203	0.245206	0	inf	inf	1	1	up
RPGR	ENSGALG00000016255	protein_coding	+	chr1:112266515-112364076	0.778055	0.244219	3.18588	1.67169	1	1	up	418578	-	CGNC:12151|Ensembl:ENSGALG00000036284	1	-	retinitis pigmentosa GTPase regulator				GO:0060271(cilium assembly)//GO:0007601(visual perception)
COL21A1	ENSGALG00000016292	protein_coding	+	chr3:86631542-86708701	0.333408	0	inf	inf	1	1	up	421885	-	CGNC:12183|Ensembl:ENSGALG00000016292	3	-	collagen type XXI alpha 1 chain		GO:0031012(extracellular matrix)//GO:0005829(cytosol)
FBXO9	ENSGALG00000016320	protein_coding	-	chr3:87729800-87747291	10.3606	4.16198	2.48933	1.31576	0.02905	0.994263	up	421895	-	CGNC:12207|Ensembl:ENSGALG00000016320	3	-	F-box protein 9
APOO	ENSGALG00000016347	protein_coding	+	chr1:117716972-117747598	54.4326	21.109	2.57864	1.36661	0.0169	0.994263	up	418599	-	CGNC:12230|Ensembl:ENSGALG00000016345	1	-	apolipoprotein O
DLGAP2	ENSGALG00000016352	protein_coding	-	chr3:90624219-91037359	1.4499	0.322675	4.49338	2.1678	1	1	up	421903	-	CGNC:12235	3	-	DLG associated protein 2
ERICH1	ENSGALG00000016355	protein_coding	+	chr3:91073813-91168563	1.29911	0.471145	2.75736	1.46329	1	1	up	421904	-	CGNC:12237|Ensembl:ENSGALG00000031021	3	-	glutamate rich 1
FAM150B	ENSGALG00000016364	protein_coding	-	chr3:91537817-91550506	0.957326	0	inf	inf	1	1	up	421910	-	CGNC:51560	3	-	family with sequence similarity 150 member B			GO:0030971(receptor tyrosine kinase binding)//GO:0030298(receptor signaling protein tyrosine kinase activator activity)	GO:0061098(positive regulation of protein tyrosine kinase activity)
col14A1	ENSGALG00000016411	protein_coding	+	chr2:136370295-136490384	0.140621	0.0573634	2.45141	1.29361	1	1	up	396276	COL14	CGNC:12285|Ensembl:ENSGALG00000037675	2	-	collagen type XIV alpha 1 chain		GO:0005578(proteinaceous extracellular matrix)//GO:0005581(collagen trimer)		GO:0007155(cell adhesion)
MBOAT2	ENSGALG00000016412	protein_coding	-	chr3:95513203-95603900	1.01991	0.277405	3.67662	1.87838	1	1	up	421925	OACT2	CGNC:51566|Ensembl:ENSGALG00000016412	3	-	membrane bound O-acyltransferase domain containing 2	gga00561(Glycerolipid metabolism)//gga00564(Glycerophospholipid metabolism)//gga01100(Metabolic pathways)
ITGB1BP1	ENSGALG00000016421	protein_coding	-	chr3:95754733-95761336	9.83936	2.2921	4.29274	2.1019	0.14775	0.994263	up	421928	-	CGNC:12293|Ensembl:ENSGALG00000016421	3	-	integrin subunit beta 1 binding protein 1		GO:0005886(plasma membrane)//GO:0070062(extracellular exosome)//GO:0030027(lamellipodium)//GO:0048471(perinuclear region of cytoplasm)//GO:0001726(ruffle)//GO:0005829(cytosol)//GO:0005654(nucleoplasm)//GO:0005856(cytoskeleton)	GO:0019901(protein kinase binding)//GO:0005092(GDP-dissociation inhibitor activity)//GO:0005178(integrin binding)//GO:0008565(protein transporter activity)	GO:0043113(receptor clustering)//GO:0010764(negative regulation of fibroblast migration)//GO:0008285(negative regulation of cell proliferation)//GO:0035148(tube formation)//GO:0032091(negative regulation of protein binding)//GO:0035924(cellular response to vascular endothelial growth factor stimulus)//GO:0090315(negative regulation of protein targeting to membrane)//GO:0010595(positive regulation…
FAM84A	ENSGALG00000016459	protein_coding	+	chr3:98116393-98118503	0.938084	0	inf	inf	1	1	up	421946	-	CGNC:12322|Ensembl:ENSGALG00000016459	3	-	family with sequence similarity 84 member A
TP53I3	ENSGALG00000016502	protein_coding	-	chr3:103877868-103881489	2.24039	0.365468	6.13018	2.61593	1	1	up	421977	-	CGNC:12358|Ensembl:ENSGALG00000016502	3	-	tumor protein p53 inducible protein 3	gga04115(p53 signaling pathway)	GO:0070062(extracellular exosome)	GO:0003960(NADPH:quinone reductase activity)//GO:0048038(quinone binding)//GO:0070402(NADPH binding)//GO:0042803(protein homodimerization activity)	GO:0006739(NADP metabolic process)//GO:0055114(oxidation-reduction process)
FNDC4	ENSGALG00000016507	protein_coding	+	chr3:104008232-104014124	1.6473	0	inf	inf	1	1	up	421981	-	CGNC:12363|Ensembl:ENSGALG00000016507	3	-	fibronectin type III domain containing 4		GO:0005783(endoplasmic reticulum)//GO:0005886(plasma membrane)//GO:0016021(integral component of membrane)
AGBL5	ENSGALG00000016520	protein_coding	+	chr3:104125581-104133092	2.56181	1.19447	2.14474	1.1008	1	1	up	770678	-	CGNC:12374	3	-	ATP/GTP binding protein like 5
PTK2B	ENSGALG00000016564	protein_coding	+	chr3:104676809-104704881	0.136104	0	inf	inf	1	1	up	421998	-	CGNC:12407|Ensembl:ENSGALG00000016564	3	-	protein tyrosine kinase 2 beta	gga04020(Calcium signaling pathway)//gga04912(GnRH signaling pathway)	GO:0030027(lamellipodium)//GO:0048471(perinuclear region of cytoplasm)//GO:0005634(nucleus)//GO:0031234(extrinsic component of cytoplasmic side of plasma membrane)//GO:0005856(cytoskeleton)//GO:0005925(focal adhesion)	GO:0005102(receptor binding)//GO:0004715(non-membrane spanning protein tyrosine kinase activity)//GO:0005524(ATP binding)//GO:0004871(signal transducer activity)	GO:0010976(positive regulation of neuron projection development)//GO:2000538(positive regulation of B cell chemotaxis)//GO:0002315(marginal zone B cell differentiation)//GO:0010752(regulation of cGMP-mediated signaling)//GO:0045638(negative regulation of myeloid cell differentiation)//GO:0050848(regulation of calcium-mediated signaling)//GO:0008285(negative regulation of cell proliferation)//GO:0…
TCEANC	ENSGALG00000016581	protein_coding	-	chr1:122440982-122442062	2.28315	1.11732	2.04343	1.03099	1	1	up	418636	-	CGNC:50813|Ensembl:ENSGALG00000016581	1	-	transcription elongation factor A N-terminal and central domain containing		GO:0005634(nucleus)		GO:0006351(transcription, DNA-templated)
-	ENSGALG00000016648	protein_coding	+	chr1:127828156-127842611	0.674984	0	inf	inf	1	1	up
XKR5	ENSGALG00000016672	protein_coding	+	chr3:107105044-107109160	0.658819	0	inf	inf	1	1	up	422039	-	CGNC:51599|Ensembl:ENSGALG00000045634	3	-	XK related 5
TFAP2B	ENSGALG00000016680	protein_coding	-	chr3:107846264-107873218	11.8313	4.70228	2.51607	1.33117	0.0617	0.994263	up	395713	-	CGNC:12500|Ensembl:ENSGALG00000016680	3	-	transcription factor AP-2 beta		GO:0005634(nucleus)	GO:0046982(protein heterodimerization activity)//GO:0043027(cysteine-type endopeptidase inhibitor activity involved in apoptotic process)//GO:0001105(RNA polymerase II transcription coactivator activity)//GO:0042803(protein homodimerization activity)//GO:0000981(RNA polymerase II transcription factor activity, sequence-specific DNA binding)//GO:0000979(RNA polymerase II core promoter sequence-spe…	GO:0097276(cellular creatinine homeostasis)//GO:0010842(retina layer formation)//GO:0055078(sodium ion homeostasis)//GO:0072017(distal tubule development)//GO:0048856(anatomical structure development)//GO:0035136(forelimb morphogenesis)//GO:0003091(renal water homeostasis)//GO:0097277(cellular urea homeostasis)//GO:0008285(negative regulation of cell proliferation)//GO:0000122(negative regulation…
RCAN2	ENSGALG00000016709	protein_coding	-	chr3:109338624-109369202	1.93154	0.524994	3.67917	1.87938	1	1	up	422057	-	CGNC:12525|Ensembl:ENSGALG00000016709	3	-	regulator of calcineurin 2		GO:0005737(cytoplasm)	GO:0003676(nucleic acid binding)//GO:0008597(calcium-dependent protein serine/threonine phosphatase regulator activity)	GO:0050790(regulation of catalytic activity)//GO:0070884(regulation of calcineurin-NFAT signaling cascade)//GO:0019722(calcium-mediated signaling)
PLCXD1	ENSGALG00000016721	protein_coding	-	chr1:129423876-129442045	0.512526	0	inf	inf	1	1	up	418673	-	CGNC:12536|Ensembl:ENSGALG00000016721	1	-	phosphatidylinositol specific phospholipase C X domain containing 1			GO:0008081(phosphoric diester hydrolase activity)	GO:0006629(lipid metabolic process)
RPL31	ENSGALG00000016775	protein_coding	+	chr1:132725775-132731147	91.9623	39.6793	2.31765	1.21266	0.00605	0.994263	up	418710	-	CGNC:50833|Ensembl:ENSGALG00000016775	1	-	ribosomal protein L31	gga03010(Ribosome)	GO:0016020(membrane)//GO:0070062(extracellular exosome)//GO:0005925(focal adhesion)//GO:0022625(cytosolic large ribosomal subunit)	GO:0003723(RNA binding)//GO:0003735(structural constituent of ribosome)	GO:0002181(cytoplasmic translation)
CARS2	ENSGALG00000016847	protein_coding	-	chr1:138505079-138538107	5.39318	2.30482	2.33995	1.22648	0.1661	0.994263	up	418757	-	CGNC:12641|Ensembl:ENSGALG00000016847	1	-	cysteinyl-tRNA synthetase 2, mitochondrial (putative)	gga00970(Aminoacyl-tRNA biosynthesis)
ANKRD10	ENSGALG00000016850	protein_coding	-	chr1:138575360-138610423	6.48278	2.80063	2.31476	1.21086	0.0481	0.994263	up	418760	-	CGNC:12643|Ensembl:ENSGALG00000030125	1	-	ankyrin repeat domain 10				GO:0060828(regulation of canonical Wnt signaling pathway)
TEX30	ENSGALG00000016863	protein_coding	-	chr1:142057710-142064431	4.08854	1.42951	2.86011	1.51607	0.21065	0.994263	up	418767	C13orf27|C1H13ORF27	CGNC:12655|Ensembl:ENSGALG00000016863	1	-	testis expressed 30
ITGBL1	ENSGALG00000016867	protein_coding	-	chr1:142614260-142752083	0.564711	0.153591	3.67672	1.87842	1	1	up	418769	-	CGNC:12659|Ensembl:ENSGALG00000016867	1	-	integrin subunit beta like 1
TGDS	ENSGALG00000016898	protein_coding	+	chr1:145692789-145705488	7.17614	3.17854	2.25768	1.17484	0.10065	0.994263	up	418793	-	CGNC:12682|Ensembl:ENSGALG00000016898	1	-	TDP-glucose 4,6-dehydratase	gga01100(Metabolic pathways)
DNAJC15	ENSGALG00000016965	protein_coding	+	chr1:166031301-166055788	17.7758	5.23524	3.39542	1.76359	0.04265	0.994263	up	418838	DNAJD1	CGNC:12733|Ensembl:ENSGALG00000016965	1	-	DnaJ heat shock protein family (Hsp40) member C15		GO:0005743(mitochondrial inner membrane)		GO:0019216(regulation of lipid metabolic process)//GO:0031333(negative regulation of protein complex assembly)//GO:1902957(negative regulation of mitochondrial electron transport, NADH to ubiquinone)//GO:0009267(cellular response to starvation)
LRCH1	ENSGALG00000016990	protein_coding	+	chr1:167496660-167608713	2.01435	0.438329	4.59553	2.20023	1	1	up	418855	-	CGNC:12752|Ensembl:ENSGALG00000016990	1	-	leucine rich repeats and calponin homology domain containing 1		GO:0005886(plasma membrane)		GO:0007165(signal transduction)
KCNRG	ENSGALG00000017012	protein_coding	+	chr1:168673887-168676904	3.95856	0.358754	11.0342	3.46391	0.2548	0.994263	up	418873	-	CGNC:12773|Ensembl:ENSGALG00000017012	1	-	potassium channel regulator		GO:0005783(endoplasmic reticulum)	GO:0042802(identical protein binding)	GO:1902260(negative regulation of delayed rectifier potassium channel activity)//GO:0051260(protein homooligomerization)
N4BP2L1	ENSGALG00000017072	protein_coding	+	chr1:173808325-173820489	3.12365	1.37229	2.27624	1.18665	1	1	up	418914	-	CGNC:50878|Ensembl:ENSGALG00000017072	1	-	NEDD4 binding protein 2 like 1
MTUS2	ENSGALG00000017086	protein_coding	-	chr1:174734825-174993334	0.273846	0	inf	inf	1	1	up	418923	-	CGNC:12833	1	-	microtubule associated tumor suppressor candidate 2
ATP8A2	ENSGALG00000017106	protein_coding	+	chr1:175972297-176281155	0.721846	0	inf	inf	1	1	up	418936	-	CGNC:12851|Ensembl:ENSGALG00000017106	1	-	ATPase phospholipid transporting 8A2		GO:0005654(nucleoplasm)//GO:0005886(plasma membrane)//GO:0005794(Golgi apparatus)//GO:0016021(integral component of membrane)//GO:0005768(endosome)	GO:0005524(ATP binding)//GO:0000287(magnesium ion binding)//GO:0004012(phospholipid-translocating ATPase activity)	GO:0007409(axonogenesis)//GO:0010976(positive regulation of neuron projection development)//GO:0007568(aging)//GO:0042755(eating behavior)//GO:0045332(phospholipid translocation)//GO:0010842(retina layer formation)//GO:0010996(response to auditory stimulus)//GO:0048666(neuron development)//GO:0060052(neurofilament cytoskeleton organization)//GO:0042472(inner ear morphogenesis)//GO:0061092(positiv…
CRYL1	ENSGALG00000017135	protein_coding	+	chr1:178104768-178156860	0.416624	0	inf	inf	1	1	up	418953	-	CGNC:12872|Ensembl:ENSGALG00000017135	1	-	crystallin lambda 1	gga00040(Pentose and glucuronate interconversions)//gga01100(Metabolic pathways)	GO:0016021(integral component of membrane)//GO:0070062(extracellular exosome)	GO:0070403(NAD+ binding)//GO:0050104(L-gulonate 3-dehydrogenase activity)//GO:0042803(protein homodimerization activity)//GO:0003857(3-hydroxyacyl-CoA dehydrogenase activity)	GO:0055114(oxidation-reduction process)//GO:0006631(fatty acid metabolic process)
SLC35F2	ENSGALG00000017167	protein_coding	+	chr1:179678151-179696191	4.30356	2.13742	2.01344	1.00966	0.19255	0.994263	up	418970	-	CGNC:12894|Ensembl:ENSGALG00000017167	1	-	solute carrier family 35 member F2		GO:0016021(integral component of membrane)		GO:0006810(transport)
MMP13	ENSGALG00000017183	protein_coding	+	chr1:181647082-181654718	0.150655	0	inf	inf	1	1	up	395683	MMP-13	CGNC:49430|Ensembl:ENSGALG00000017183	1	-	matrix metallopeptidase 13		GO:0031012(extracellular matrix)	GO:0005518(collagen binding)//GO:0008270(zinc ion binding)//GO:0004222(metalloendopeptidase activity)//GO:0005509(calcium ion binding)	GO:0044267(cellular protein metabolic process)//GO:0022617(extracellular matrix disassembly)//GO:0001958(endochondral ossification)//GO:0003417(growth plate cartilage development)//GO:0030574(collagen catabolic process)//GO:0006508(proteolysis)//GO:0030282(bone mineralization)
FAR-2	ENSGALG00000017197	protein_coding	-	chr1:182715564-183138508	0.124405	0	inf	inf	1	1	up
KCTD14	ENSGALG00000017266	protein_coding	+	chr1:192082577-192085935	0.4781	0	inf	inf	1	1	up	419029	-	CGNC:12970|Ensembl:ENSGALG00000017266	1	-	potassium channel tetramerization domain containing 14				GO:0051260(protein homooligomerization)
ARHGEF5	ENSGALG00000017276	protein_coding	-	chr1:74562444-74577343	0.175789	0	inf	inf	1	1	up	419033	ARHGEF19	CGNC:12978	1	-	Rho guanine nucleotide exchange factor 5
P2RY2	ENSGALG00000017328	protein_coding	+	chr1:194466867-194469256	1.51818	0	inf	inf	1	1	up	428108	-	CGNC:13018	1	-	purinergic receptor P2Y2	gga04080(Neuroactive ligand-receptor interaction)	GO:0016021(integral component of membrane)	GO:0045028(G-protein coupled purinergic nucleotide receptor activity)	GO:0097746(regulation of blood vessel diameter)//GO:0007200(phospholipase C-activating G-protein coupled receptor signaling pathway)//GO:0035589(G-protein coupled purinergic nucleotide receptor signaling pathway)//GO:0070257(positive regulation of mucus secretion)
TMEM251	ENSGALG00000017387	protein_coding	+	chr5:44314989-44318108	18.3472	4.80859	3.81549	1.93187	0.0604	0.994263	up	423422	C5H14orf109	CGNC:51960|Ensembl:ENSGALG00000017387	5	-	transmembrane protein 251		GO:0016021(integral component of membrane)
-	ENSGALG00000017395	protein_coding	+	chr2:17930604-17933285	1.36695	0.446088	3.06431	1.61556	1	1	up
USP43	ENSGALG00000017417	protein_coding	+	chr18:2180733-2183708	0.692469	0	inf	inf	1	1	up	101751148	-	CGNC:70578	18	-	ubiquitin specific peptidase 43
-	ENSGALG00000017553	protein_coding	-	chr27:3836212-3839456	7.81246	3.86975	2.01886	1.01354	0.16545	0.994263	up
POLR3K	ENSGALG00000017681	protein_coding	-	chr14:11971380-11995106	34.1278	13.8477	2.46451	1.3013	0.3001	0.994263	up	768505	-	CGNC:13125	14	-	RNA polymerase III subunit K
cytb	ENSGALG00000018360	protein_coding	+	chrM:14892-16035	4100.47	1080.78	3.794	1.92372	0.00135	0.646654	up	807641	-	-	MT	-	cytochrome b	gga00190(Oxidative phosphorylation)//gga01100(Metabolic pathways)//gga04260(Cardiac muscle contraction)
ND5	ENSGALG00000018361	protein_coding	+	chrM:13070-14888	2968.95	872.422	3.4031	1.76685	0.0035	0.855313	up	807642	-	-	MT	-	NADH dehydrogenase subunit 5	gga00190(Oxidative phosphorylation)//gga01100(Metabolic pathways)
ND4	ENSGALG00000018364	protein_coding	+	chrM:11195-12863	1978.35	608.757	3.24982	1.70036	0.0017	0.646654	up	807643	-	-	MT	-	NADH dehydrogenase subunit 4	gga00190(Oxidative phosphorylation)//gga01100(Metabolic pathways)
ND3	ENSGALG00000018366	protein_coding	+	chrM:10775-11126	1894.36	401.18	4.72197	2.23939	5e-05	0.0434444	up	807638	-	-	MT	-	NADH dehydrogenase subunit 3	gga00190(Oxidative phosphorylation)//gga01100(Metabolic pathways)
COX3	ENSGALG00000018367	protein_coding	+	chrM:9084-10706	11020.4	3958.01	2.78433	1.47733	0.1206	0.994263	up	807637	-	-	MT	-	cytochrome c oxidase subunit III	gga00190(Oxidative phosphorylation)//gga01100(Metabolic pathways)//gga04260(Cardiac muscle contraction)
ATP6	ENSGALG00000018368	protein_coding	+	chrM:9084-10706	9690.34	2517.2	3.84966	1.94473	0.11885	0.994263	up	807646	-	-	MT	-	ATP synthase F0 subunit 6	gga00190(Oxidative phosphorylation)//gga01100(Metabolic pathways)
Cu	ENSGALG00000018370	protein_coding	+	chrM:8330-9014	13779.6	6254.13	2.20328	1.13965	0.07335	0.994263	up
COX1	ENSGALG00000018373	protein_coding	+	chrM:6644-8258	10997.4	5497.43	2.00046	1.00033	0.2107	0.994263	up	807639	-	-	MT	-	cytochrome c oxidase subunit I	gga00190(Oxidative phosphorylation)//gga01100(Metabolic pathways)//gga04260(Cardiac muscle contraction)
ND2	ENSGALG00000018378	protein_coding	+	chrM:5240-6355	1163.28	260.173	4.47119	2.16066	5e-05	0.0434444	up	807645	-	-	MT	-	NADH dehydrogenase subunit 2	gga00190(Oxidative phosphorylation)//gga01100(Metabolic pathways)
ND1	ENSGALG00000018382	protein_coding	+	chrM:4049-5024	8077.96	2481.53	3.25523	1.70276	0.0127	0.994263	up	807636	-	-	MT	-	NADH dehydrogenase subunit 1	gga00190(Oxidative phosphorylation)//gga01100(Metabolic pathways)
PCGF2	ENSGALG00000018815	protein_coding	-	chr27:4008145-4011942	7.12217	2.54149	2.80236	1.48664	0.1719	0.994263	up	425919	-	CGNC:52615|Ensembl:ENSGALG00000018815	27	-	polycomb group ring finger 2
-	ENSGALG00000019198	protein_coding	+	chr1:98149456-98319373	5.22522	1.06515	4.90564	2.29444	0.24685	0.994263	up
-	ENSGALG00000019291	protein_coding	-	chr1:60251652-60272274	0.151159	0	inf	inf	1	1	up
ENY2	ENSGALG00000019438	protein_coding	+	chr2:131754387-131759954	64.9527	21.3849	3.03732	1.6028	0.0304	0.994263	up	420275	-	CGNC:13864|Ensembl:ENSGALG00000036618	2	-	ENY2, transcription and export complex 2 subunit		GO:0070390(transcription export complex 2)//GO:0005643(nuclear pore)//GO:0000124(SAGA complex)//GO:0071819(DUBm complex)	GO:0003713(transcription coactivator activity)	GO:0006406(mRNA export from nucleus)//GO:0006368(transcription elongation from RNA polymerase II promoter)//GO:0016578(histone deubiquitination)//GO:0045893(positive regulation of transcription, DNA-templated)
POLR2K	ENSGALG00000019444	protein_coding	+	chr2:128171122-128173950	51.6839	17.6416	2.92967	1.55074	0.0673	0.994263	up	768387	-	CGNC:54423	2	-	RNA polymerase II subunit K
FAM206A	ENSGALG00000019524	protein_coding	-	chr2:88558022-88560120	16.0938	4.37351	3.67983	1.87964	0.0899	0.994263	up	420983	C2H9orf6|C9orf6	CGNC:13895|Ensembl:ENSGALG00000019524	2	-	family with sequence similarity 206 member A		GO:0016607(nuclear speck)
ACBD7	ENSGALG00000019663	protein_coding	+	chr2:20501821-20505075	4.3749	1.18938	3.67833	1.87905	0.2657	0.994263	up	420531	-	CGNC:13940|Ensembl:ENSGALG00000019663	2	-	acyl-CoA binding domain containing 7			GO:0000062(fatty-acyl-CoA binding)
DAP3	ENSGALG00000019796	protein_coding	+	chr25:1424760-1432348	25.9183	6.72687	3.85294	1.94596	0.0084	0.994263	up	425065	-	CGNC:13985|Ensembl:ENSGALG00000019796	25	-	death associated protein 3		GO:0015935(small ribosomal subunit)//GO:0005761(mitochondrial ribosome)		GO:0006915(apoptotic process)
ZNF692	ENSGALG00000019836	protein_coding	-	chr16:215496-221850	1.07905	0.440173	2.45144	1.29363	1	1	up	427095	BZFP3	CGNC:14003|Ensembl:ENSGALG00000041845	16	-	zinc finger protein 692
TMEM14A	ENSGALG00000019894	protein_coding	-	chr3:87839731-87846584	32.1478	15.9771	2.01213	1.00872	0.06715	0.994263	up	421897	-	CGNC:14030|Ensembl:ENSGALG00000019894	3	-	transmembrane protein 14A		GO:0016021(integral component of membrane)
ADAT2	ENSGALG00000019976	protein_coding	+	chr3:51748191-51757550	3.69681	1.00388	3.68254	1.8807	0.42625	0.994263	up	421670	DEADC1	CGNC:14052	3	-	adenosine deaminase, tRNA specific 2		GO:0052718(tRNA-specific adenosine-34 deaminase complex)	GO:0052717(tRNA-specific adenosine-34 deaminase activity)//GO:0008270(zinc ion binding)	GO:0006400(tRNA modification)
-	ENSGALG00000020320	protein_coding	+	chr4:2379767-2382636	0.766371	0	inf	inf	1	1	up
-	ENSGALG00000020331	protein_coding	+	chr4:1413959-1419848	0.842333	0	inf	inf	1	1	up
TMX1	ENSGALG00000020340	protein_coding	+	chr5:57914584-57916800	2.08354	0	inf	inf	1	1	up	423580	TXNDC1	CGNC:14160	5	-	thioredoxin related transmembrane protein 1
-	ENSGALG00000020380	protein_coding	-	chr5:49383394-49385807	0.470904	0	inf	inf	1	1	up
-	ENSGALG00000020463	protein_coding	-	chr5:23209787-23216626	1.96792	0	inf	inf	1	1	up
LPXN	ENSGALG00000020482	protein_coding	+	chr5:16241393-16243401	2.79846	0.570714	4.90346	2.2938	1	1	up	423129	-	CGNC:14208	5	-	leupaxin
CZH9ORF80	ENSGALG00000020528	protein_coding	+	chrZ:65744964-65755449	22.3593	8.22467	2.71857	1.44285	0.03415	0.994263	up
STK32C	ENSGALG00000020615	protein_coding	-	chr6:34412707-34434522	1.33823	0.272923	4.90332	2.29376	1	1	up	769291	-	CGNC:14261|Ensembl:ENSGALG00000020615	6	-	serine/threonine kinase 32C		GO:0005622(intracellular)	GO:0005524(ATP binding)//GO:0004674(protein serine/threonine kinase activity)	GO:0035556(intracellular signal transduction)//GO:0018105(peptidyl-serine phosphorylation)
LDLRAD1	ENSGALG00000020647	protein_coding	-	chr8:24023107-24025375	1.25055	0	inf	inf	1	1	up	772294	-	CGNC:14270	8	-	low density lipoprotein receptor class A domain containing 1
C1orf228	ENSGALG00000020716	protein_coding	+	chr8:19636537-19661258	1.82599	0.893715	2.04314	1.03079	1	1	up	101751863	C8H1orf228	CGNC:71278|Ensembl:ENSGALG00000020716	8	-	chromosome 1 open reading frame 228
VRK3	ENSGALG00000020725	protein_coding	-	chr14:14279293-14287355	3.70393	1.00722	3.67736	1.87867	0.18985	0.994263	up	770440	-	CGNC:14296	14	-	vaccinia related kinase 3
RHO	ENSGALG00000020745	protein_coding	+	chr12:19501547-19505631	0.411101	0	inf	inf	1	1	up	751791	CSNBAD1|OPN2|RDP1|RP4|opsin-2	CGNC:54369|Ensembl:ENSGALG00000020745	12	-	rhodopsin	gga04744(Phototransduction)	GO:0016021(integral component of membrane)//GO:0005623(cell)//GO:0042622(photoreceptor outer segment membrane)//GO:0005794(Golgi apparatus)//GO:0001750(photoreceptor outer segment)//GO:0060342(photoreceptor inner segment membrane)//GO:0005911(cell-cell junction)	GO:0009881(photoreceptor activity)//GO:0001965(G-protein alpha-subunit binding)//GO:0008020(G-protein coupled photoreceptor activity)//GO:0004930(G-protein coupled receptor activity)//GO:0042803(protein homodimerization activity)	GO:0060041(retina development in camera-type eye)//GO:0045494(photoreceptor cell maintenance)//GO:0006468(protein phosphorylation)//GO:0007602(phototransduction)//GO:0016037(light absorption)//GO:0007601(visual perception)//GO:0070207(protein homotrimerization)//GO:0009584(detection of visible light)//GO:0007186(G-protein coupled receptor signaling pathway)//GO:0071482(cellular response to light …
-	ENSGALG00000020995	protein_coding	+	chr11:16301761-16302919	3.16075	0.644181	4.90662	2.29473	1	1	up
-	ENSGALG00000021025	protein_coding	+	chr20:10355368-10358718	0.290994	0	inf	inf	1	1	up
MYOC	ENSGALG00000021074	protein_coding	+	chr8:4707986-4710477	1.91433	0.390468	4.90264	2.29356	1	1	up	424391	-	CGNC:14423	8	-	myocilin
-	ENSGALG00000021092	protein_coding	-	chr9:8992990-9010770	0.27284	0	inf	inf	1	1	up
SLC7A9	ENSGALG00000021158	protein_coding	-	chr11:9426935-9439193	0.761796	0	inf	inf	1	1	up	415768	-	CGNC:14458|Ensembl:ENSGALG00000021158	11	-	solute carrier family 7 member 9		GO:0005887(integral component of plasma membrane)//GO:0031526(brush border membrane)//GO:0016324(apical plasma membrane)	GO:0015297(antiporter activity)//GO:0015175(neutral amino acid transmembrane transporter activity)//GO:0015184(L-cystine transmembrane transporter activity)	GO:0015804(neutral amino acid transport)//GO:0003333(amino acid transmembrane transport)//GO:0015811(L-cystine transport)
-	ENSGALG00000021171	protein_coding	-	chr10:11795652-11837829	0.223187	0.0910645	2.45086	1.29329	1	1	up
STARD5	ENSGALG00000021193	protein_coding	+	chr10:11594610-11598855	14.5454	6.22552	2.33642	1.2243	0.03885	0.994263	up	770108	-	CGNC:14468|Ensembl:ENSGALG00000021193	10	-	StAR related lipid transfer domain containing 5		GO:0005739(mitochondrion)	GO:0015485(cholesterol binding)//GO:0017127(cholesterol transporter activity)//GO:0032052(bile acid binding)	GO:0070508(cholesterol import)
-	ENSGALG00000021226	protein_coding	+	chr14:2345371-2347987	2.94831	1.2023	2.45222	1.29409	1	1	up
-	ENSGALG00000021240	protein_coding	-	chr8:1170923-1177199	2.82589	0.57596	4.90638	2.29466	1	1	up
MPZL3	ENSGALG00000021271	protein_coding	-	chr24:5459062-5464891	0.732526	0.199218	3.677	1.87853	1	1	up	419778	-	CGNC:14498|Ensembl:ENSGALG00000021271	24	-	myelin protein zero like 3		GO:0016021(integral component of membrane)		GO:0030198(extracellular matrix organization)
GPRC5C	ENSGALG00000021362	protein_coding	+	chr18:9409165-9418022	0.199501	0	inf	inf	1	1	up	427814	-	CGNC:14541|Ensembl:ENSGALG00000021362	18	-	G protein-coupled receptor class C group 5 member C		GO:0016021(integral component of membrane)	GO:0004930(G-protein coupled receptor activity)	GO:0007186(G-protein coupled receptor signaling pathway)
-	ENSGALG00000021437	protein_coding	-	chr13:9733462-9734974	0.828819	0	inf	inf	1	1	up
PANX3	ENSGALG00000021443	protein_coding	-	chr24:301427-304582	2.54496	1.1863	2.1453	1.10118	1	1	up	768736	-	CGNC:14569|Ensembl:ENSGALG00000021443	24	-	pannexin 3		GO:0005886(plasma membrane)//GO:0012505(endomembrane system)//GO:0005921(gap junction)//GO:0016021(integral component of membrane)	GO:0022829(wide pore channel activity)	GO:0006812(cation transport)//GO:0055085(transmembrane transport)//GO:0007267(cell-cell signaling)
-	ENSGALG00000021479	protein_coding	-	chr18:6414769-6415971	8.50732	0	inf	inf	0.01145	0.994263	up
PRPSAP1	ENSGALG00000021539	protein_coding	+	chr18:4413064-4436276	23.9716	11.5853	2.06914	1.04903	0.02195	0.994263	up	417360	-	CGNC:14613|Ensembl:ENSGALG00000021539	18	-	phosphoribosyl pyrophosphate synthetase associated protein 1			GO:0004749(ribose phosphate diphosphokinase activity)//GO:0000287(magnesium ion binding)//GO:0042802(identical protein binding)	GO:0009116(nucleoside metabolic process)//GO:0009165(nucleotide biosynthetic process)
TMEM59L	ENSGALG00000021620	protein_coding	-	chr28:3643256-3650421	1.85781	0	inf	inf	1	1	up	420122	-	CGNC:14649|Ensembl:ENSGALG00000021620	28	-	transmembrane protein 59 like		GO:0016021(integral component of membrane)
NRTN	ENSGALG00000021647	protein_coding	-	chr28:1507548-1509672	1.99467	0	inf	inf	1	1	up	428340	-	CGNC:14663|Ensembl:ENSGALG00000021647	28	-	neurturin		GO:0005576(extracellular region)	GO:0008083(growth factor activity)	GO:0007169(transmembrane receptor protein tyrosine kinase signaling pathway)//GO:0031175(neuron projection development)//GO:0001755(neural crest cell migration)//GO:0021675(nerve development)
-	ENSGALG00000021692	protein_coding	-	chr28:794174-797199	20.2033	5.14308	3.92826	1.97389	0.13025	0.994263	up
-	ENSGALG00000021706	protein_coding	-	chr26:2045548-2051797	1.52699	0.622445	2.45321	1.29467	1	1	up
PADI1	ENSGALG00000021714	protein_coding	-	chr21:138390-148124	0.226372	0	inf	inf	1	1	up	428171	cPAD1	CGNC:53285|Ensembl:ENSGALG00000039572	21	-	peptidyl arginine deiminase 1		GO:0005623(cell)//GO:0005634(nucleus)//GO:0005737(cytoplasm)	GO:0004668(protein-arginine deiminase activity)//GO:0005509(calcium ion binding)	GO:0036414(histone citrullination)
ATP8	ENSGALG00000021717	protein_coding	+	chrM:9084-10706	12703.9	3610.26	3.51884	1.8151	0.5901	0.994263	up	807647	-	-	MT	-	ATP synthase F0 subunit 8	gga00190(Oxidative phosphorylation)//gga01100(Metabolic pathways)
ND4L	ENSGALG00000021719	protein_coding	+	chrM:11195-12863	2409.18	743.658	3.23963	1.69583	0.3149	0.994263	up	807644	-	-	MT	-	NADH dehydrogenase subunit 4L	gga00190(Oxidative phosphorylation)//gga01100(Metabolic pathways)
EVA1B	ENSGALG00000022440	protein_coding	+	chr23:4007213-4007707	16.828	3.04238	5.53119	2.46759	0.2185	0.994263	up	101749609	-	CGNC:69074|Ensembl:ENSGALG00000022440	23	-	eva-1 homolog B		GO:0016021(integral component of membrane)
-	ENSGALG00000022715	protein_coding	-	chr1:185103361-185107655	13.6678	1.39049	9.82951	3.29712	0.2595	0.994263	up
-	ENSGALG00000022749	protein_coding	-	chr1:145645683-145647112	1.43539	0	inf	inf	1	1	up
GGACT	ENSGALG00000022758	protein_coding	+	chr1:143230156-143230654	5.26182	0	inf	inf	0.01765	0.994263	up	418773	A2LD1	CGNC:50849|Ensembl:ENSGALG00000022758	1	-	gamma-glutamylamine cyclotransferase		GO:0070062(extracellular exosome)	GO:0003839(gamma-glutamylcyclotransferase activity)	GO:0042219(cellular modified amino acid catabolic process)
-	ENSGALG00000022892	protein_coding	-	chr1:79402637-79403091	4.62187	1.87797	2.46109	1.2993	0.5626	0.994263	up
-	ENSGALG00000022958	protein_coding	+	chr4:82763954-82777427	0.442403	0	inf	inf	1	1	up
SULT1B1	ENSGALG00000023120	protein_coding	-	chr4:51210794-51213076	8.97144	4.39045	2.0434	1.03097	0.21315	0.994263	up	395227	ST1B1|SULT1B	CGNC:49221|Ensembl:ENSGALG00000023120	4	-	sulfotransferase family cytosolic 1B member 1		GO:0005737(cytoplasm)	GO:0008146(sulfotransferase activity)	GO:0051923(sulfation)//GO:0006805(xenobiotic metabolic process)//GO:0042403(thyroid hormone metabolic process)//GO:0008202(steroid metabolic process)
-	ENSGALG00000023122	protein_coding	-	chr4:51208550-51210637	1.37607	0.374118	3.67817	1.87899	1	1	up
EP3	ENSGALG00000023142	protein_coding	-	chr8:27999301-28010900	0.418984	0.205153	2.04231	1.0302	1	1	up
MRPS18C	ENSGALG00000023191	protein_coding	+	chr4:45865767-45890341	6.84073	3.34287	2.04636	1.03306	0.55665	0.994263	up	770813	-	CGNC:16122|Ensembl:ENSGALG00000023191	4	-	mitochondrial ribosomal protein S18C	gga03010(Ribosome)	GO:0005763(mitochondrial small ribosomal subunit)//GO:0022627(cytosolic small ribosomal subunit)	GO:0003735(structural constituent of ribosome)	GO:0032543(mitochondrial translation)
-	ENSGALG00000023237	protein_coding	-	chr10:19568288-19570041	0.671879	0.274049	2.45168	1.29377	1	1	up
GDPGP1	ENSGALG00000023246	protein_coding	+	chr10:19539823-19540927	3.55719	1.08802	3.26941	1.70903	1	1	up	100858151	-	CGNC:64926|Ensembl:ENSGALG00000045045	10	-	GDP-D-glucose phosphorylase 1			GO:0080048(GDP-D-glucose phosphorylase activity)
INPP5J	ENSGALG00000023266	protein_coding	+	chr15:9991441-10000294	2.23813	0.913098	2.45114	1.29345	1	1	up	416996	PIB5PA	CGNC:16197	15	-	inositol polyphosphate-5-phosphatase J	gga00562(Inositol phosphate metabolism)//gga01100(Metabolic pathways)//gga04070(Phosphatidylinositol signaling system)
-	ENSGALG00000023305	protein_coding	-	chr5:23298068-23299543	1.4638	0	inf	inf	1	1	up
-	ENSGALG00000023439	protein_coding	-	chr7:14909331-14917988	1.37918	0	inf	inf	1	1	up
C9orf152	ENSGALG00000023454	protein_coding	+	chr2:6174628-6180337	0.739695	0	inf	inf	1	1	up	101750288	C2H9orf152	CGNC:16385	2	-	chromosome 2 open reading frame, human C9orf152
ASCL2	ENSGALG00000023607	protein_coding	+	chr5:13052451-13054315	0.350411	0	inf	inf	1	1	up	395791	-	CGNC:49479	5	-	achaete-scute family bHLH transcription factor 2
-	ENSGALG00000023608	protein_coding	-	chr18:2535557-2536882	1.05956	0	inf	inf	1	1	up
LRRC31	ENSGALG00000023616	protein_coding	+	chr9:19387993-19398093	7.36292	3.21809	2.28799	1.19408	0.12645	0.994263	up	424994	-	CGNC:16547|Ensembl:ENSGALG00000023616	9	-	leucine rich repeat containing 31
ZSWIM7	ENSGALG00000023686	protein_coding	-	chr19:6449078-6462281	2.28572	1.11857	2.04343	1.03099	1	1	up	417596	-	CGNC:16617|Ensembl:ENSGALG00000023686	19	-	zinc finger SWIM-type containing 7		GO:0097196(Shu complex)	GO:0008270(zinc ion binding)	GO:0050821(protein stabilization)//GO:0000724(double-strand break repair via homologous recombination)
DNASE1L2	ENSGALG00000023707	protein_coding	-	chr14:12310667-12313707	0.589704	0	inf	inf	1	1	up	427682	-	CGNC:53163	14	-	deoxyribonuclease 1 like 2
UBXN10	ENSGALG00000023708	protein_coding	+	chr21:4846208-4848286	1.69773	0.461496	3.67876	1.87922	1	1	up	771670	UBXD3	CGNC:16639|Ensembl:ENSGALG00000023708	21	-	UBX domain protein 10		GO:0030992(intraciliary transport particle B)//GO:0005929(cilium)		GO:0060271(cilium assembly)
PIFO	ENSGALG00000023763	protein_coding	-	chr26:5112282-5114932	0.784096	0	inf	inf	1	1	up	419930	C1orf88|C26H1ORF88|pitchfork	CGNC:16694|Ensembl:ENSGALG00000023763	26	-	primary cilia formation		GO:0005634(nucleus)//GO:0036064(ciliary basal body)//GO:0005802(trans-Golgi network)	GO:0017137(Rab GTPase binding)//GO:0019894(kinesin binding)//GO:0019901(protein kinase binding)//GO:0008092(cytoskeletal protein binding)//GO:0043015(gamma-tubulin binding)//GO:0048487(beta-tubulin binding)	GO:0033674(positive regulation of kinase activity)//GO:0031344(regulation of cell projection organization)
TMEM82	ENSGALG00000023779	protein_coding	+	chr21:4223960-4228341	1.88144	0	inf	inf	1	1	up	771495	-	CGNC:16710	21	-	transmembrane protein 82
CCNI2	ENSGALG00000023812	protein_coding	+	chr13:16302772-16403020	2.14583	1.05016	2.04334	1.03093	1	1	up	771567	-	CGNC:56878	13	-	cyclin I family member 2
LDHD	ENSGALG00000023828	protein_coding	-	chr11:1954984-1958515	0.985833	0.268074	3.67746	1.87871	1	1	up	415689	-	CGNC:50050|Ensembl:ENSGALG00000023828	11	-	lactate dehydrogenase D	gga00620(Pyruvate metabolism)	GO:0005739(mitochondrion)	GO:0016614(oxidoreductase activity, acting on CH-OH group of donors)//GO:0050660(flavin adenine dinucleotide binding)	GO:0055114(oxidation-reduction process)
-	ENSGALG00000023846	protein_coding	-	chr20:5670953-5673320	1.78486	0	inf	inf	1	1	up
G0S2	ENSGALG00000023933	protein_coding	+	chr26:3082073-3082959	3.19175	0	inf	inf	1	1	up	419860	GOS2	CGNC:16864|Ensembl:ENSGALG00000023933	26	-	G0/G1 switch 2
CMC4	ENSGALG00000023937	protein_coding	-	chr4:2156281-2160713	1.04063	0	inf	inf	1	1	up	107049048	-	CGNC:72080|Ensembl:ENSGALG00000023937	4	-	C-X9-C motif containing 4		GO:0005758(mitochondrial intermembrane space)
-	ENSGALG00000023986	protein_coding	-	chr1:106371-113665	0.383446	0	inf	inf	1	1	up
TDRKH	ENSGALG00000024012	protein_coding	-	chr25:2148706-2153155	1.00817	0.41127	2.45137	1.29359	1	1	up	425667	-	CGNC:16943|Ensembl:ENSGALG00000031812	25	-	tudor and KH domain containing		GO:0016021(integral component of membrane)	GO:0003723(RNA binding)
TGFA	ENSGALG00000024024	protein_coding	-	chr22:3012324-3020413	11.0047	2.55976	4.29909	2.10403	0.25895	0.994263	up	414743	-	CGNC:16955	22	-	transforming growth factor alpha	gga04012(ErbB signaling pathway)
PI4KB	ENSGALG00000024034	protein_coding	-	chr25:1746787-1963328	2.89217	0.832912	3.47237	1.79592	1	1	up	100859723	PIK4CB	CGNC:16965|Ensembl:ENSGALG00000024034	25	-	phosphatidylinositol 4-kinase beta	gga00562(Inositol phosphate metabolism)//gga01100(Metabolic pathways)//gga04070(Phosphatidylinositol signaling system)
FAHD1	ENSGALG00000024041	protein_coding	+	chr14:6042706-6043830	10.0081	2.83935	3.5248	1.81754	0.09085	0.994263	up	416538	-	CGNC:16972|Ensembl:ENSGALG00000024041	14	-	fumarylacetoacetate hydrolase domain containing 1	gga00350(Tyrosine metabolism)//gga01100(Metabolic pathways)	GO:0005654(nucleoplasm)//GO:0005743(mitochondrial inner membrane)//GO:0005829(cytosol)	GO:0008948(oxaloacetate decarboxylase activity)//GO:0034545(fumarylpyruvate hydrolase activity)//GO:0018773(acetylpyruvate hydrolase activity)	GO:0008152(metabolic process)
MYCL	ENSGALG00000024047	protein_coding	-	chr23:5485392-5489141	1.14589	0.373972	3.06411	1.61547	1	1	up	428231	MYCL1	CGNC:16978|Ensembl:ENSGALG00000024047	23	-	v-myc avian myelocytomatosis viral oncogene lung carcinoma derived homolog		GO:0005634(nucleus)	GO:0046983(protein dimerization activity)//GO:0003700(transcription factor activity, sequence-specific DNA binding)	GO:0045607(regulation of auditory receptor cell differentiation)//GO:0006355(regulation of transcription, DNA-templated)
RAB33A	ENSGALG00000024049	protein_coding	-	chr4:1546275-1550460	0.763495	0	inf	inf	1	1	up	107049032	-	CGNC:16980|Ensembl:ENSGALG00000024049	4	-	RAB33A, member RAS oncogene family			GO:0003924(GTPase activity)//GO:0005525(GTP binding)	GO:0019882(antigen processing and presentation)
JAML	ENSGALG00000024072	protein_coding	-	chr24:5452746-5454564	1.80024	0.73417	2.45209	1.29401	1	1	up	419777	AMICA1	CGNC:51089	24	-	junction adhesion molecule like
-	ENSGALG00000024295	protein_coding	+	chr23:3213947-3216350	17.2267	5.60798	3.07181	1.61909	0.2248	0.994263	up
-	ENSGALG00000024335	protein_coding	-	chr16:478530-480245	4.10948	2.01119	2.04331	1.03091	0.33175	0.994263	up
AMH	ENSGALG00000024368	protein_coding	-	chr28:1956622-1960825	0.154196	0	inf	inf	1	1	up	395887	-	CGNC:537|Ensembl:ENSGALG00000036346	28	-	anti-Mullerian hormone	gga04060(Cytokine-cytokine receptor interaction)//gga04350(TGF-beta signaling pathway)	GO:0005576(extracellular region)	GO:0008083(growth factor activity)	GO:0008406(gonad development)
DEF8	ENSGALG00000025712	protein_coding	+	chr11:18293265-18296749	7.72894	3.57326	2.16299	1.11303	0.13565	0.994263	up	769452	-	CGNC:28113|Ensembl:ENSGALG00000025712	11	-	differentially expressed in FDCP 8 homolog
-	ENSGALG00000025733	protein_coding	+	chr24:5307153-5311673	1.06702	0	inf	inf	1	1	up
-	ENSGALG00000025736	protein_coding	-	chrW:4703-10272	0.548707	0.191909	2.8592	1.51561	1	1	up
-	ENSGALG00000025807	protein_coding	-	chr5:28197612-28199230	13.1869	6.4243	2.05265	1.03749	0.5103	0.994263	up
MRPL9	ENSGALG00000025814	protein_coding	-	chr25:2144685-2146230	3.21601	0	inf	inf	1	1	up	100858402	-	CGNC:64680|Ensembl:ENSGALG00000042941	25	-	mitochondrial ribosomal protein L9	gga03010(Ribosome)	GO:0005840(ribosome)	GO:0003735(structural constituent of ribosome)	GO:0006412(translation)
KIAA0513	ENSGALG00000025938	protein_coding	-	chr11:17104457-17233182	0.201978	0	inf	inf	1	1	up	772040	-	CGNC:29604	11	-	KIAA0513
SLA2	ENSGALG00000025948	protein_coding	+	chr20:869593-872258	0.82945	0	inf	inf	1	1	up	100858750	-	CGNC:64351|Ensembl:ENSGALG00000025948	20	-	Src like adaptor 2		GO:0031234(extrinsic component of cytoplasmic side of plasma membrane)//GO:0005654(nucleoplasm)//GO:0005794(Golgi apparatus)//GO:0005770(late endosome)	GO:0005102(receptor binding)//GO:0004715(non-membrane spanning protein tyrosine kinase activity)//GO:0047485(protein N-terminus binding)//GO:0005070(SH3/SH2 adaptor activity)	GO:0007169(transmembrane receptor protein tyrosine kinase signaling pathway)//GO:0000122(negative regulation of transcription from RNA polymerase II promoter)//GO:0045087(innate immune response)//GO:0038083(peptidyl-tyrosine autophosphorylation)//GO:0030154(cell differentiation)//GO:0016477(cell migration)//GO:0042110(T cell activation)//GO:0042127(regulation of cell proliferation)//GO:0009967(po…
SELM	ENSGALG00000025972	protein_coding	-	chr15:9991441-10000294	38.3601	16.9946	2.25719	1.17453	0.0782	0.994263	up
-	ENSGALG00000026039	protein_coding	-	chr25:2161975-2163503	0.809044	0	inf	inf	1	1	up
-	ENSGALG00000026084	protein_coding	-	chr23:2053662-2086993	0.406031	0	inf	inf	1	1	up
CDC26	ENSGALG00000026095	protein_coding	+	chr17:1475848-1476656	9.09366	4.32468	2.10274	1.07227	0.31865	0.994263	up	417269	-	CGNC:50471|Ensembl:ENSGALG00000026095	17	-	cell division cycle 26	gga04110(Cell cycle)//gga04114(Oocyte meiosis)//gga04120(Ubiquitin mediated proteolysis)//gga04914(Progesterone-mediated oocyte maturation)	GO:0005680(anaphase-promoting complex)		GO:0030071(regulation of mitotic metaphase/anaphase transition)//GO:0070979(protein K11-linked ubiquitination)//GO:0031145(anaphase-promoting complex-dependent catabolic process)
MN1	ENSGALG00000026119	protein_coding	-	chr15:7488964-7521455	3.413	1.39236	2.45124	1.29351	1	1	up	416911	-	CGNC:50375	15	-	MN1 proto-oncogene, transcriptional regulator
-	ENSGALG00000026152	protein_coding	-	chr12:2286270-2288801	0.964541	0.196738	4.90268	2.29357	1	1	up
NMNAT3	ENSGALG00000026187	protein_coding	-	chr9:5438650-5460021	0.135905	0	inf	inf	1	1	up	424820	-	CGNC:66483|Ensembl:ENSGALG00000026187	9	-	nicotinamide nucleotide adenylyltransferase 3	gga00760(Nicotinate and nicotinamide metabolism)//gga01100(Metabolic pathways)	GO:0005739(mitochondrion)	GO:0004515(nicotinate-nucleotide adenylyltransferase activity)//GO:0005524(ATP binding)//GO:0000309(nicotinamide-nucleotide adenylyltransferase activity)	GO:0034628('de novo' NAD biosynthetic process from aspartate)//GO:0009611(response to wounding)
-	ENSGALG00000026188	protein_coding	+	chr14:12104177-12121865	5.95381	1.95538	3.04485	1.60637	0.0079	0.994263	up
FAM134B	ENSGALG00000026200	protein_coding	+	chr2:75643884-75709051	0.157106	0	inf	inf	1	1	up	100859798	-	CGNC:63356|Ensembl:ENSGALG00000042679	2	-	family with sequence similarity 134 member B
-	ENSGALG00000026225	protein_coding	+	chr18:7104676-7112415	3.43602	0	inf	inf	1	1	up
RGS8	ENSGALG00000026263	protein_coding	+	chr8:5564249-5580305	0.434713	0.0591272	7.35217	2.87817	1	1	up	426557	-	CGNC:66505|Ensembl:ENSGALG00000026263	8	-	regulator of G-protein signaling 8		GO:0005886(plasma membrane)//GO:0005737(cytoplasm)	GO:0005096(GTPase activator activity)	GO:0007186(G-protein coupled receptor signaling pathway)//GO:0043547(positive regulation of GTPase activity)
TAP1	ENSGALG00000026269	protein_coding	+	chr16:67622-76124	1.23538	0.504083	2.45074	1.29322	1	1	up	427727	-	CGNC:53176|Ensembl:ENSGALG00000035075	16	-	transporter 1, ATP-binding cassette, sub-family B (MDR/TAP)	gga02010(ABC transporters)//gga04145(Phagosome)//gga05168(Herpes simplex infection)	GO:0042825(TAP complex)	GO:0005524(ATP binding)//GO:0046979(TAP2 binding)//GO:0015440(peptide-transporting ATPase activity)//GO:0042287(MHC protein binding)	GO:0055085(transmembrane transport)//GO:0015833(peptide transport)//GO:0019885(antigen processing and presentation of endogenous peptide antigen via MHC class I)
TM2D3	ENSGALG00000026271	protein_coding	+	chr10:5730112-5734914	22.3935	10.6567	2.10136	1.07132	0.04255	0.994263	up	415390	-	CGNC:49971|Ensembl:ENSGALG00000026271	10	-	TM2 domain containing 3		GO:0016021(integral component of membrane)
TCF15	ENSGALG00000026276	protein_coding	+	chr20:10271498-10273928	2.00924	0	inf	inf	1	1	up	395788	-	CGNC:20222|Ensembl:ENSGALG00000026276	20	-	transcription factor 15 (basic helix-loop-helix)		GO:0005634(nucleus)//GO:0090575(RNA polymerase II transcription factor complex)	GO:0000978(RNA polymerase II core promoter proximal region sequence-specific DNA binding)//GO:0001077(transcriptional activator activity, RNA polymerase II core promoter proximal region sequence-specific binding)//GO:0046983(protein dimerization activity)//GO:0003677(DNA binding)	GO:0043588(skin development)//GO:0048339(paraxial mesoderm development)//GO:0042755(eating behavior)//GO:0060231(mesenchymal to epithelial transition)//GO:0036342(post-anal tail morphogenesis)//GO:0043583(ear development)//GO:0045198(establishment of epithelial cell apical/basal polarity)//GO:0048644(muscle organ morphogenesis)//GO:0006351(transcription, DNA-templated)//GO:0050884(neuromuscular p…
TIGD3	ENSGALG00000026277	protein_coding	-	chr2:535883-537155	1.12696	0.30643	3.67772	1.87881	1	1	up
PIGZ	ENSGALG00000026294	protein_coding	-	chr9:11938120-11940148	0.558033	0	inf	inf	1	1	up	429144	-	CGNC:25377|Ensembl:ENSGALG00000026294	9	-	phosphatidylinositol glycan anchor biosynthesis class Z	gga00563(Glycosylphosphatidylinositol(GPI)-anchor biosynthesis)	GO:0005783(endoplasmic reticulum)//GO:0005789(endoplasmic reticulum membrane)	GO:0000026(alpha-1,2-mannosyltransferase activity)//GO:0000030(mannosyltransferase activity)	GO:0097502(mannosylation)//GO:0006506(GPI anchor biosynthetic process)
MRPS2	ENSGALG00000026303	protein_coding	+	chr17:7720049-7721478	13.5105	6.35684	2.12535	1.0877	0.1664	0.994263	up	417140	-	CGNC:14611	17	-	mitochondrial ribosomal protein S2	gga03010(Ribosome)
-	ENSGALG00000026320	protein_coding	+	chr25:1981462-1985471	0.807226	0	inf	inf	1	1	up
-	ENSGALG00000026355	protein_coding	-	chr12:3130958-3141511	1.29688	0.529071	2.45124	1.29351	1	1	up
-	ENSGALG00000026371	protein_coding	+	chr2:50690129-50901617	1.88397	0	inf	inf	1	1	up
FAM96A	ENSGALG00000026448	protein_coding	-	chr10:19223717-19224696	10.166	0	inf	inf	0.01145	0.994263	up	415571	-	CGNC:66243|Ensembl:ENSGALG00000026448	10	-	family with sequence similarity 96 member A
CHST11	ENSGALG00000026473	protein_coding	-	chr1:54494943-54741556	2.16974	0.505908	4.28879	2.10057	1	1	up	418081	-	CGNC:9634	1	-	carbohydrate sulfotransferase 11	gga00532(Glycosaminoglycan biosynthesis - chondroitin sulfate / dermatan sulfate)
IP6K3	ENSGALG00000026536	protein_coding	+	chr26:4540473-4553563	0.156571	0	inf	inf	1	1	up	419908	IHPK3	CGNC:2080|Ensembl:ENSGALG00000026536	26	-	inositol hexakisphosphate kinase 3	gga04070(Phosphatidylinositol signaling system)	GO:0005634(nucleus)//GO:0005737(cytoplasm)	GO:0000831(inositol hexakisphosphate 6-kinase activity)//GO:0008440(inositol-1,4,5-trisphosphate 3-kinase activity)	GO:0006468(protein phosphorylation)//GO:0032958(inositol phosphate biosynthetic process)//GO:0046488(phosphatidylinositol metabolic process)
-	ENSGALG00000026561	protein_coding	-	chr3:38407362-38407917	8.78471	3.06696	2.86431	1.51819	0.36685	0.994263	up
-	ENSGALG00000026566	protein_coding	-	chr25:1746787-1963328	2.70918	0	inf	inf	1	1	up
-	ENSGALG00000026580	protein_coding	-	chr2:44260061-44267290	1.79668	0	inf	inf	1	1	up
-	ENSGALG00000026654	protein_coding	+	chr13:16565757-16577228	70.4155	13.8015	5.10203	2.35107	0.00215	0.646654	up
CELF5	ENSGALG00000026716	protein_coding	+	chr28:1233710-1264738	0.780308	0.212208	3.6771	1.87857	1	1	up	425867	BRUNOL5	CGNC:13130|Ensembl:ENSGALG00000026716	28	-	CUGBP, Elav-like family member 5			GO:0003723(RNA binding)
KIAA0040	ENSGALG00000026795	protein_coding	+	chr8:7045675-7050533	1.18807	0	inf	inf	1	1	up	424434	-	CGNC:52193|Ensembl:ENSGALG00000030543	8	-	KIAA0040		GO:0016021(integral component of membrane)
RGS13	ENSGALG00000026810	protein_coding	-	chr8:3585154-3592587	0.189024	0	inf	inf	1	1	up	429059	-	CGNC:25346|Ensembl:ENSGALG00000026810	8	-	regulator of G-protein signaling 13		GO:0005886(plasma membrane)//GO:0005634(nucleus)//GO:0005737(cytoplasm)//GO:0005829(cytosol)	GO:0005096(GTPase activator activity)	GO:0045744(negative regulation of G-protein coupled receptor protein signaling pathway)//GO:0007186(G-protein coupled receptor signaling pathway)//GO:0043547(positive regulation of GTPase activity)
C19orf70	ENSGALG00000026847	protein_coding	+	chr28:1271190-1288936	6.84246	2.02985	3.37091	1.75314	0.3057	0.994263	up	100858091	C28H19orf70	CGNC:64984|Ensembl:ENSGALG00000026847	28	-	chromosome 19 open reading frame 70		GO:0061617(MICOS complex)
PITX2	ENSGALG00000026881	protein_coding	+	chr4:57404742-57409306	1.78501	0	inf	inf	1	1	up	395862	Ptx2	CGNC:66216|Ensembl:ENSGALG00000042492	4	-	paired like homeodomain 2	gga04350(TGF-beta signaling pathway)	GO:0005634(nucleus)	GO:0043565(sequence-specific DNA binding)//GO:0003700(transcription factor activity, sequence-specific DNA binding)	GO:0061184(positive regulation of dermatome development)//GO:0032526(response to retinoic acid)//GO:2000287(positive regulation of myotome development)//GO:0030326(embryonic limb morphogenesis)//GO:0003007(heart morphogenesis)//GO:0045663(positive regulation of myoblast differentiation)//GO:0048562(embryonic organ morphogenesis)//GO:0001947(heart looping)//GO:2000288(positive regulation of myobla…
-	ENSGALG00000026994	protein_coding	+	chr1:139627973-139628198	7.2258	0	inf	inf	0.1162	0.994263	up
C1H11ORF67	ENSGALG00000027073	protein_coding	-	chr1:192124319-192131944	4.87567	2.2374	2.17917	1.12378	0.25515	0.994263	up
H2A-VIII	ENSGALG00000027113	protein_coding	-	chr1:48016718-48017108	14.0287	0	inf	inf	0.00215	0.646654	up
-	ENSGALG00000027169	protein_coding	-	chr6:21966797-21967118	17.7531	4.8009	3.69786	1.88669	0.31605	0.994263	up
NUDT8	ENSGALG00000027193	protein_coding	-	chr5:93844-95703	11.2619	5.23879	2.14972	1.10415	0.42115	0.994263	up	101748150	-	CGNC:67641	5	-	nudix hydrolase 8
-	ENSGALG00000027201	protein_coding	-	chr4:76600158-76601874	0.799219	0.217348	3.67713	1.87858	1	1	up
H2A-VIII	ENSGALG00000027315	protein_coding	+	chr1:48032690-48033080	44.0901	21.189	2.0808	1.05714	0.19115	0.994263	up
-	ENSGALG00000027334	protein_coding	+	chrZ:54537103-54549226	4.92231	1.7767	2.77047	1.47013	0.0314	0.994263	up
MPND	ENSGALG00000027354	protein_coding	-	chr28:1303284-1407097	1.83754	0.299788	6.12946	2.61576	1	1	up	100858729	-	CGNC:64370	28	-	MPN domain containing
C1orf159	ENSGALG00000027363	protein_coding	-	chr21:2646648-2657365	1.90076	0.82723	2.29773	1.20021	1	1	up
-	ENSGALG00000027366	protein_coding	-	chr15:9728773-9754570	0.4431	0	inf	inf	1	1	up
-	ENSGALG00000027372	protein_coding	+	chr25:1746787-1963328	0.239291	0	inf	inf	1	1	up
NR2C2AP	ENSGALG00000027375	protein_coding	+	chr28:3333910-3342226	0.407395	0	inf	inf	1	1	up	100858401	-	CGNC:64681	28	-	nuclear receptor 2C2 associated protein
PRR15L	ENSGALG00000027402	protein_coding	+	chr27:3869420-3870521	0.892224	0	inf	inf	1	1	up	100857311	-	CGNC:65700|Ensembl:ENSGALG00000046413	27	-	proline rich 15 like
GRIN2C	ENSGALG00000027415	protein_coding	-	chr18:10769811-10777868	0.135498	0	inf	inf	1	1	up	431090	-	CGNC:54137|Ensembl:ENSGALG00000027415	18	-	glutamate ionotropic receptor NMDA type subunit 2C	gga04020(Calcium signaling pathway)//gga04080(Neuroactive ligand-receptor interaction)	GO:0014069(postsynaptic density of dendrite)//GO:0030054(cell junction)//GO:0017146(NMDA selective glutamate receptor complex)//GO:0045211(postsynaptic membrane)	GO:0004972(NMDA glutamate receptor activity)//GO:0005234(extracellular-glutamate-gated ion channel activity)	GO:0033058(directional locomotion)//GO:0060079(excitatory postsynaptic potential)//GO:0008104(protein localization)//GO:0034765(regulation of ion transmembrane transport)//GO:0009611(response to wounding)//GO:0042177(negative regulation of protein catabolic process)//GO:0035235(ionotropic glutamate receptor signaling pathway)//GO:0098655(cation transmembrane transport)//GO:0050885(neuromuscular p…
SLC26A1	ENSGALG00000027423	protein_coding	+	chrZ:53357809-53404887	0.388627	0	inf	inf	1	1	up	101748788	-	CGNC:68269|Ensembl:ENSGALG00000027423	Z	-	solute carrier family 26 member 1
HDDC3	ENSGALG00000027446	protein_coding	+	chr10:19553414-19554362	7.12575	0	inf	inf	0.01145	0.994263	up	107056801	-	CGNC:79753|Ensembl:ENSGALG00000027446	10	-	HD domain containing 3
-	ENSGALG00000027510	protein_coding	-	chrZ:21828576-21865413	0.462866	0	inf	inf	1	1	up
SP5	ENSGALG00000027511	protein_coding	-	chr7:17752449-17753992	1.0982	0	inf	inf	1	1	up	693261	-	CGNC:27427|Ensembl:ENSGALG00000034094	7	-	Sp5 transcription factor			GO:0003676(nucleic acid binding)
-	ENSGALG00000027516	protein_coding	+	chr24:2807006-2812606	0.484363	0	inf	inf	1	1	up
GM2A	ENSGALG00000027534	protein_coding	-	chr13:12330336-12334108	27.0154	11.6901	2.31096	1.20849	0.058	0.994263	up	100857973	-	CGNC:65092	13	-	GM2 ganglioside activator	gga04142(Lysosome)
ATP6V0E1	ENSGALG00000027578	protein_coding	+	chr13:8477222-8481039	75.4046	29.8405	2.52692	1.33738	0.55185	0.994263	up	768854	-	CGNC:66611|Ensembl:ENSGALG00000002868	13	-	ATPase H+ transporting V0 subunit e1	gga00190(Oxidative phosphorylation)//gga01100(Metabolic pathways)//gga04145(Phagosome)
MRPL54	ENSGALG00000027611	protein_coding	-	chr28:983539-984920	15.9574	7.31517	2.18141	1.12526	0.25515	0.994263	up	100859867	-	CGNC:63291|Ensembl:ENSGALG00000027611	28	-	mitochondrial ribosomal protein L54		GO:0005762(mitochondrial large ribosomal subunit)	GO:0003723(RNA binding)
TRABD2B	ENSGALG00000027655	protein_coding	-	chr8:21100765-21356721	1.24544	0.298937	4.16622	2.05874	1	1	up	424623	-	CGNC:52228|Ensembl:ENSGALG00000027655	8	-	TraB domain containing 2B		GO:0005887(integral component of plasma membrane)//GO:0070062(extracellular exosome)//GO:0031301(integral component of organelle membrane)	GO:0017147(Wnt-protein binding)//GO:0004222(metalloendopeptidase activity)	GO:0006508(proteolysis)//GO:0030178(negative regulation of Wnt signaling pathway)//GO:0032461(positive regulation of protein oligomerization)//GO:1904808(positive regulation of protein oxidation)
-	ENSGALG00000027703	protein_coding	-	chr19:5749122-5751483	0.997337	0	inf	inf	1	1	up
ODF1	ENSGALG00000027719	protein_coding	+	chr2:128979714-128983749	0.143329	0	inf	inf	1	1	up	420257	-	CGNC:13866|Ensembl:ENSGALG00000035199	2	-	outer dense fiber of sperm tails 1
-	ENSGALG00000027722	protein_coding	+	chr9:14372524-14376751	4.63695	0.945334	4.90509	2.29428	0.24685	0.994263	up
CIDEA	ENSGALG00000027737	protein_coding	-	chr2:97144111-97156128	0.378463	0	inf	inf	1	1	up	768659	-	CGNC:10|Ensembl:ENSGALG00000034500	2	-	cell death-inducing DFFA-like effector a		GO:0005811(lipid droplet)		GO:0006915(apoptotic process)//GO:0019915(lipid storage)
HOXA3	ENSGALG00000027925	protein_coding	-	chr2:32797561-33229071	0.18815	0	inf	inf	1	1	up	395231	-	CGNC:49224|Ensembl:ENSGALG00000027925	2	-	homeobox A3		GO:0005634(nucleus)	GO:0043565(sequence-specific DNA binding)//GO:0003700(transcription factor activity, sequence-specific DNA binding)	GO:0006351(transcription, DNA-templated)//GO:0007275(multicellular organism development)//GO:0006355(regulation of transcription, DNA-templated)
RWDD3	ENSGALG00000027943	protein_coding	-	chr8:12262145-12271956	2.97985	1.21589	2.45076	1.29323	1	1	up	424481	-	CGNC:4145|Ensembl:ENSGALG00000038421	8	-	RWD domain containing 3
-	ENSGALG00000027961	protein_coding	-	chr28:972502-983104	0.105377	0	inf	inf	1	1	up
PRRG3	ENSGALG00000027977	protein_coding	-	chr4:10906726-10913244	0.809981	0.264371	3.06382	1.61533	1	1	up	422291	-	CGNC:5511|Ensembl:ENSGALG00000027977	4	-	proline rich and Gla domain 3
gadd45	ENSGALG00000028005	protein_coding	+	chrZ:43589018-43592114	1.79555	0.133193	13.4808	3.75283	1	1	up
RAB38	ENSGALG00000028018	protein_coding	+	chr1:187498827-187522674	0.199879	0	inf	inf	1	1	up	428095	-	CGNC:66547|Ensembl:ENSGALG00000028018	1	-	RAB38, member RAS oncogene family		GO:0005764(lysosome)//GO:0045335(phagocytic vesicle)//GO:0005802(trans-Golgi network)//GO:0005739(mitochondrion)//GO:0044233(ER-mitochondrion membrane contact site)//GO:0033162(melanosome membrane)//GO:0005769(early endosome)	GO:0003924(GTPase activity)//GO:0030742(GTP-dependent protein binding)//GO:0035651(AP-3 adaptor complex binding)//GO:0036461(BLOC-2 complex binding)//GO:0005525(GTP binding)//GO:0035650(AP-1 adaptor complex binding)	GO:0035646(endosome to melanosome transport)//GO:0090383(phagosome acidification)//GO:0007005(mitochondrion organization)//GO:0016192(vesicle-mediated transport)//GO:0072657(protein localization to membrane)//GO:1903232(melanosome assembly)
RHOV	ENSGALG00000028047	protein_coding	-	chr5:23569203-23575558	0.282183	0	inf	inf	1	1	up	428868	-	CGNC:6428|Ensembl:ENSGALG00000028047	5	-	ras homolog family member V		GO:0005622(intracellular)//GO:0016020(membrane)	GO:0003924(GTPase activity)//GO:0005525(GTP binding)	GO:0007264(small GTPase mediated signal transduction)
C2	ENSGALG00000028065	protein_coding	-	chr23:1766598-1788935	0.373707	0.152463	2.45114	1.29345	1	1	up	419574	-	CGNC:17285|Ensembl:ENSGALG00000035721	23	-	complement C2
LHFPL4	ENSGALG00000028092	protein_coding	-	chr12:11277817-11469823	4.66927	1.1904	3.92241	1.97174	0.52075	0.994263	up	770959	-	CGNC:56401	12	-	lipoma HMGIC fusion partner-like 4
SLC35E4	ENSGALG00000028106	protein_coding	-	chr15:10779333-10779759	23.9187	11.1239	2.1502	1.10447	0.29325	0.994263	up	101751586	-	CGNC:71006	15	-	solute carrier family 35 member E4
-	ENSGALG00000028116	protein_coding	+	chr4:79582075-79997954	1.19621	0	inf	inf	1	1	up
-	ENSGALG00000028119	protein_coding	-	chr25:1746787-1963328	0.449564	0	inf	inf	1	1	up
C5orf63	ENSGALG00000028135	protein_coding	-	chrZ:56141272-56153131	1.10622	0.515802	2.14465	1.10074	1	1	up
C15orf61	ENSGALG00000028141	protein_coding	+	chr10:18430851-18432733	19.8146	6.91569	2.86517	1.51862	0.21065	0.994263	up	101747767	C10H15ORF61	CGNC:67260|Ensembl:ENSGALG00000028141	10	-	chromosome 15 open reading frame 61
MED18	ENSGALG00000028149	protein_coding	-	chrZ:23844695-23846057	11.5887	4.38871	2.64057	1.40085	0.0911	0.994263	up	100857707	-	CGNC:65328|Ensembl:ENSGALG00000028149	Z	-	mediator complex subunit 18		GO:0070847(core mediator complex)//GO:0016592(mediator complex)	GO:0001104(RNA polymerase II transcription cofactor activity)	GO:0006357(regulation of transcription from RNA polymerase II promoter)//GO:0006369(termination of RNA polymerase II transcription)
IQCK	ENSGALG00000028197	protein_coding	-	chr14:14687363-14754407	4.4836	0.457048	9.80991	3.29424	0.1805	0.994263	up	426993	-	CGNC:24447	14	-	IQ motif containing K
TMEM55A	ENSGALG00000028264	protein_coding	-	chr2:124512881-124538359	5.30724	1.87948	2.82378	1.49763	0.0282	0.994263	up	420221	-	CGNC:66368|Ensembl:ENSGALG00000029571	2	-	transmembrane protein 55A	gga04070(Phosphatidylinositol signaling system)	GO:0016021(integral component of membrane)	GO:0034597(phosphatidylinositol-4,5-bisphosphate 4-phosphatase activity)	GO:0046856(phosphatidylinositol dephosphorylation)
FAM83A	ENSGALG00000028280	protein_coding	+	chr2:137525082-137540453	0.156683	0.0639327	2.45074	1.29322	1	1	up	770521	-	CGNC:66647|Ensembl:ENSGALG00000041748	2	-	family with sequence similarity 83 member A
-	ENSGALG00000028298	protein_coding	+	chrZ:32661862-32732699	0.162407	0.0662682	2.45076	1.29323	1	1	up
-	ENSGALG00000028302	protein_coding	+	chr13:16302772-16403020	1.02493	0	inf	inf	1	1	up
MED10	ENSGALG00000028336	protein_coding	+	chr2:79819043-79824696	10.8984	5.0101	2.17528	1.1212	0.0372	0.994263	up	420940	-	CGNC:66388|Ensembl:ENSGALG00000028336	2	-	mediator complex subunit 10		GO:0070847(core mediator complex)//GO:0016592(mediator complex)	GO:0001104(RNA polymerase II transcription cofactor activity)	GO:0019827(stem cell population maintenance)//GO:0045944(positive regulation of transcription from RNA polymerase II promoter)
MADCAM1	ENSGALG00000028341	protein_coding	+	chr28:2603715-2606506	1.68946	0.275642	6.12921	2.6157	1	1	up	100858236	-	CGNC:64842|Ensembl:ENSGALG00000028341	28	-	mucosal vascular addressin cell adhesion molecule 1	gga04514(Cell adhesion molecules (CAMs))//gga04672(Intestinal immune network for IgA production)
SDCBP2	ENSGALG00000028347	protein_coding	+	chr20:10178535-10180514	0.981585	0	inf	inf	1	1	up	100859439	-	CGNC:63703|Ensembl:ENSGALG00000028347	20	-	syndecan binding protein 2		GO:0070062(extracellular exosome)//GO:0005737(cytoplasm)	GO:0046982(protein heterodimerization activity)//GO:0008022(protein C-terminus binding)//GO:0042803(protein homodimerization activity)
H2A-VIII	ENSGALG00000028372	protein_coding	-	chr1:48010461-48011912	12.0246	4.88978	2.45913	1.29815	0.3653	0.994263	up
-	ENSGALG00000028390	protein_coding	-	chr4:49072801-49073995	2.02409	0	inf	inf	1	1	up
-	ENSGALG00000028412	protein_coding	+	chr3:30485201-30667659	0.932096	0.380115	2.45214	1.29404	1	1	up
H2A-VIII	ENSGALG00000028417	protein_coding	+	chr1:47924628-47925018	118.242	48.8978	2.41814	1.2739	0.03625	0.994263	up
-	ENSGALG00000028422	protein_coding	-	chr3:106441018-106633268	0.229677	0	inf	inf	1	1	up
MT4	ENSGALG00000028451	protein_coding	-	chr11:2110514-2112244	10.0472	4.9128	2.0451	1.03217	0.3622	0.994263	up
GSR	ENSGALG00000028470	protein_coding	-	chr4:34063267-34073559	3.07734	1.47724	2.08317	1.05878	1	1	up	771783	-	CGNC:66673|Ensembl:ENSGALG00000037781	4	-	glutathione-disulfide reductase	gga00480(Glutathione metabolism)	GO:0005623(cell)	GO:0050661(NADP binding)//GO:0050660(flavin adenine dinucleotide binding)//GO:0004362(glutathione-disulfide reductase activity)	GO:0045454(cell redox homeostasis)//GO:0055114(oxidation-reduction process)//GO:0098869(cellular oxidant detoxification)//GO:0006749(glutathione metabolic process)
CELF3	ENSGALG00000028478	protein_coding	-	chr25:2136904-2144301	1.33603	0	inf	inf	1	1	up	431347	-	CGNC:54220|Ensembl:ENSGALG00000028478	25	-	CUGBP, Elav-like family member 3
-	ENSGALG00000028485	protein_coding	-	chr5:28213859-28216513	6.54844	0.762466	8.58852	3.10241	0.2628	0.994263	up
GP5	ENSGALG00000028500	protein_coding	+	chr9:12377135-12379064	1.16895	0	inf	inf	1	1	up	100857508	-	CGNC:65516|Ensembl:ENSGALG00000045125	9	-	glycoprotein V platelet	gga04512(ECM-receptor interaction)	GO:0016021(integral component of membrane)
CABP2	ENSGALG00000028523	protein_coding	-	chr5:87692-93802	2.77548	1.35806	2.04372	1.0312	1	1	up	429967	-	CGNC:26029|Ensembl:ENSGALG00000037497	5	-	calcium binding protein 2			GO:0005509(calcium ion binding)
PIP5K1A	ENSGALG00000028578	protein_coding	+	chr25:1963703-1979923	4.3212	0.64106	6.74071	2.7529	0.10365	0.994263	up	429983	-	CGNC:66583|Ensembl:ENSGALG00000027372	25	-	phosphatidylinositol-4-phosphate 5-kinase type 1 alpha	gga00562(Inositol phosphate metabolism)//gga01100(Metabolic pathways)//gga04070(Phosphatidylinositol signaling system)//gga04144(Endocytosis)//gga04810(Regulation of actin cytoskeleton)	GO:0030027(lamellipodium)//GO:0005847(mRNA cleavage and polyadenylation specificity factor complex)//GO:0005829(cytosol)//GO:0016607(nuclear speck)//GO:0032587(ruffle membrane)//GO:0005925(focal adhesion)	GO:0005524(ATP binding)//GO:0019900(kinase binding)//GO:0016308(1-phosphatidylinositol-4-phosphate 5-kinase activity)	GO:0048041(focal adhesion assembly)//GO:0090630(activation of GTPase activity)//GO:0097178(ruffle assembly)//GO:0060326(cell chemotaxis)//GO:0046854(phosphatidylinositol phosphorylation)//GO:0006661(phosphatidylinositol biosynthetic process)//GO:0072661(protein targeting to plasma membrane)//GO:0010761(fibroblast migration)//GO:0031532(actin cytoskeleton reorganization)
LMO2	ENSGALG00000028582	protein_coding	-	chr5:17708713-17717820	0.2329	0	inf	inf	1	1	up	374129	rhombotin-2	CGNC:66186|Ensembl:ENSGALG00000029892	5	-	LIM domain only 2		GO:0005667(transcription factor complex)	GO:0048037(cofactor binding)//GO:0001102(RNA polymerase II activating transcription factor binding)//GO:0000977(RNA polymerase II regulatory region sequence-specific DNA binding)//GO:0001190(transcriptional activator activity, RNA polymerase II transcription factor binding)//GO:0043425(bHLH transcription factor binding)//GO:0070888(E-box binding)//GO:0001228(transcriptional activator activity, RN…	GO:0042789(mRNA transcription from RNA polymerase II promoter)//GO:0097067(cellular response to thyroid hormone stimulus)//GO:0045944(positive regulation of transcription from RNA polymerase II promoter)
JMJD8	ENSGALG00000028590	protein_coding	-	chr14:13139990-13151859	4.27514	2.01797	2.11852	1.08306	0.50105	0.994263	up	426917	-	CGNC:52936|Ensembl:ENSGALG00000036577	14	-	jumonji domain containing 8
CCNO	ENSGALG00000028595	protein_coding	-	chrZ:16589251-16590557	0.840592	0	inf	inf	1	1	up	100857393	-	CGNC:65622|Ensembl:ENSGALG00000028595	Z	-	cyclin O		GO:0005654(nucleoplasm)//GO:0005737(cytoplasm)	GO:0004844(uracil DNA N-glycosylase activity)	GO:1903251(multi-ciliated epithelial cell differentiation)//GO:0007049(cell cycle)//GO:0051301(cell division)//GO:0006284(base-excision repair)//GO:0060271(cilium assembly)
BTC	ENSGALG00000028608	protein_coding	+	chr4:34063267-34073559	1.6952	0.691357	2.45198	1.29395	1	1	up	448833	probetacellulin	CGNC:14126|Ensembl:ENSGALG00000028608	4	-	betacellulin	gga04012(ErbB signaling pathway)	GO:0016021(integral component of membrane)//GO:0005615(extracellular space)	GO:0008083(growth factor activity)//GO:0005154(epidermal growth factor receptor binding)	GO:0001556(oocyte maturation)//GO:0008284(positive regulation of cell proliferation)//GO:0060014(granulosa cell differentiation)//GO:0010628(positive regulation of gene expression)//GO:0007173(epidermal growth factor receptor signaling pathway)//GO:0043410(positive regulation of MAPK cascade)//GO:0010468(regulation of gene expression)//GO:0043066(negative regulation of apoptotic process)
ADGRB2	ENSGALG00000028634	protein_coding	-	chr23:4943827-4960852	0.266897	0.0726019	3.67619	1.87821	1	1	up	426163	BAI2	CGNC:52699	23	-	adhesion G protein-coupled receptor B2
AIF1L	ENSGALG00000028635	protein_coding	+	chr17:6079261-6091444	1.21998	0.426625	2.85961	1.51582	1	1	up
-	ENSGALG00000028654	protein_coding	-	chr7:34675655-34790024	0.524489	0.085608	6.12661	2.61509	1	1	up
ZNF800	ENSGALG00000028694	protein_coding	+	chr1:20644894-20659015	0.491738	0.133765	3.67614	1.87819	1	1	up	417747	-	CGNC:6614|Ensembl:ENSGALG00000033997	1	-	zinc finger protein 800			GO:0003676(nucleic acid binding)
-	ENSGALG00000028737	protein_coding	+	chr17:8664889-8688816	9.68711	3.76238	2.57473	1.36442	0.12985	0.994263	up
-	ENSGALG00000028768	protein_coding	+	chr28:4703153-4710012	1.33834	0	inf	inf	1	1	up
C9orf172	ENSGALG00000028823	protein_coding	-	chr17:568201-570706	0.184984	0	inf	inf	1	1	up
DUSP23	ENSGALG00000028854	protein_coding	+	chr25:1678199-1680026	3.05972	0	inf	inf	1	1	up	100858873	-	CGNC:64236	25	-	dual specificity phosphatase 23
LCAT	ENSGALG00000028928	protein_coding	-	chr11:1029317-1036713	0.14653	0	inf	inf	1	1	up	396136	-	CGNC:49668|Ensembl:ENSGALG00000028928	11	-	lecithin-cholesterol acyltransferase	gga00564(Glycerophospholipid metabolism)	GO:0034364(high-density lipoprotein particle)//GO:0070062(extracellular exosome)//GO:0005576(extracellular region)	GO:0034186(apolipoprotein A-I binding)//GO:0004607(phosphatidylcholine-sterol O-acyltransferase activity)	GO:0043691(reverse cholesterol transport)//GO:0034435(cholesterol esterification)//GO:0042158(lipoprotein biosynthetic process)//GO:0006656(phosphatidylcholine biosynthetic process)//GO:0008203(cholesterol metabolic process)//GO:0046470(phosphatidylcholine metabolic process)//GO:0034375(high-density lipoprotein particle remodeling)//GO:0034372(very-low-density lipoprotein particle remodeling)//GO…
TIMM13	ENSGALG00000028937	protein_coding	-	chr28:627971-628532	20.4308	9.96881	2.04947	1.03525	0.3622	0.994263	up	100859352	-	CGNC:63785|Ensembl:ENSGALG00000028937	28	-	translocase of inner mitochondrial membrane 13		GO:0005743(mitochondrial inner membrane)//GO:0001650(fibrillar center)//GO:0042719(mitochondrial intermembrane space protein transporter complex)	GO:0046872(metal ion binding)//GO:0008565(protein transporter activity)	GO:0045039(protein import into mitochondrial inner membrane)//GO:0072321(chaperone-mediated protein transport)
-	ENSGALG00000028938	protein_coding	+	chr13:16647010-16655384	2.56212	0.464502	5.51584	2.46358	1	1	up
LGI2	ENSGALG00000028945	protein_coding	+	chr4:73182368-73204135	0.938282	0.109389	8.57746	3.10055	1	1	up	422809	-	CGNC:51830|Ensembl:ENSGALG00000043283	4	-	leucine rich repeat LGI family member 2
CSRP2	ENSGALG00000028946	protein_coding	-	chr1:38160284-38171384	0.102898	0	inf	inf	1	1	up	396128	BETA-CRP|CRP2	CGNC:66221|Ensembl:ENSGALG00000029921	1	-	cysteine and glycine rich protein 2		GO:0005634(nucleus)	GO:0046872(metal ion binding)	GO:0007275(multicellular organism development)//GO:0030154(cell differentiation)
MPV17L2	ENSGALG00000028984	protein_coding	-	chr28:3758471-3759385	18.9908	8.84519	2.14703	1.10234	0.1881	0.994263	up	100857696	-	CGNC:65338|Ensembl:ENSGALG00000041429	28	-	MPV17 mitochondrial inner membrane protein like 2	gga04146(Peroxisome)	GO:0016021(integral component of membrane)
-	ENSGALG00000028992	protein_coding	-	chr4:37159320-37162614	198.911	73.9421	2.69008	1.42765	0.00045	0.319909	up
YRDC	ENSGALG00000029001	protein_coding	+	chr23:3521014-3527784	0.822381	0.335561	2.45076	1.29323	1	1	up	419610	-	CGNC:66345|Ensembl:ENSGALG00000029001	23	-	yrdC N6-threonylcarbamoyltransferase domain containing
DUSP6	ENSGALG00000029003	protein_coding	+	chr27:3279657-3283459	7.84148	3.83823	2.04299	1.03068	0.19145	0.994263	up	425527	-	CGNC:7544|Ensembl:ENSGALG00000035369	27	-	dual specificity phosphatase 3	gga04010(MAPK signaling pathway)		GO:0008138(protein tyrosine/serine/threonine phosphatase activity)//GO:0004725(protein tyrosine phosphatase activity)	GO:0035335(peptidyl-tyrosine dephosphorylation)
SYPL1	ENSGALG00000029006	protein_coding	-	chr1:14001060-14009388	0.638049	0.260338	2.45085	1.29328	1	1	up	417708	-	CGNC:66293|Ensembl:ENSGALG00000029006	1	-	synaptophysin like 1		GO:0030285(integral component of synaptic vesicle membrane)//GO:0070062(extracellular exosome)//GO:0030141(secretory granule)	GO:0005215(transporter activity)	GO:0006810(transport)
TLDC2	ENSGALG00000029033	protein_coding	+	chr20:593576-597282	1.14756	0	inf	inf	1	1	up	101747236	-	CGNC:66742|Ensembl:ENSGALG00000029033	20	-	TBC/LysM-associated domain containing 2
TMEM204	ENSGALG00000029047	protein_coding	-	chr14:13740762-13819382	0.655029	0	inf	inf	1	1	up	416759	C16orf30	CGNC:7088|Ensembl:ENSGALG00000029047	14	-	transmembrane protein 204		GO:0005886(plasma membrane)//GO:0016021(integral component of membrane)		GO:0030947(regulation of vascular endothelial growth factor receptor signaling pathway)//GO:0001945(lymph vessel development)//GO:0051145(smooth muscle cell differentiation)
-	ENSGALG00000029084	protein_coding	-	chr8:28728160-28734974	2.16818	0.778529	2.78497	1.47766	1	1	up
CISD3	ENSGALG00000029107	protein_coding	+	chr27:4006812-4007489	7.15652	3.33263	2.14741	1.1026	0.42115	0.994263	up	100857847	-	CGNC:65212	27	-	CDGSH iron sulfur domain 3
-	ENSGALG00000029127	protein_coding	+	chr13:1131592-1134055	0.205447	0	inf	inf	1	1	up
-	ENSGALG00000029138	protein_coding	+	chr25:1746787-1963328	2.08601	0.130934	15.9317	3.99383	1	1	up
